# Supplementary material
Source: PubMed Central journal article supplement (PMC5492993)

Figure S1. Bar graphs of haplotype sharing distributions between individual dogs of each breed for all 161 dog breeds, three varieties, three country of origin populations and two wild canids. Breeds are colored and ordered according to clade position in Figure 1. Graphs are presented in alphabetical order by name.



# Airedale Terrier

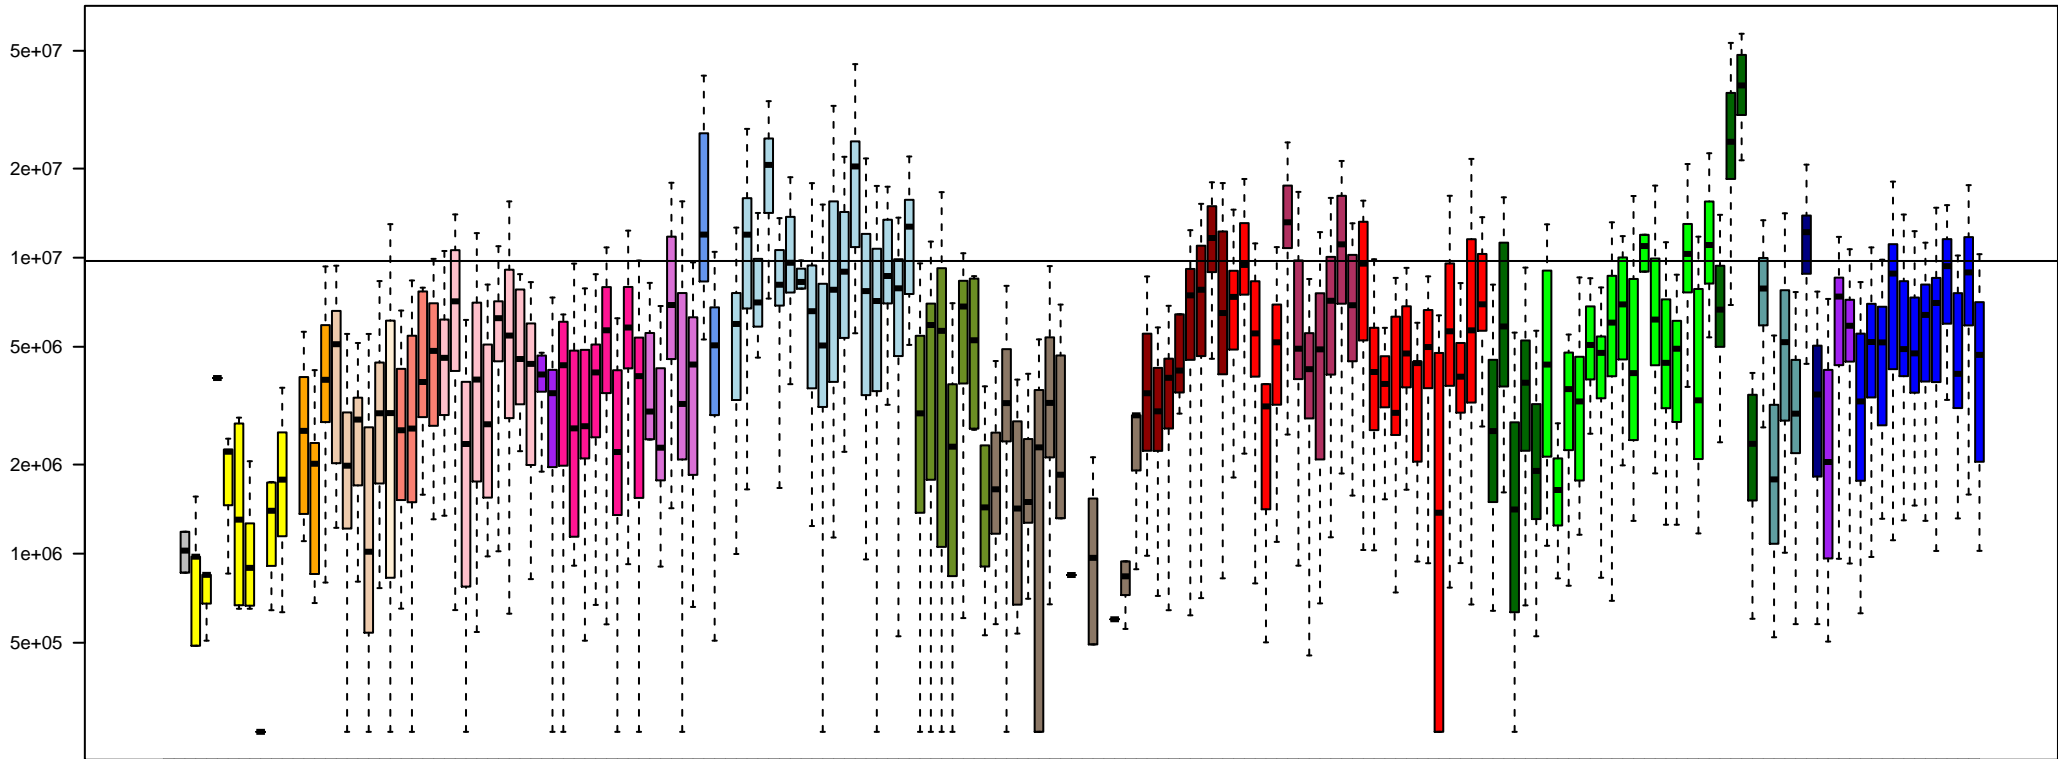



# Alaskan Malamute

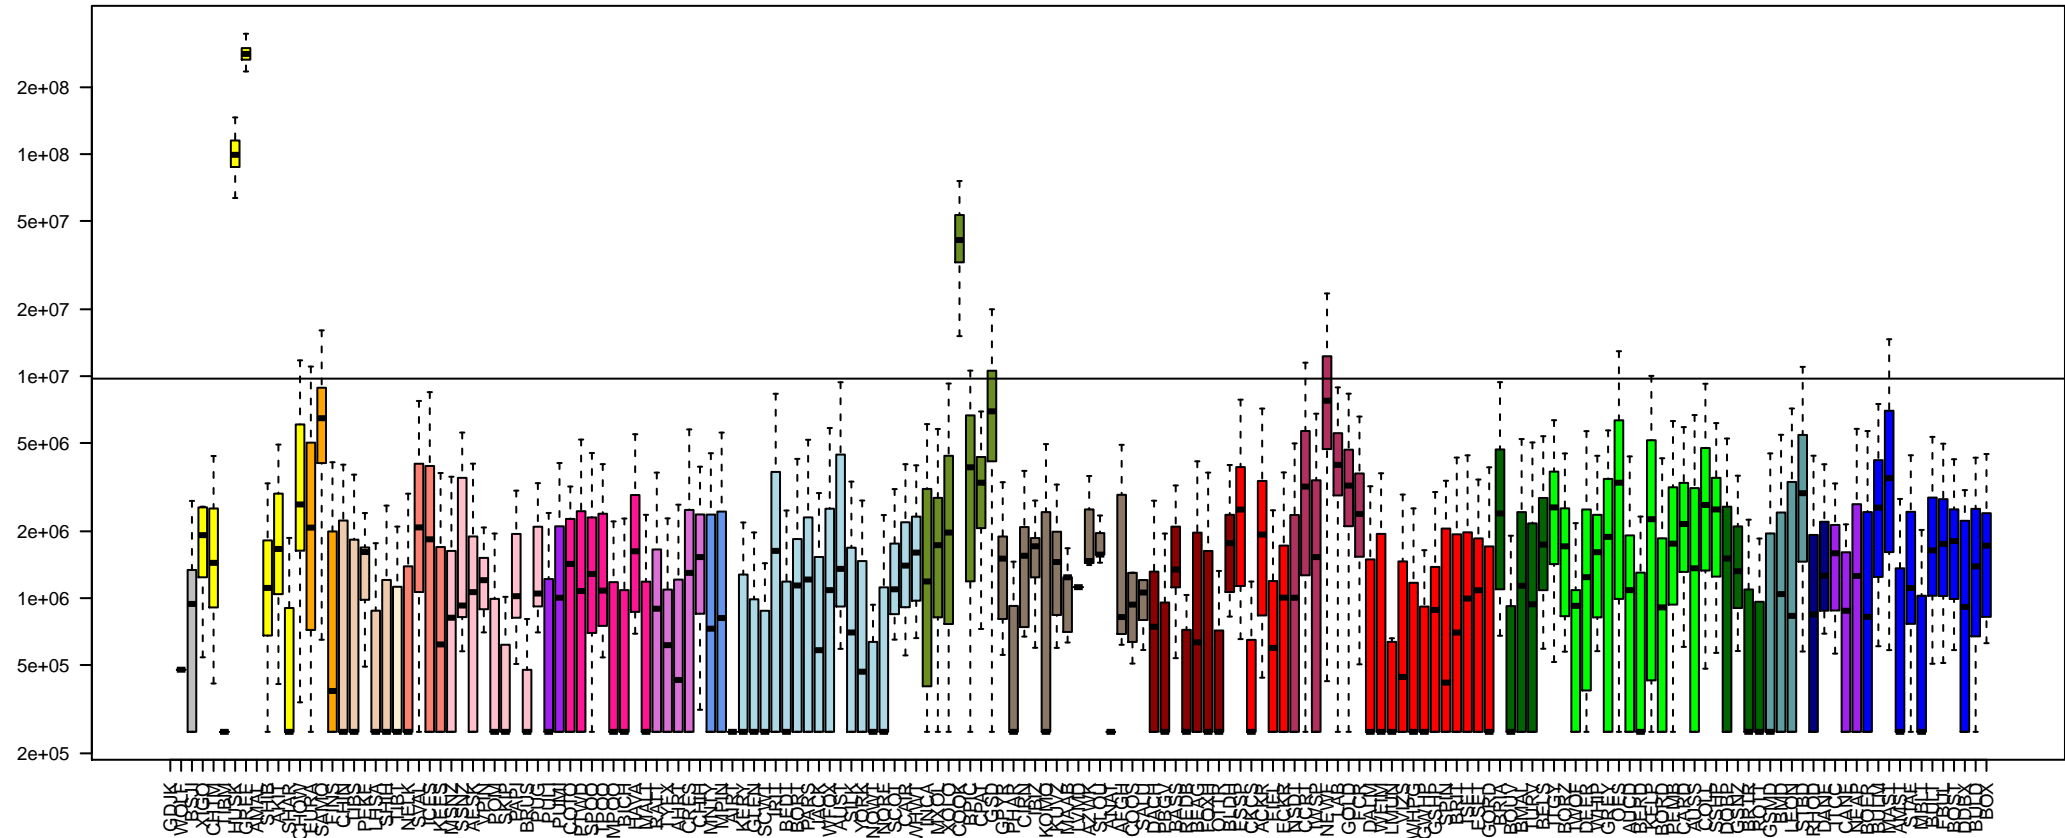

# American Cocker Spaniel

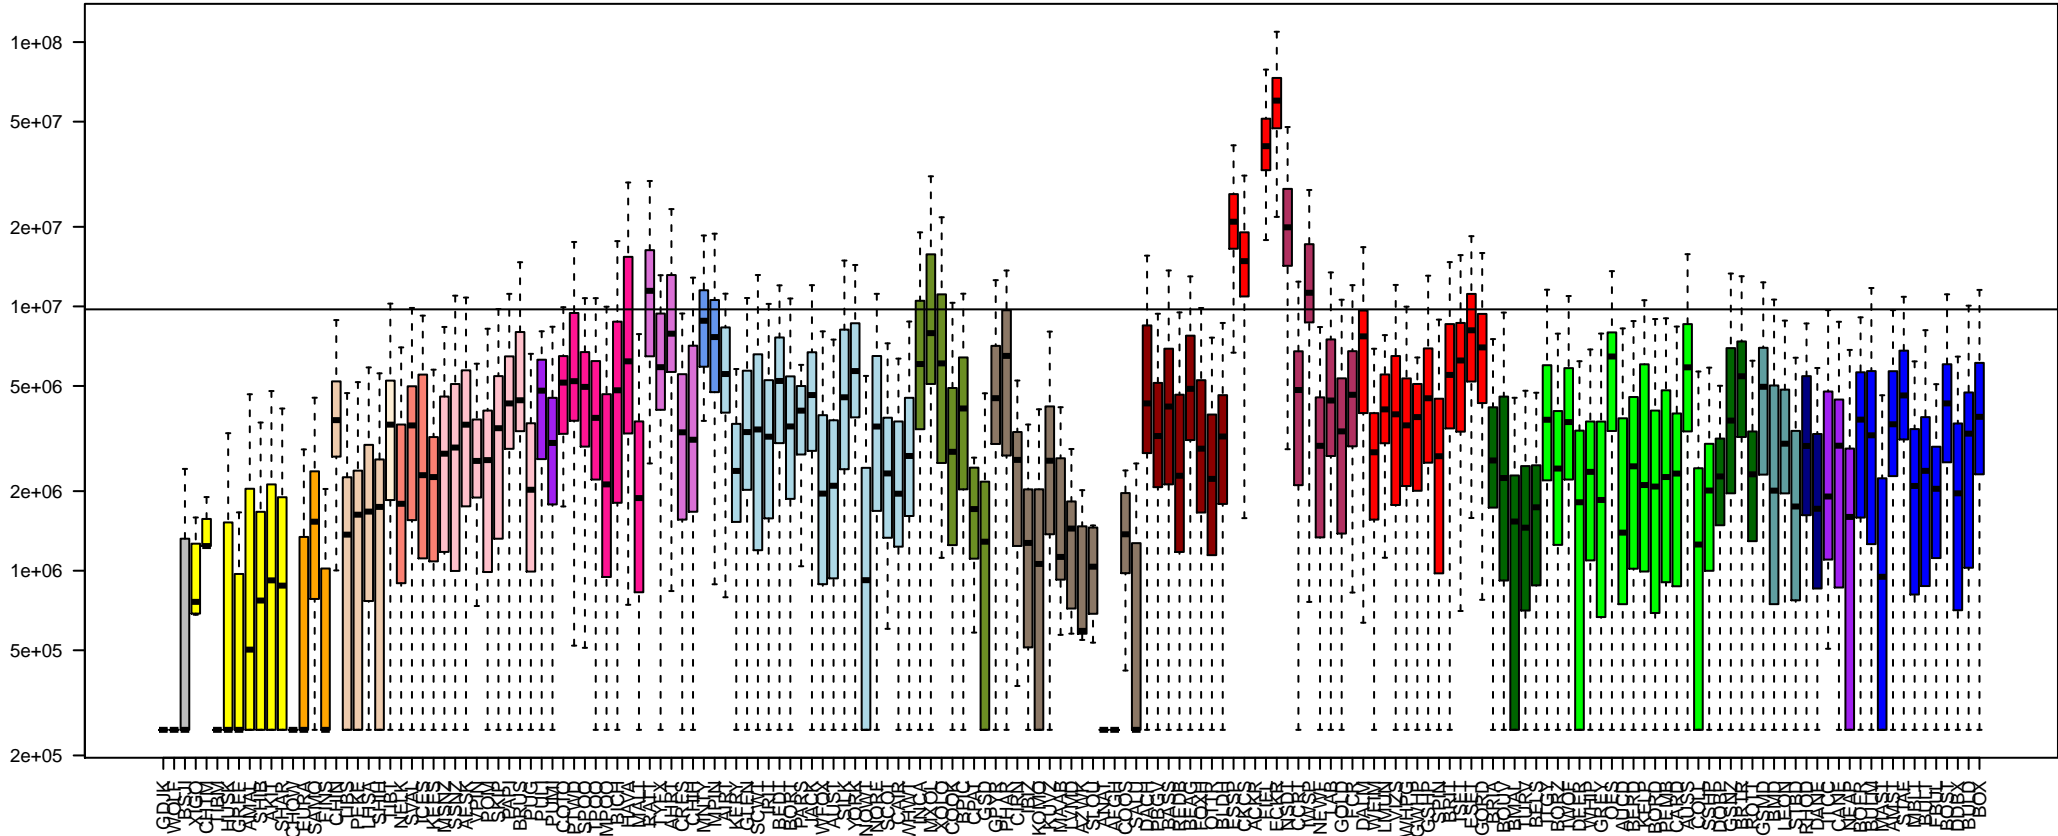



# American Hairless Terrier

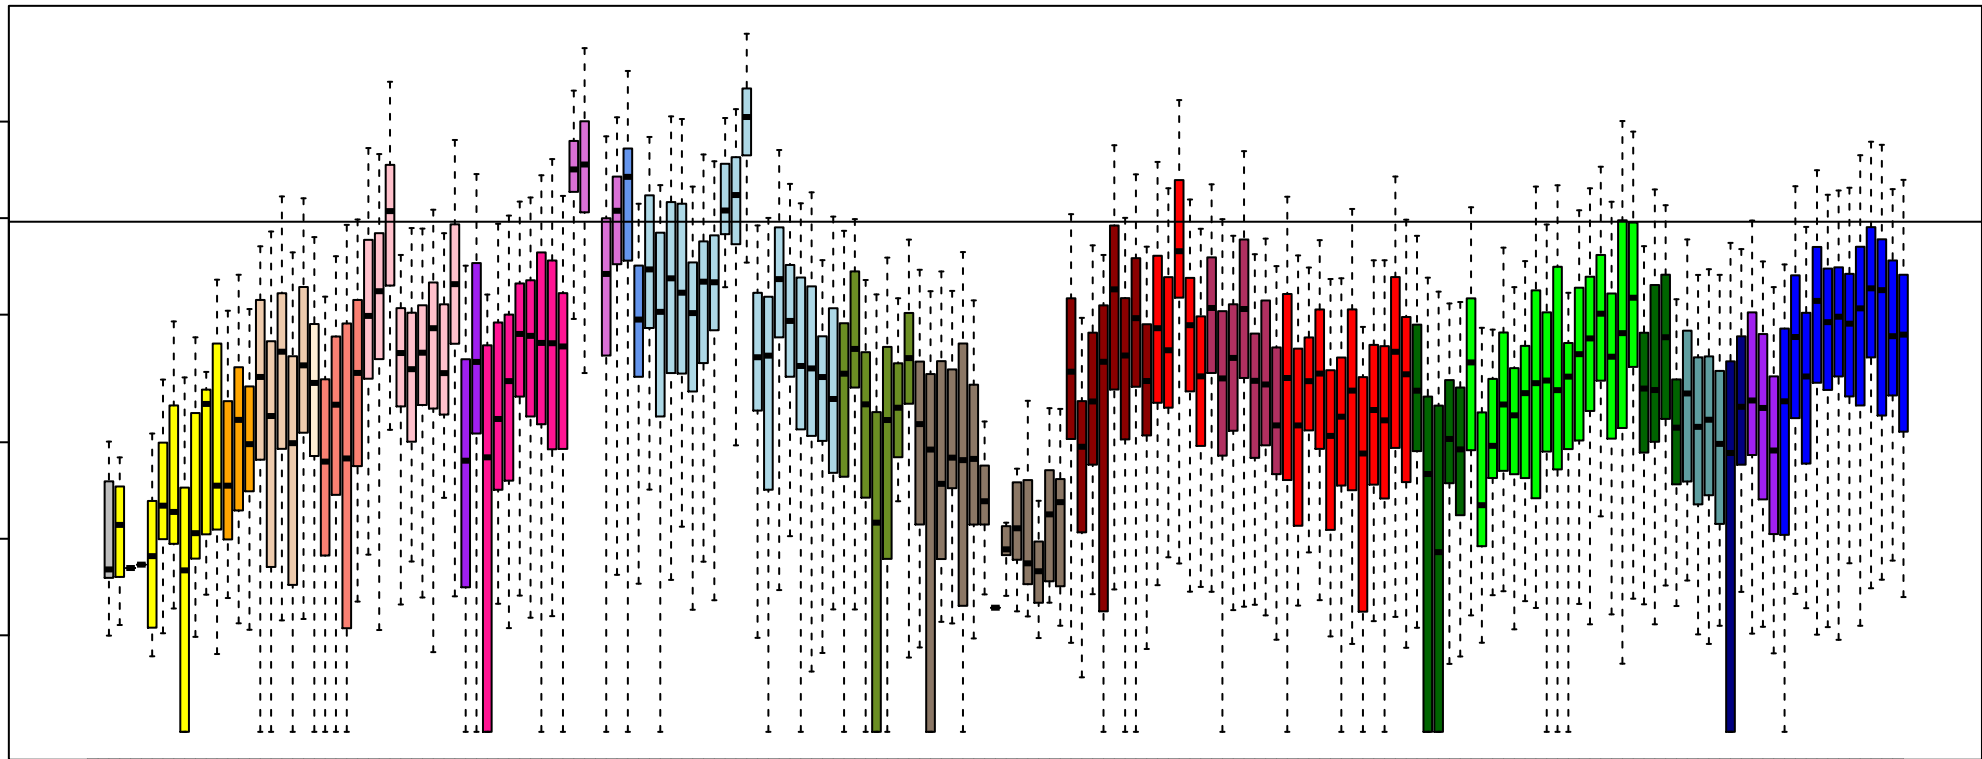

A-Z 0-9 @ # % & \* + - = < > ~



# American Staffordshire Terrier

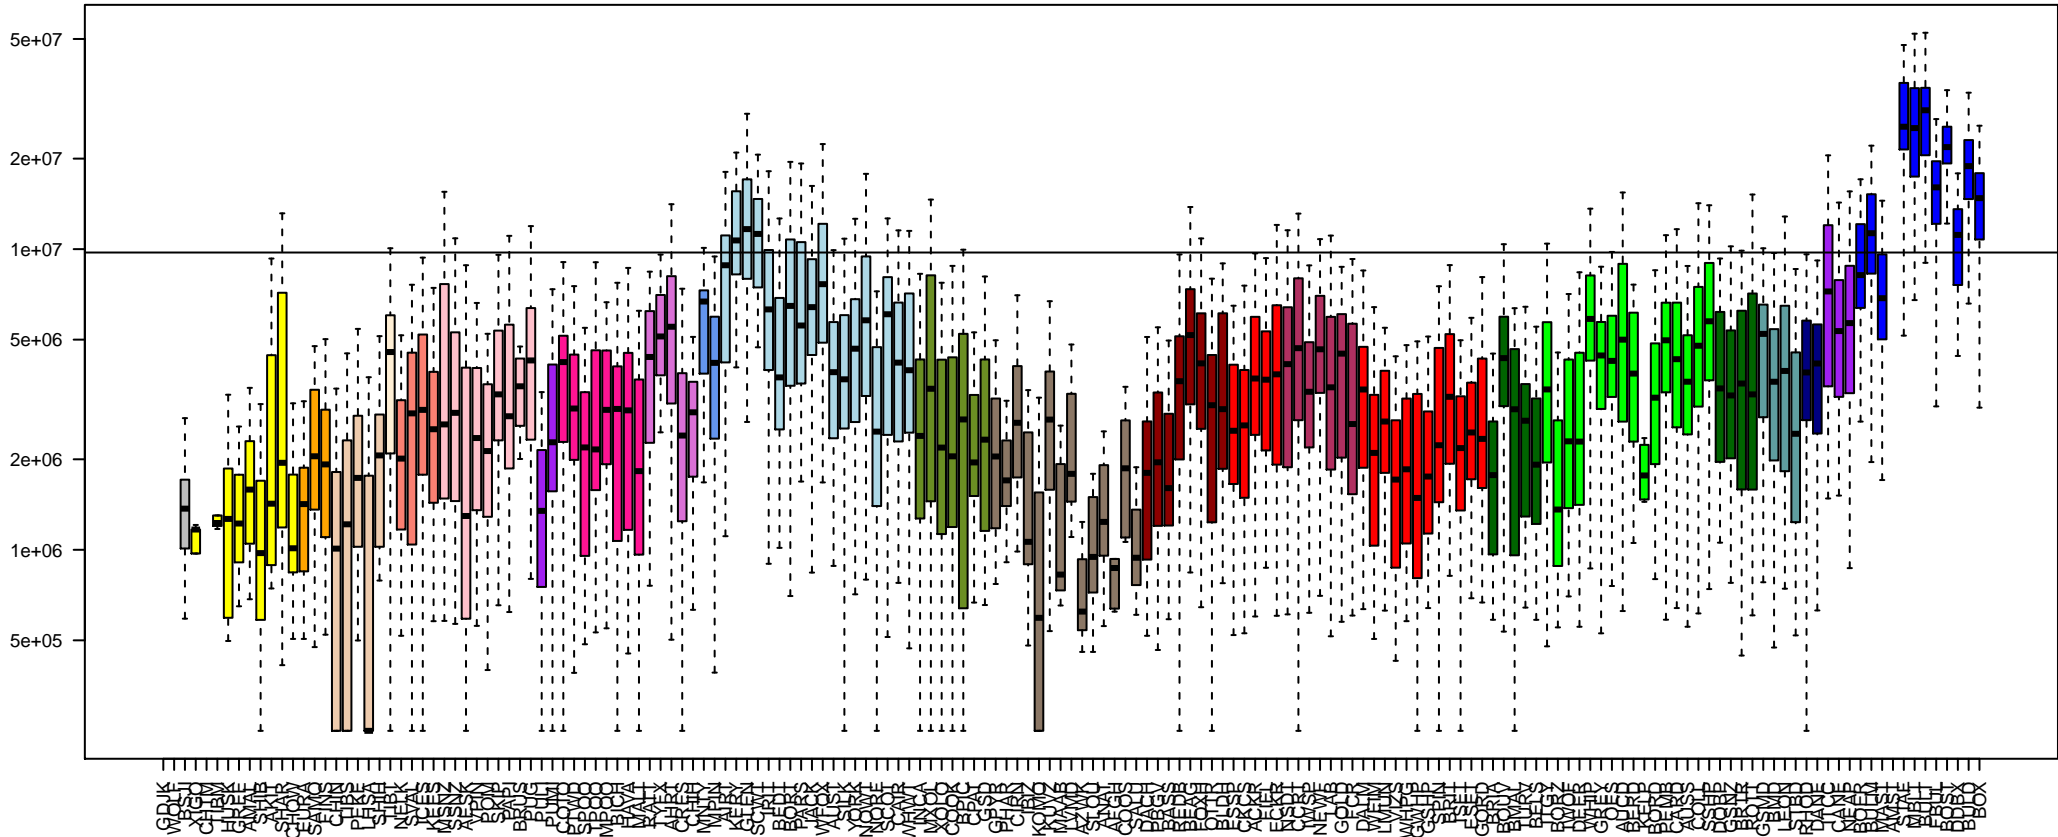



# Australian Cattle Dog

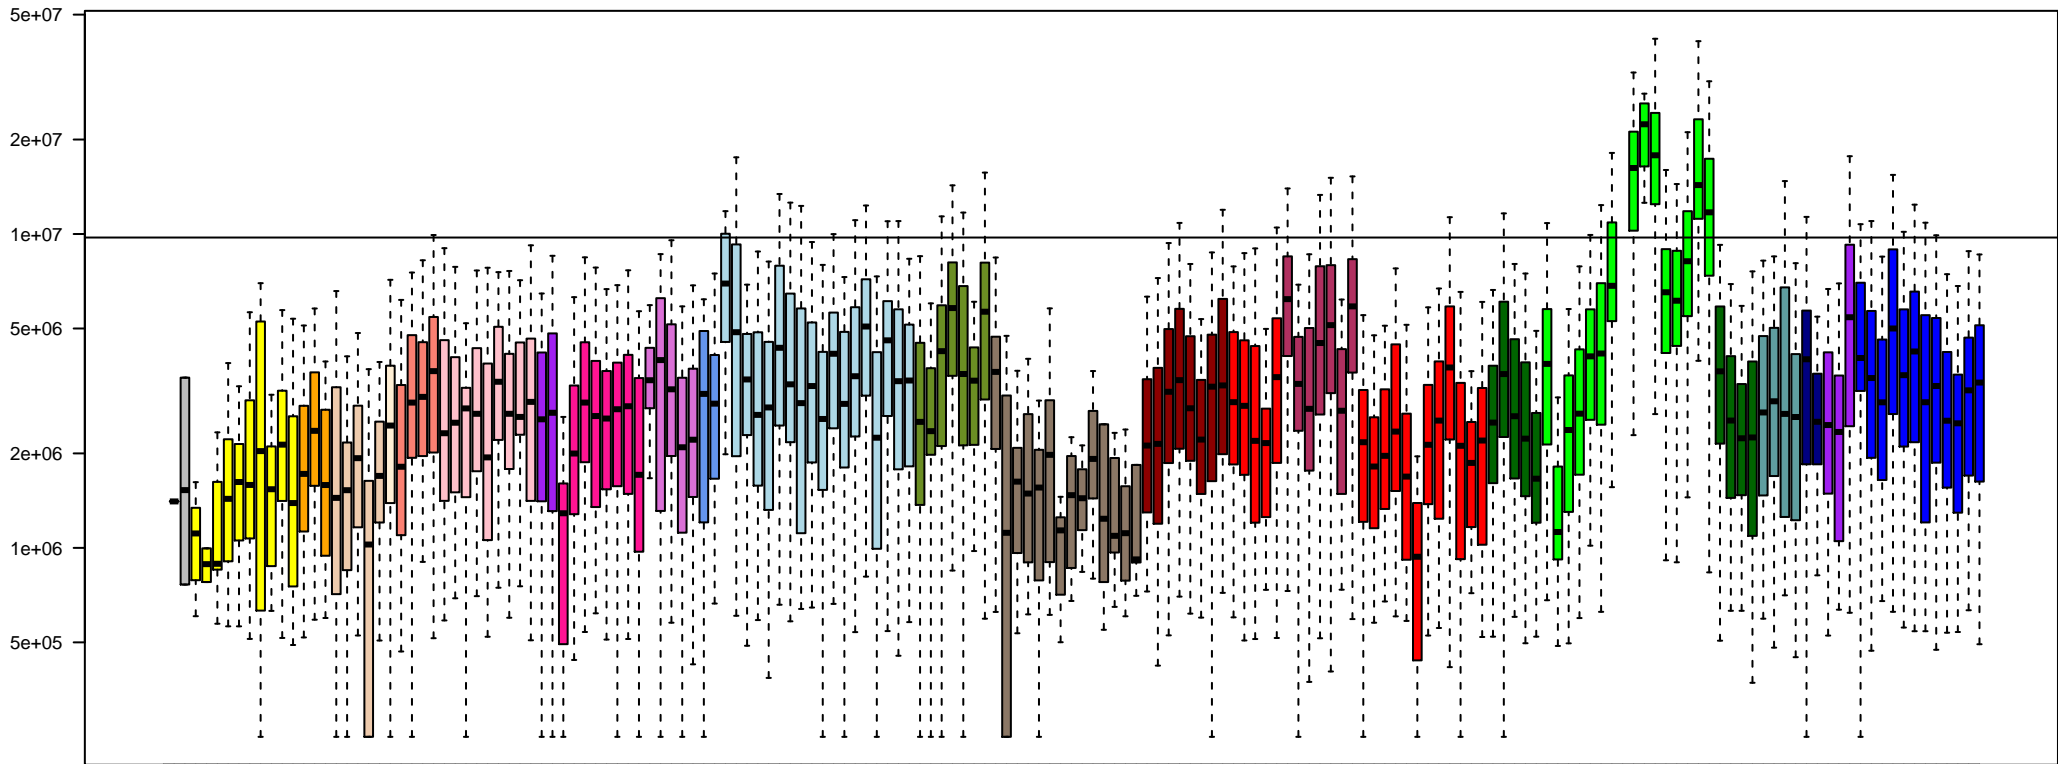

1 2 3 4 5 6 7 8 9 10 11 12 13 14 15 16 17 18 19 20 21 22 23 24 25 26 27 28



# Australian Terrier

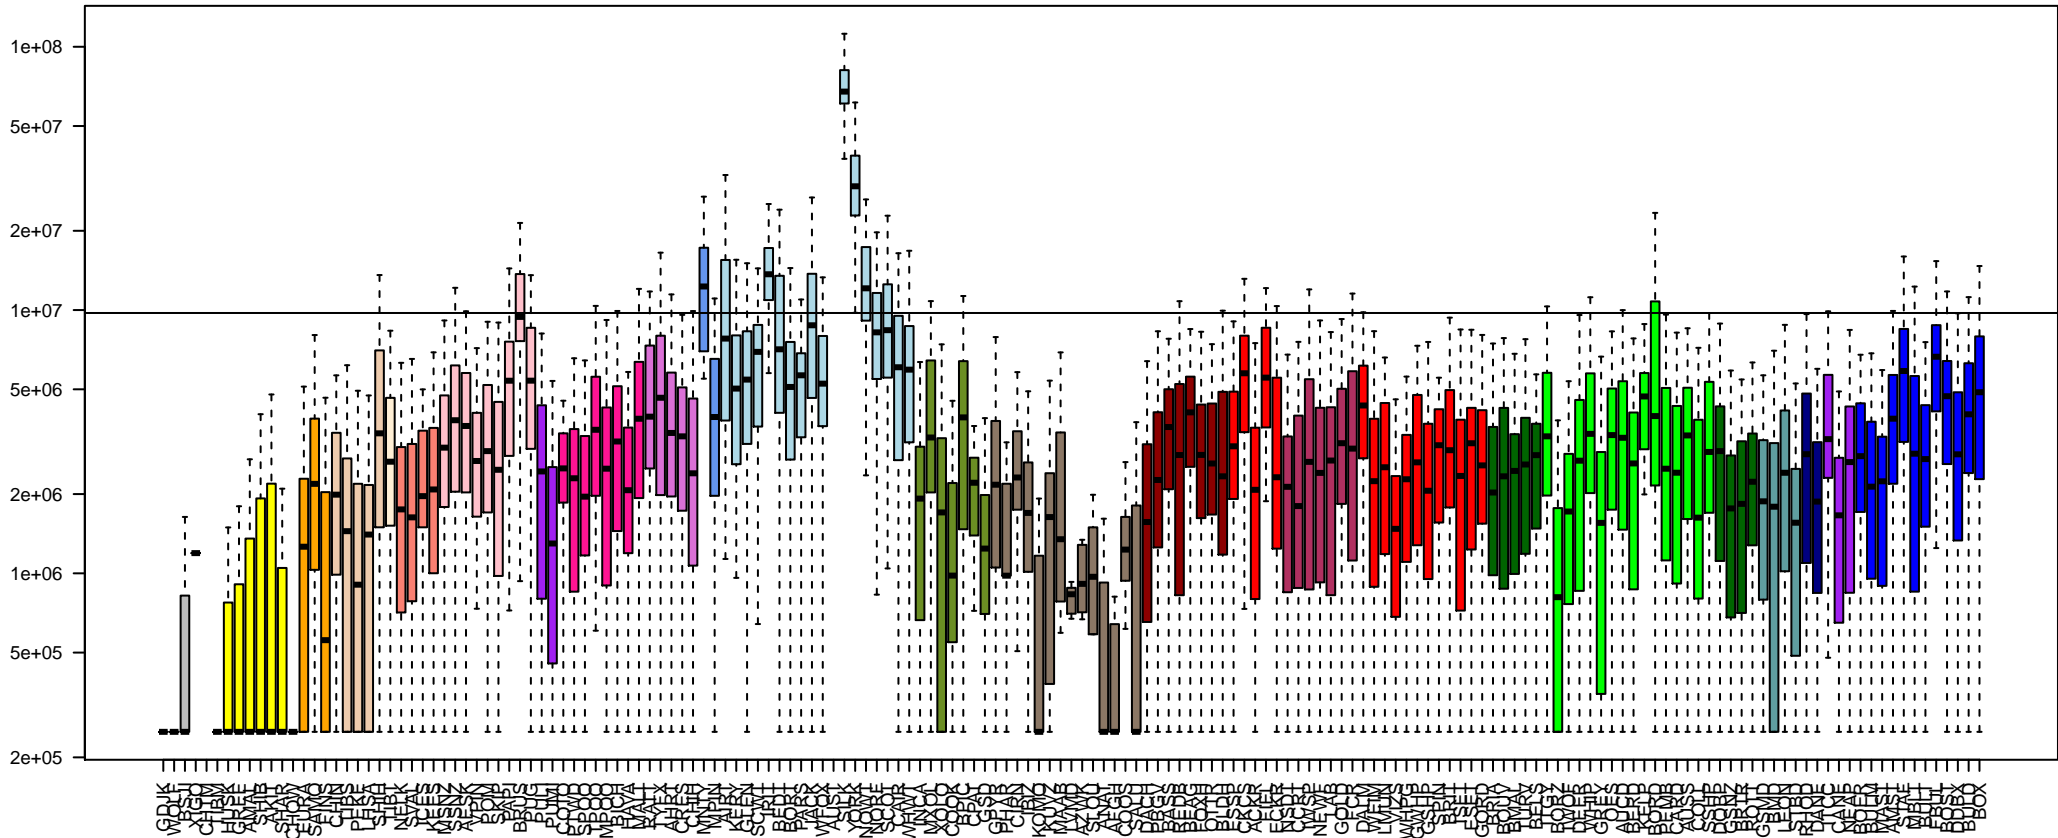



# Basenji

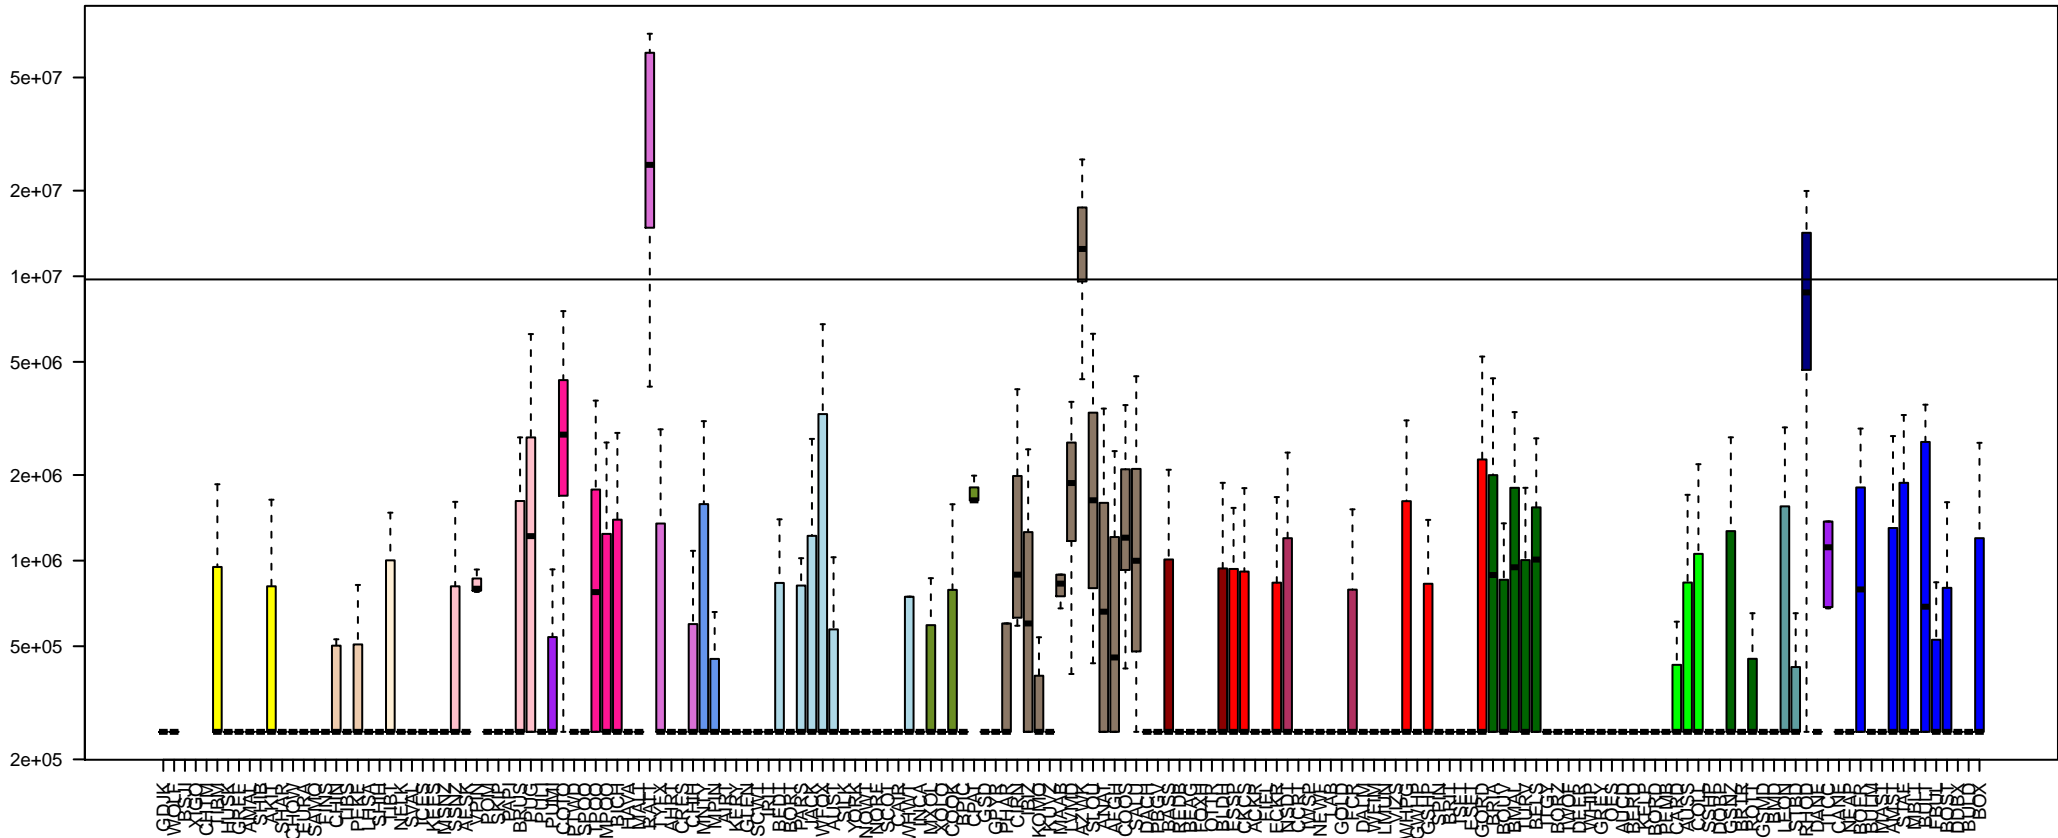

# Basset Hound

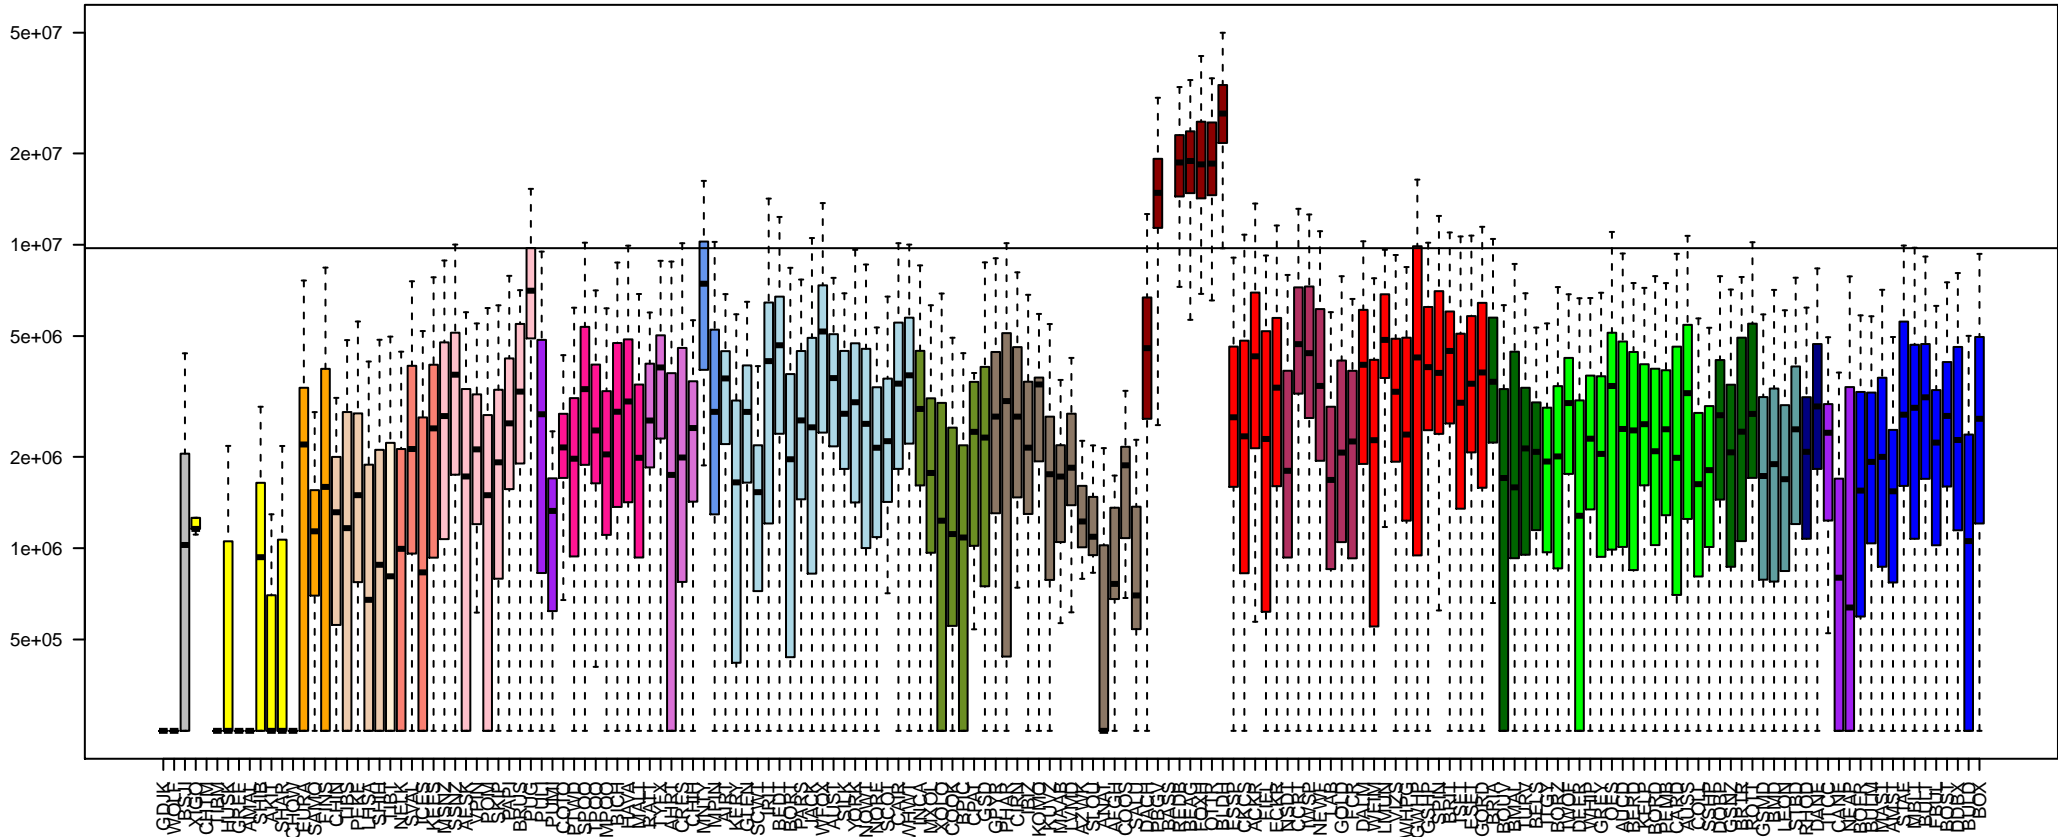



# Beagle

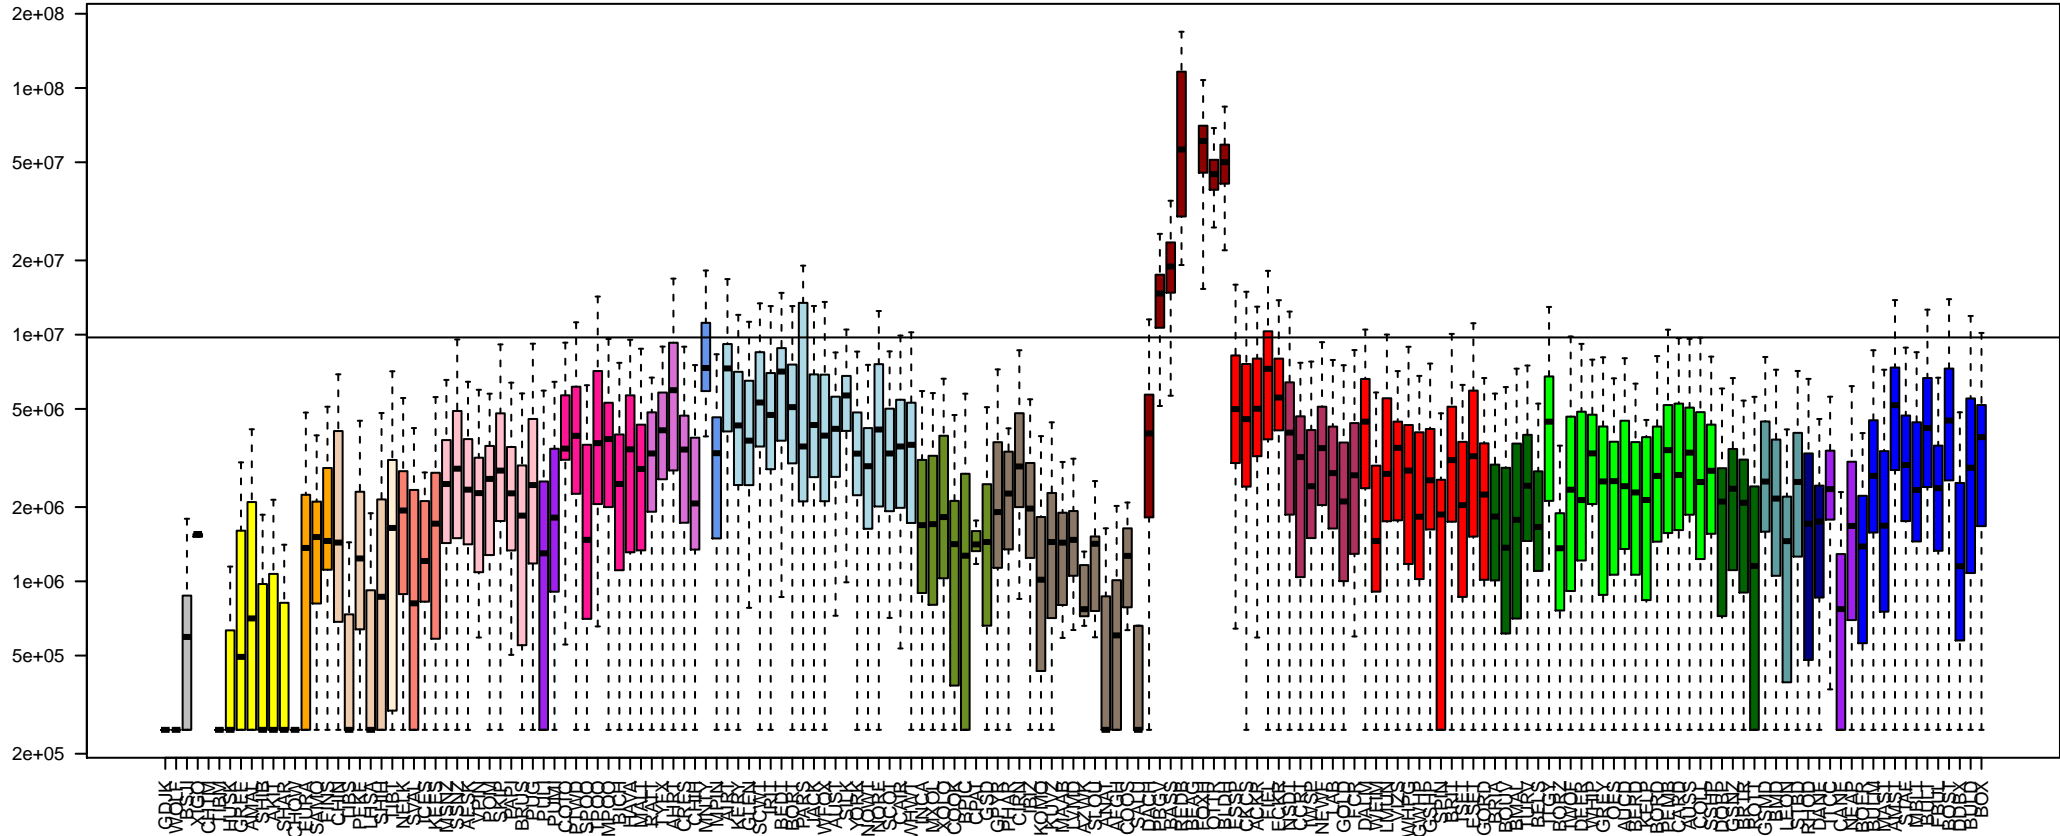

# Bearded Collie

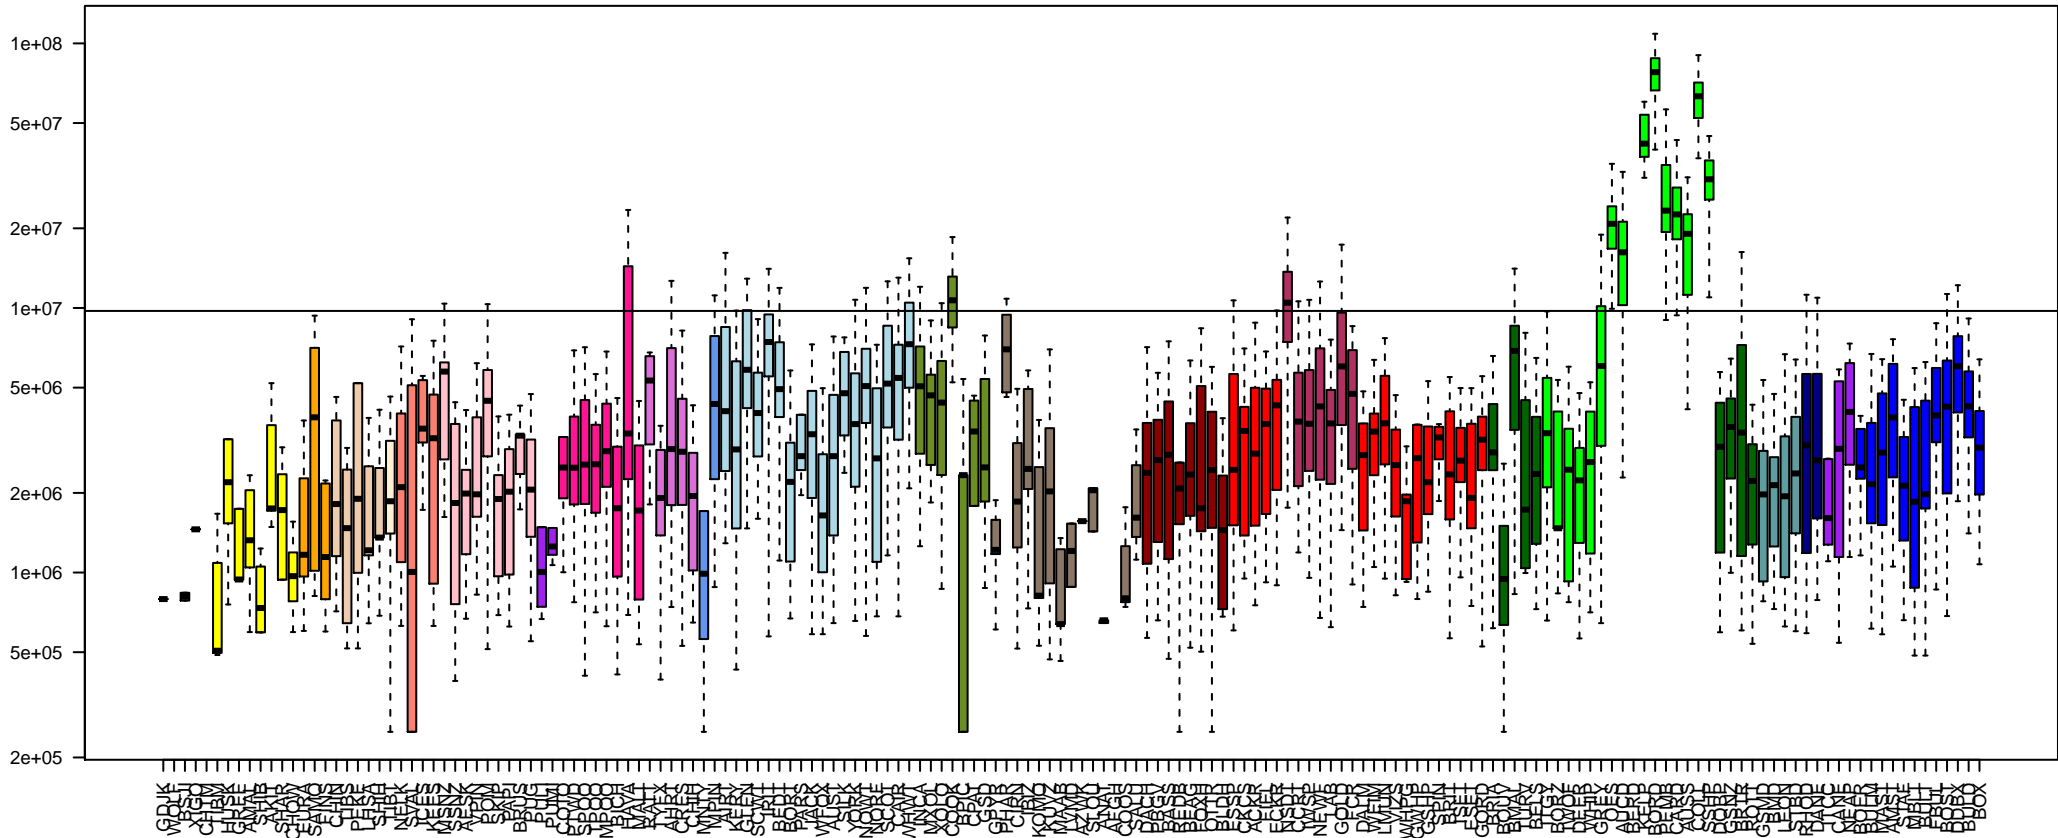

# Bedlington Terrier

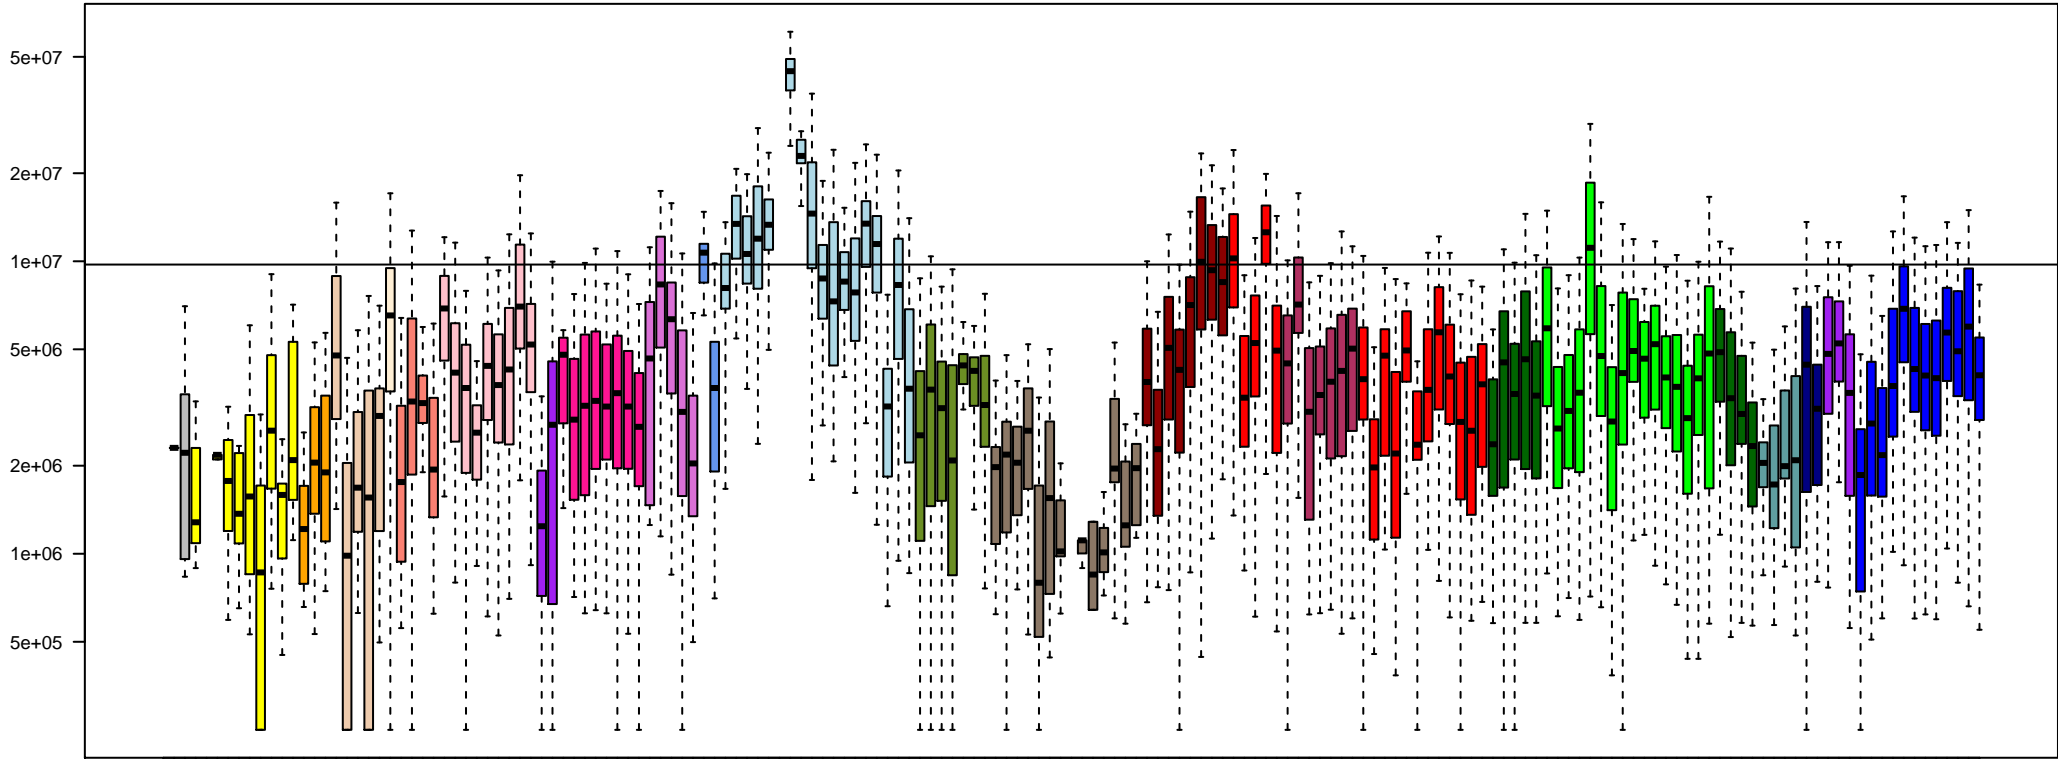

100 categories of data represented by small box plots along the x-axis.

# Belgian Malinois

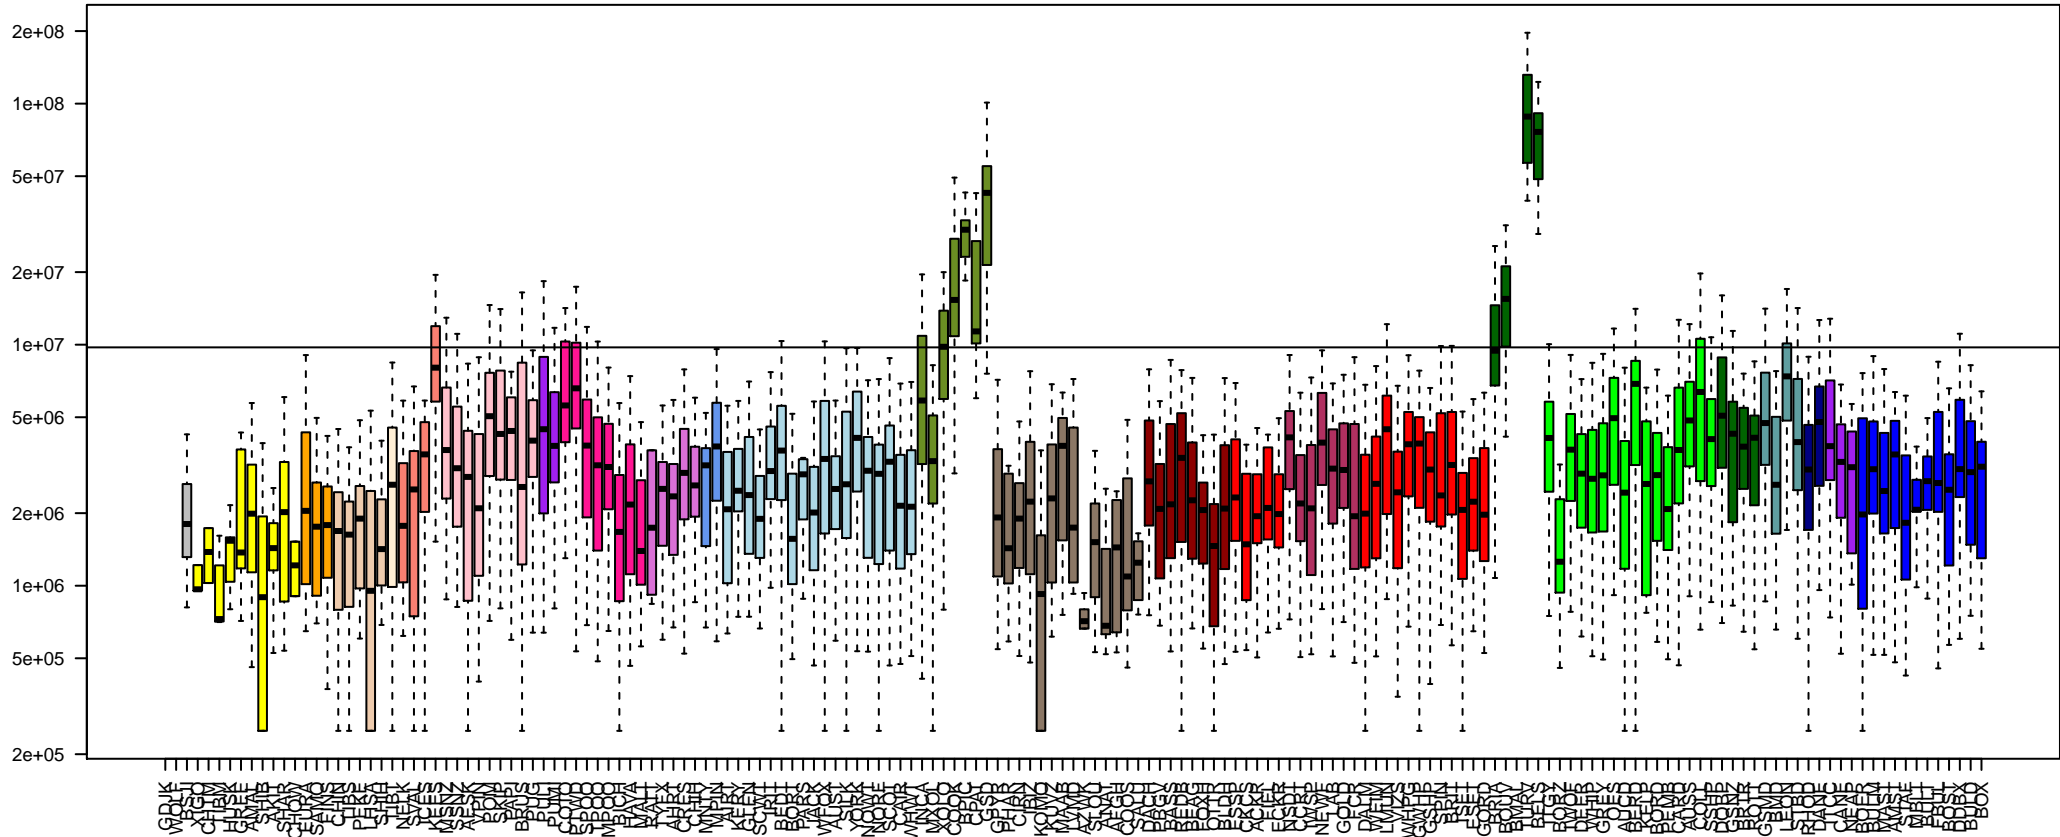

# Belgian Sheepdog

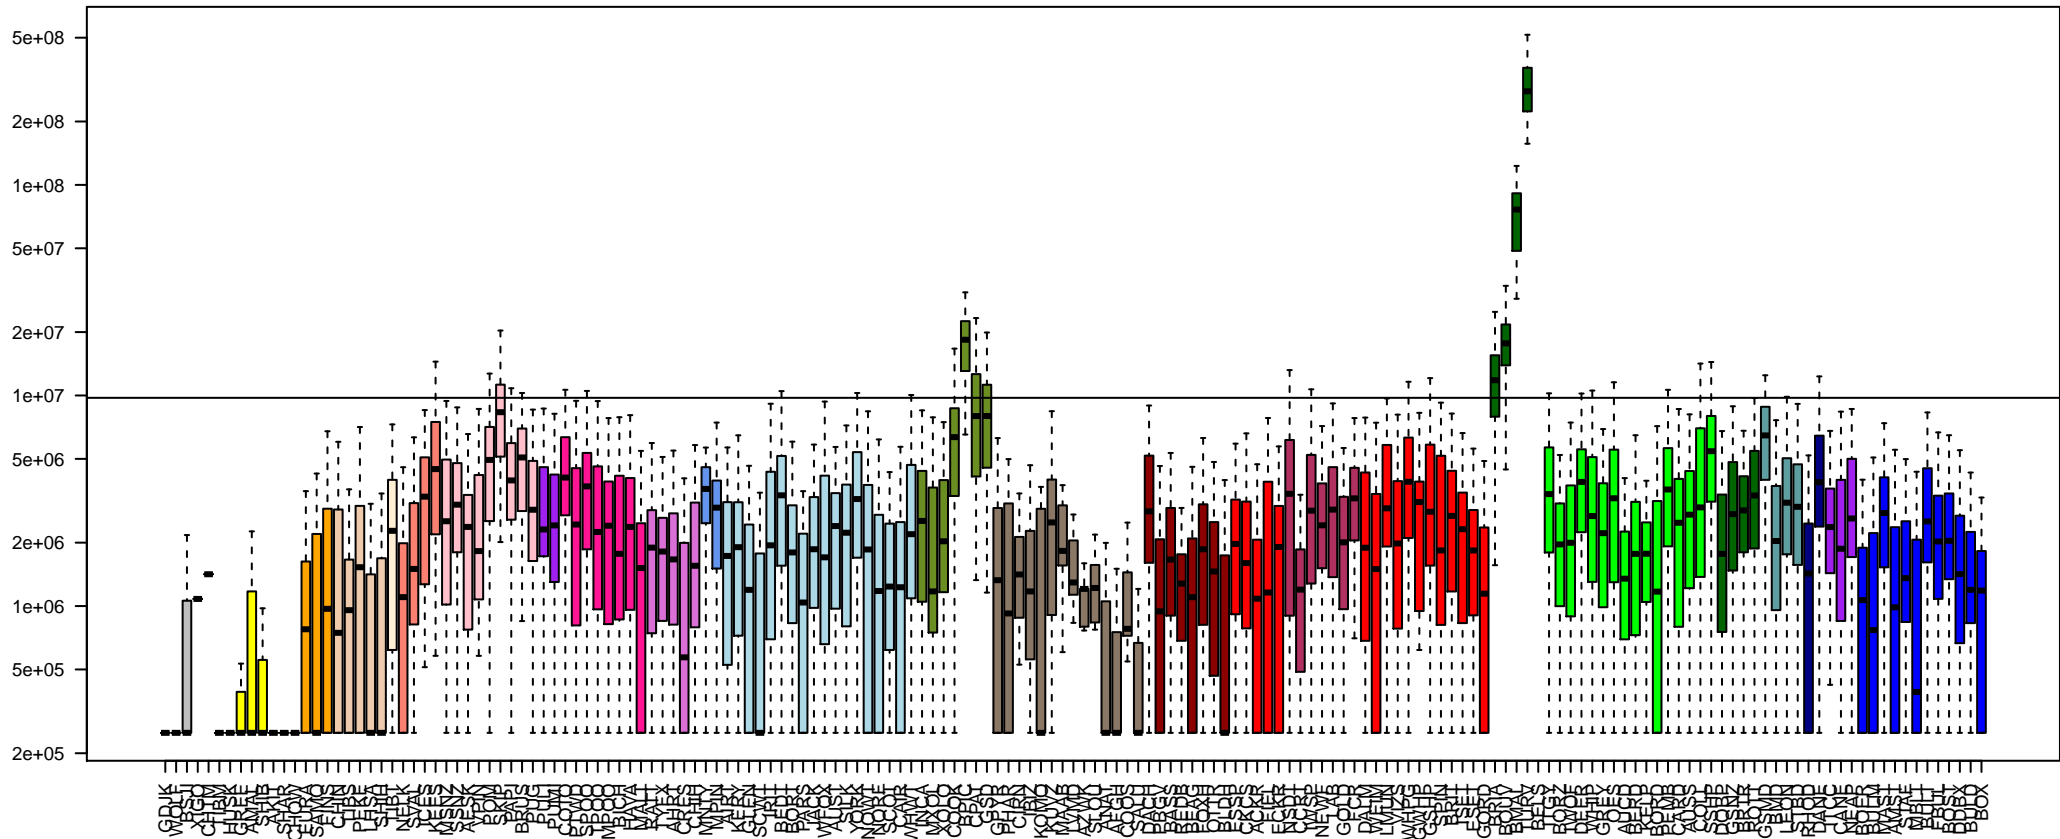

# Belgian Tervuren

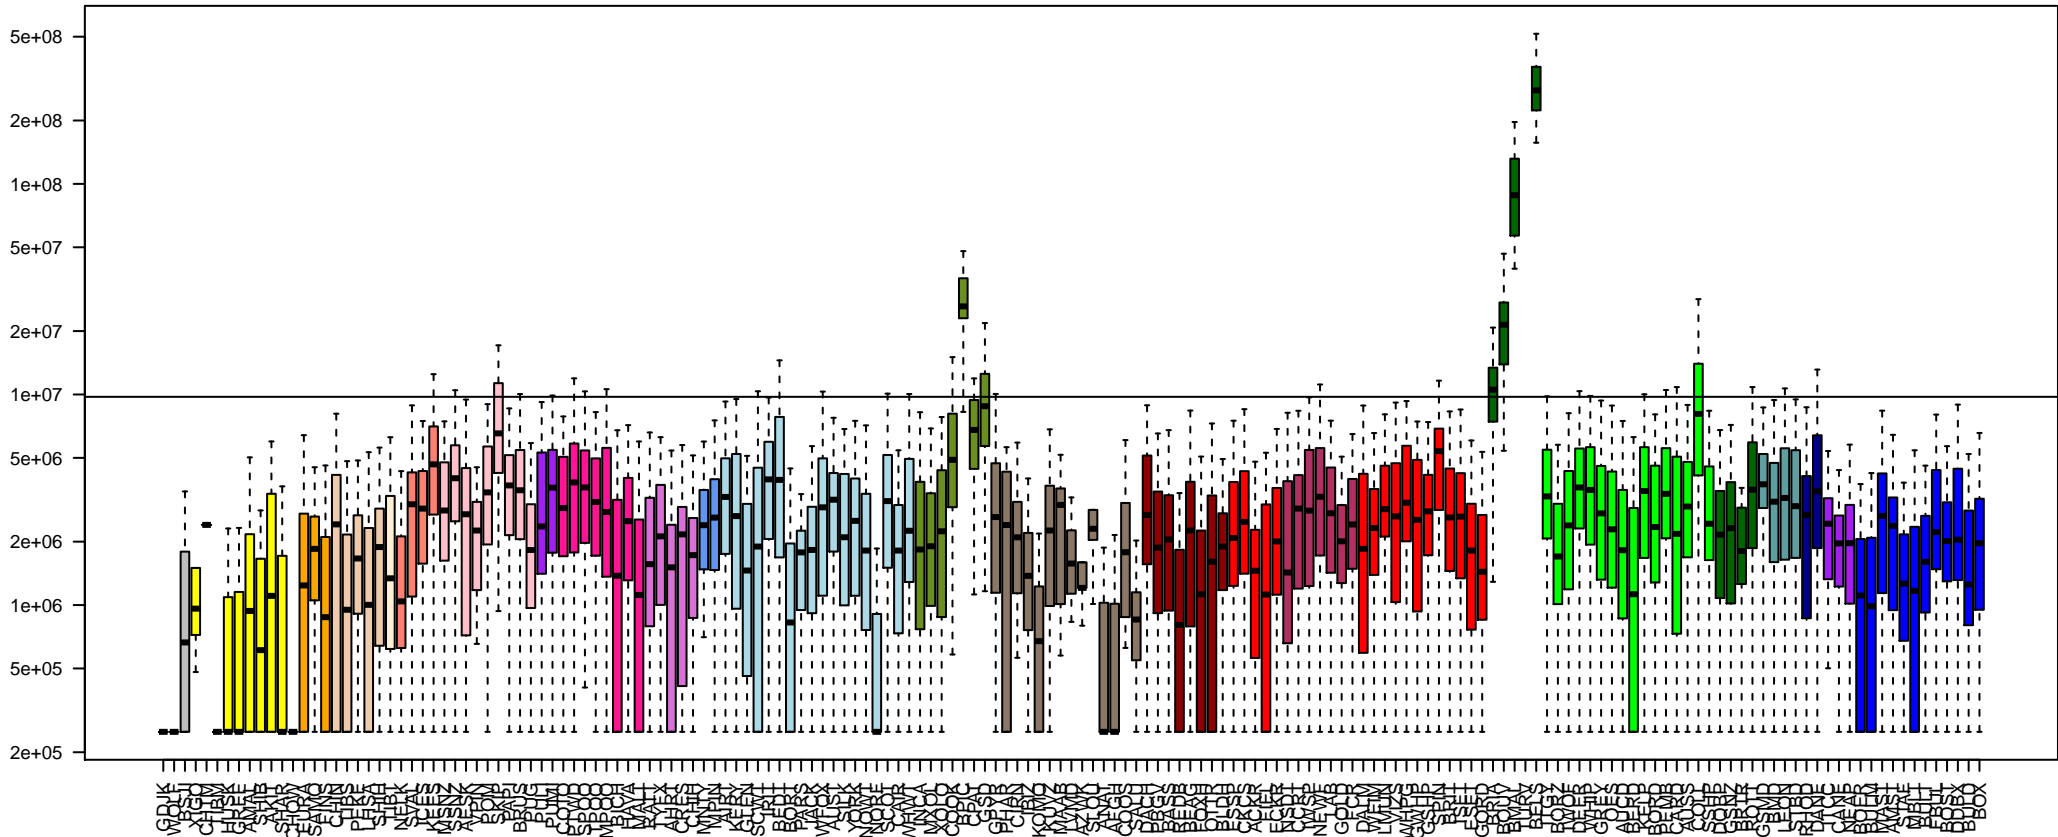

# Berger Picard

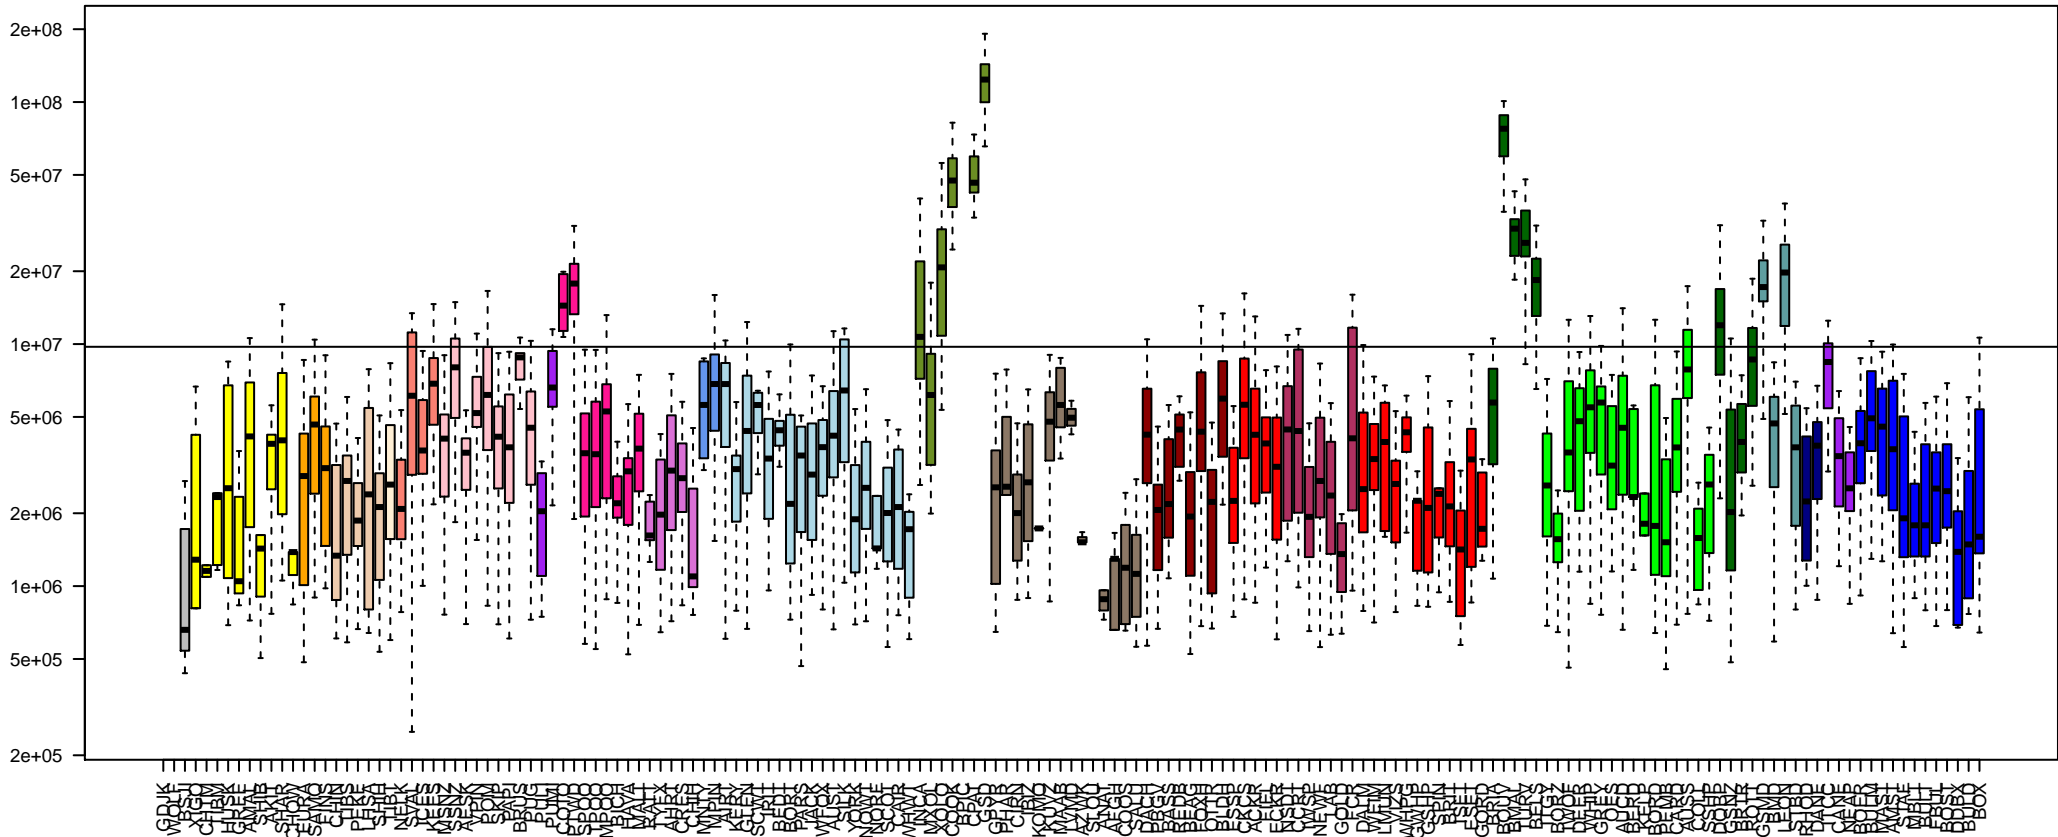

# Bernese Mountain Dog

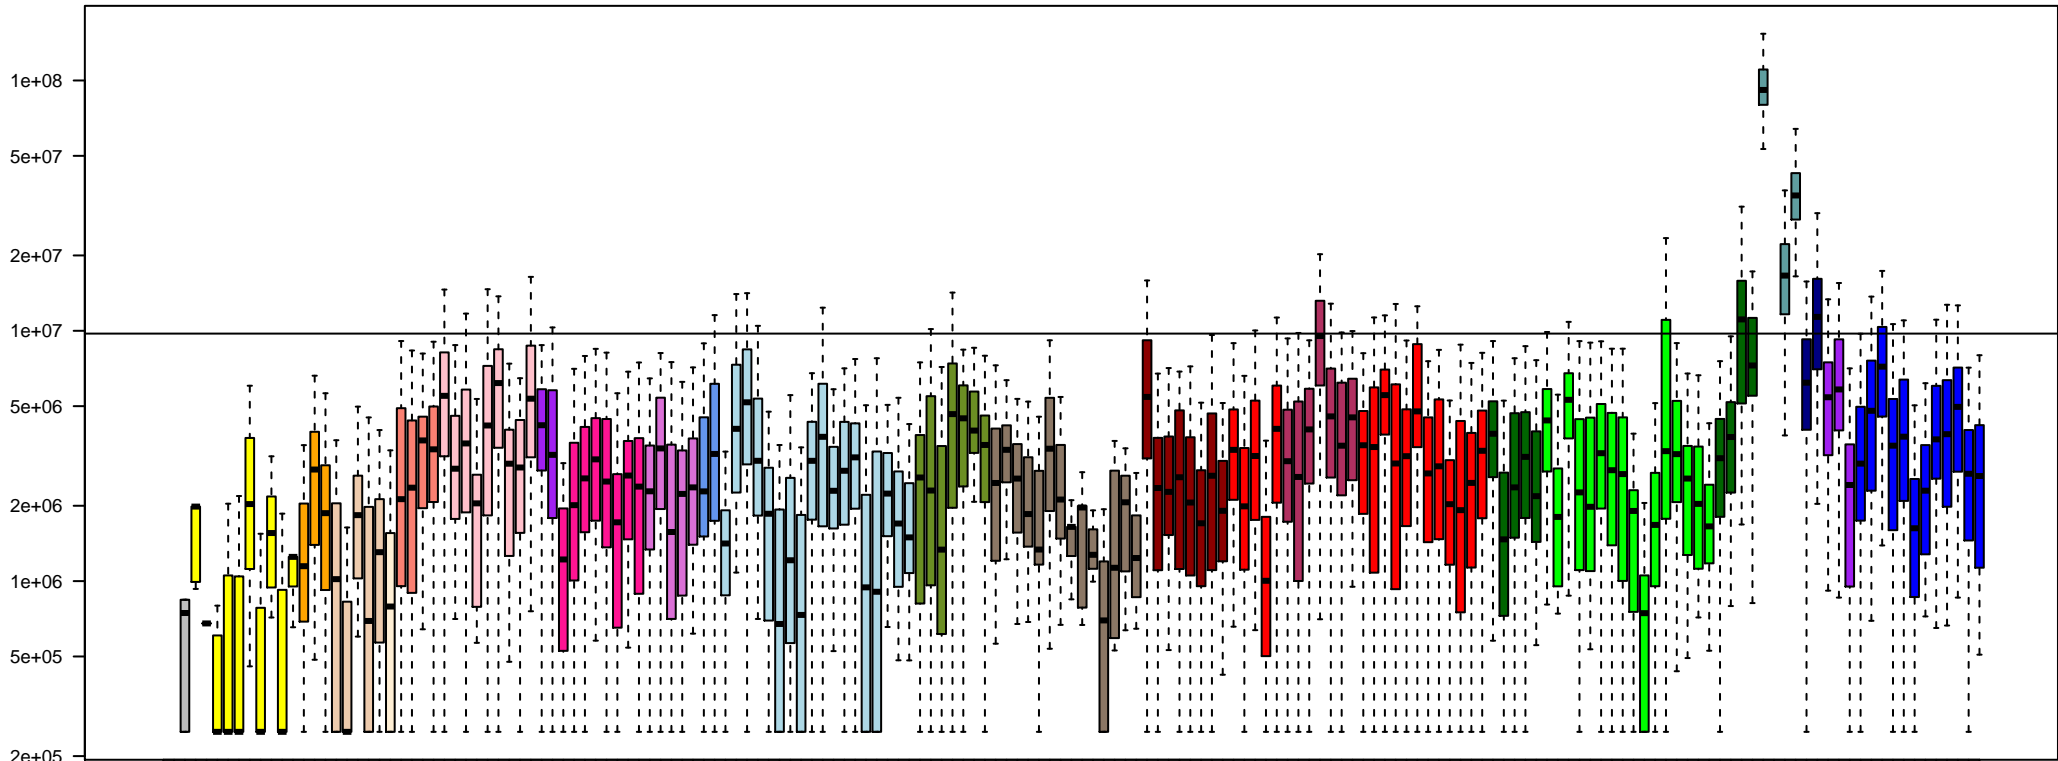

Y-axis labels: 2e+05, 5e+05, 1e+06, 2e+06, 5e+06, 1e+07, 2e+07, 5e+07, 1e+08

X-axis labels: 1, 2, 3, 4, 5, 6, 7, 8, 9, 10, 11, 12, 13, 14, 15, 16, 17, 18, 19, 20, 21, 22, 23, 24, 25, 26, 27, 28, 29, 30, 31, 32, 33, 34, 35, 36, 37, 38, 39, 40, 41, 42, 43, 44, 45, 46, 47, 48, 49, 50, 51, 52, 53, 54, 55, 56, 57, 58, 59, 60, 61, 62, 63, 64, 65, 66, 67, 68, 69, 70, 71, 72, 73, 74, 75, 76, 77, 78, 79, 80, 81, 82, 83, 84, 85, 86, 87, 88, 89, 90, 91, 92, 93, 94, 95, 96, 97, 98, 99, 100





# Black Russian Terrier

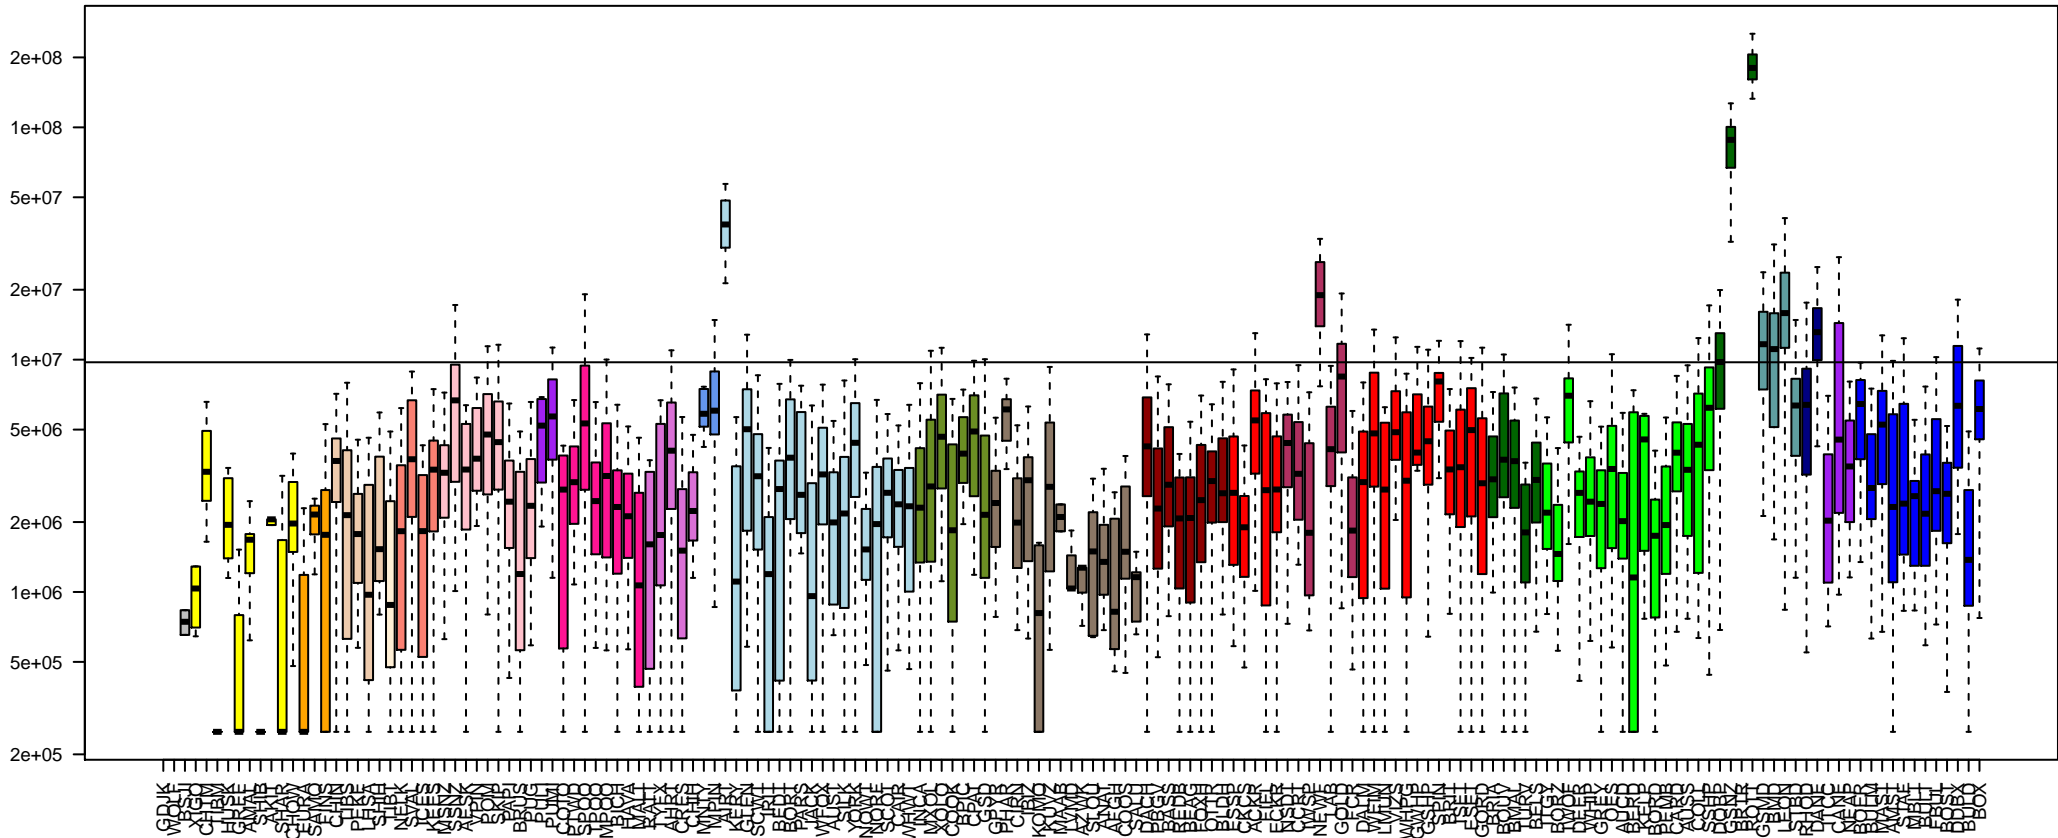

# Bloodhound

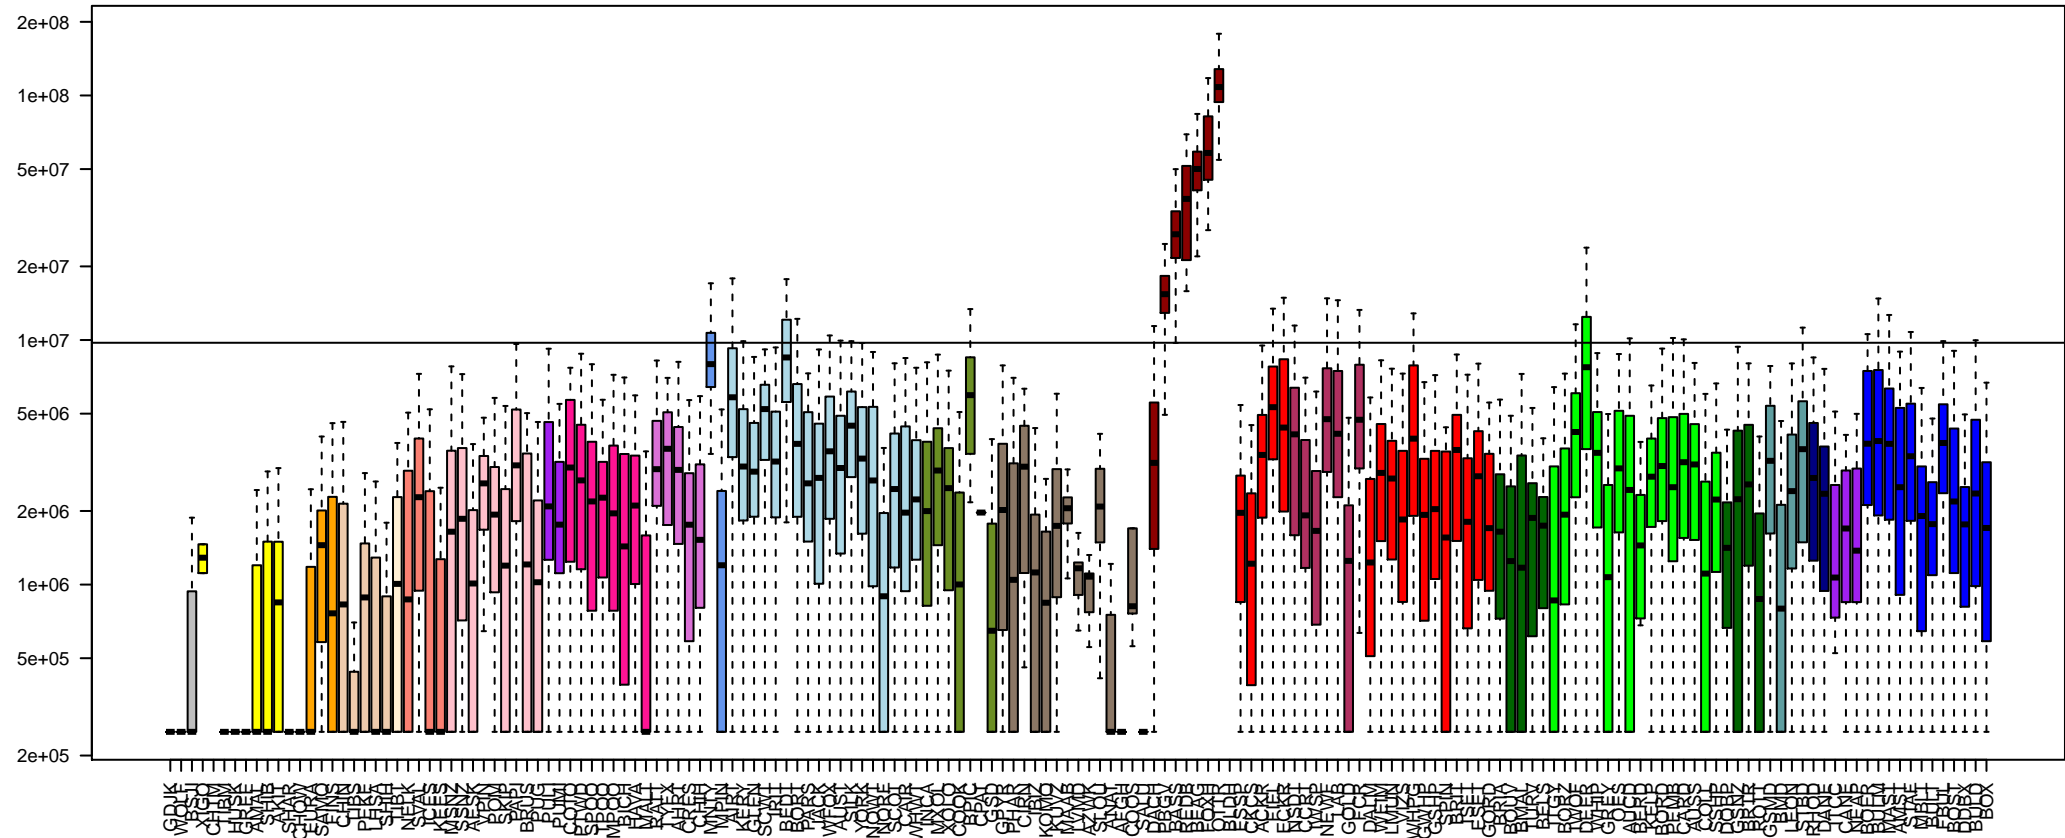

# Boerboel

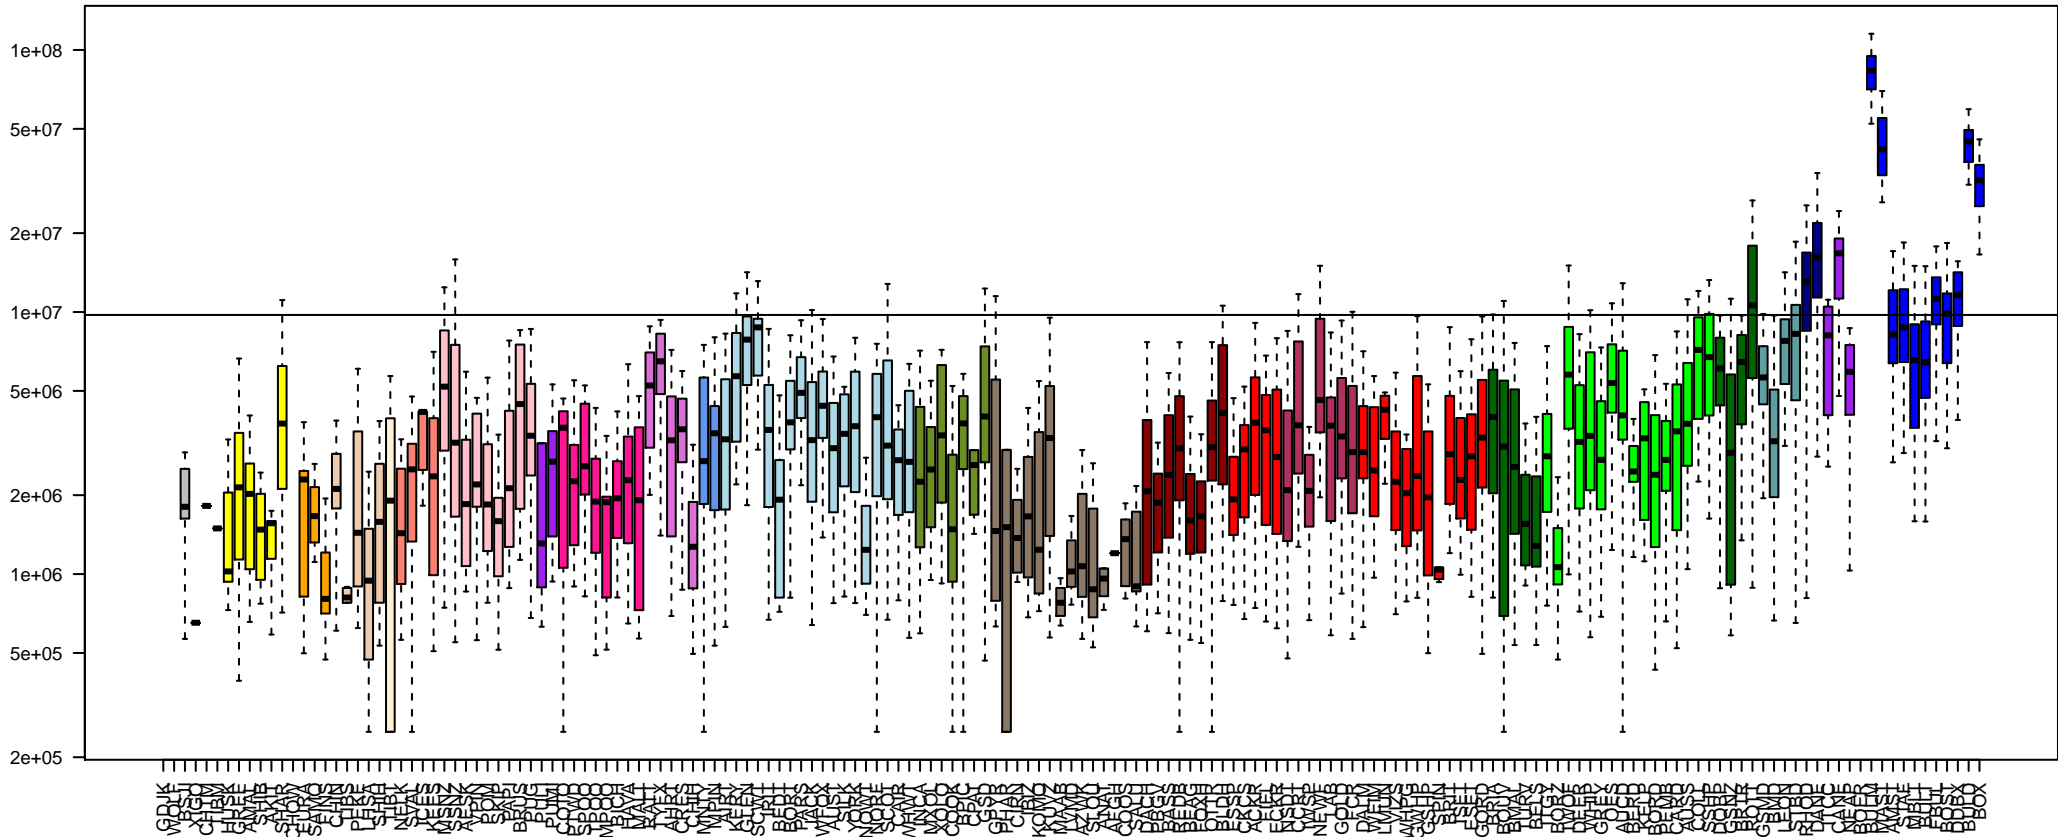

# Border Collie

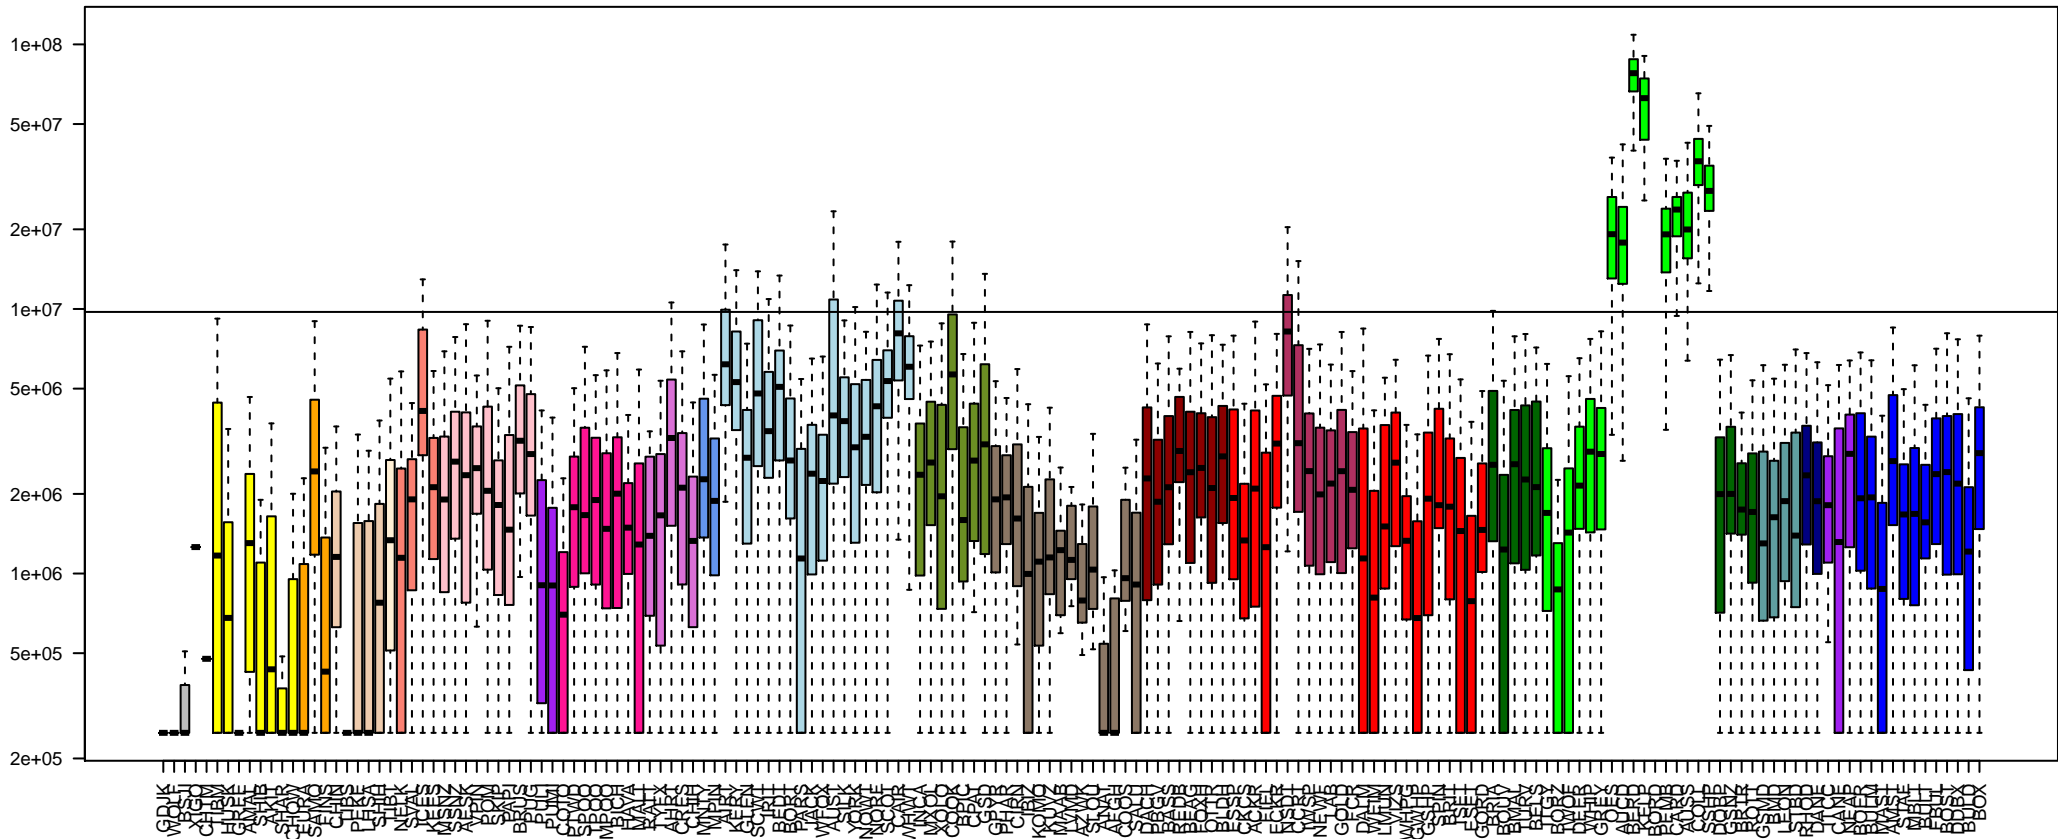

# Border Terrier

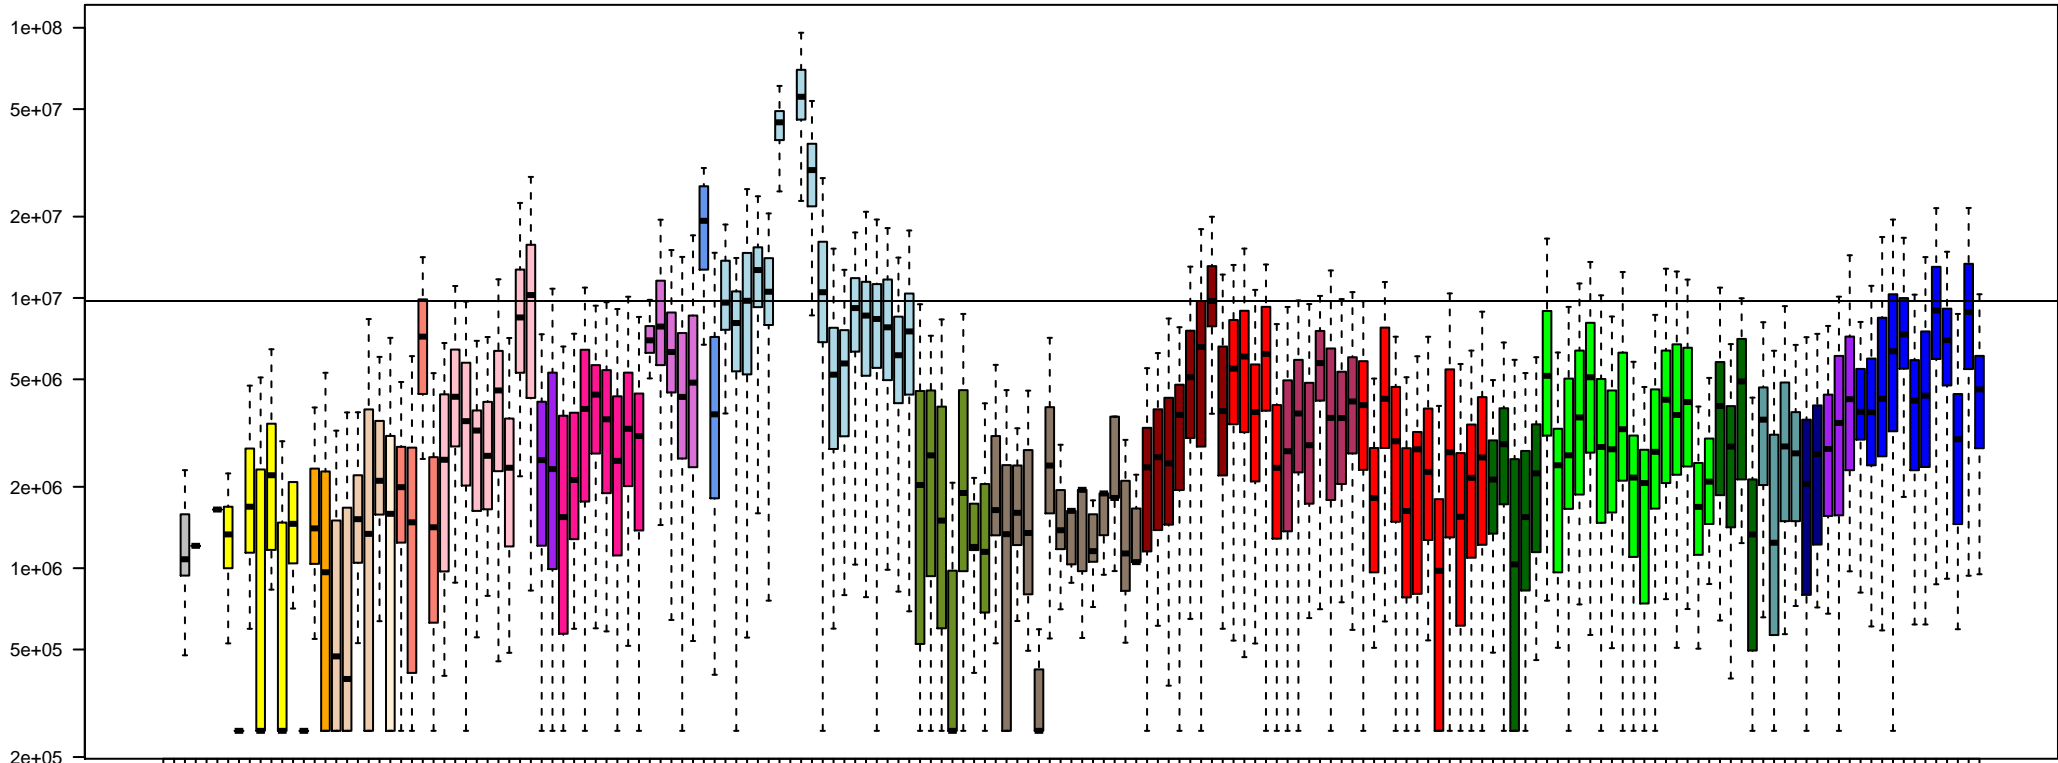

Y-axis labels: 2e+05, 5e+05, 1e+06, 2e+06, 5e+06, 1e+07, 2e+07, 5e+07, 1e+08

X-axis labels: A series of small, illegible text labels, likely representing individual data points or categories, located below the plot area.

# Borzoï

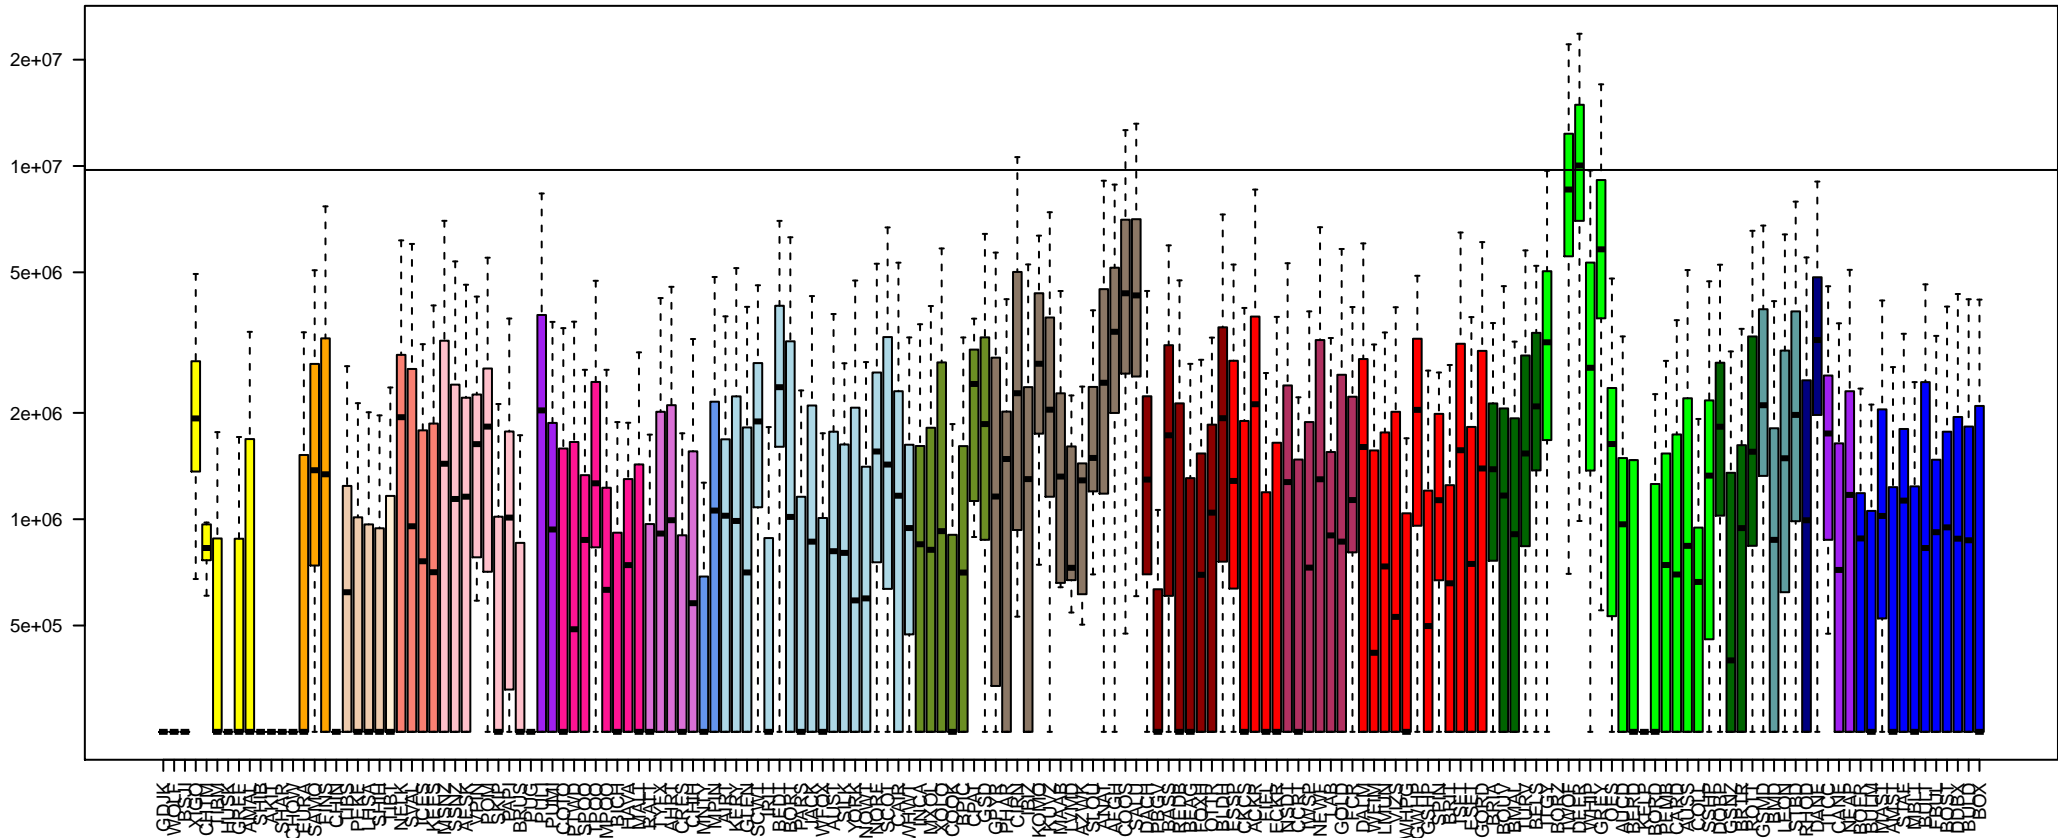

# Boston Terrier

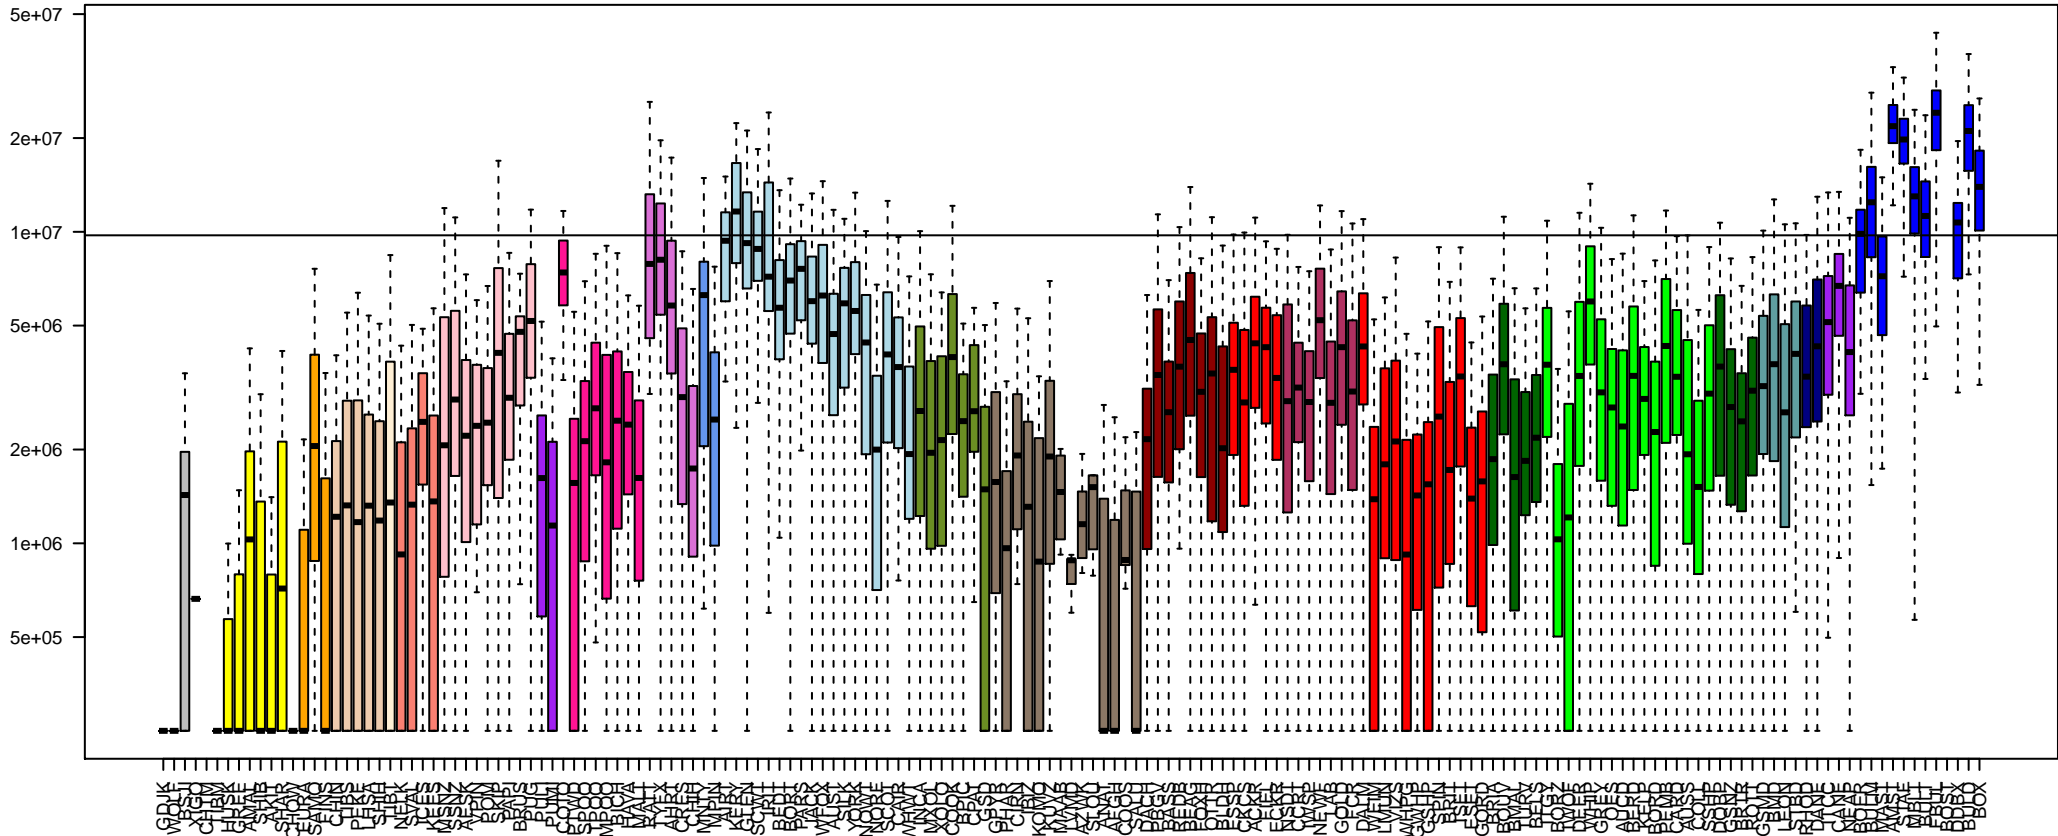



# Bouvier des Flandres

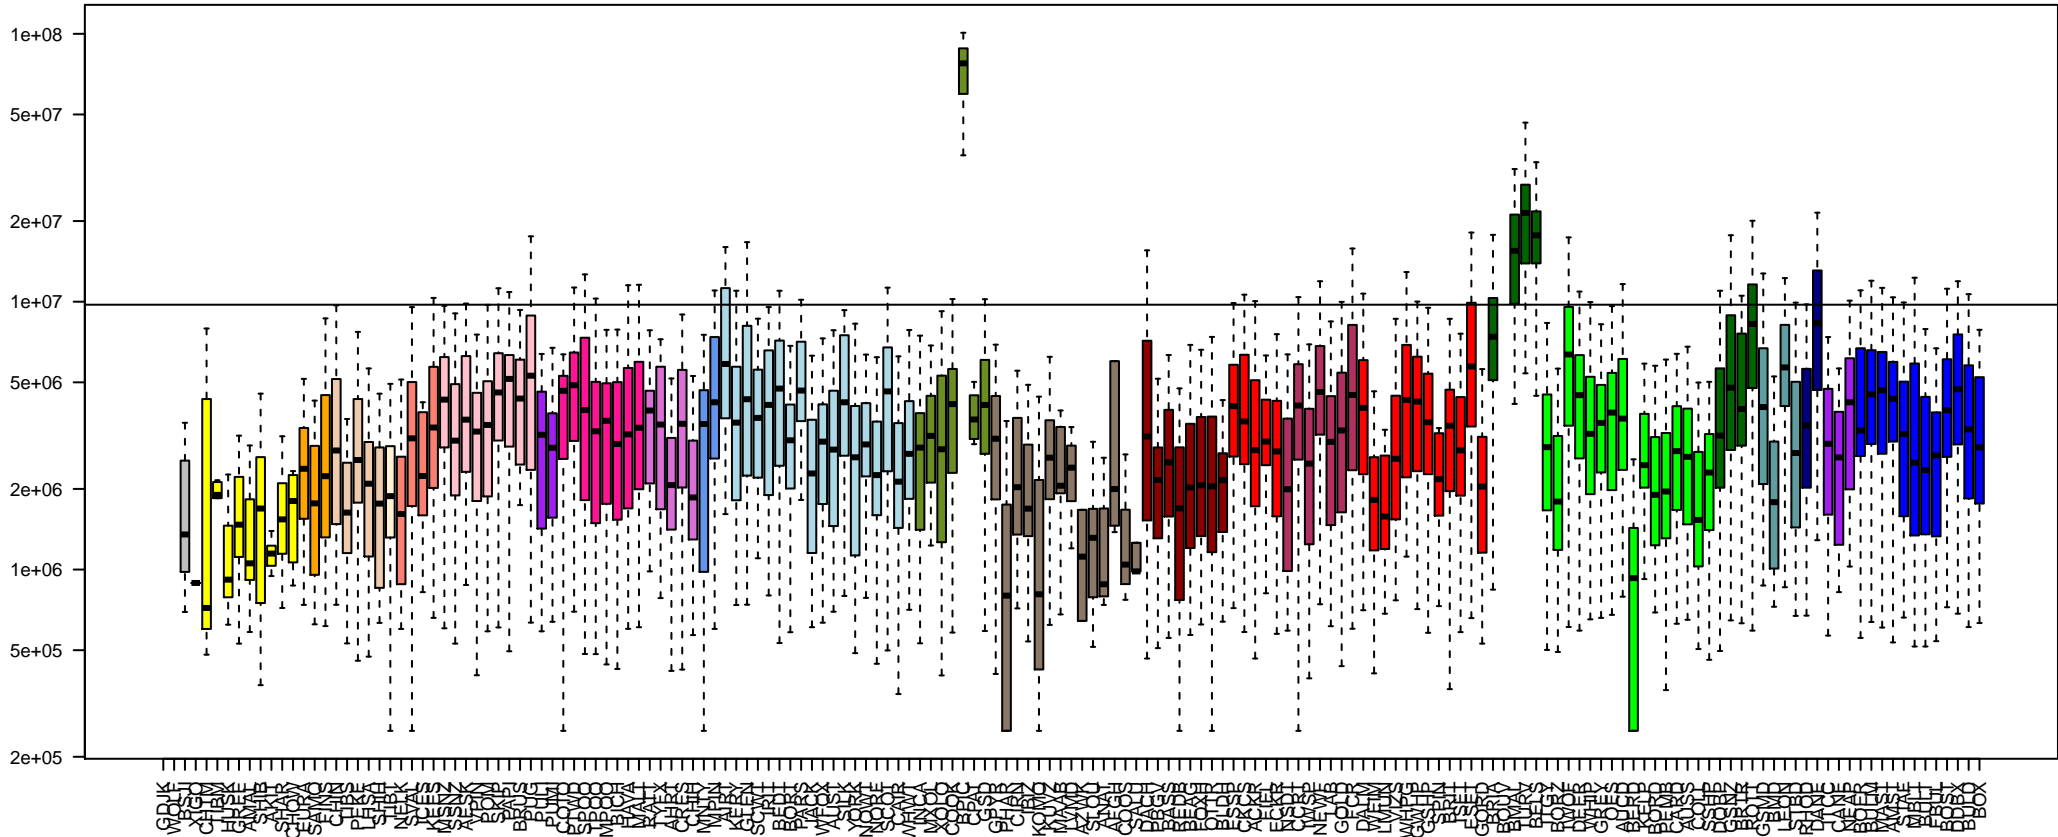

# Boxer

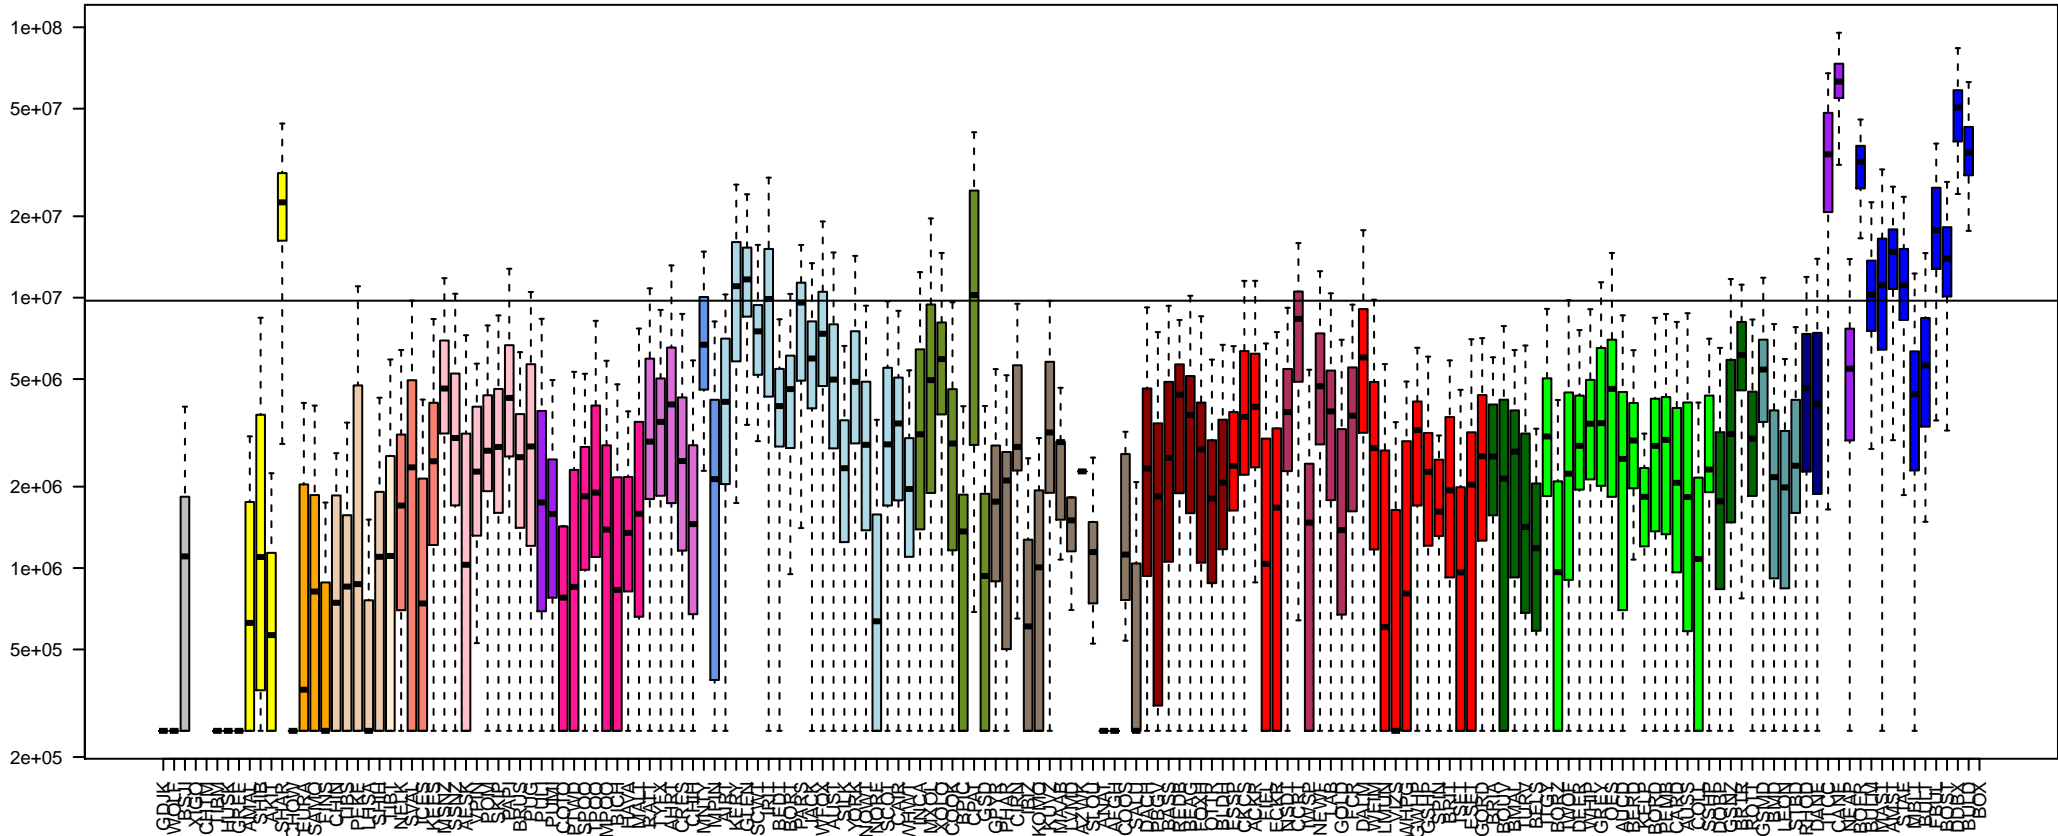

# Briard

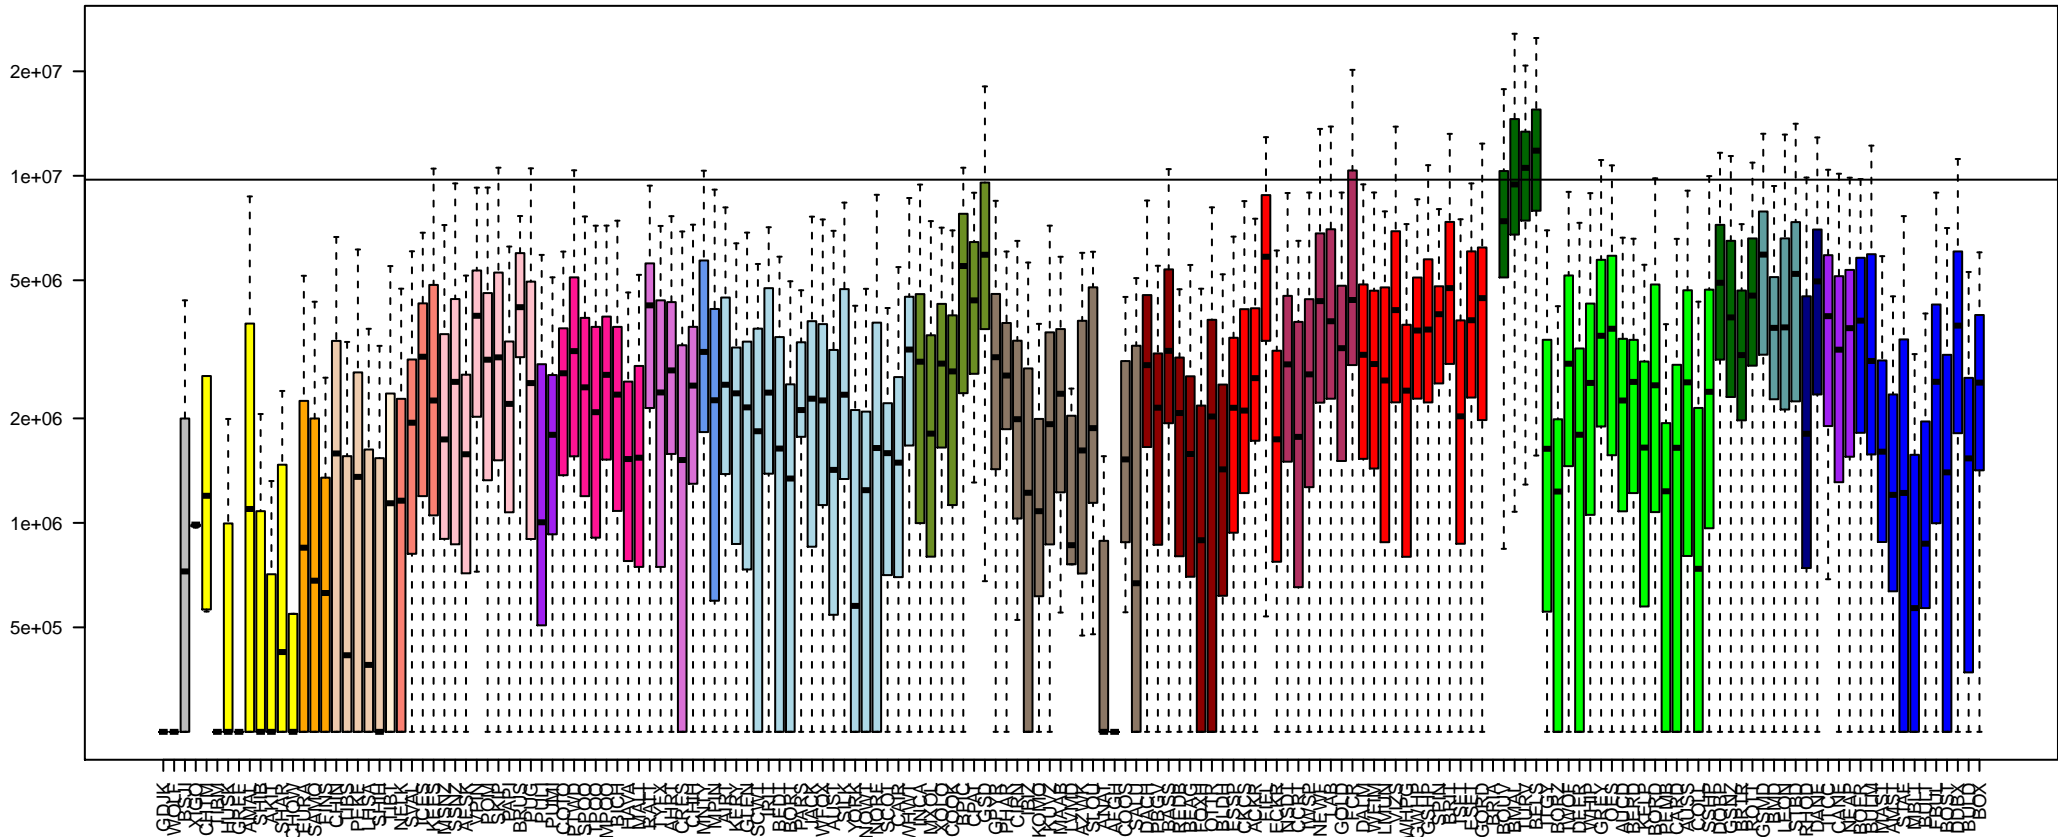

# Brittany

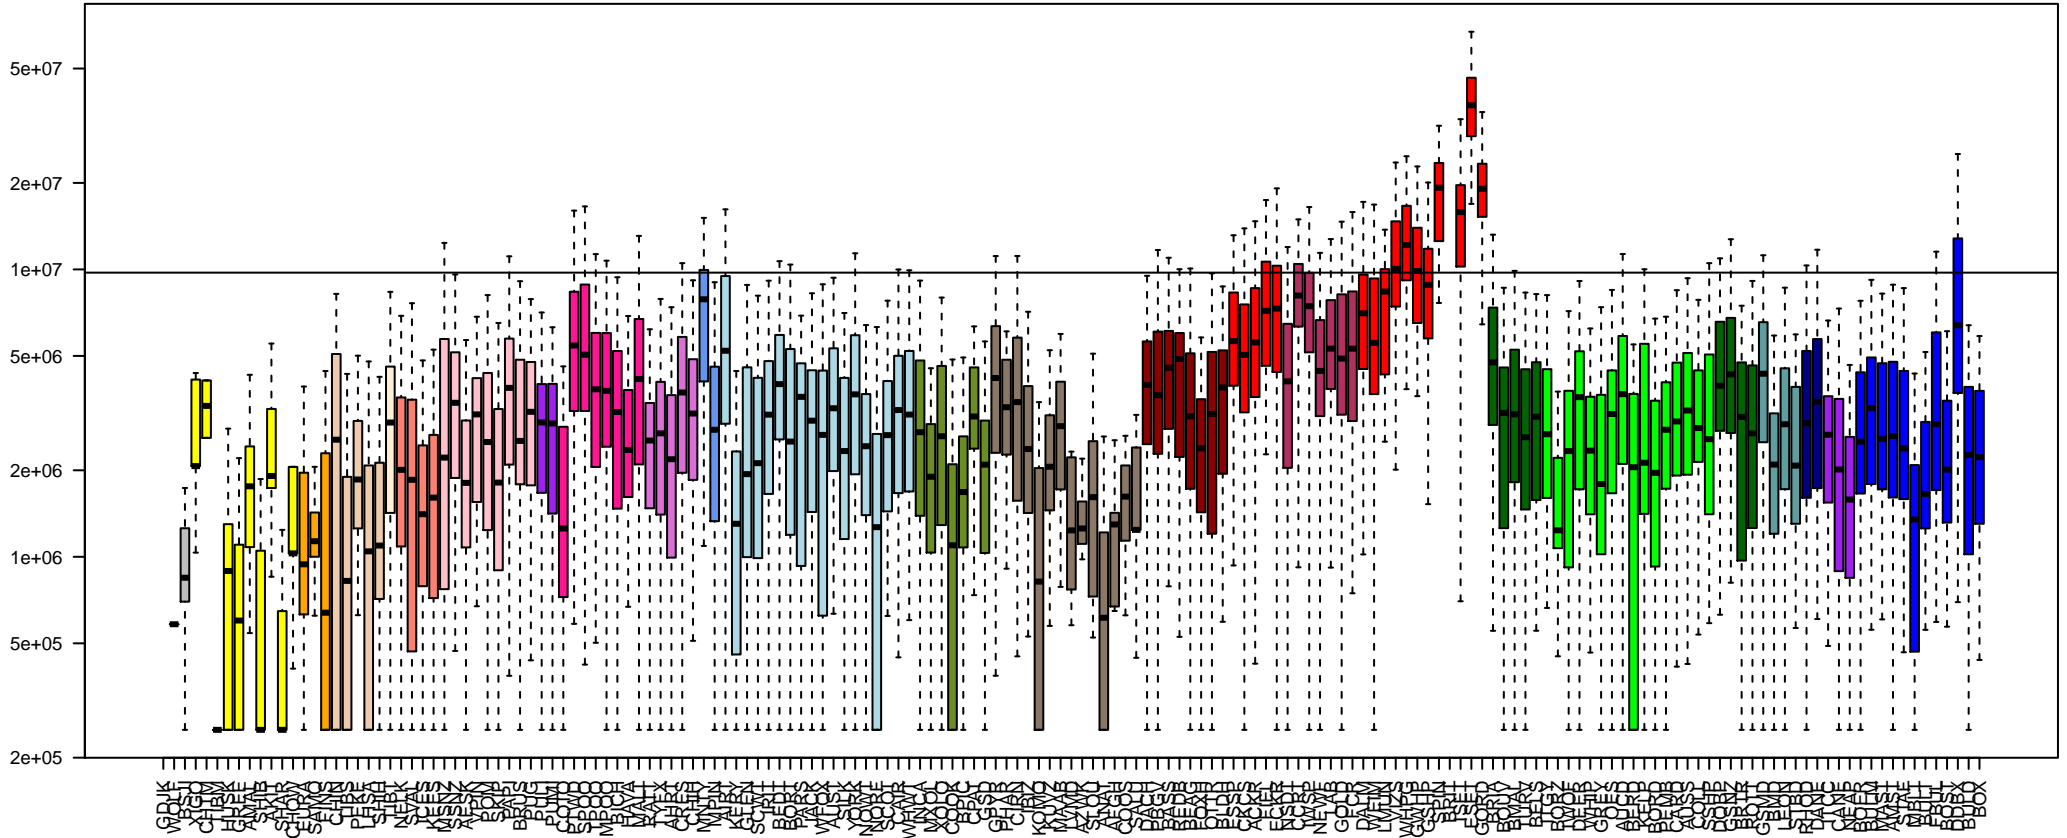

# Brussels Griffon

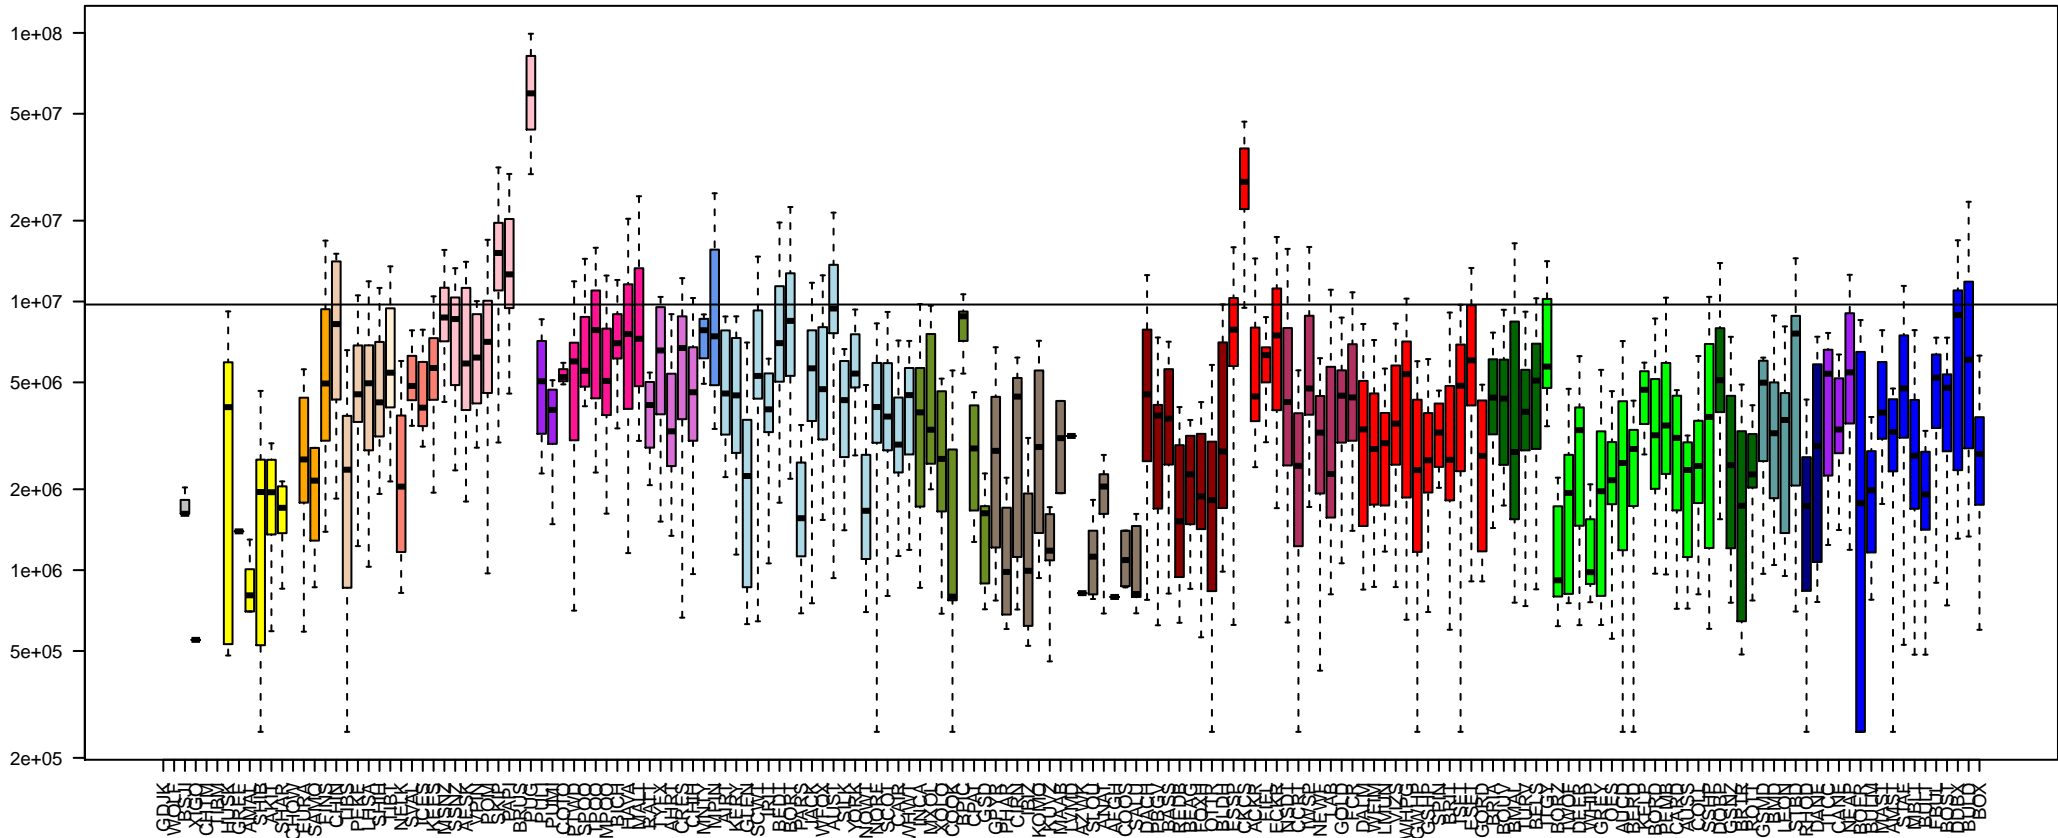

# Bull Terrier

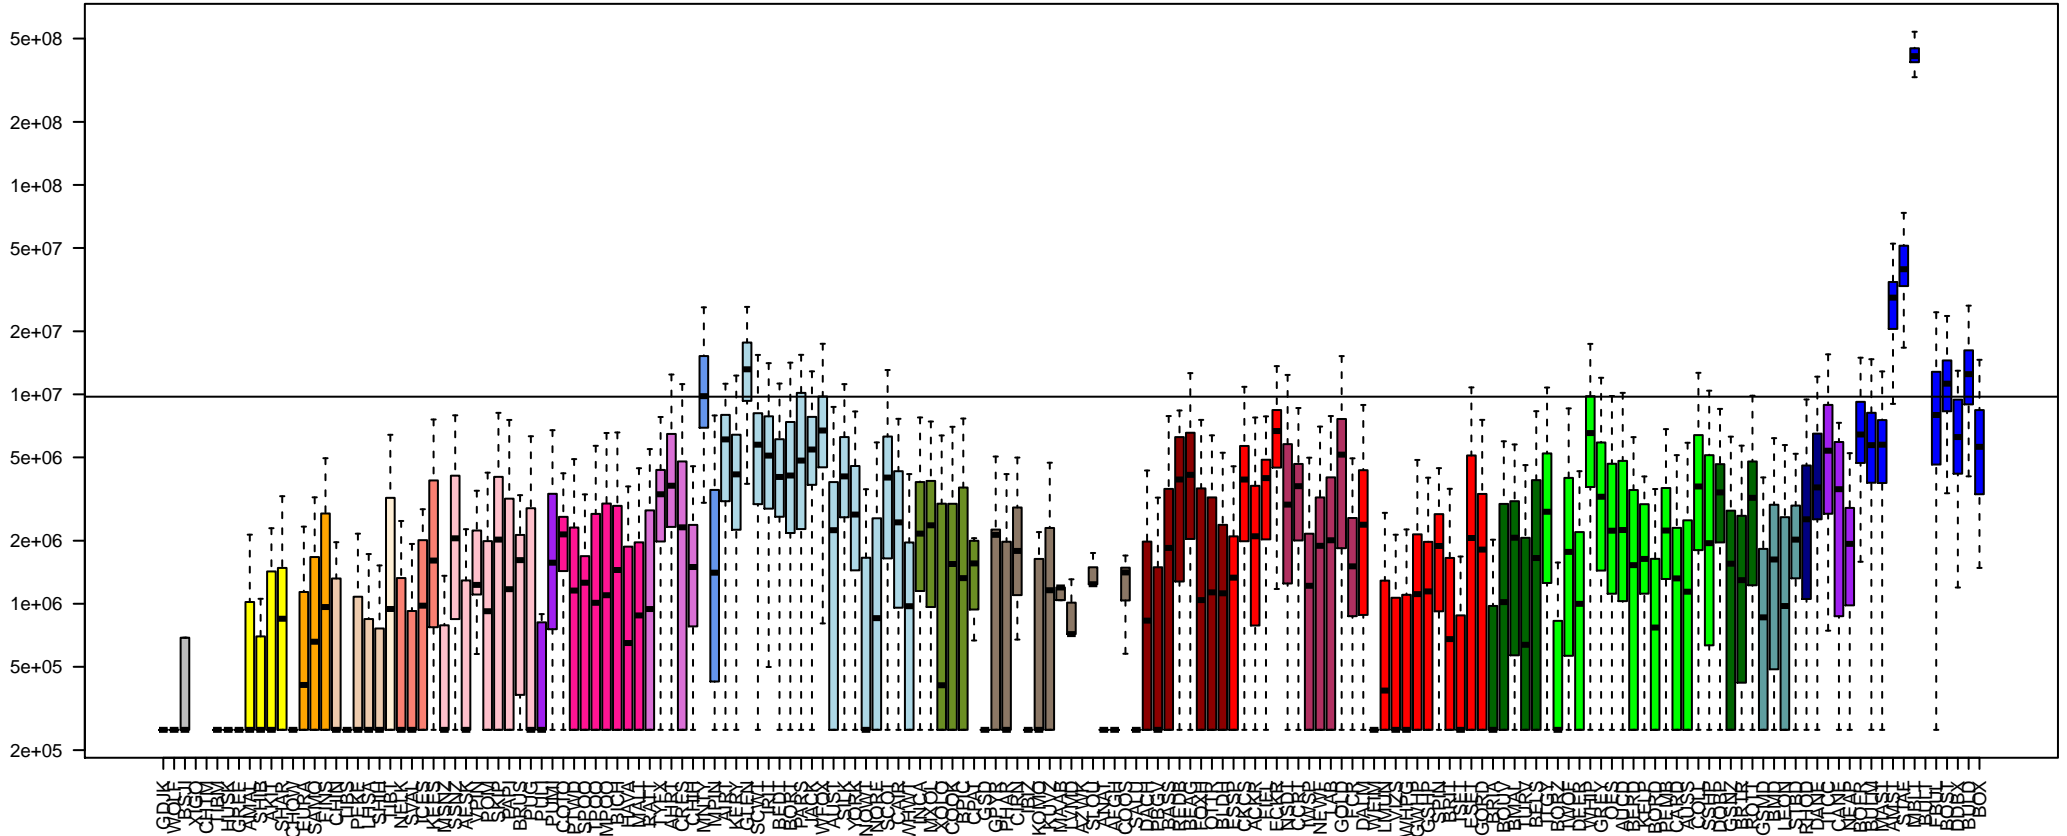

# Bulldog

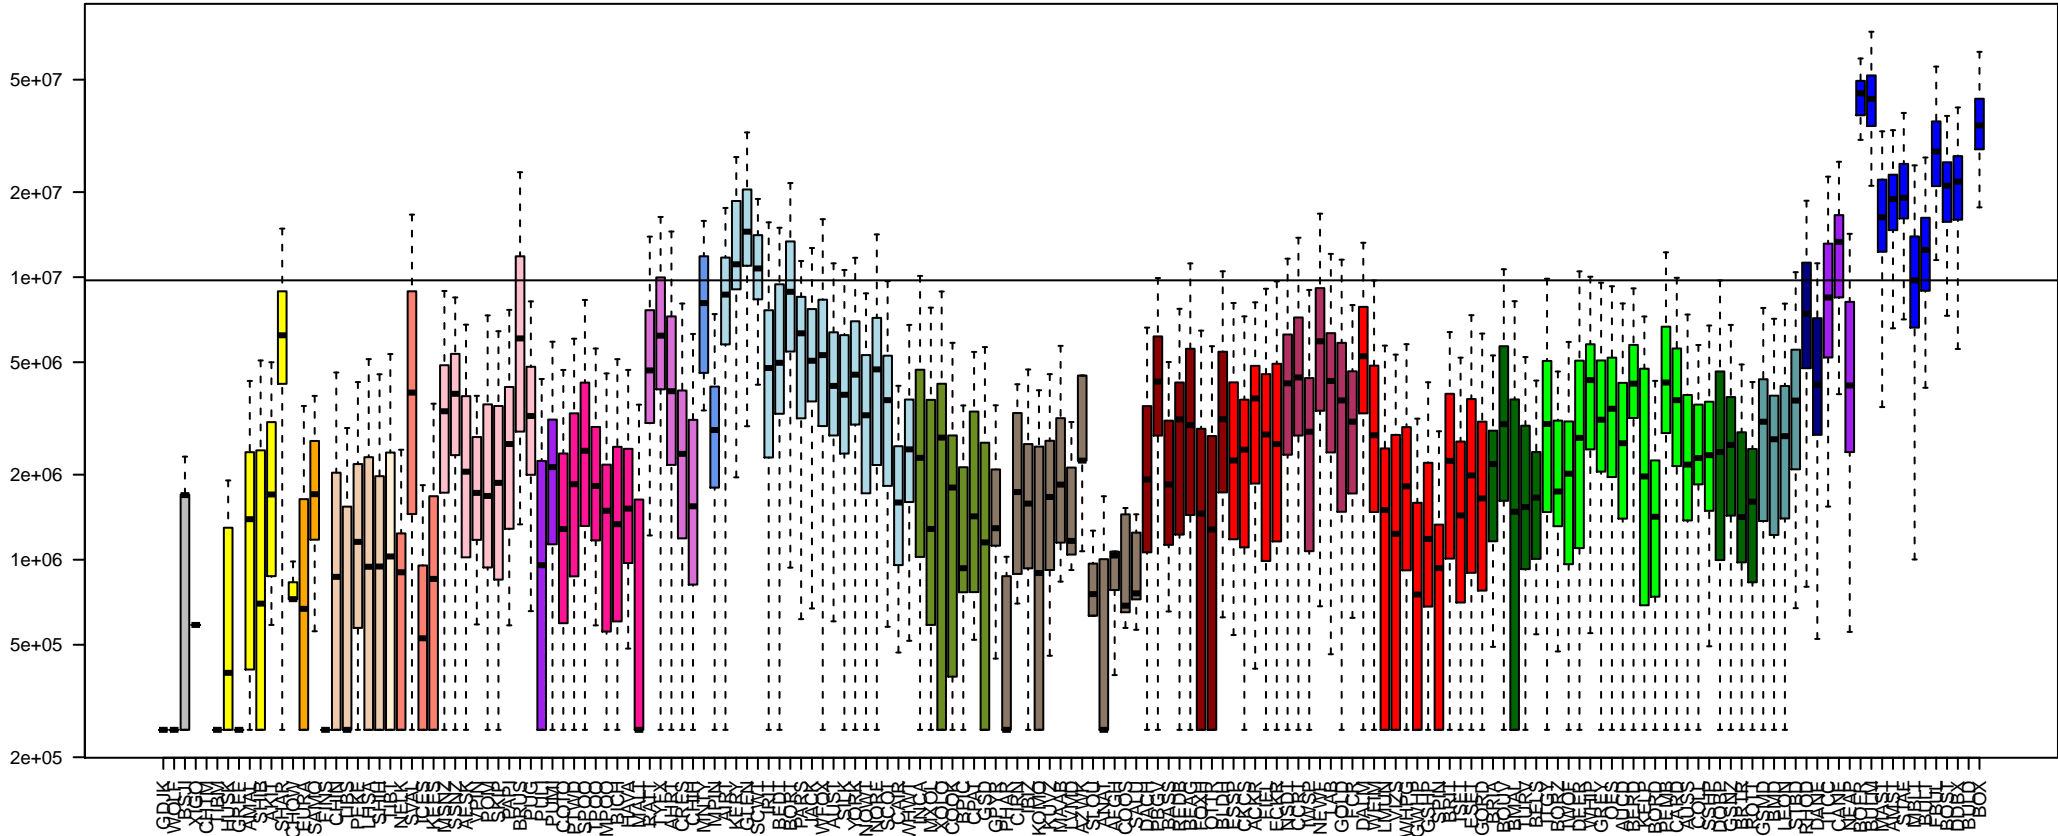

# Bullmastiff

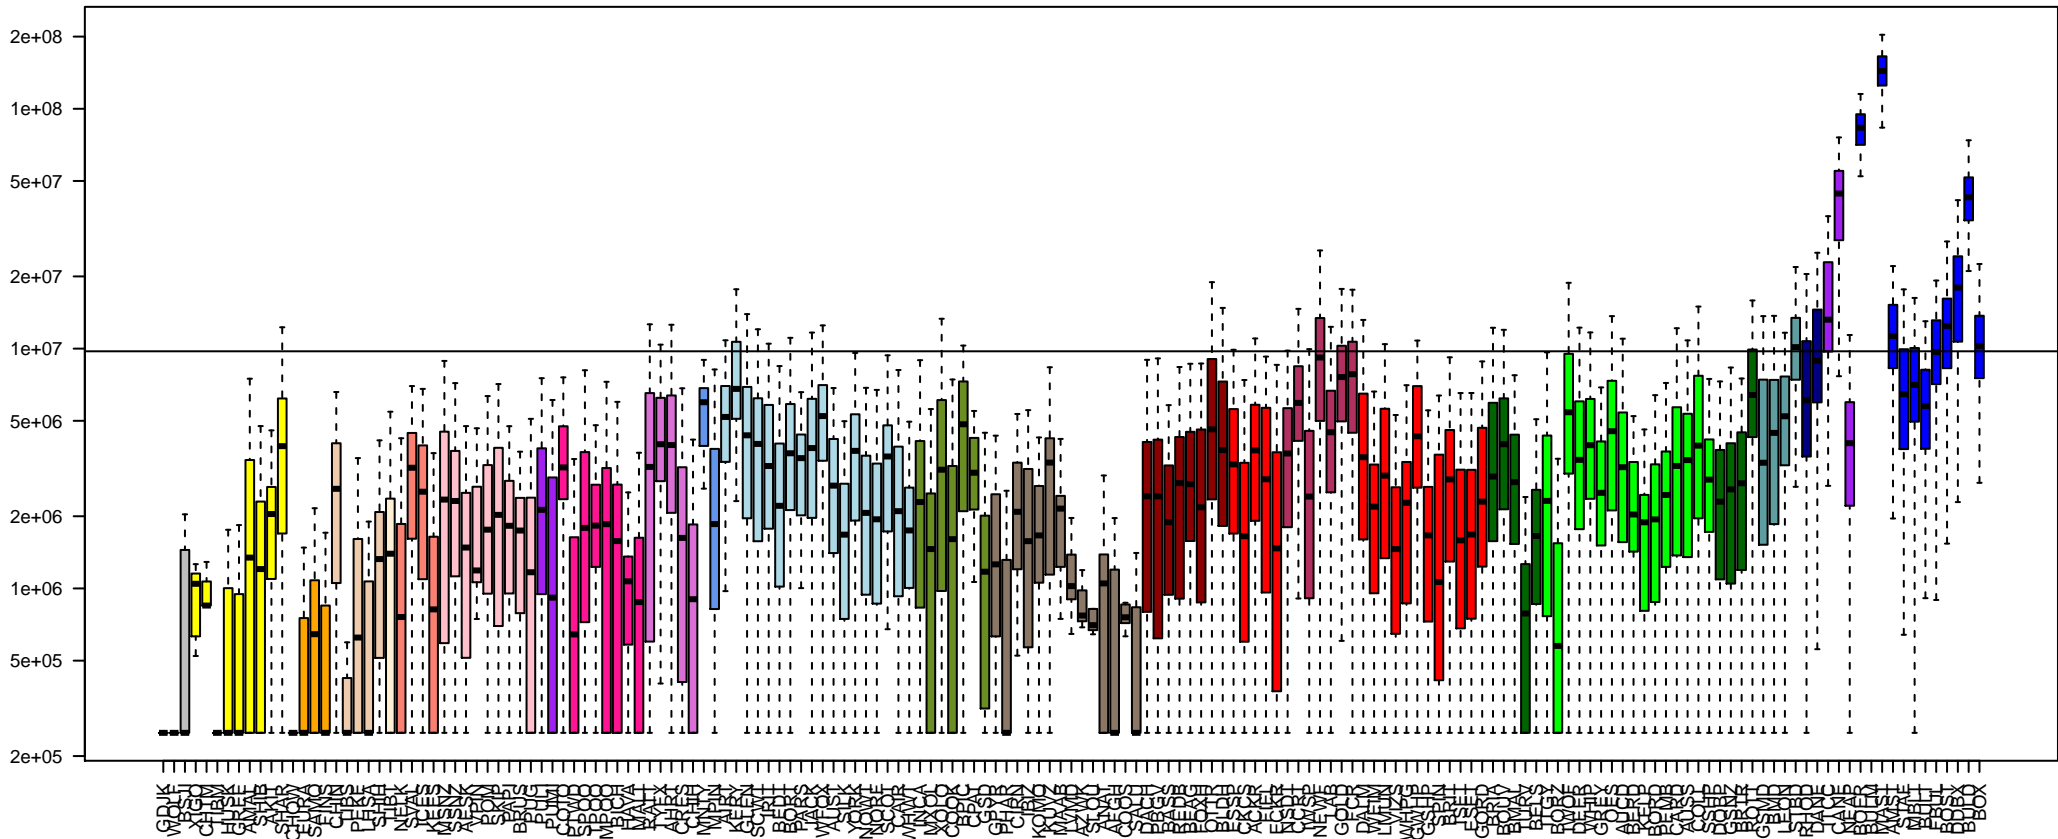



# Cairn Terrier

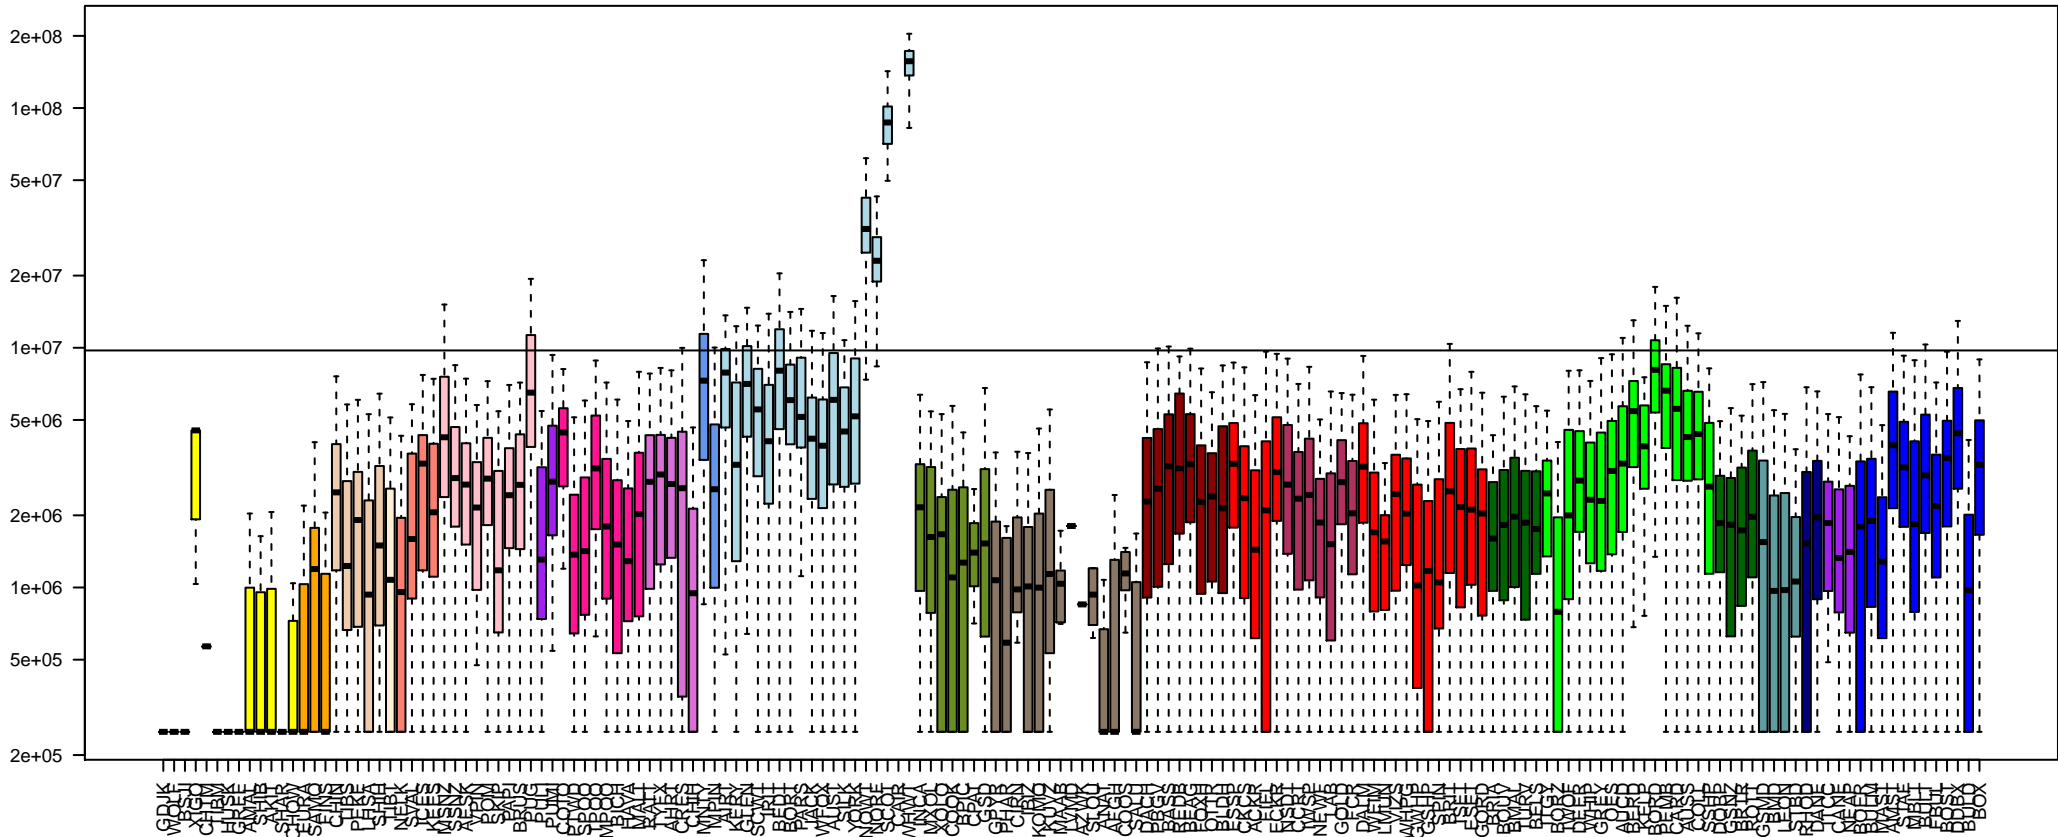



# Cane Corso – North American

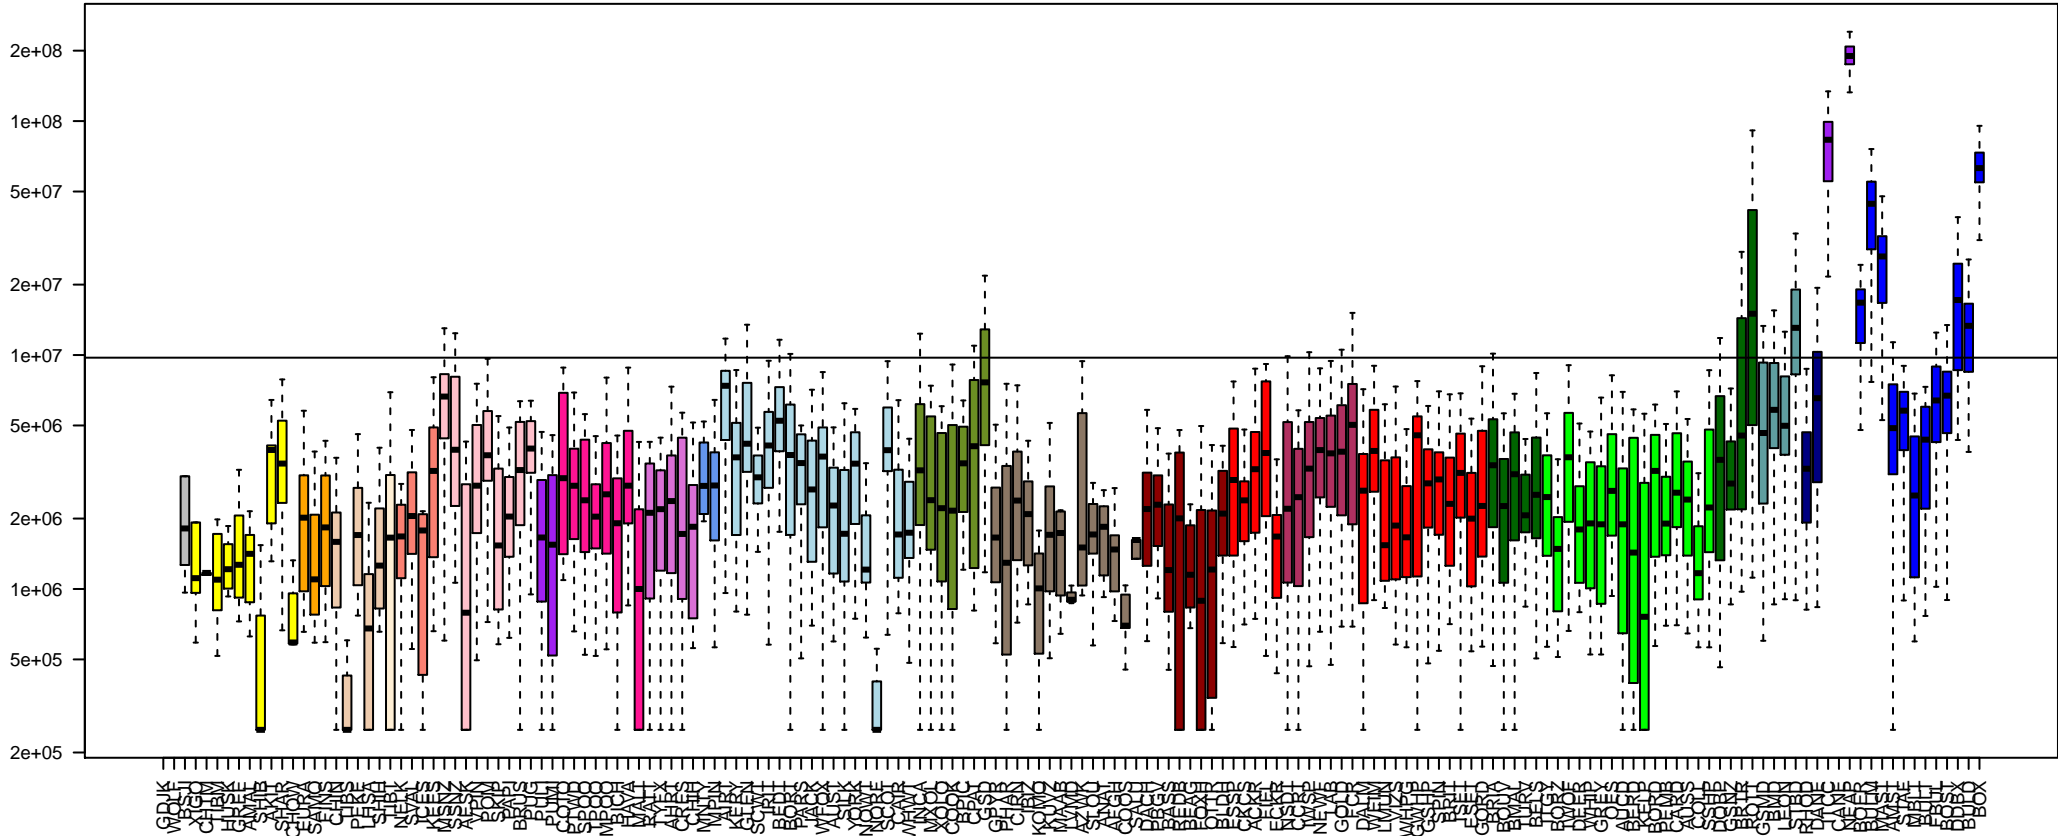

# Cane Paratore

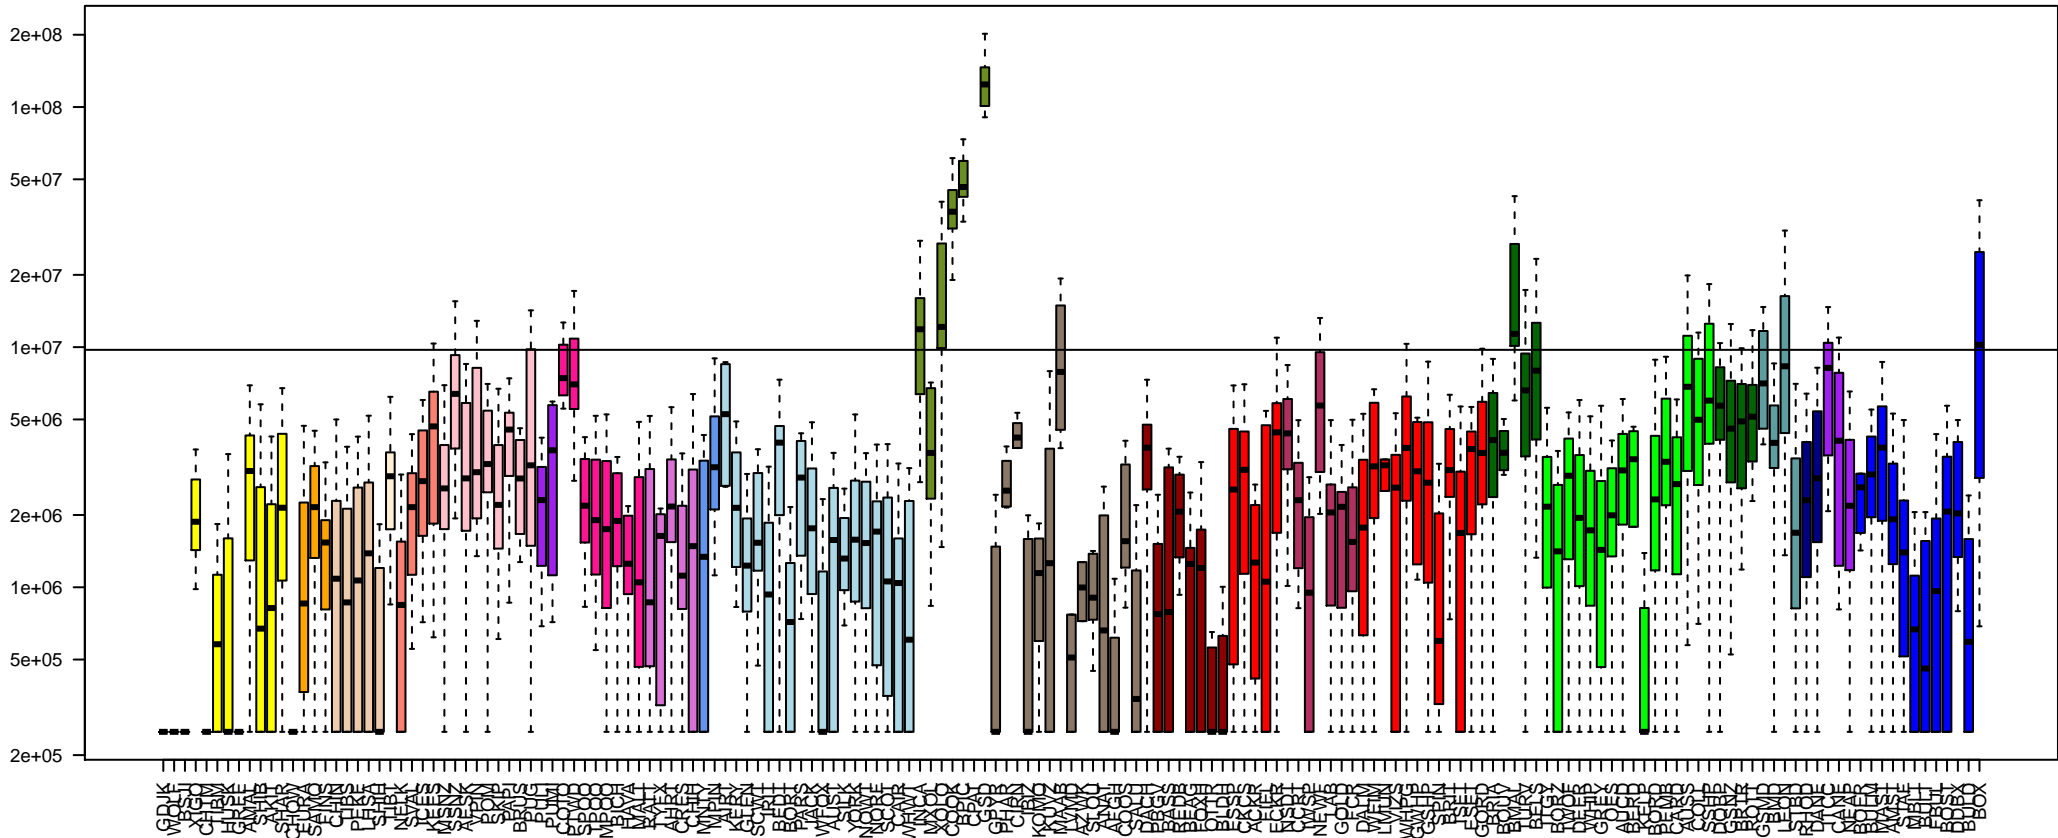



# Cavalier King Charles Spaniel

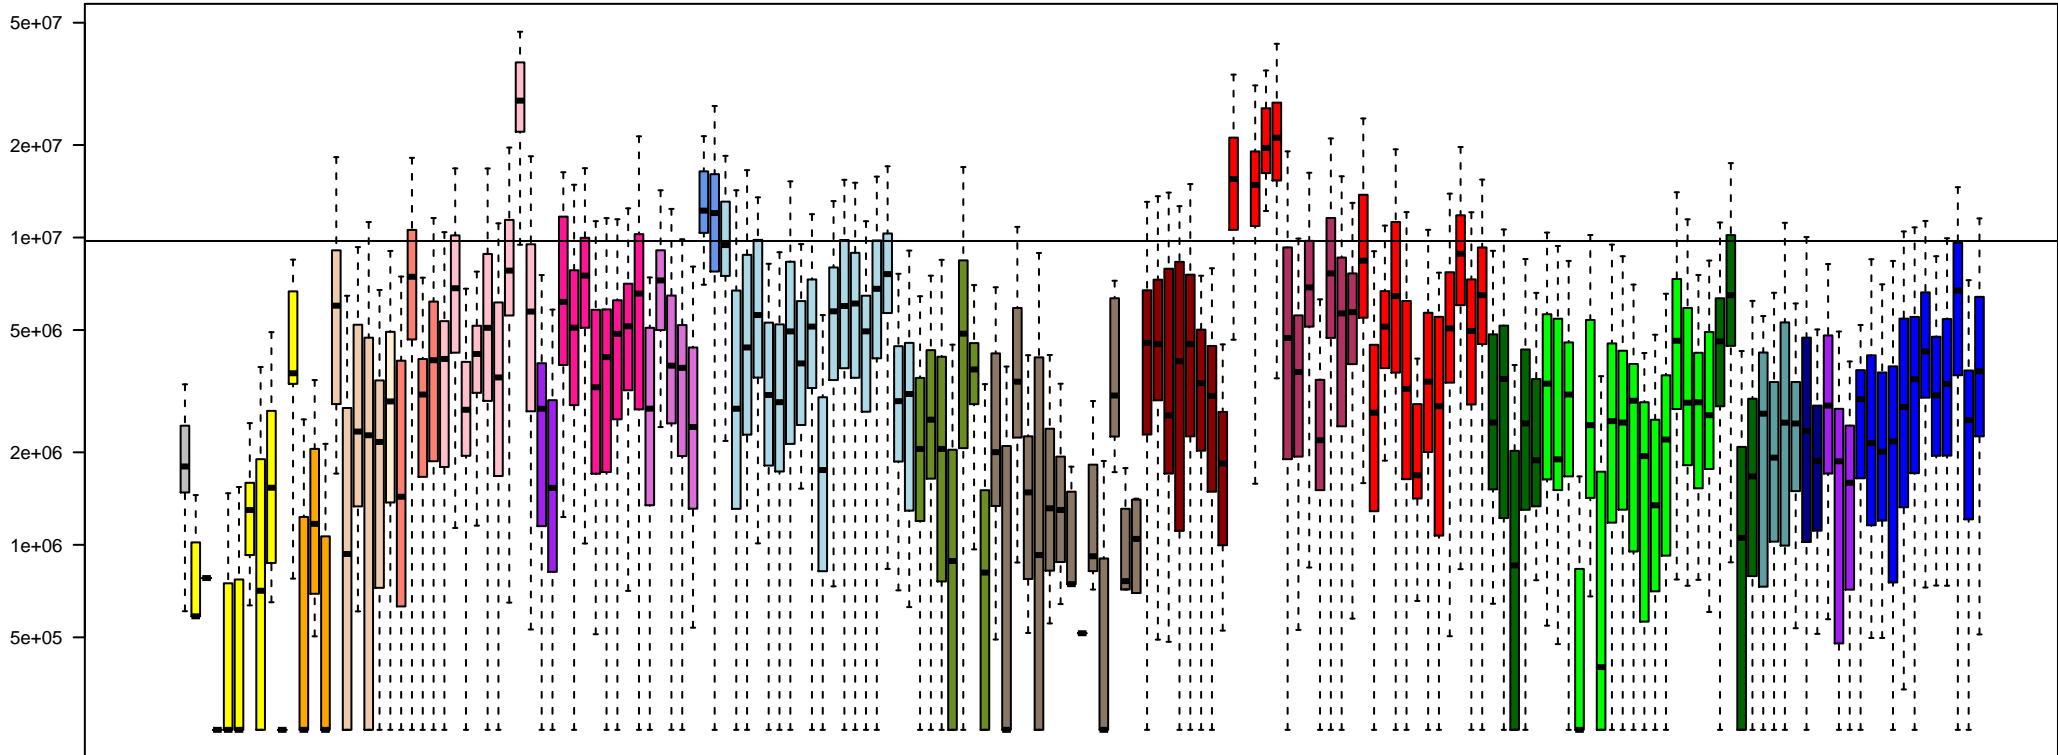

100 categories of data, likely representing different genetic markers or traits, are listed along the x-axis. The labels are small and rotated for readability.

# Chihuahua

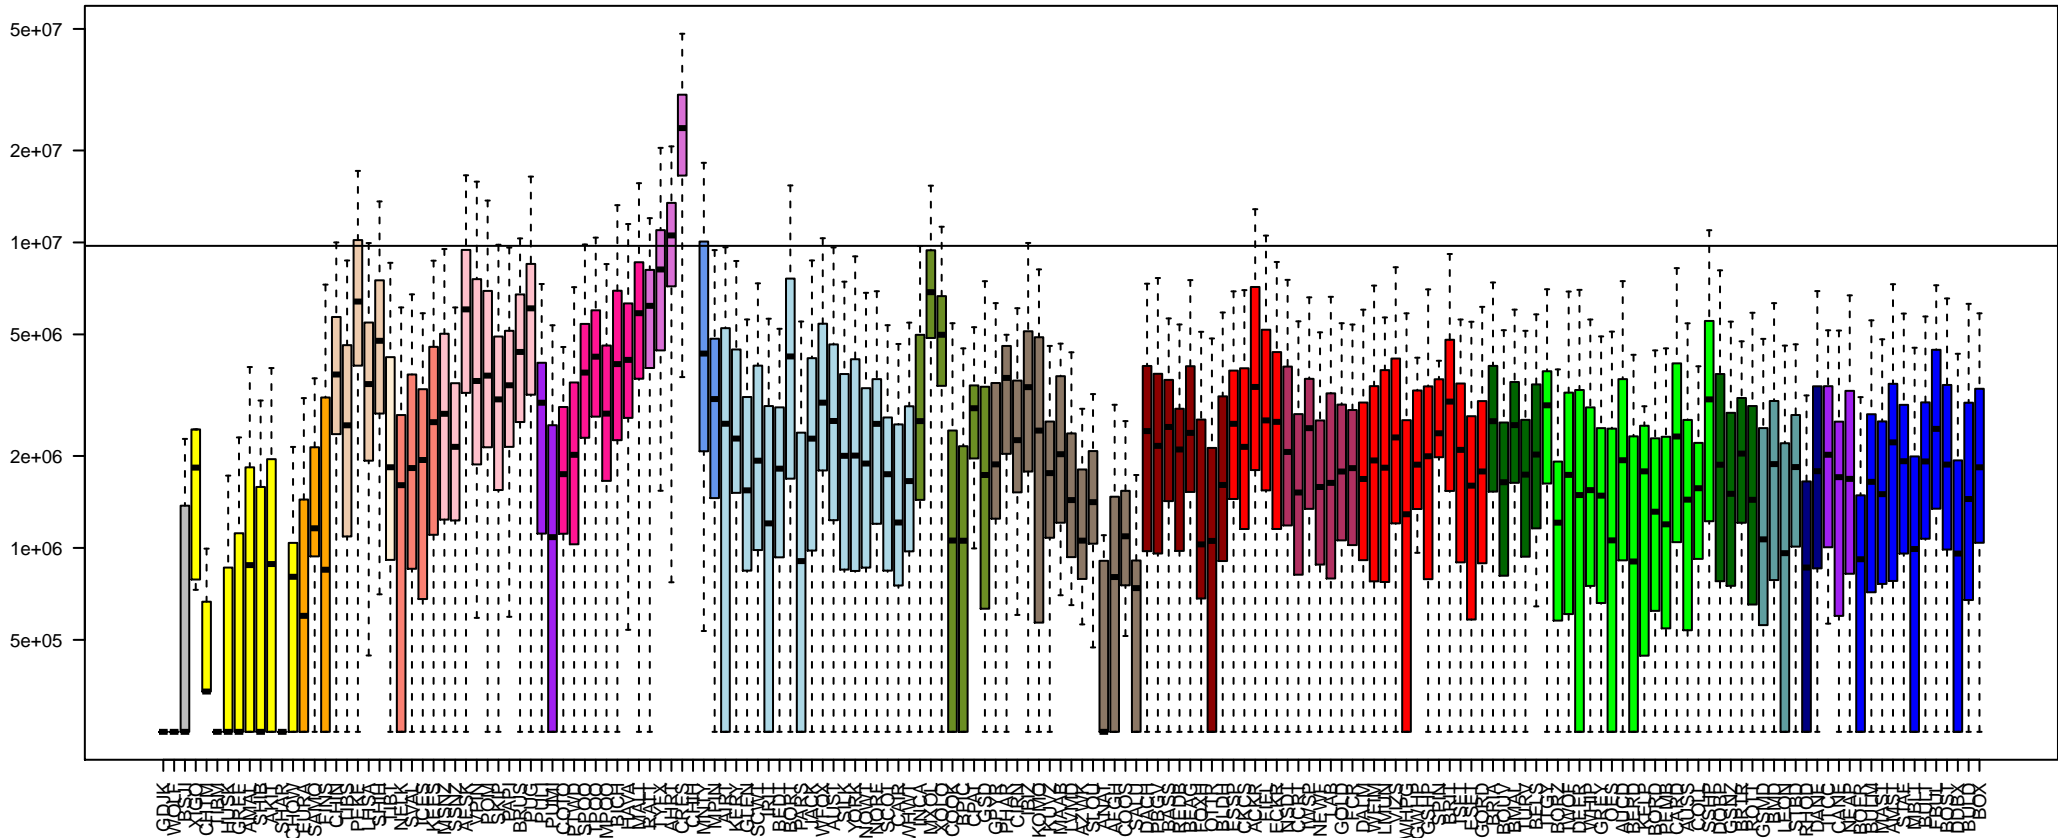

# Chinese Crested

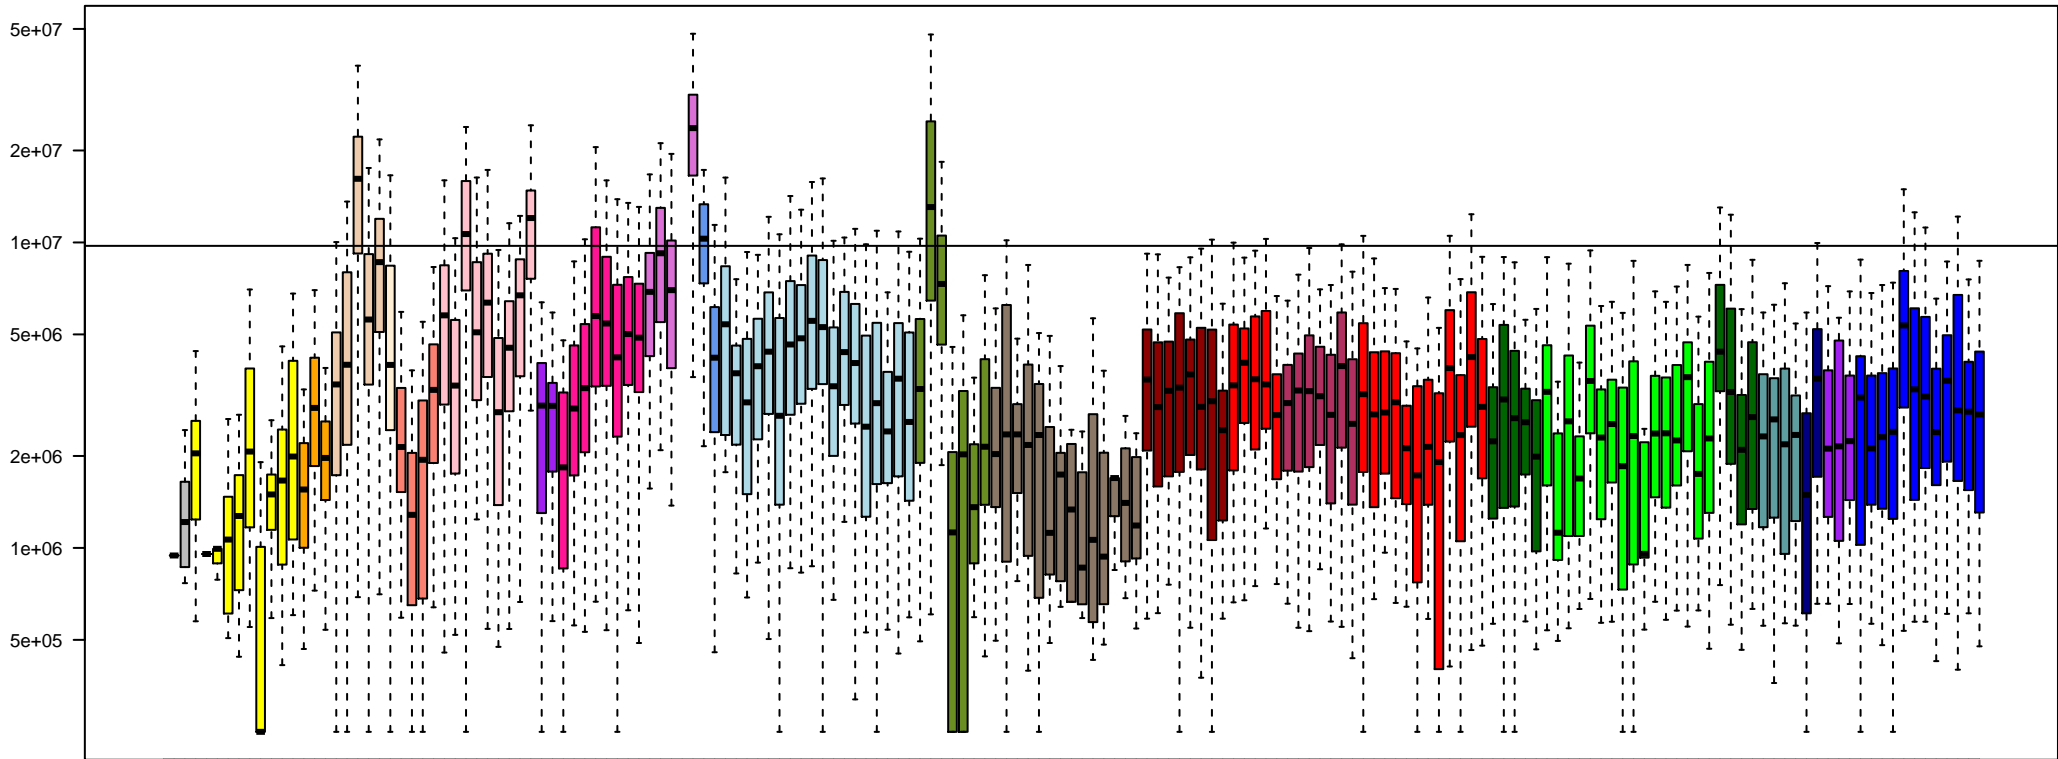

Y  
1/19  
2/19  
3/19  
4/19  
5/19  
6/19  
7/19  
8/19  
9/19  
10/19  
11/19  
12/19  
13/19  
14/19  
15/19  
16/19  
17/19  
18/19  
19/19  
20/19  
21/19  
22/19  
23/19  
24/19  
25/19  
26/19  
27/19  
28/19  
29/19  
30/19  
31/19  
32/19  
33/19  
34/19  
35/19  
36/19  
37/19  
38/19  
39/19  
40/19  
41/19  
42/19  
43/19  
44/19  
45/19  
46/19  
47/19  
48/19  
49/19  
50/19  
51/19  
52/19  
53/19  
54/19  
55/19  
56/19  
57/19  
58/19  
59/19  
60/19  
61/19  
62/19  
63/19  
64/19  
65/19  
66/19  
67/19  
68/19  
69/19  
70/19  
71/19  
72/19  
73/19  
74/19  
75/19  
76/19  
77/19  
78/19  
79/19  
80/19  
81/19  
82/19  
83/19  
84/19  
85/19  
86/19  
87/19  
88/19  
89/19  
90/19  
91/19  
92/19  
93/19  
94/19  
95/19  
96/19  
97/19  
98/19  
99/19  
100/19



# Chinese Shar-Pei

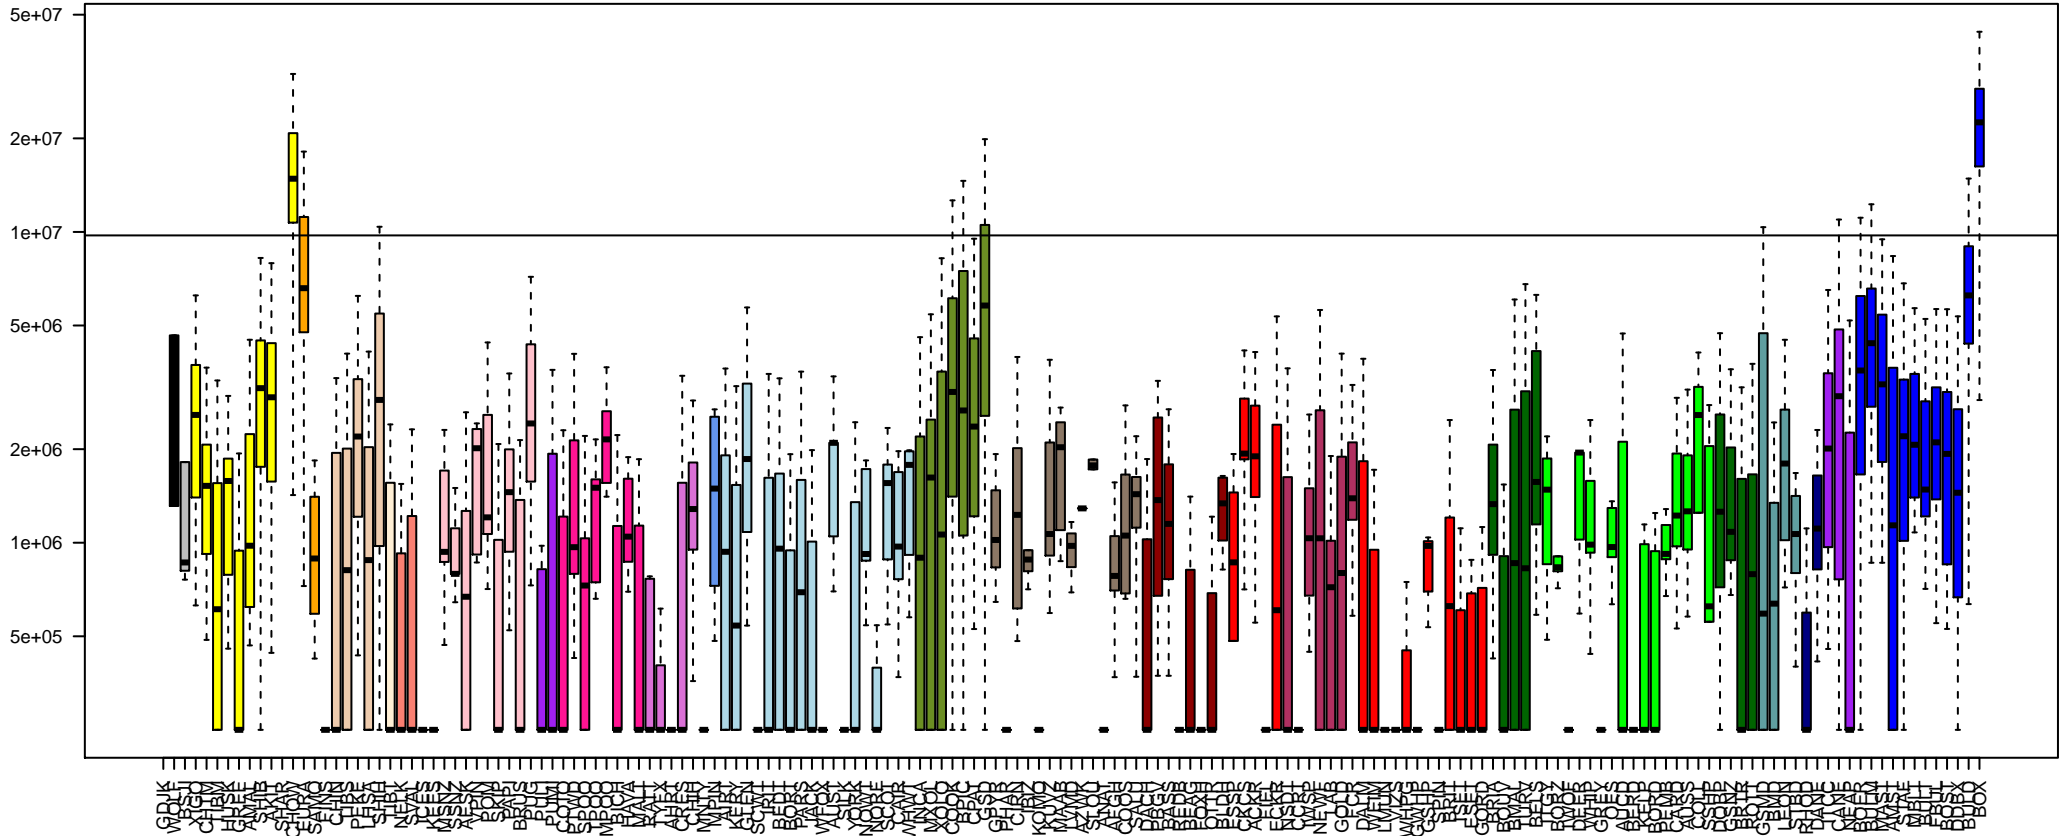

# Chinook

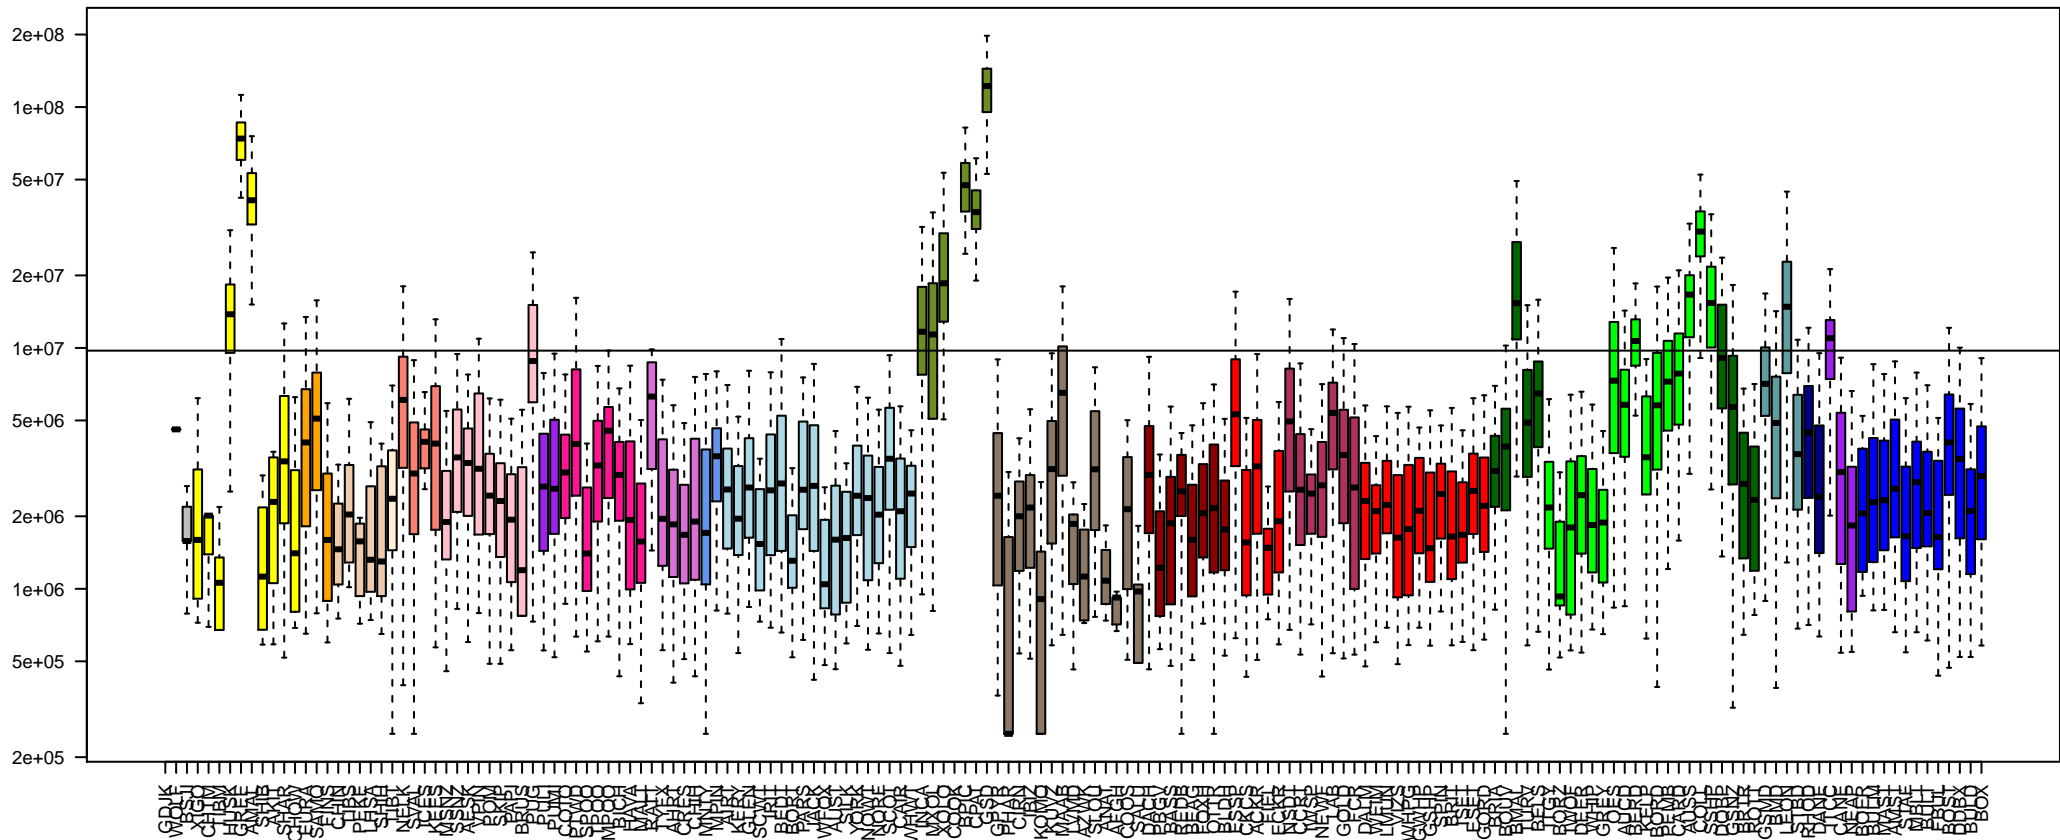



# Circeo dell'Etna

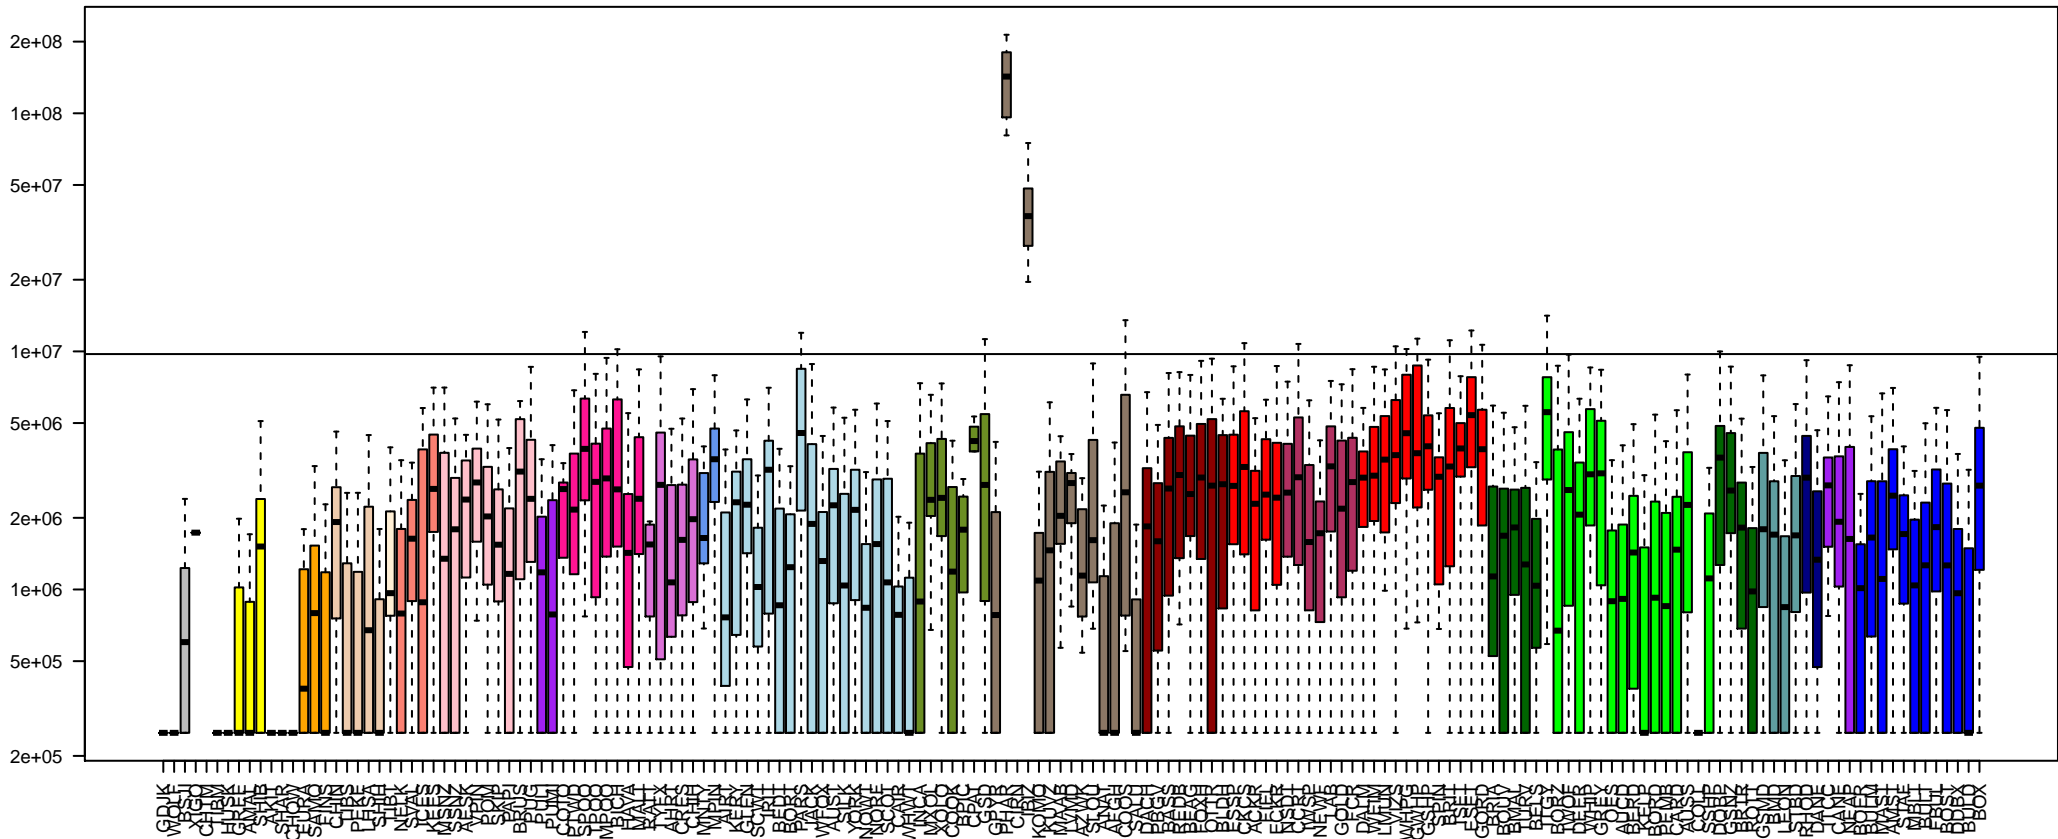





# Curly-Coated Retriever

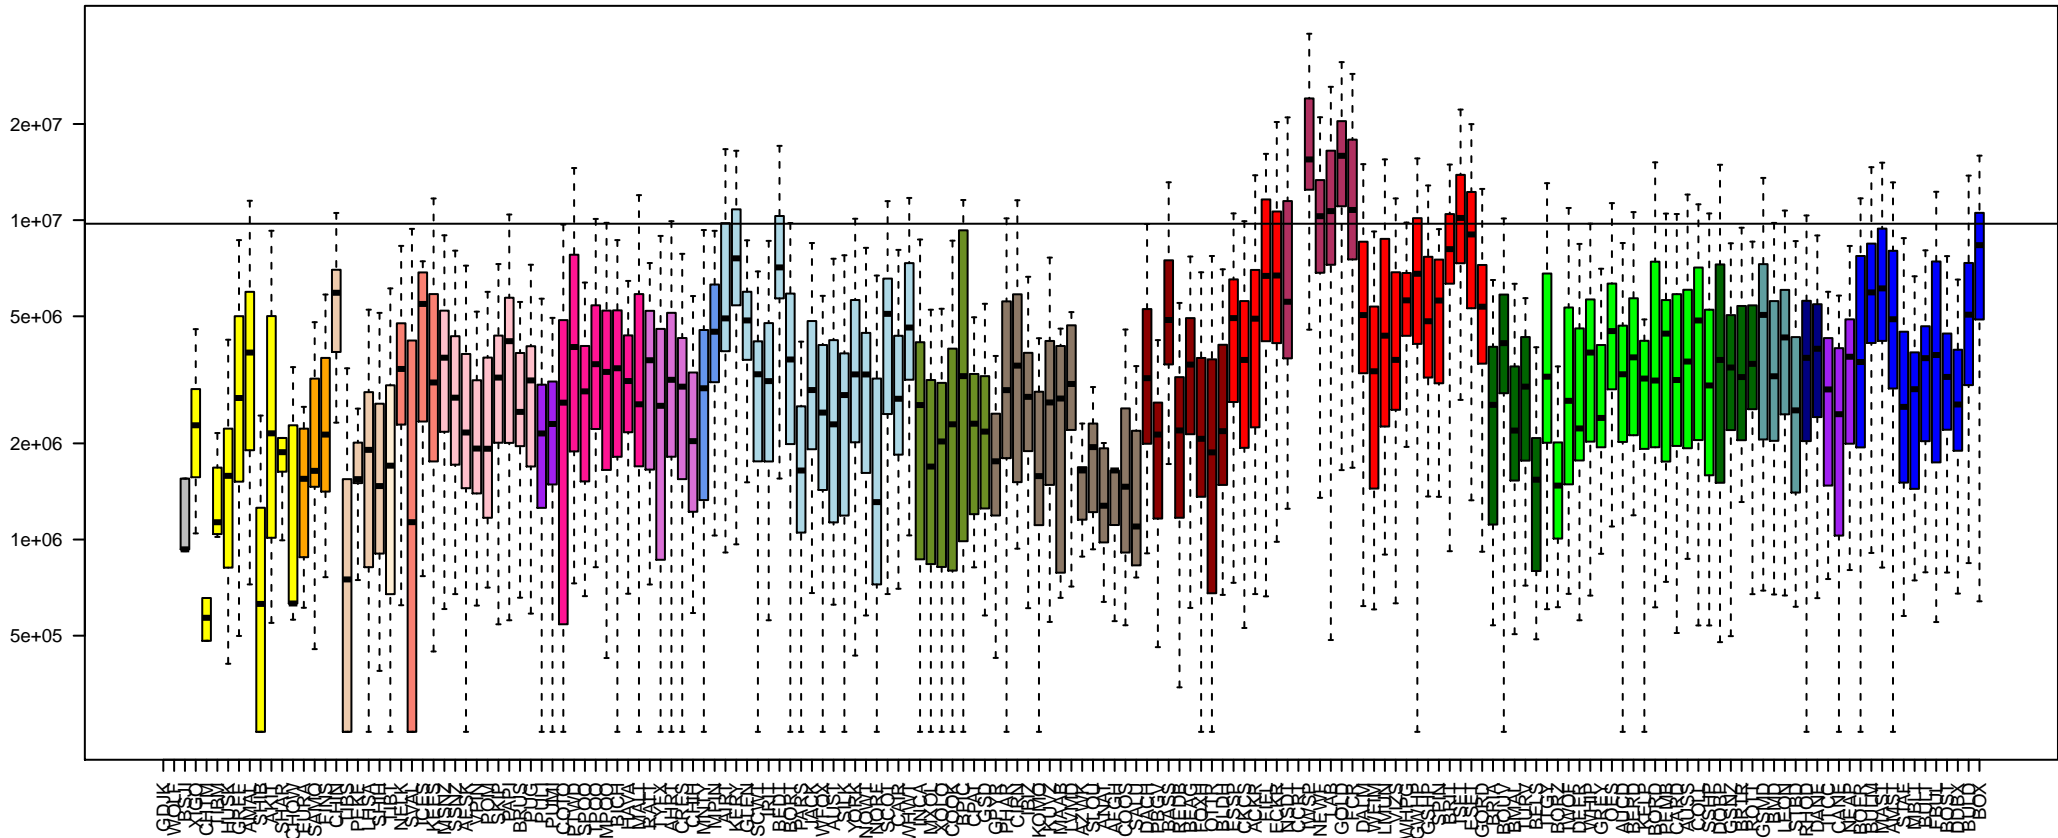









# Dogue de Bordeaux

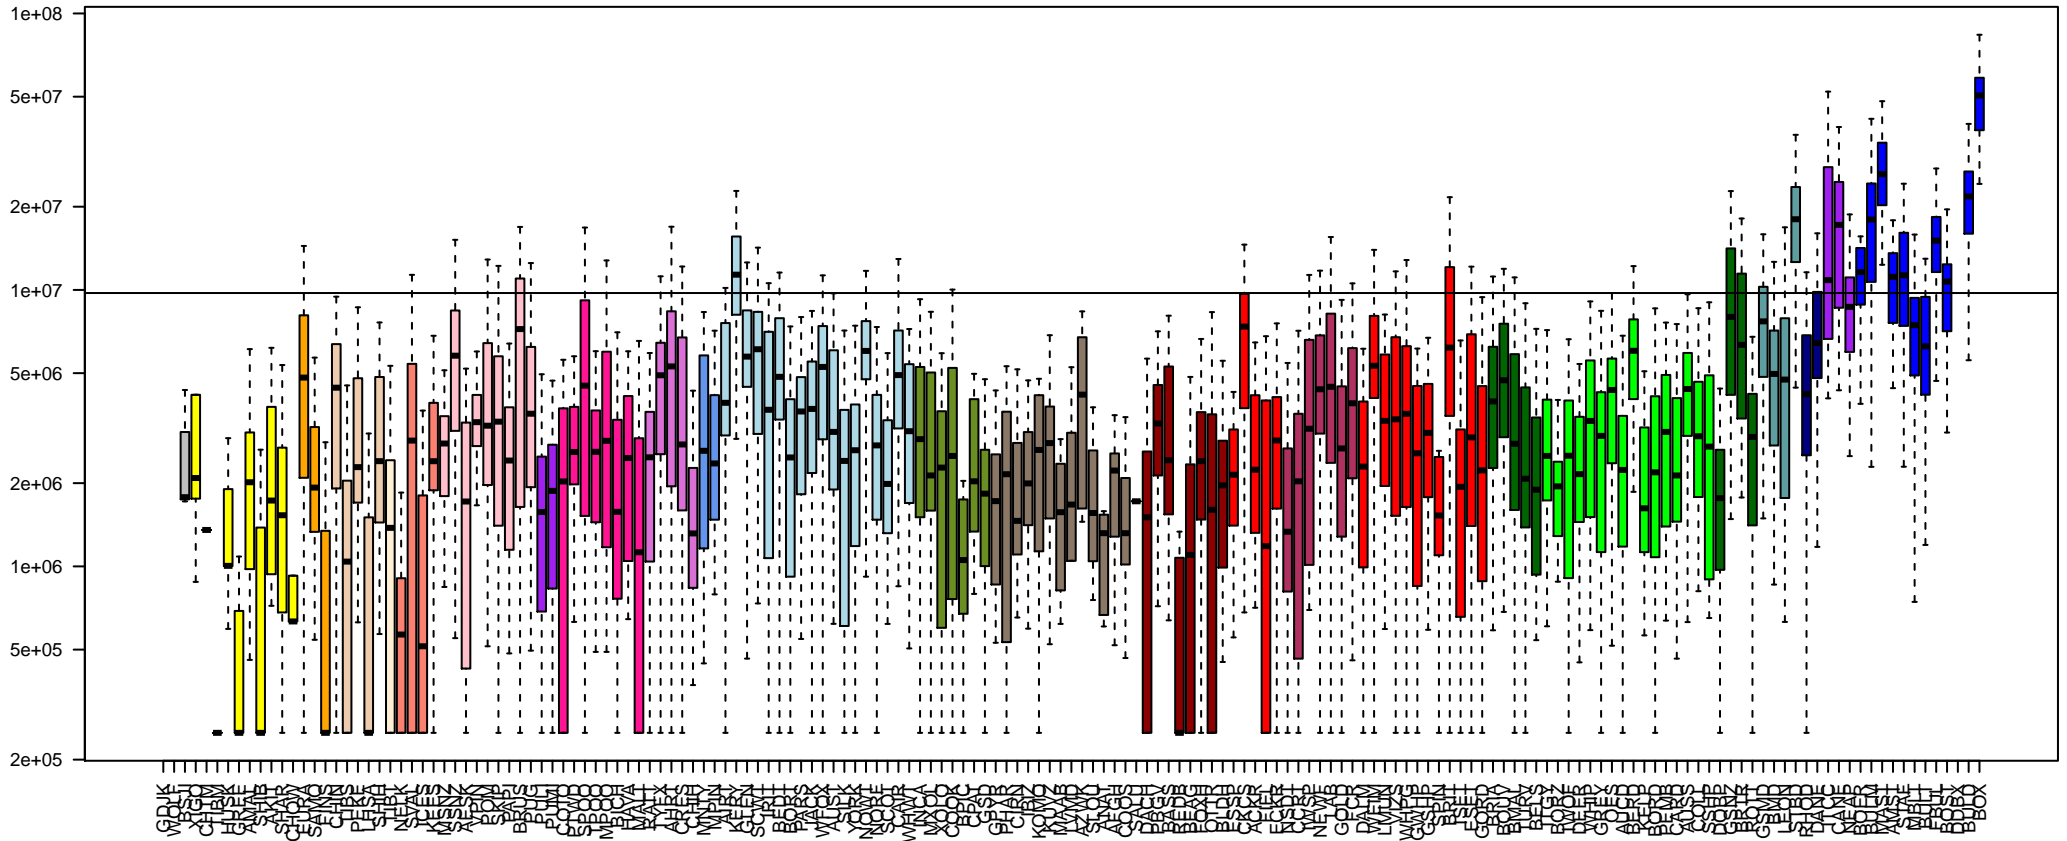

# English Cocker Spaniel

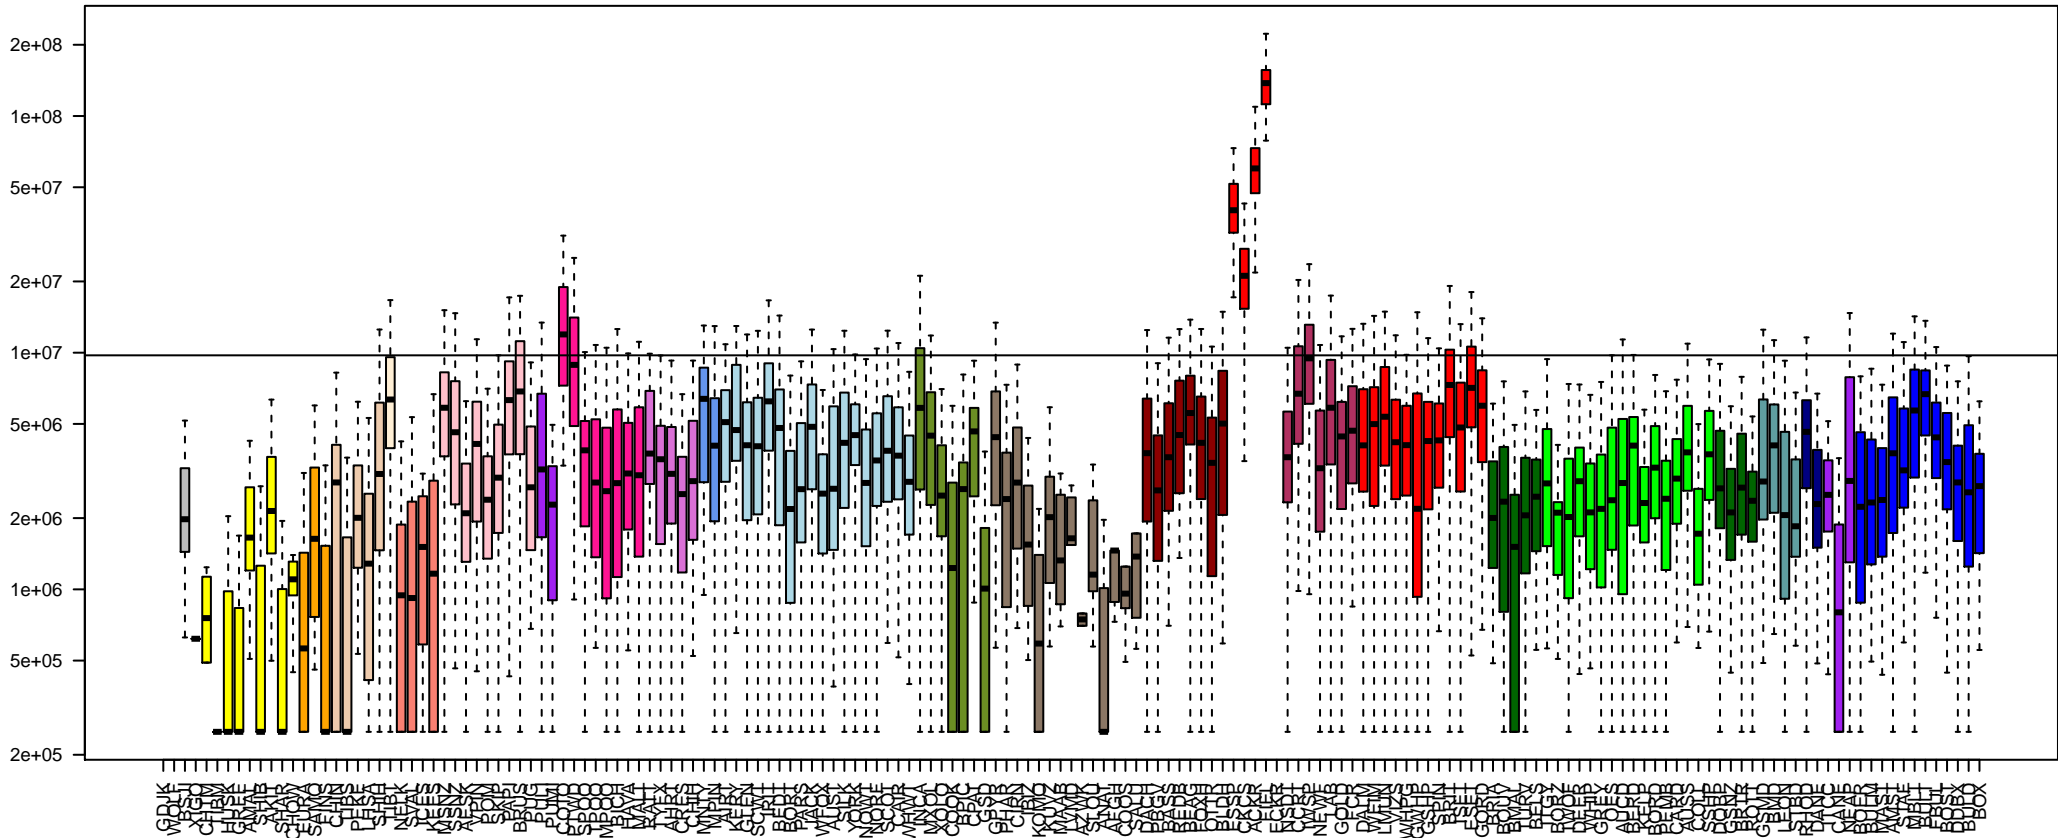



# English Springer Spaniel

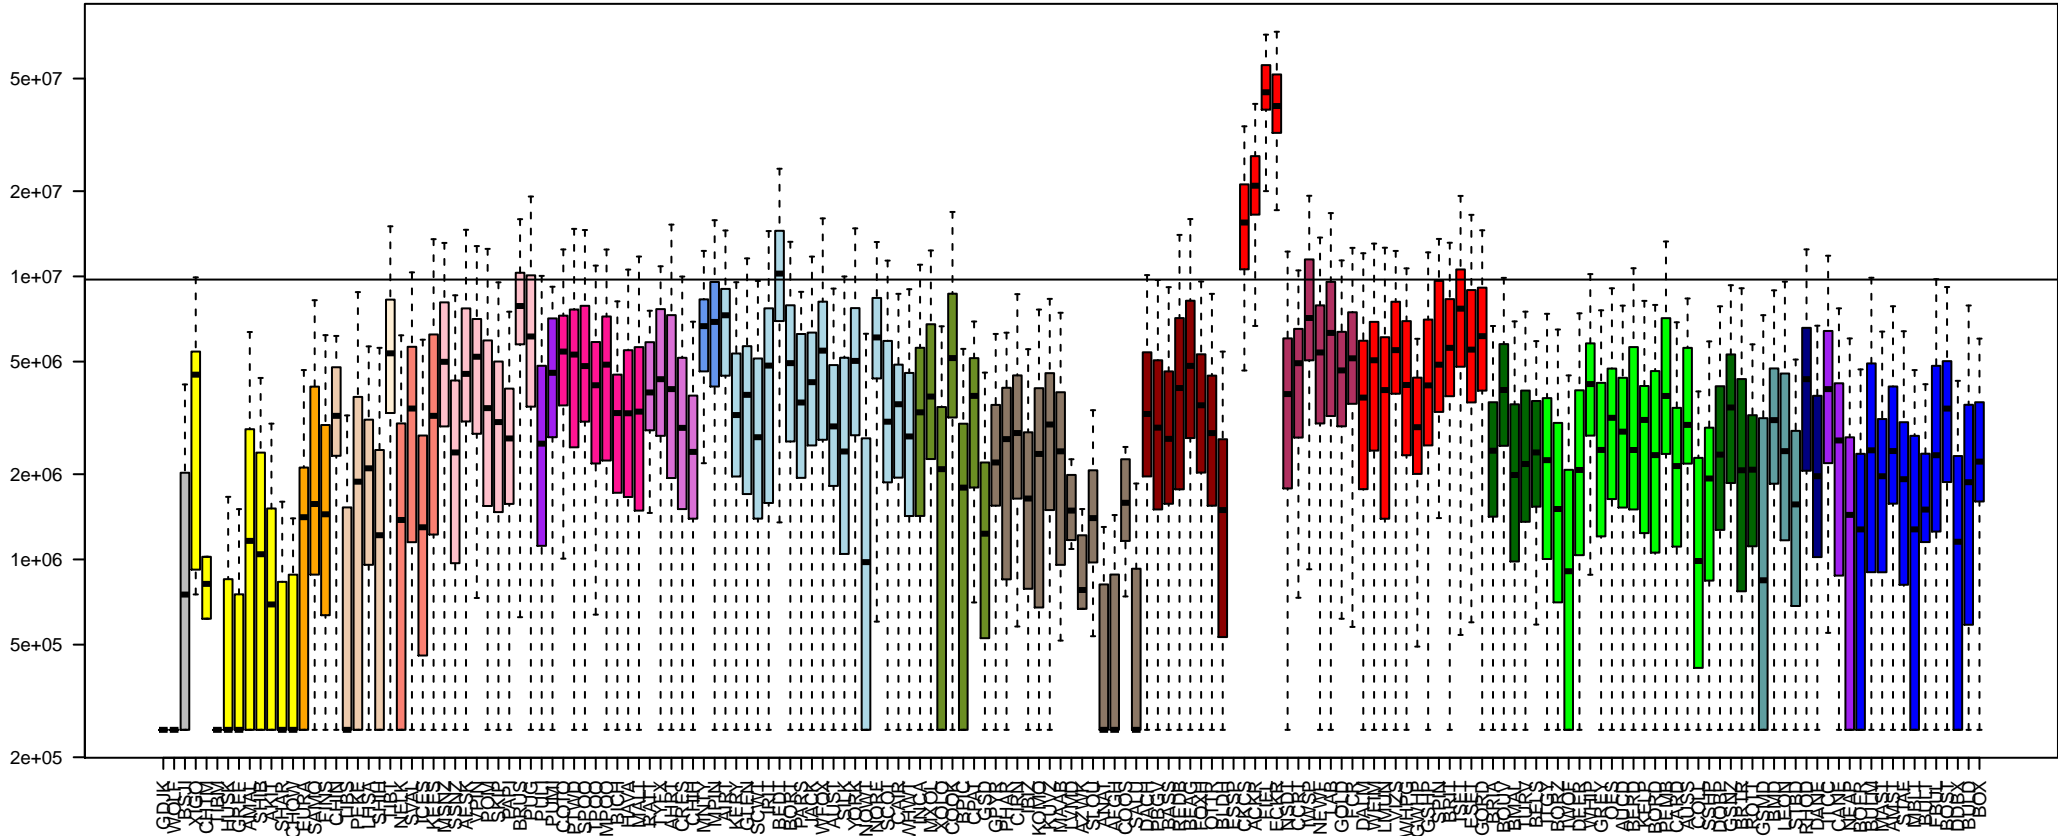

# Eurasier

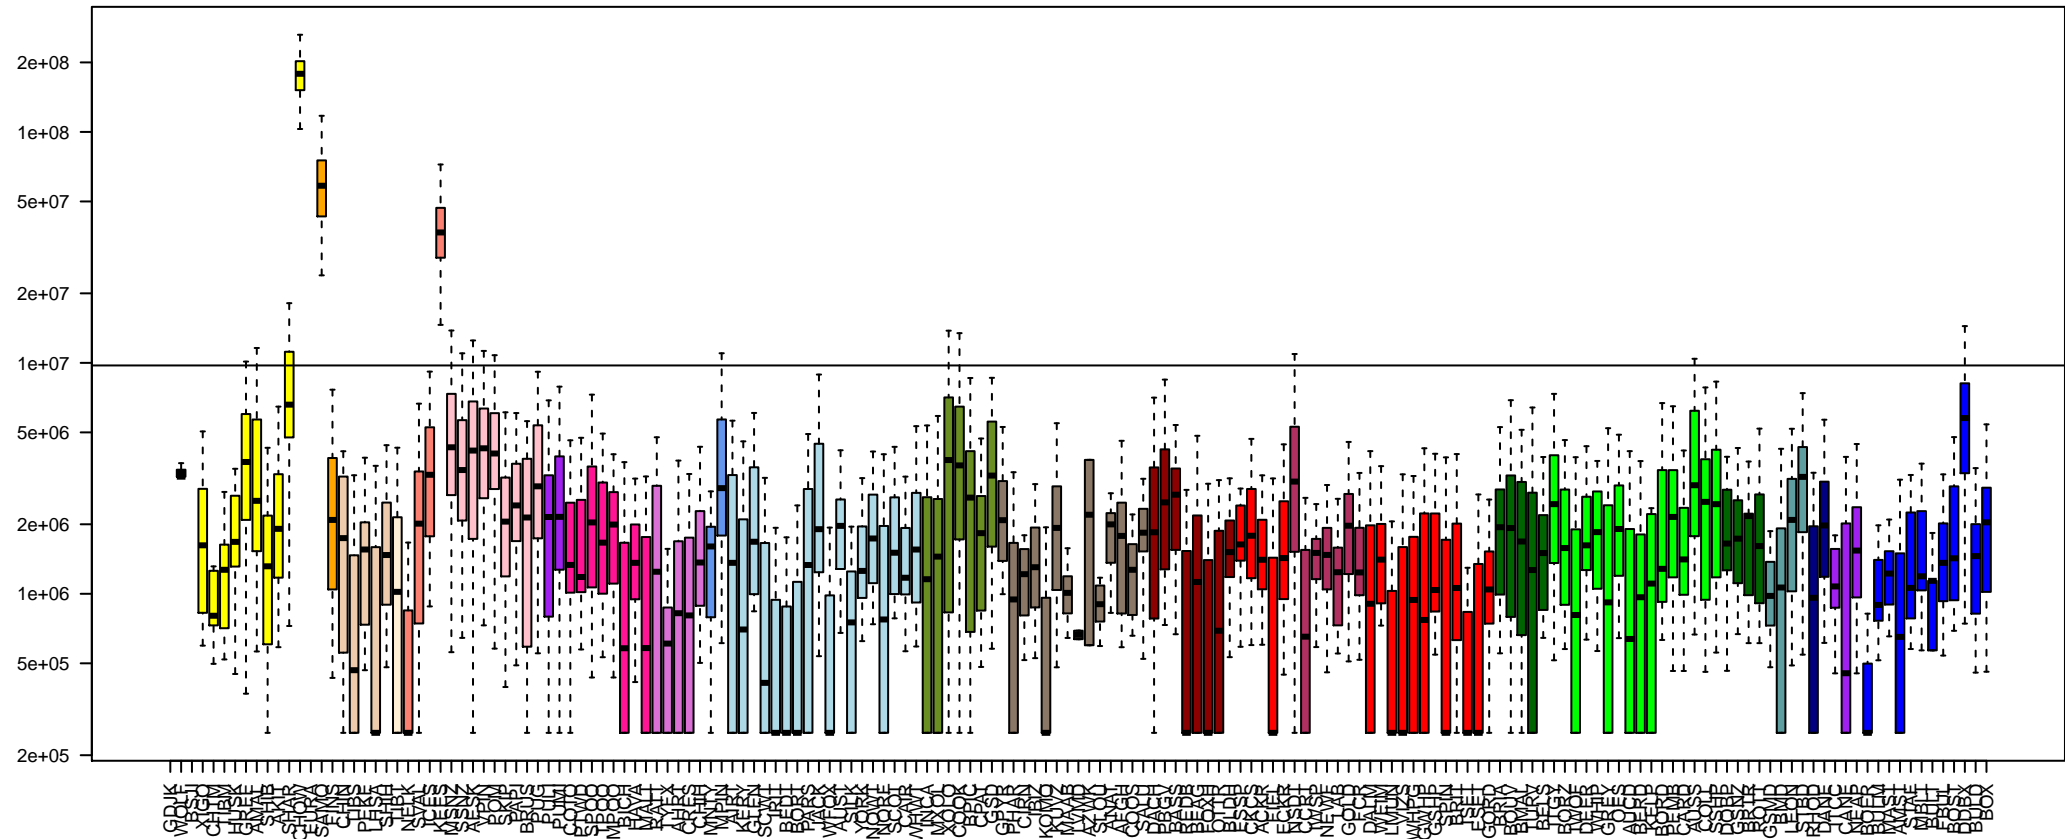

# Field Spaniel

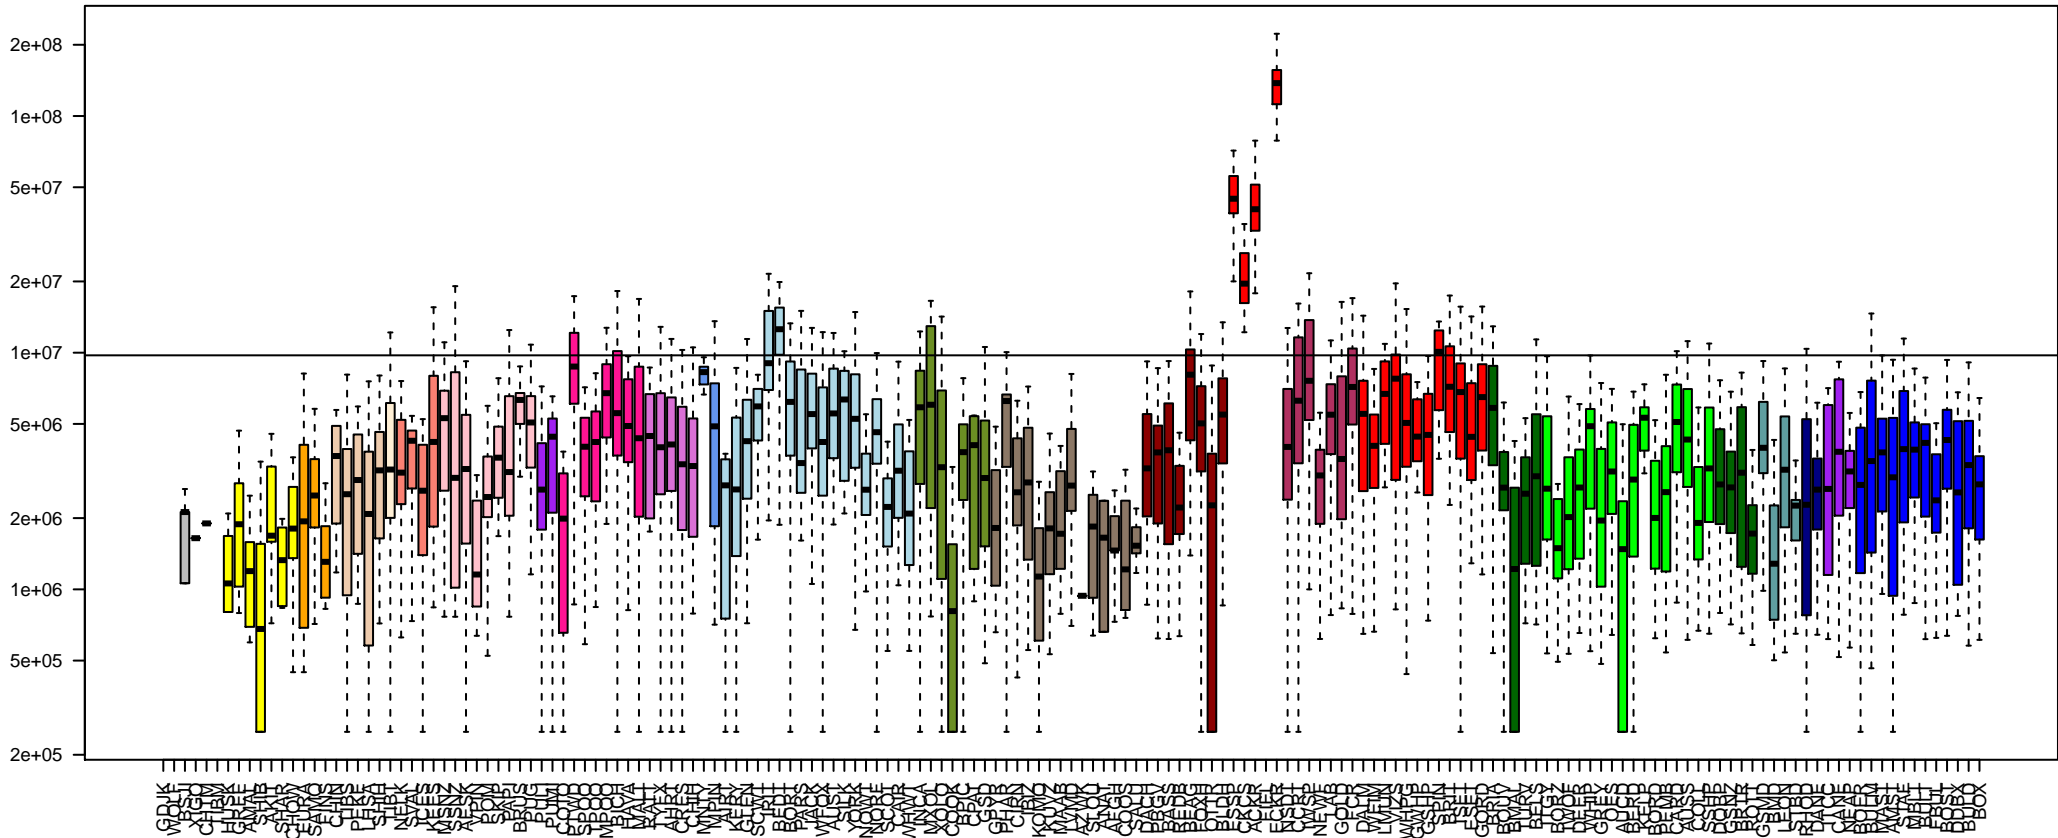



# Finish Spitz

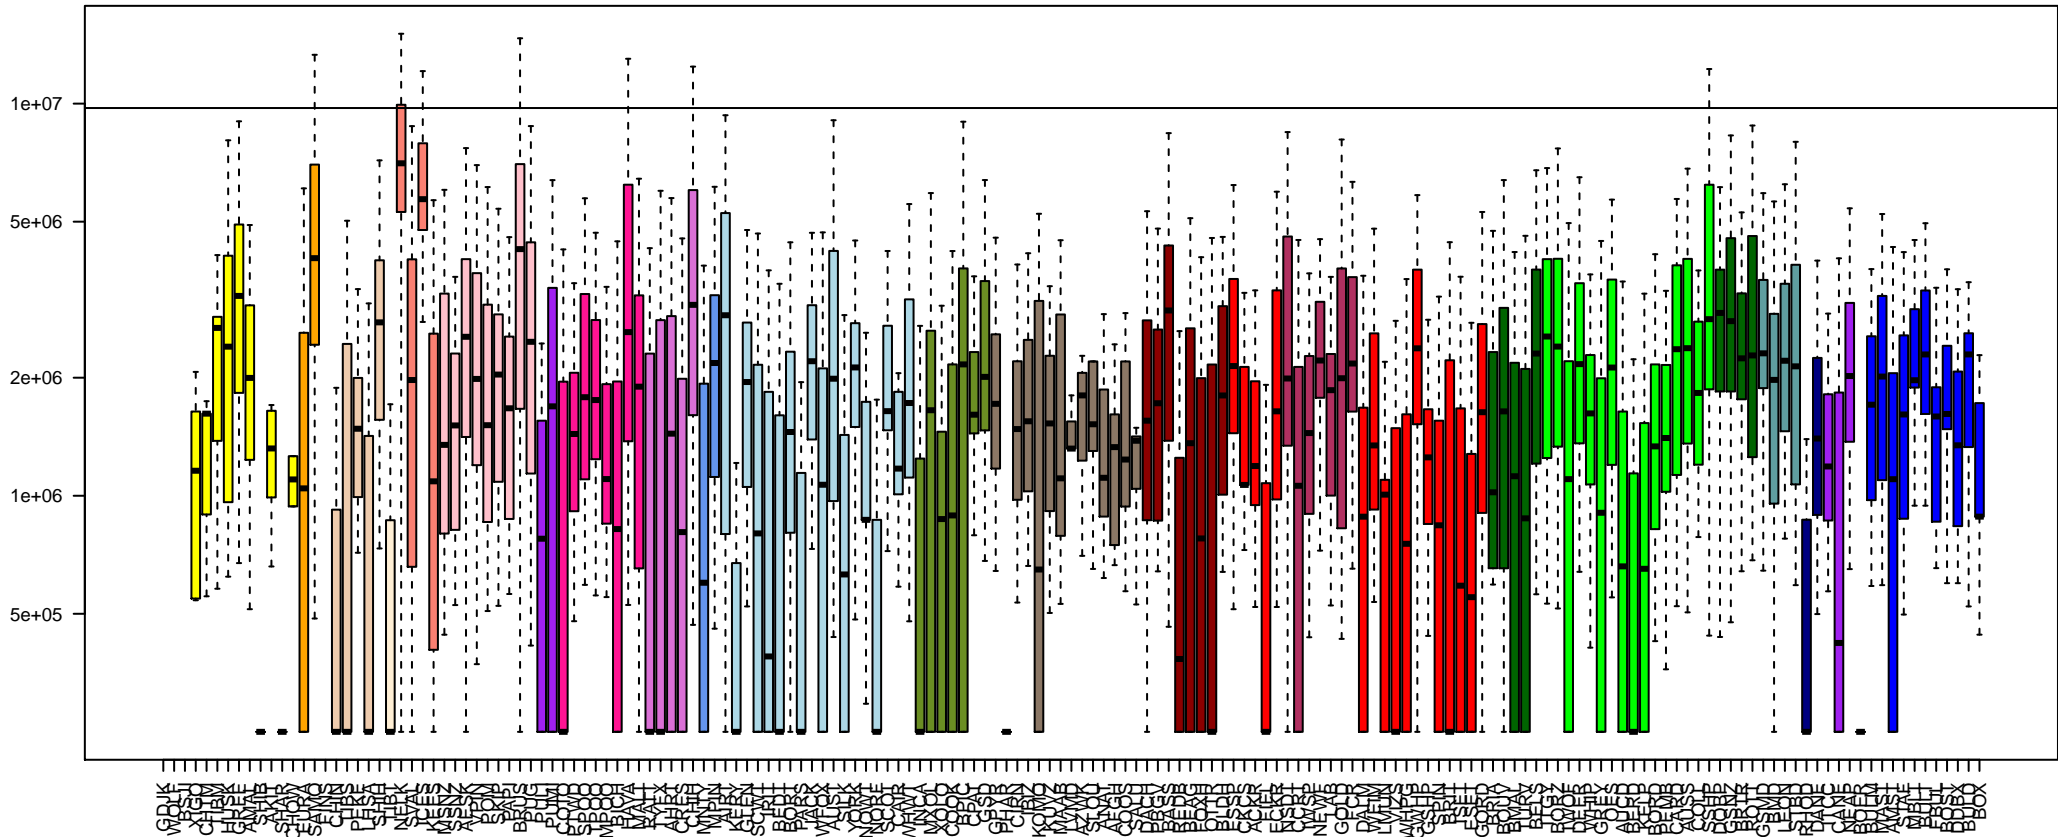



# Foxhound

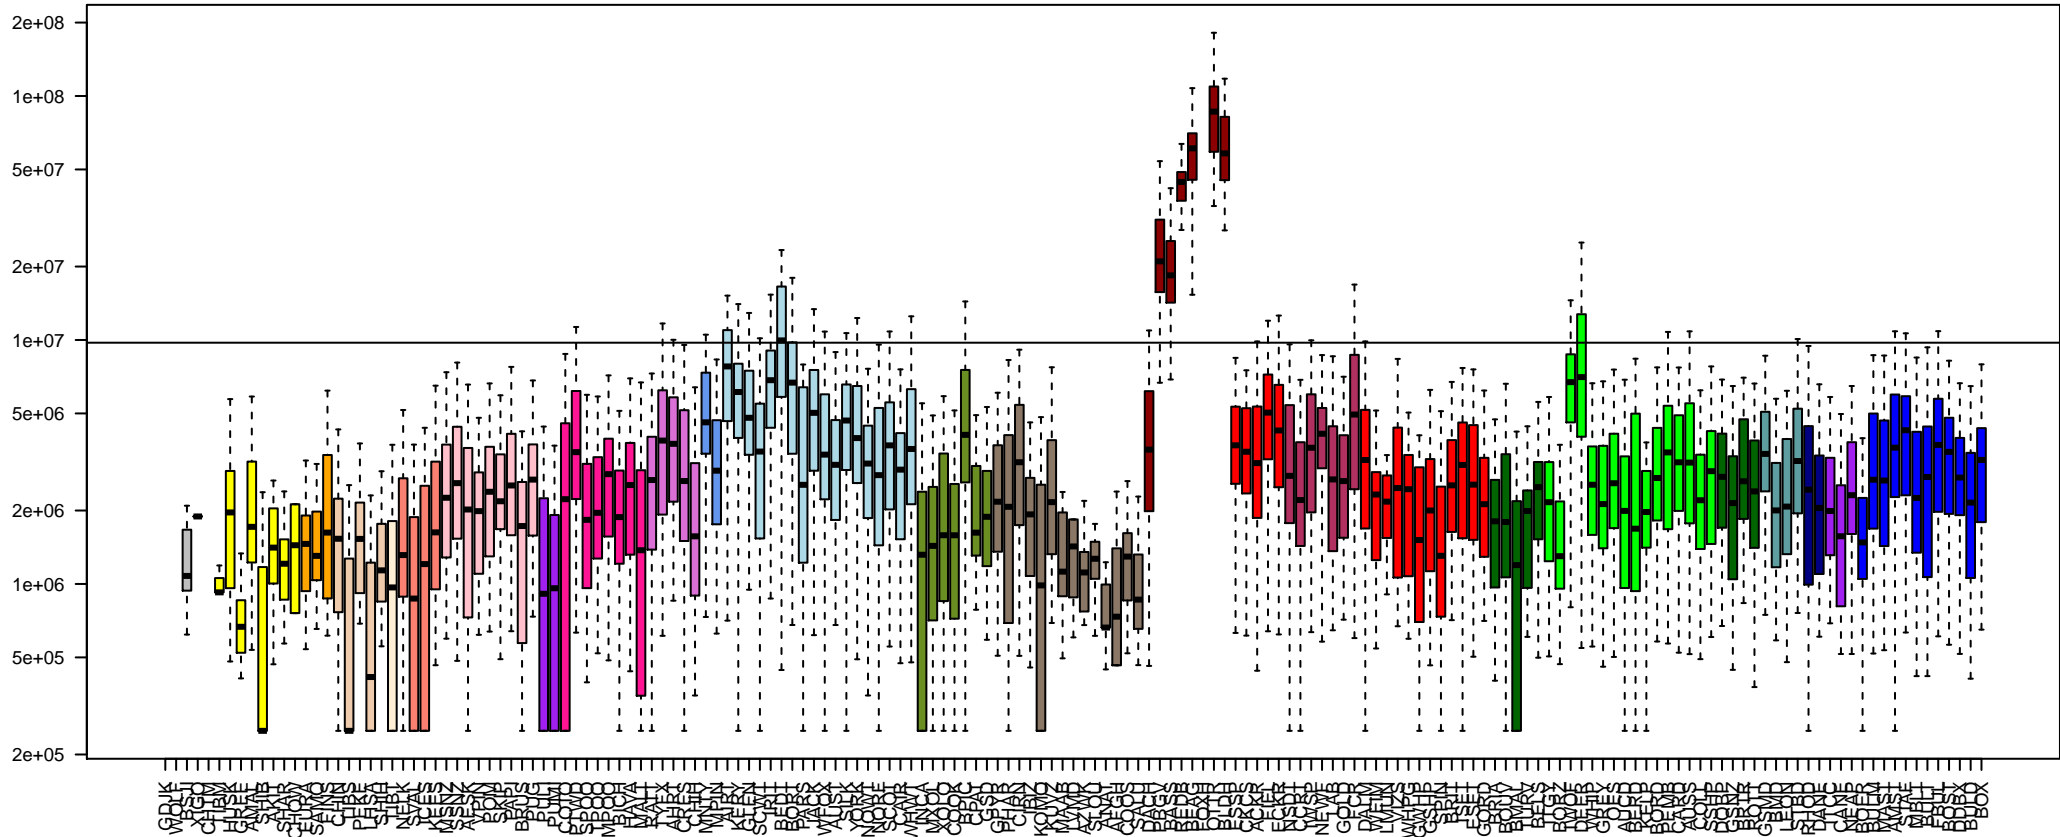

# French Bulldog

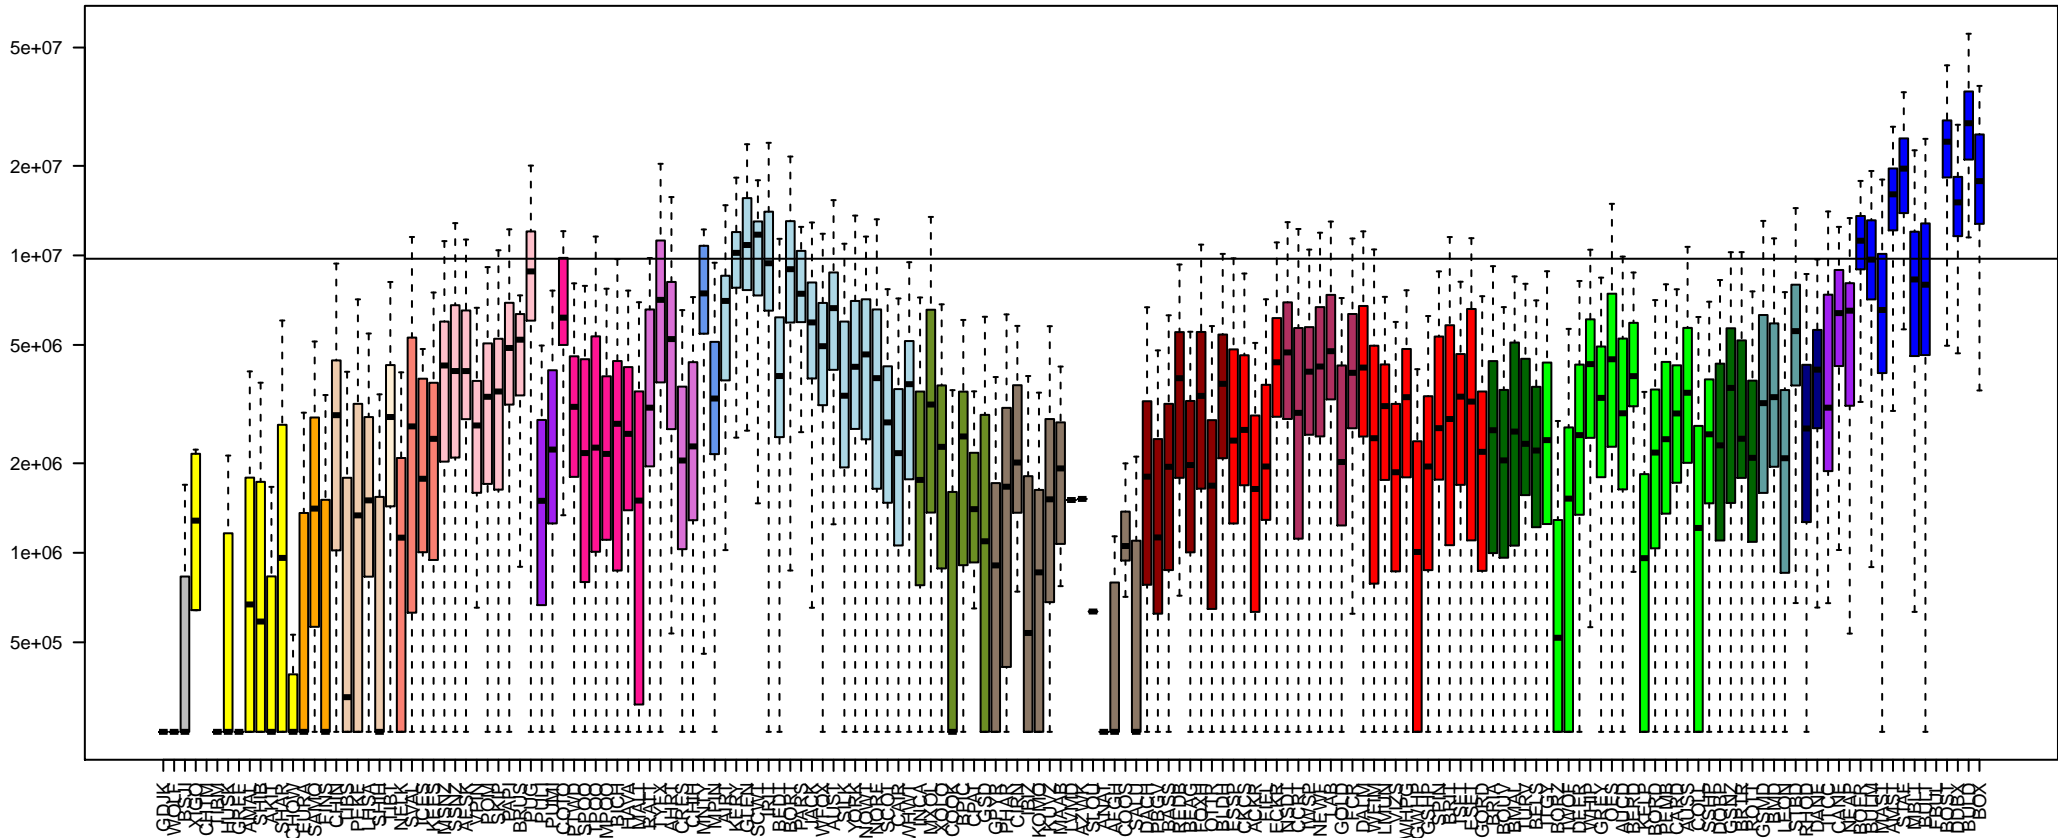



# German Shorthaired Pointer

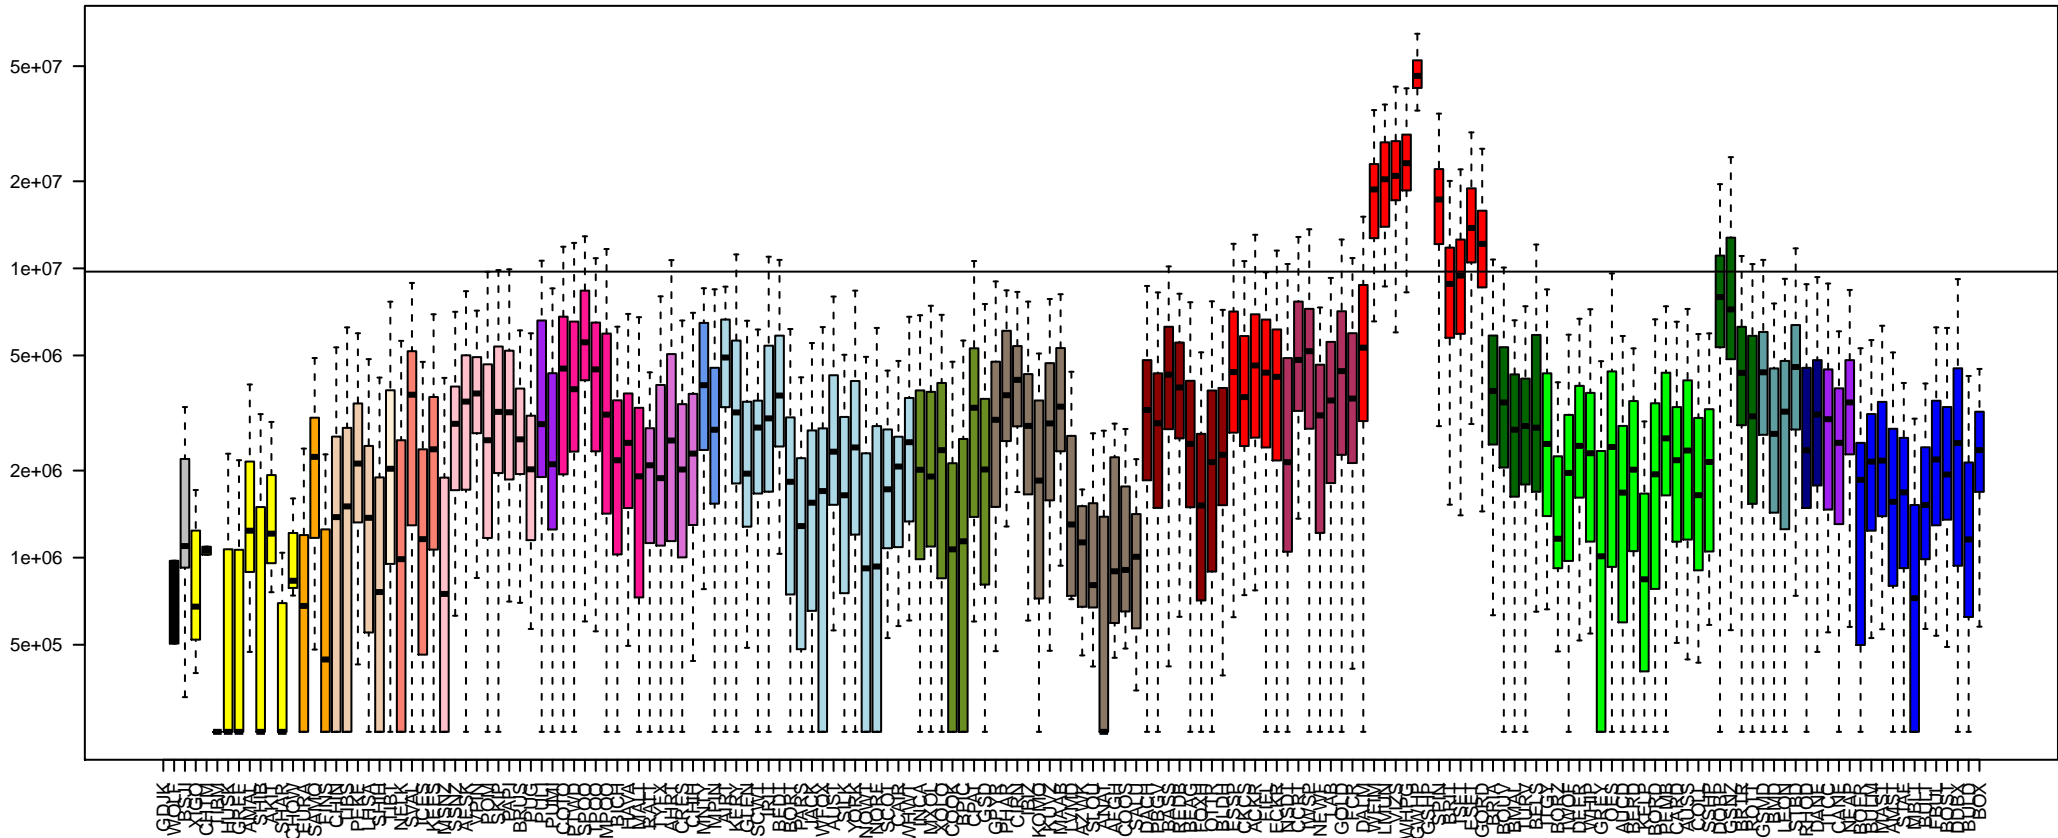

# German Wirehaired Pointer

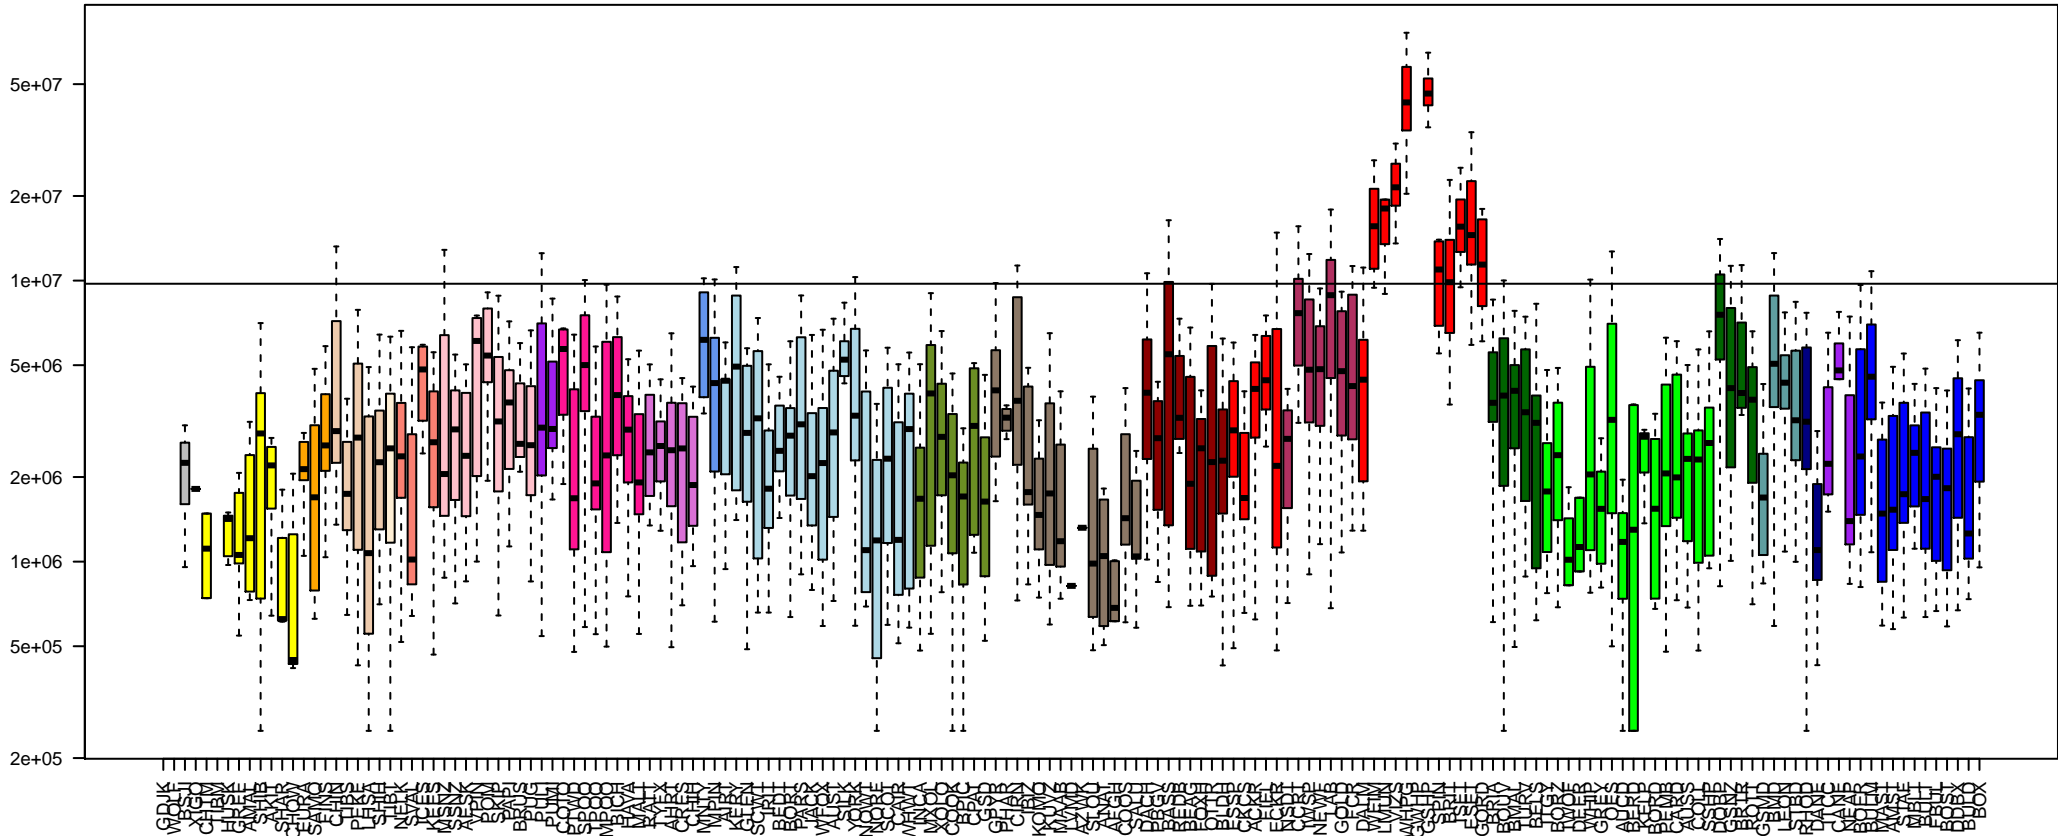

# Giant Schnauzer

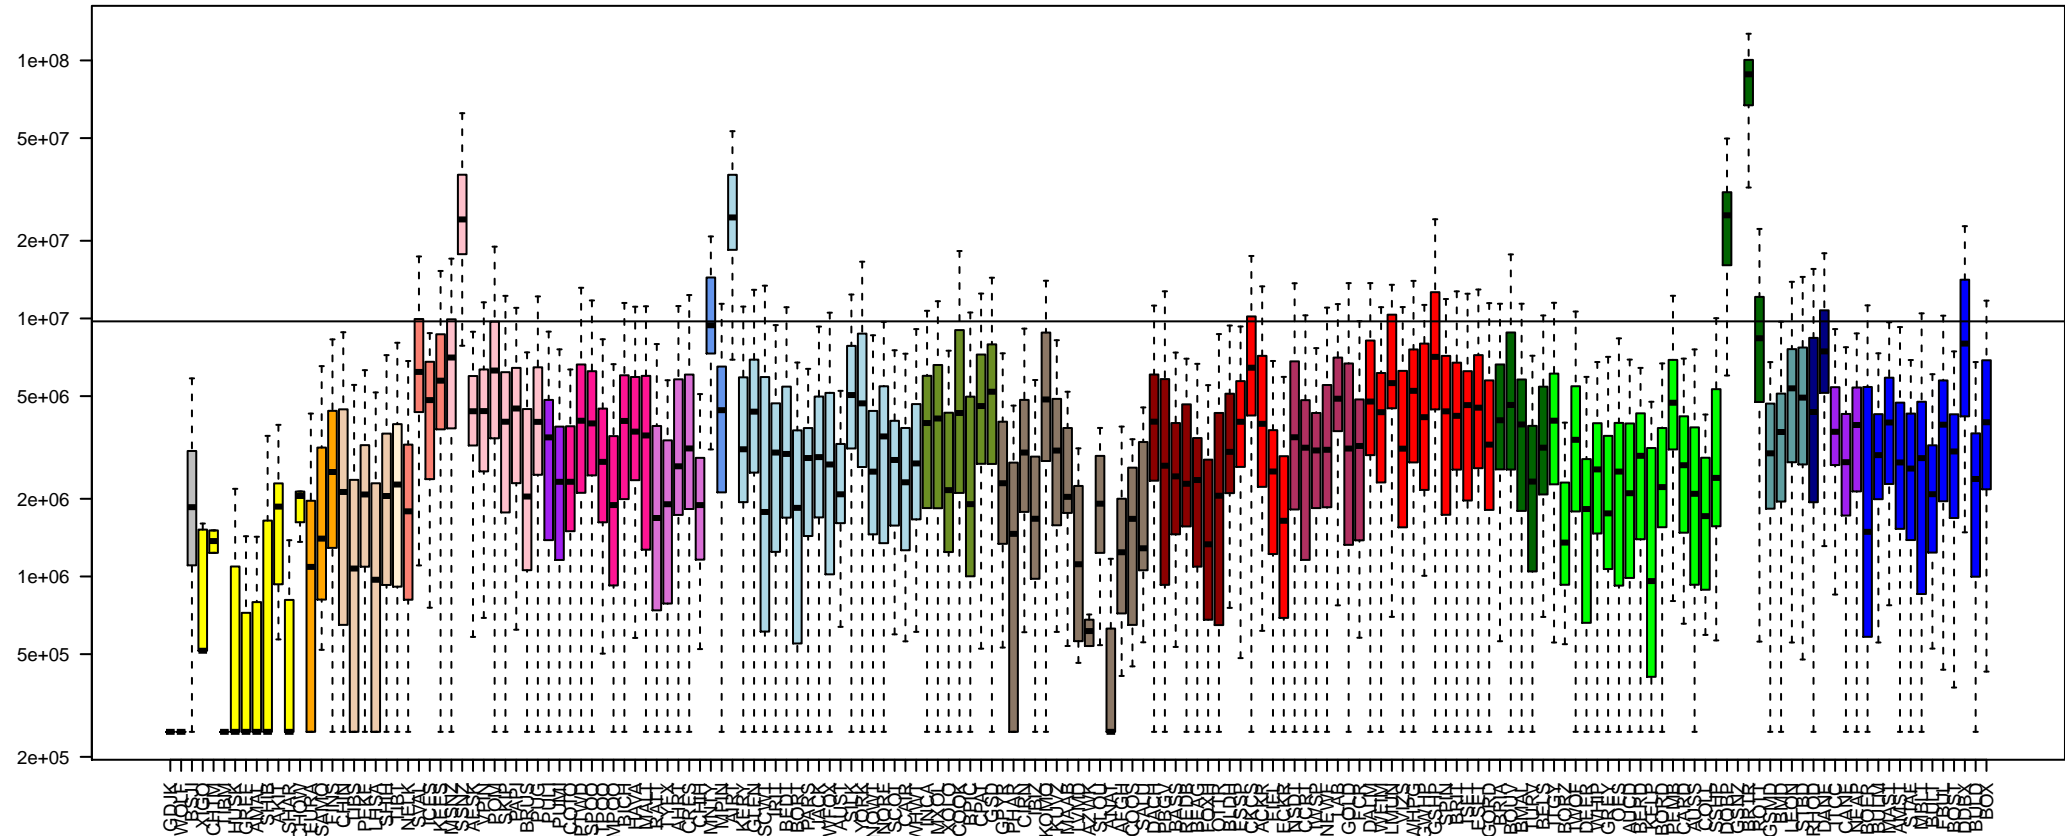



# Glen of Imaal Terrier

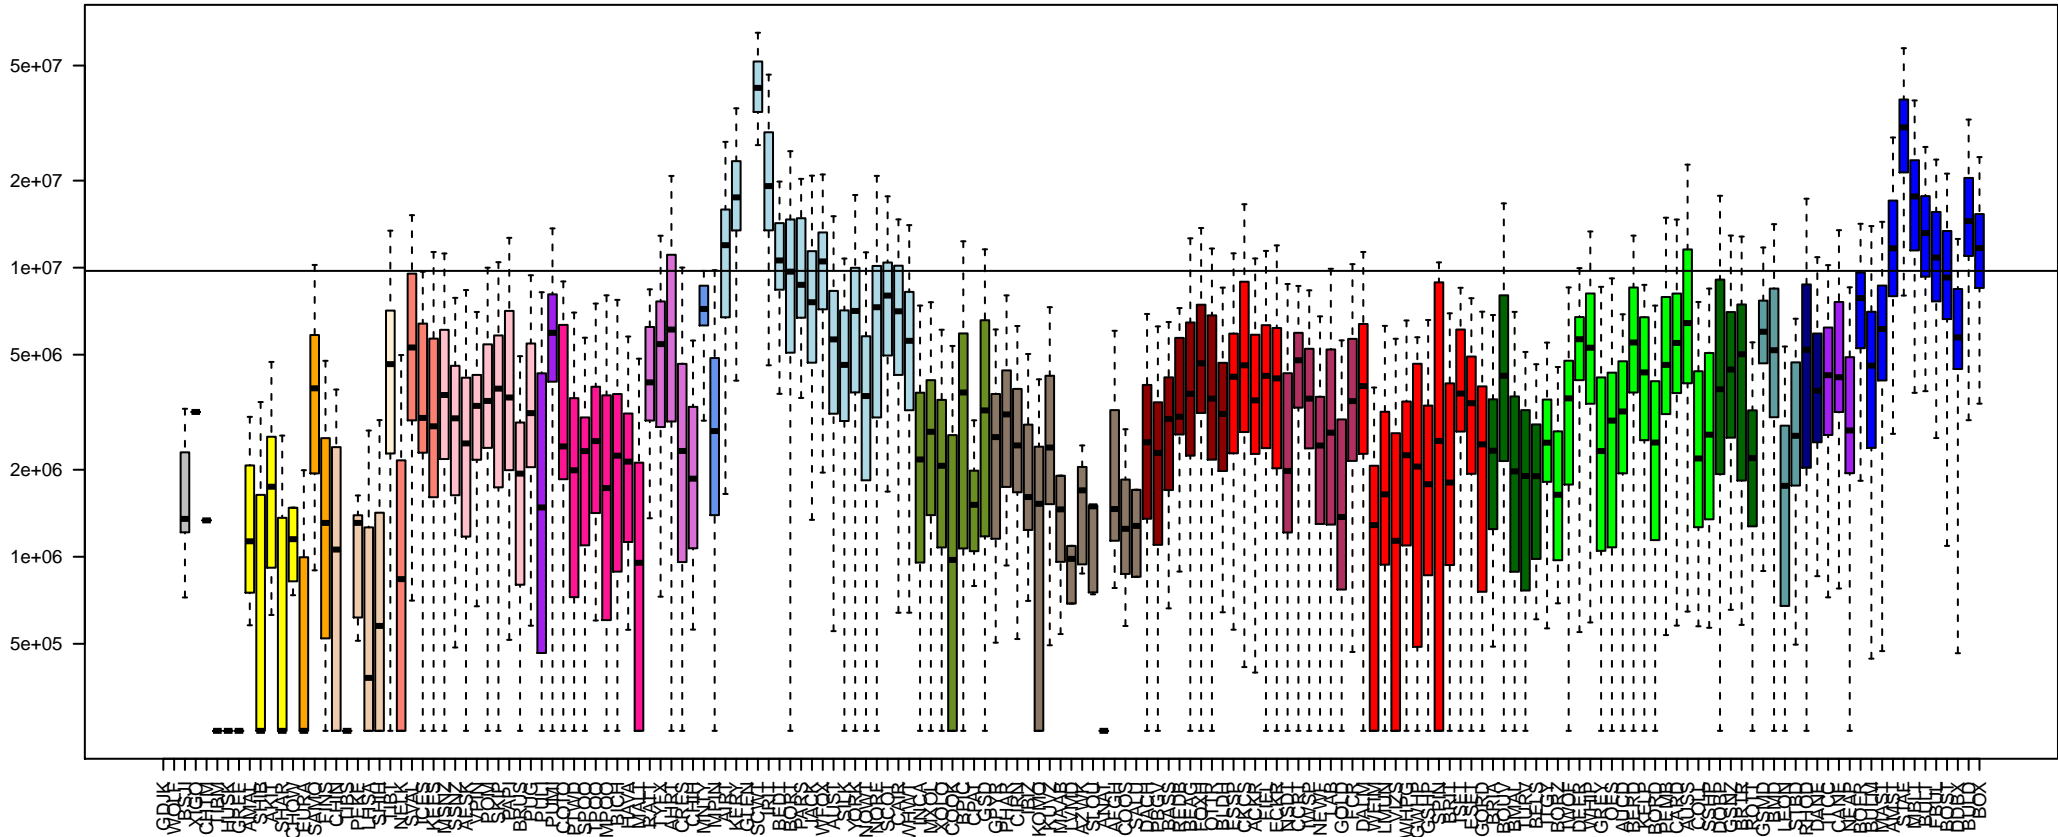

# Golden Jackal

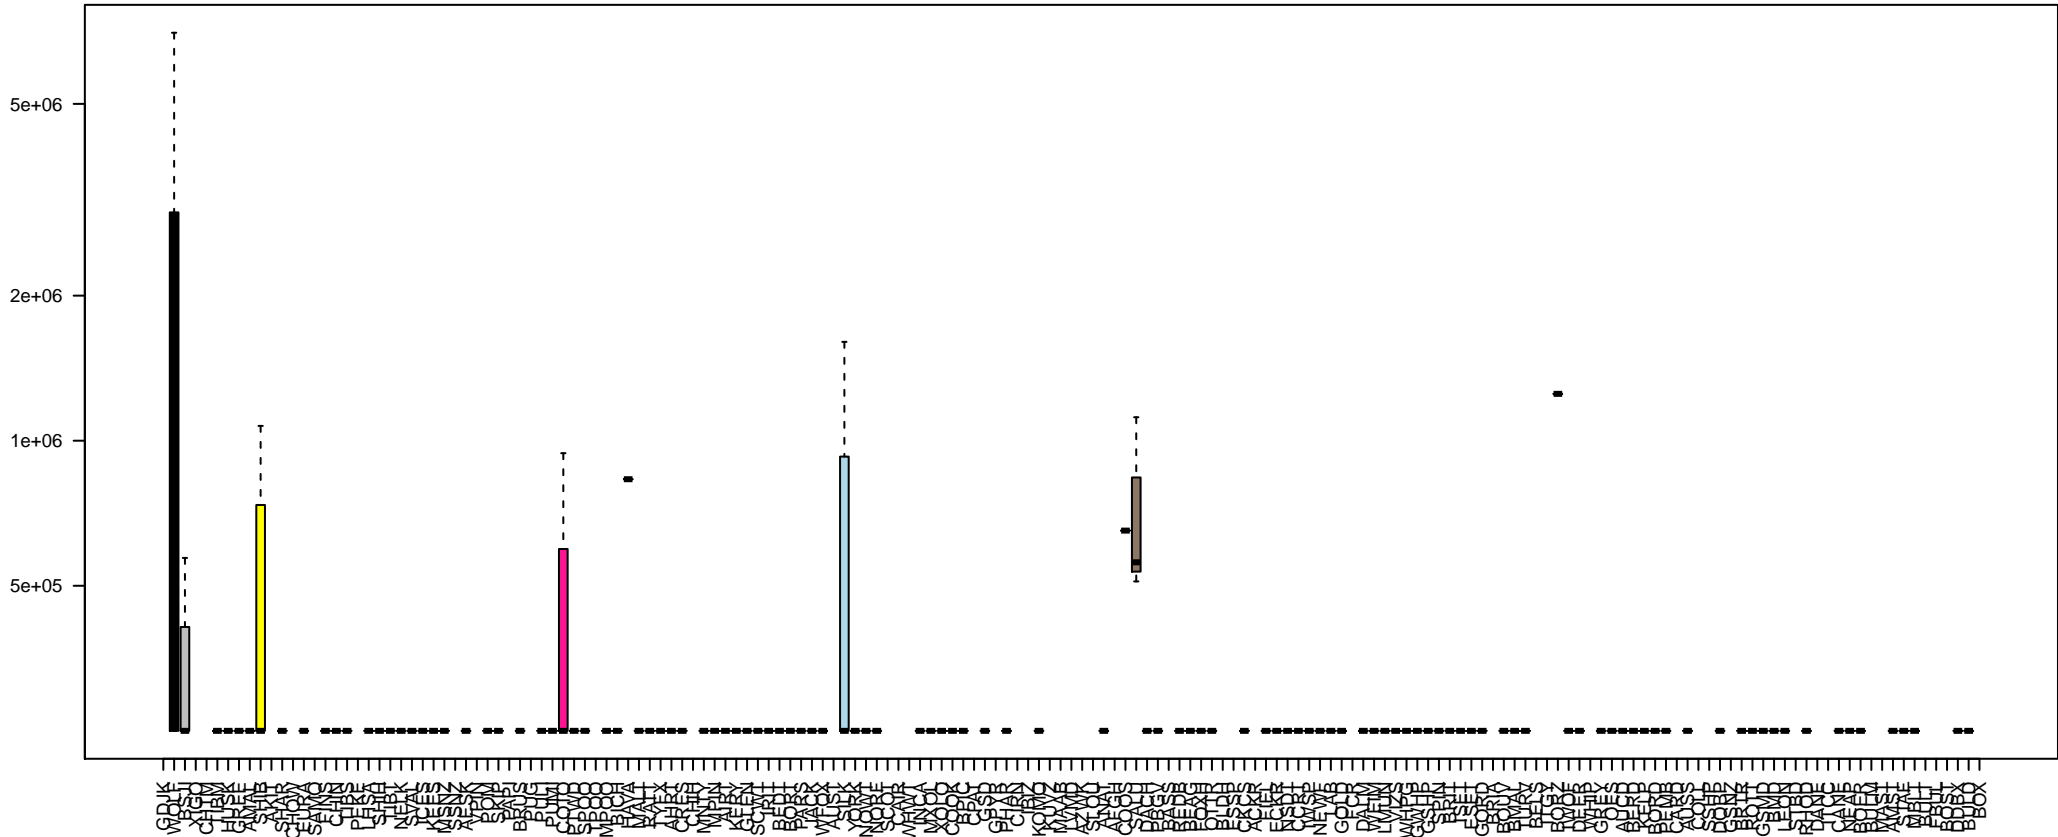



# Gordon Setter

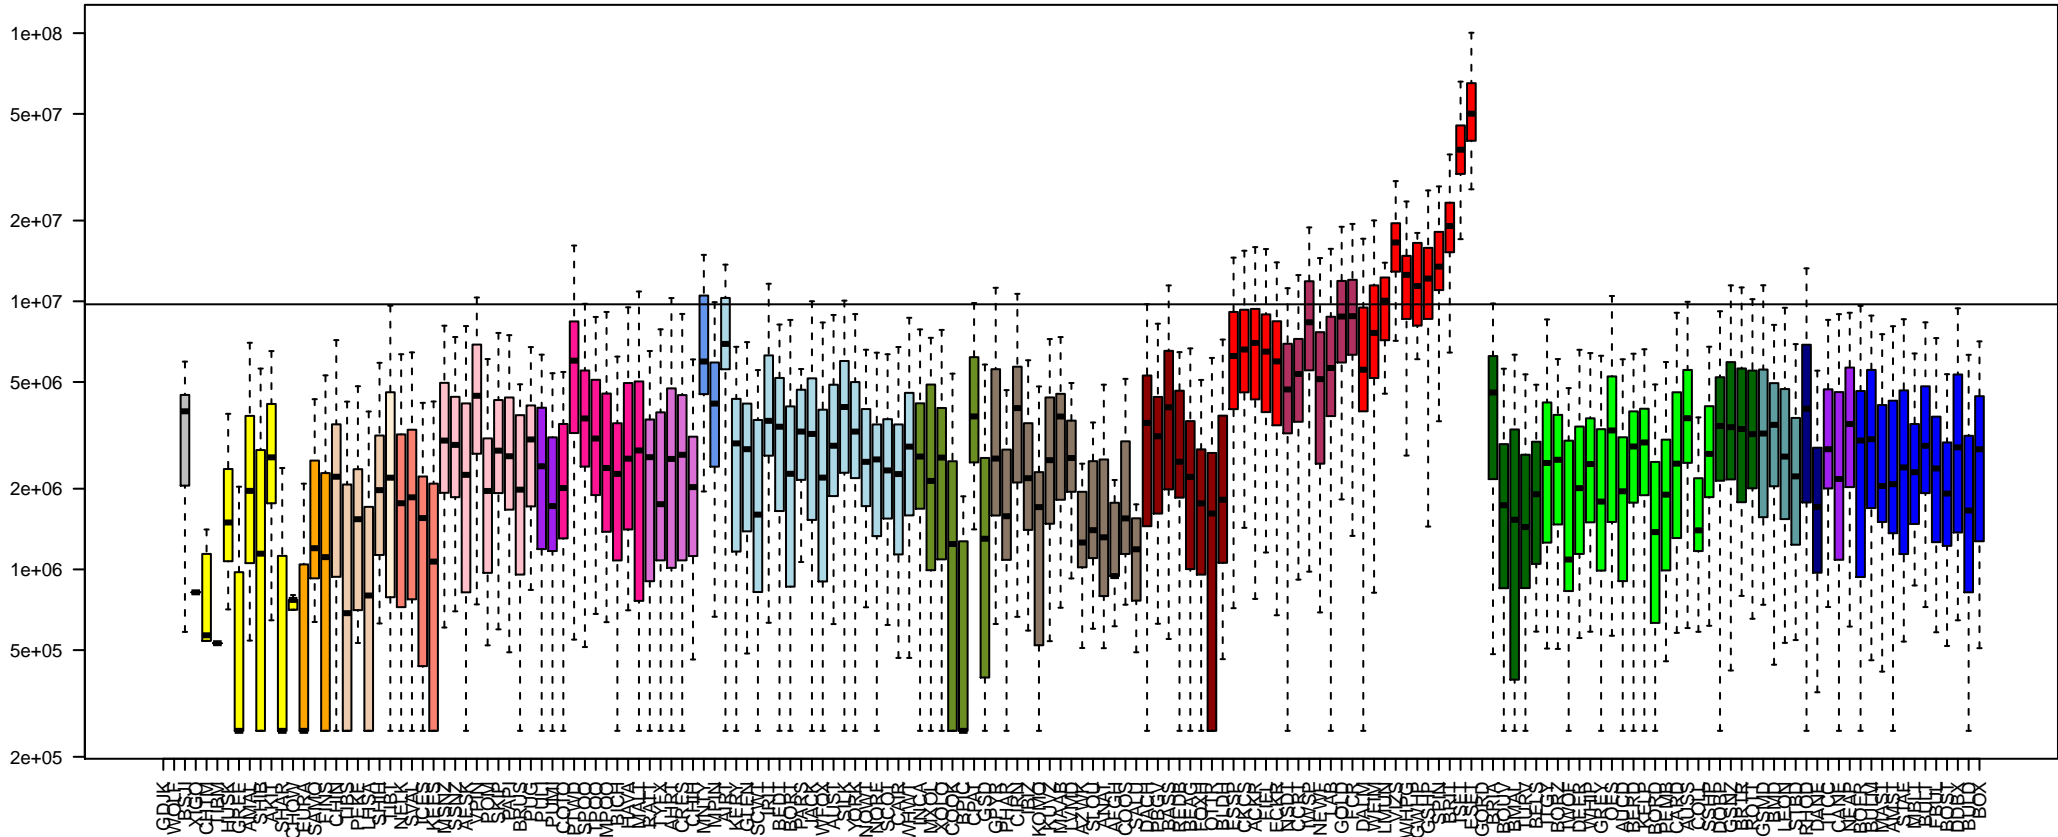

# Great Dane

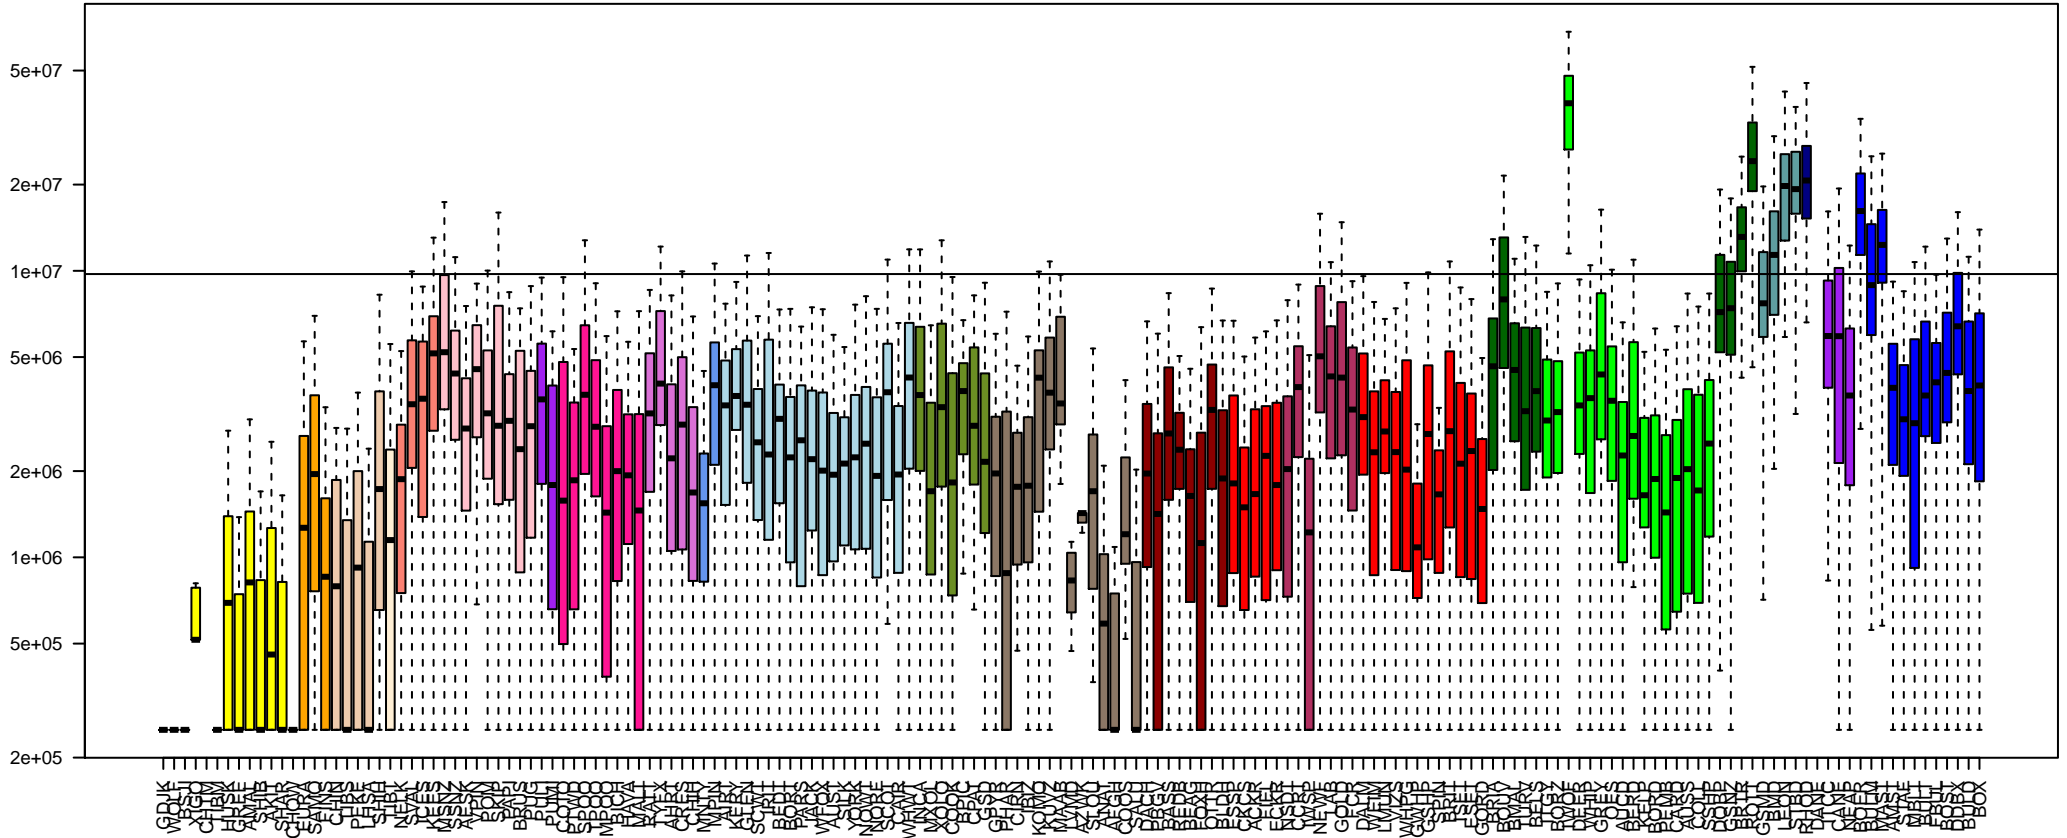



# Greater Swiss Mountain Dog

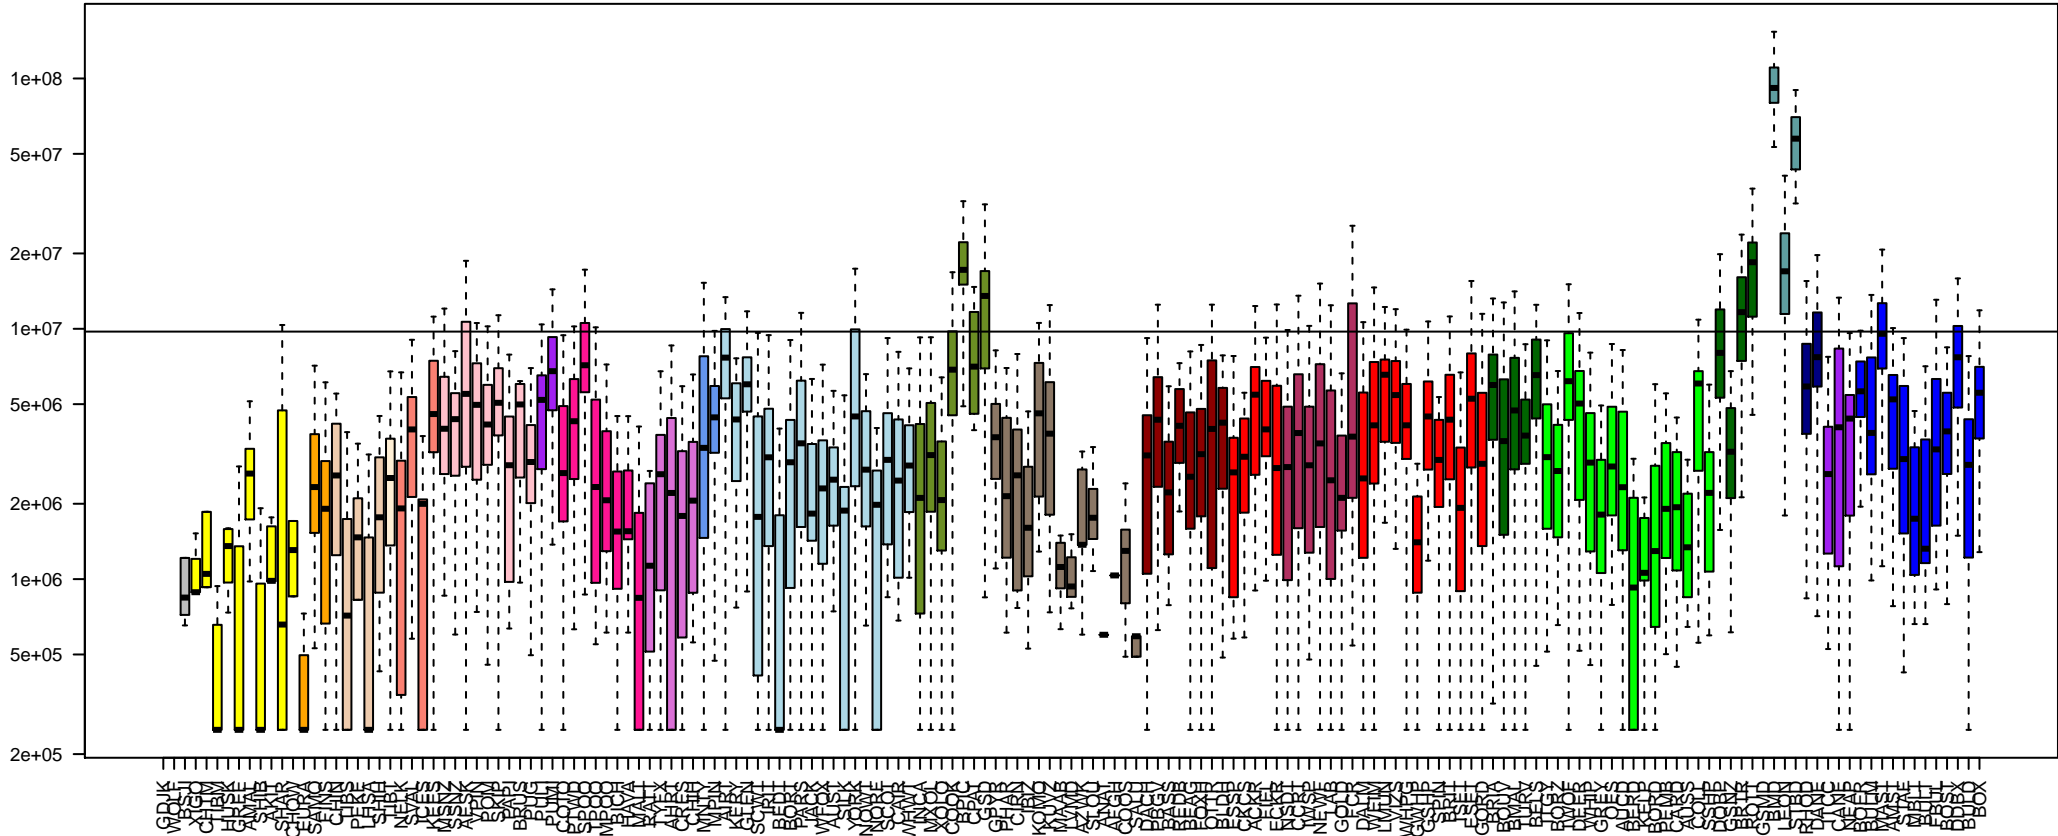

# Greenland Sledge Dog

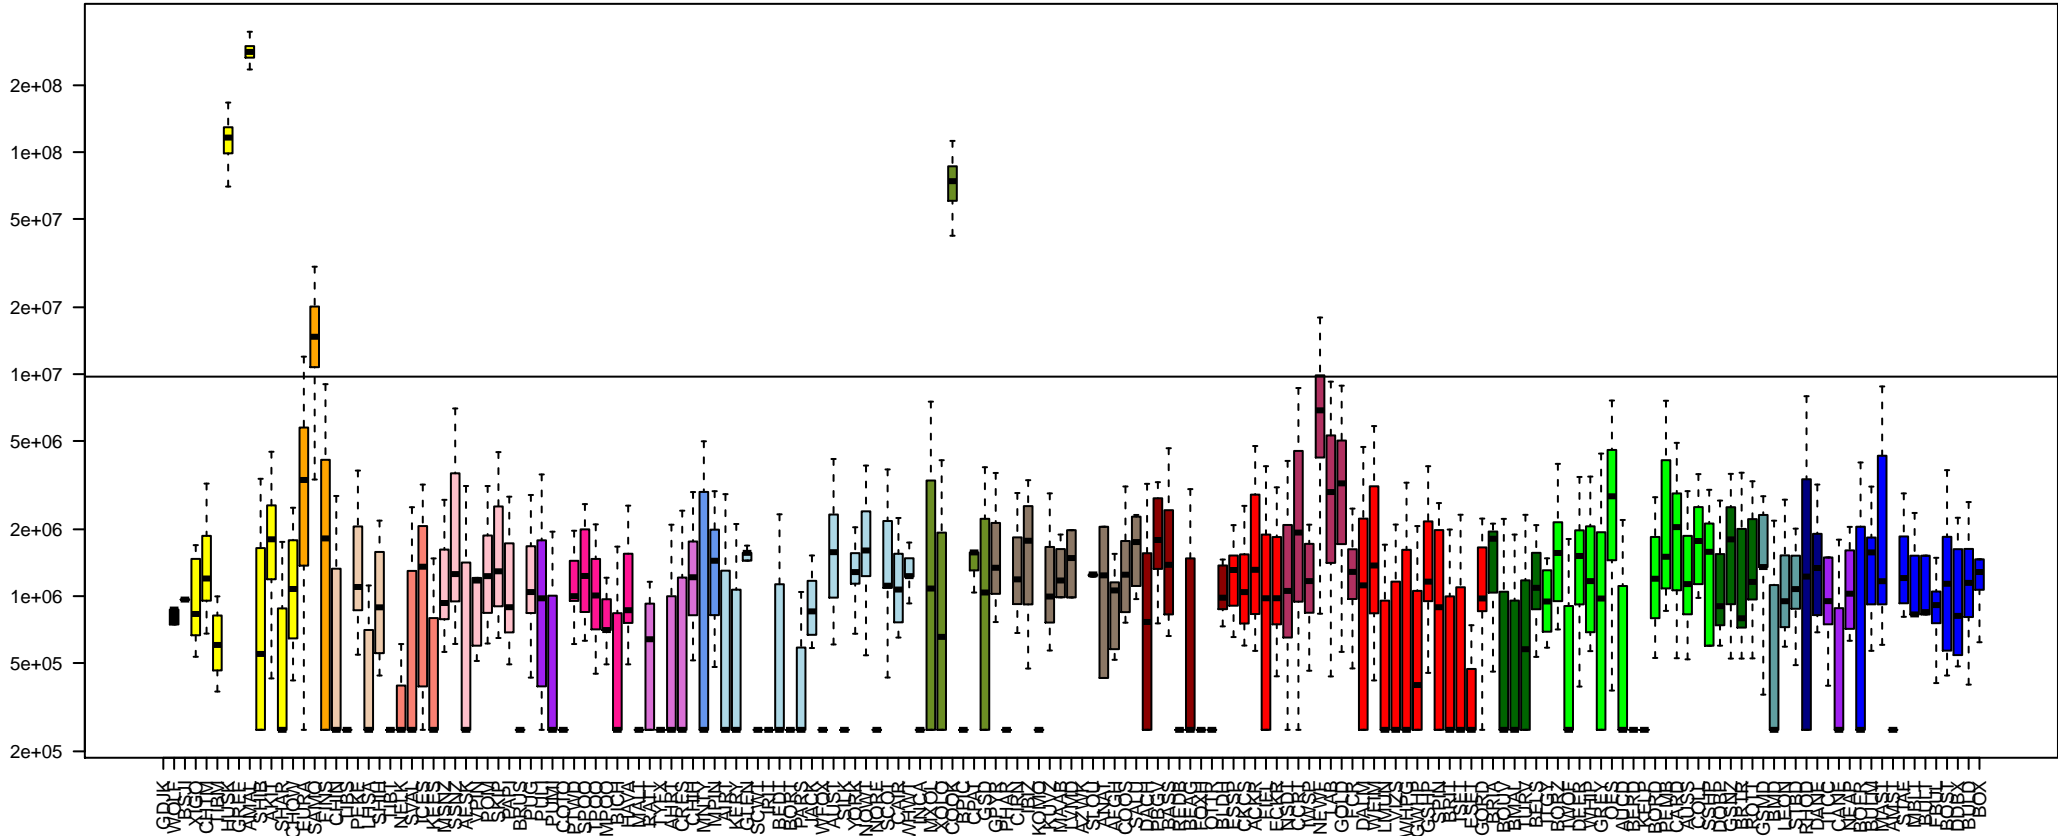



# Greyhound

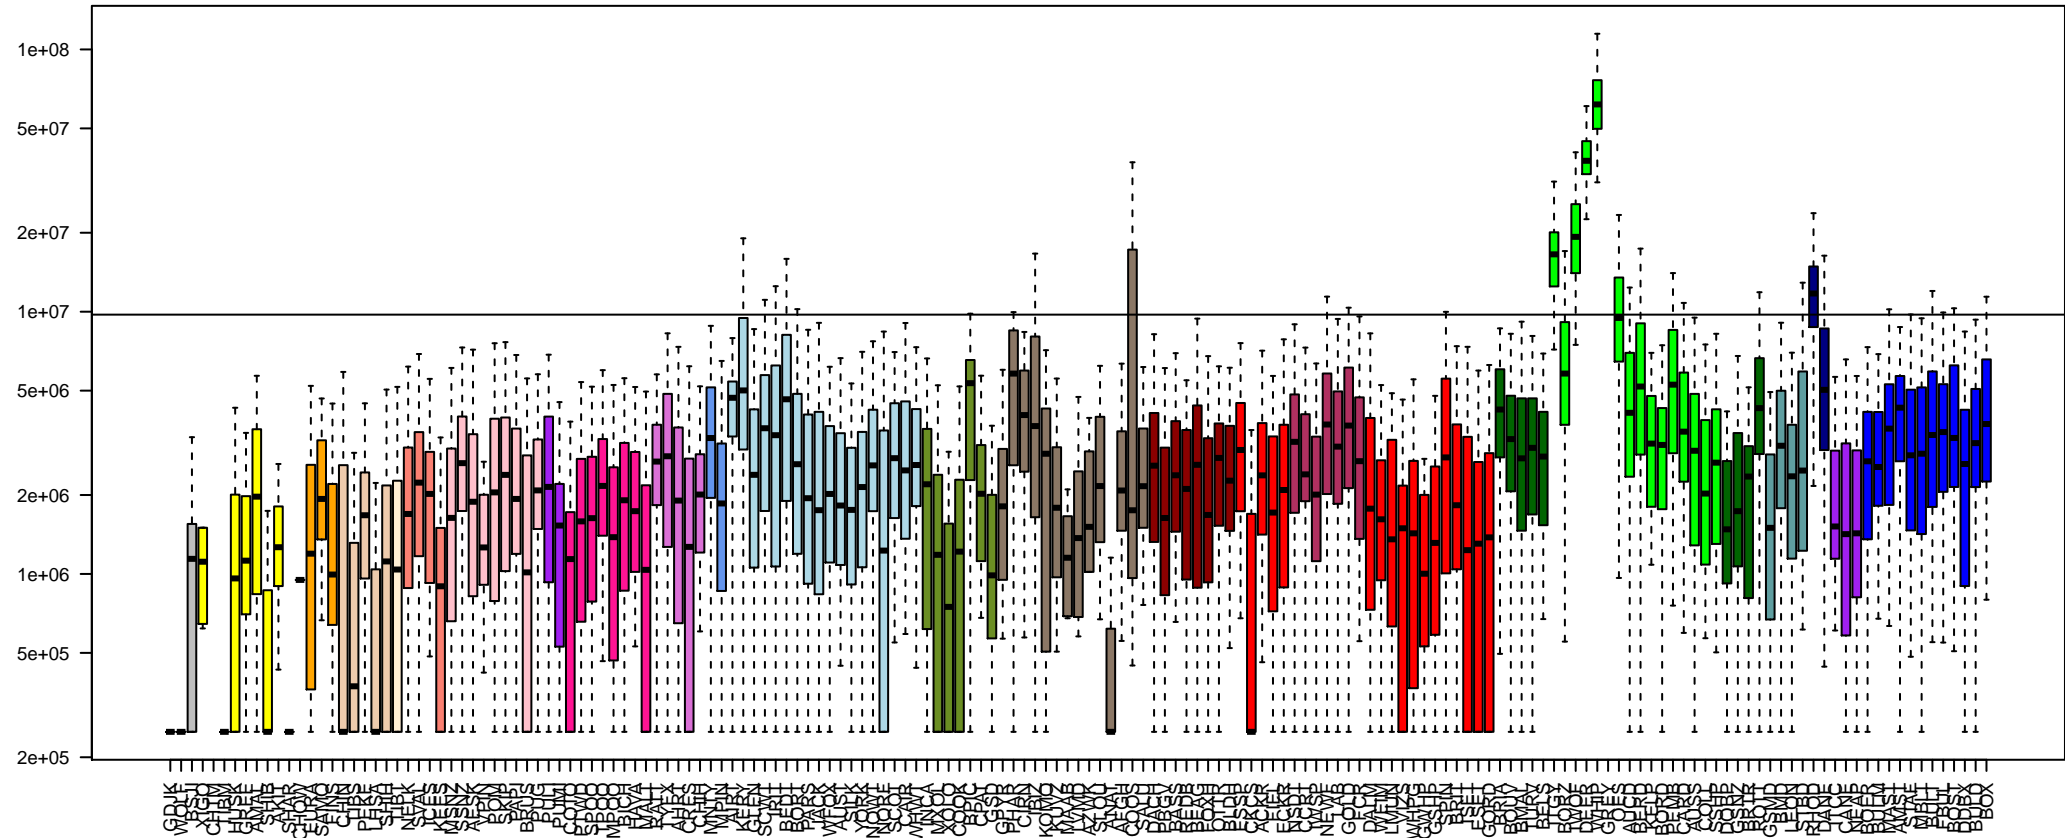

# Havaneses

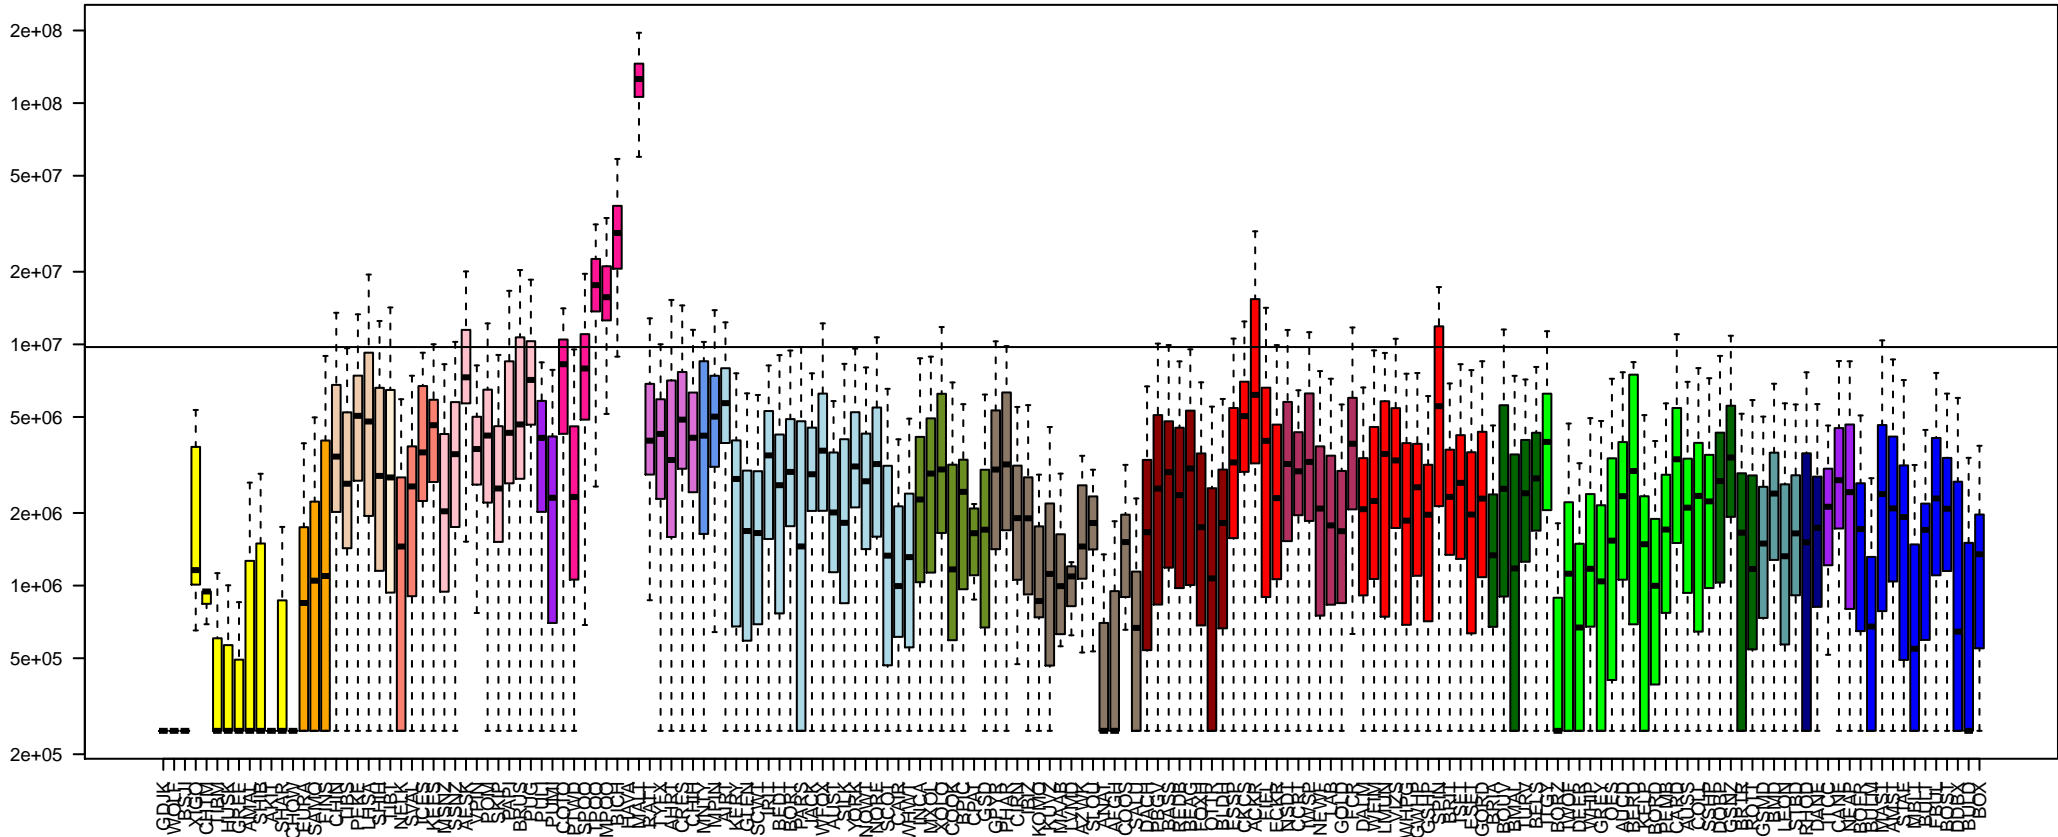



# Icelandic Sheepdog

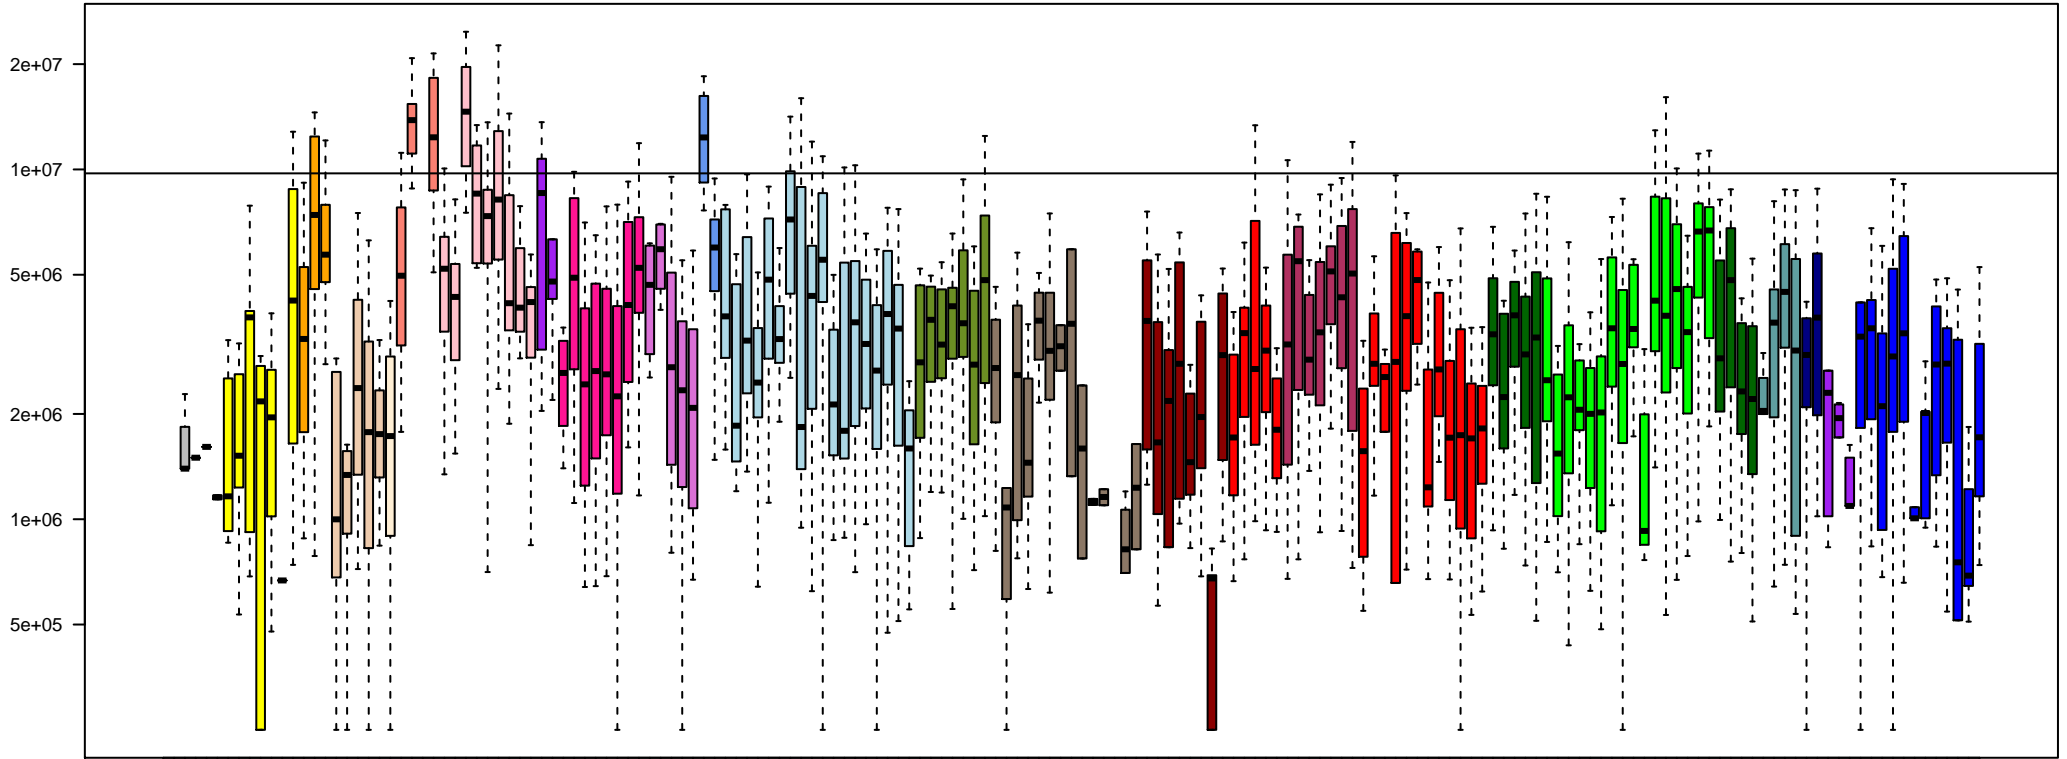

Small, rotated text labels along the x-axis, likely representing categories or groups. The labels are densely packed and difficult to read due to their orientation and size.



# Irish Terrier

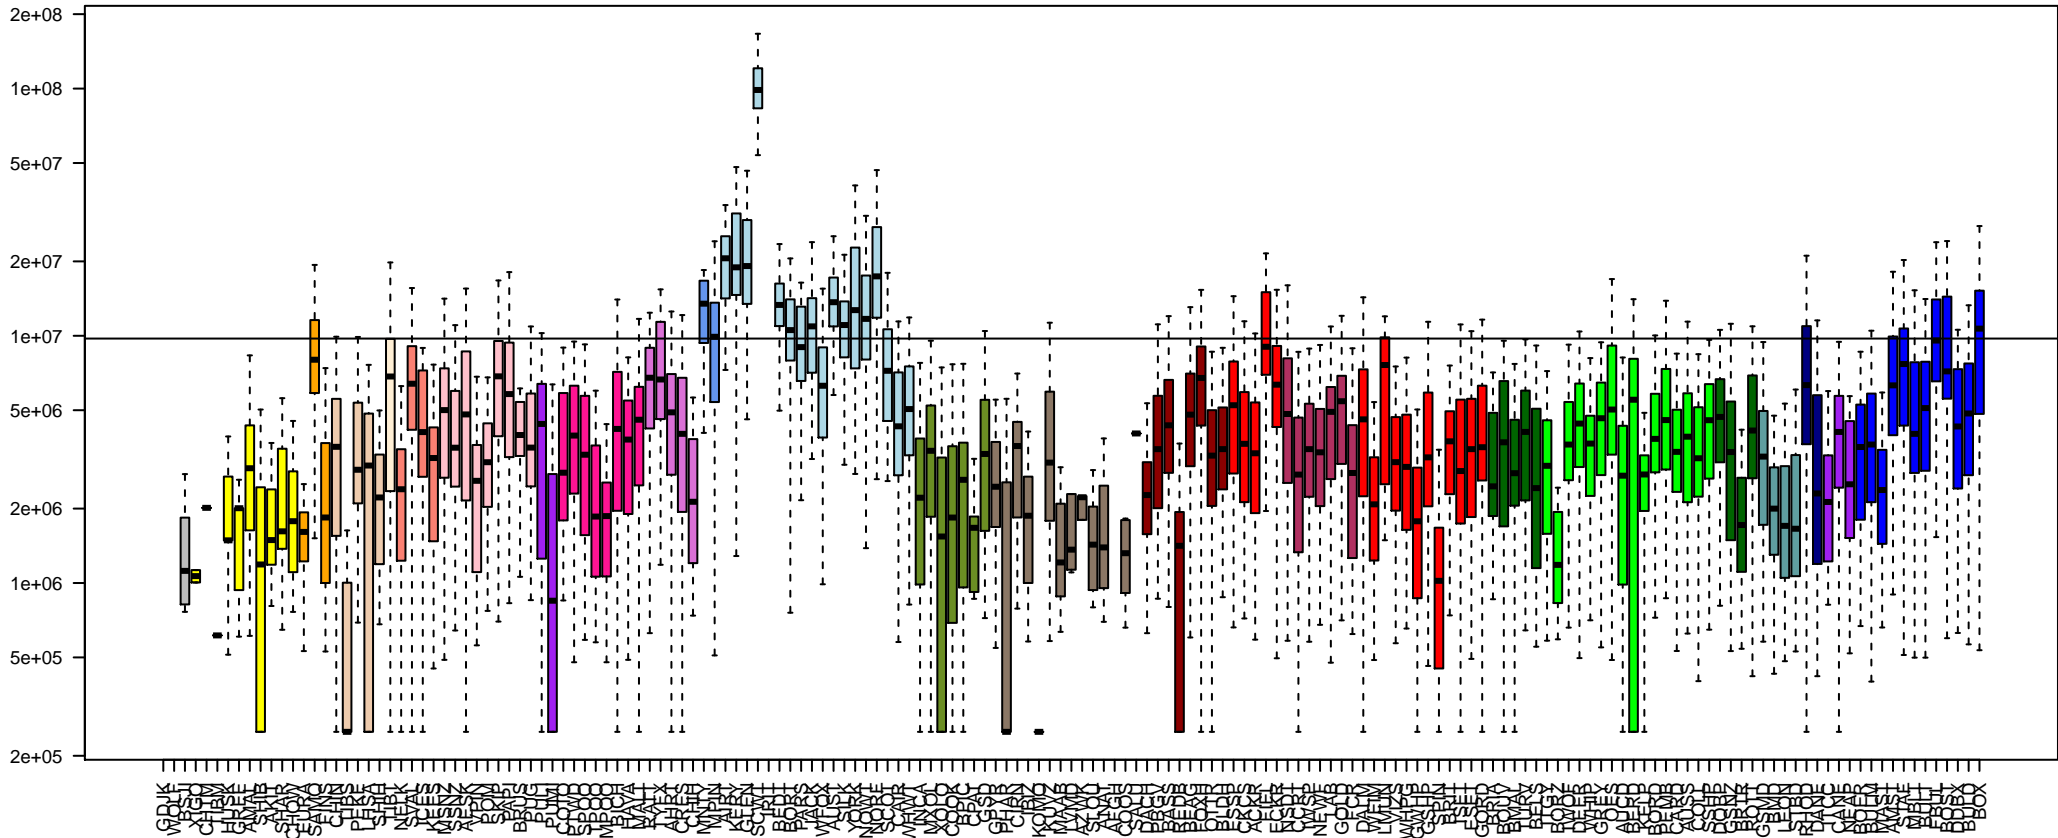



# Irish Wolfhound

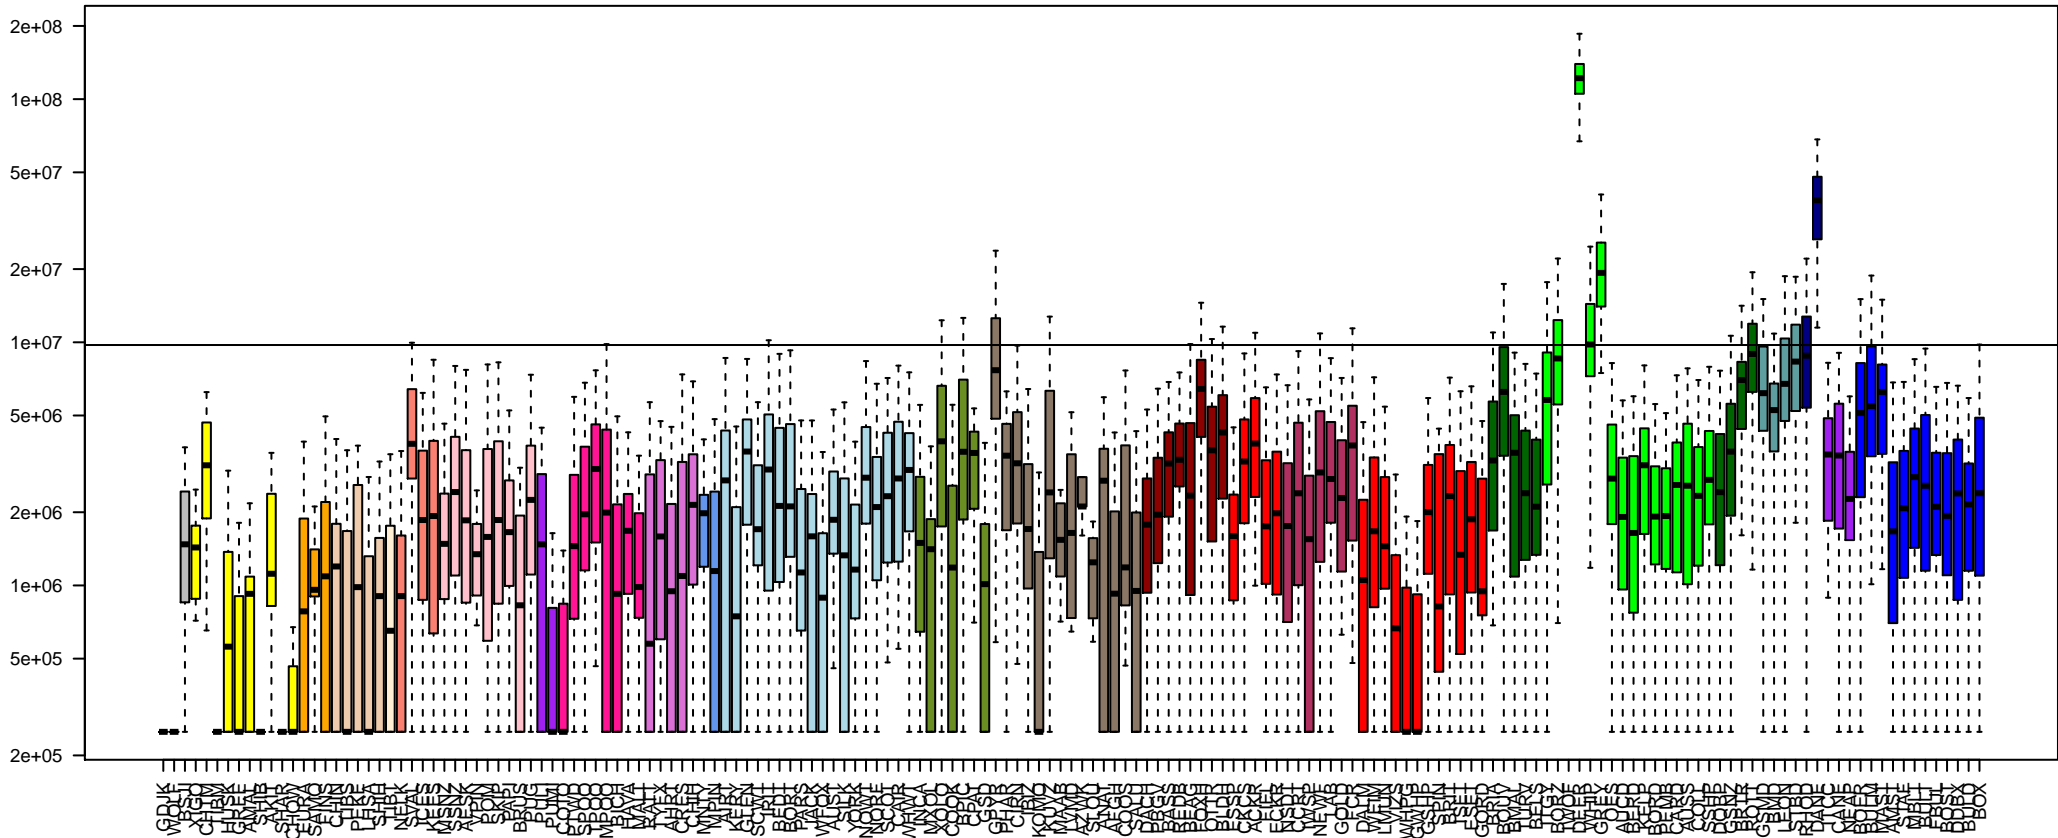



# Italian Greyhound

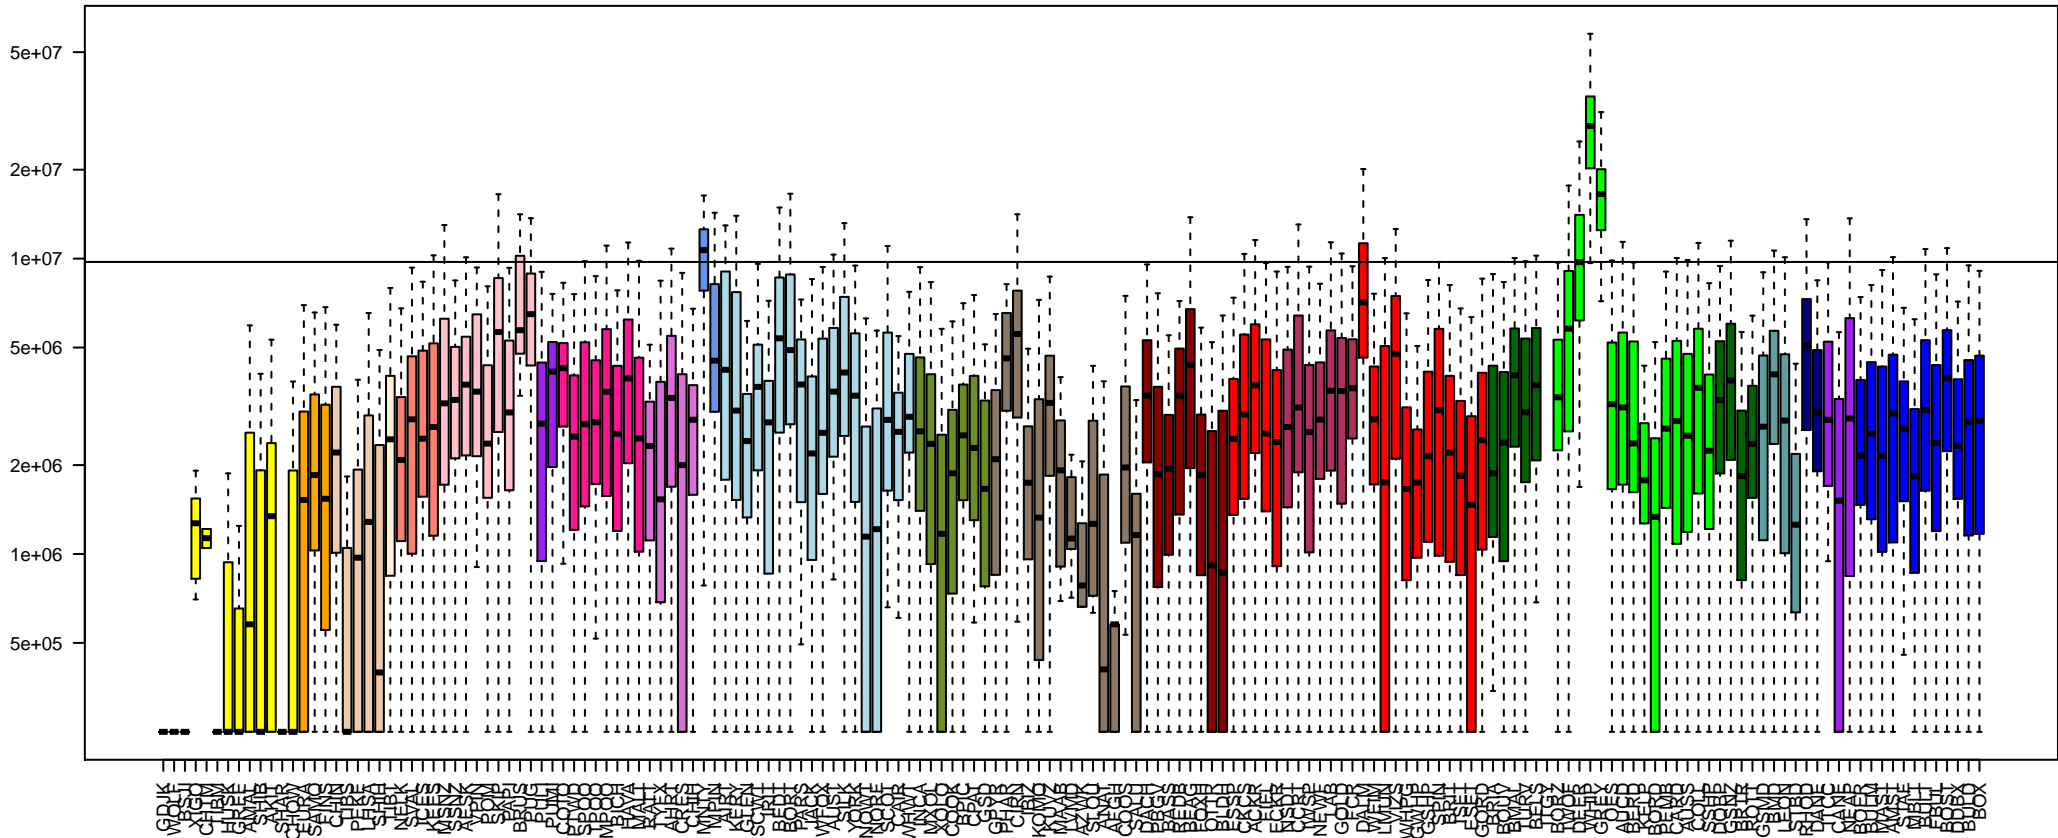



# Japanese Chin

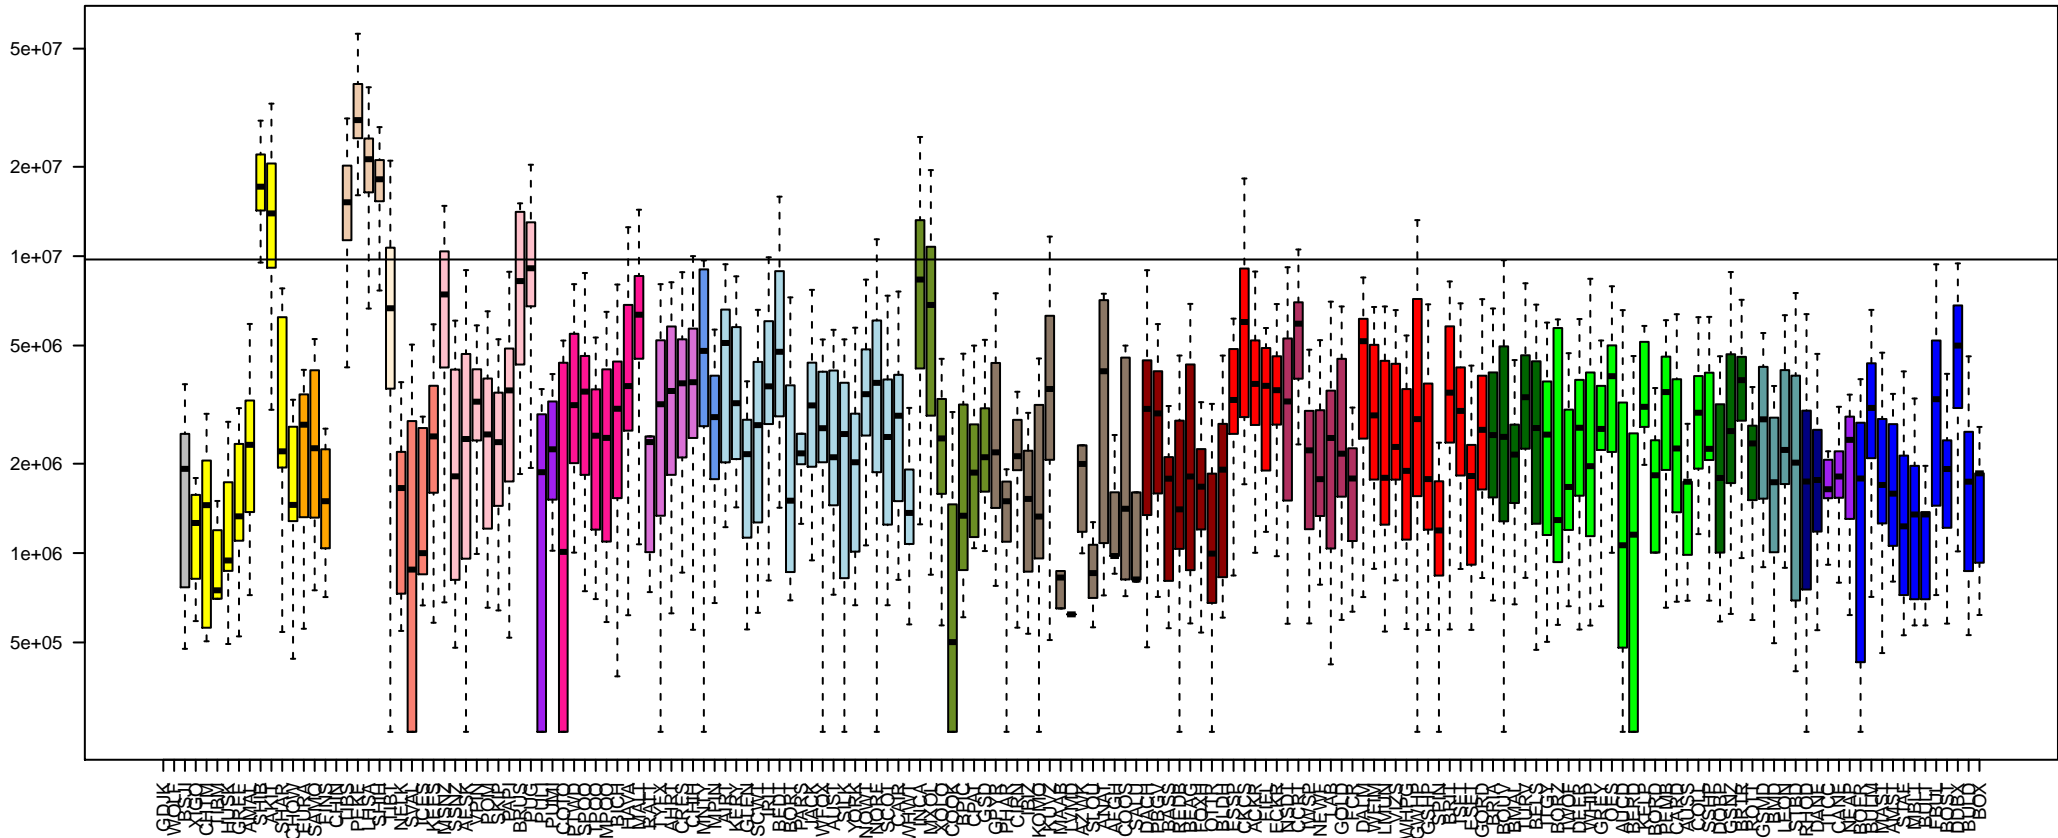

# Keeshond

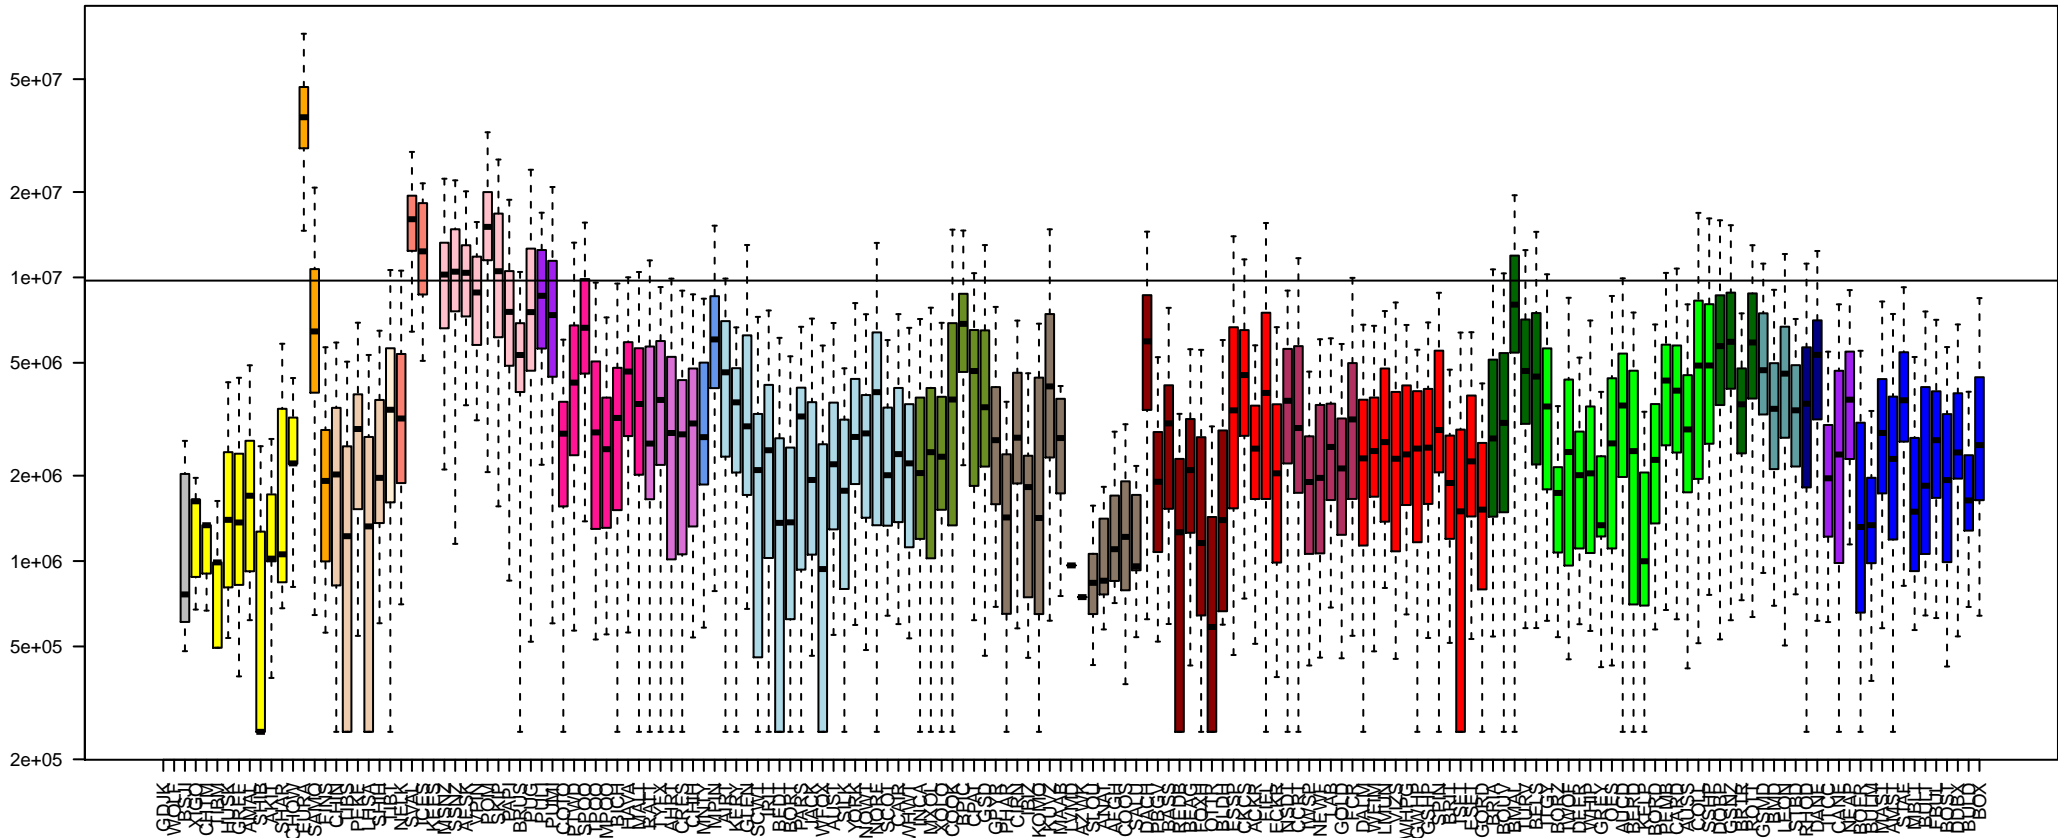

# Kelpie

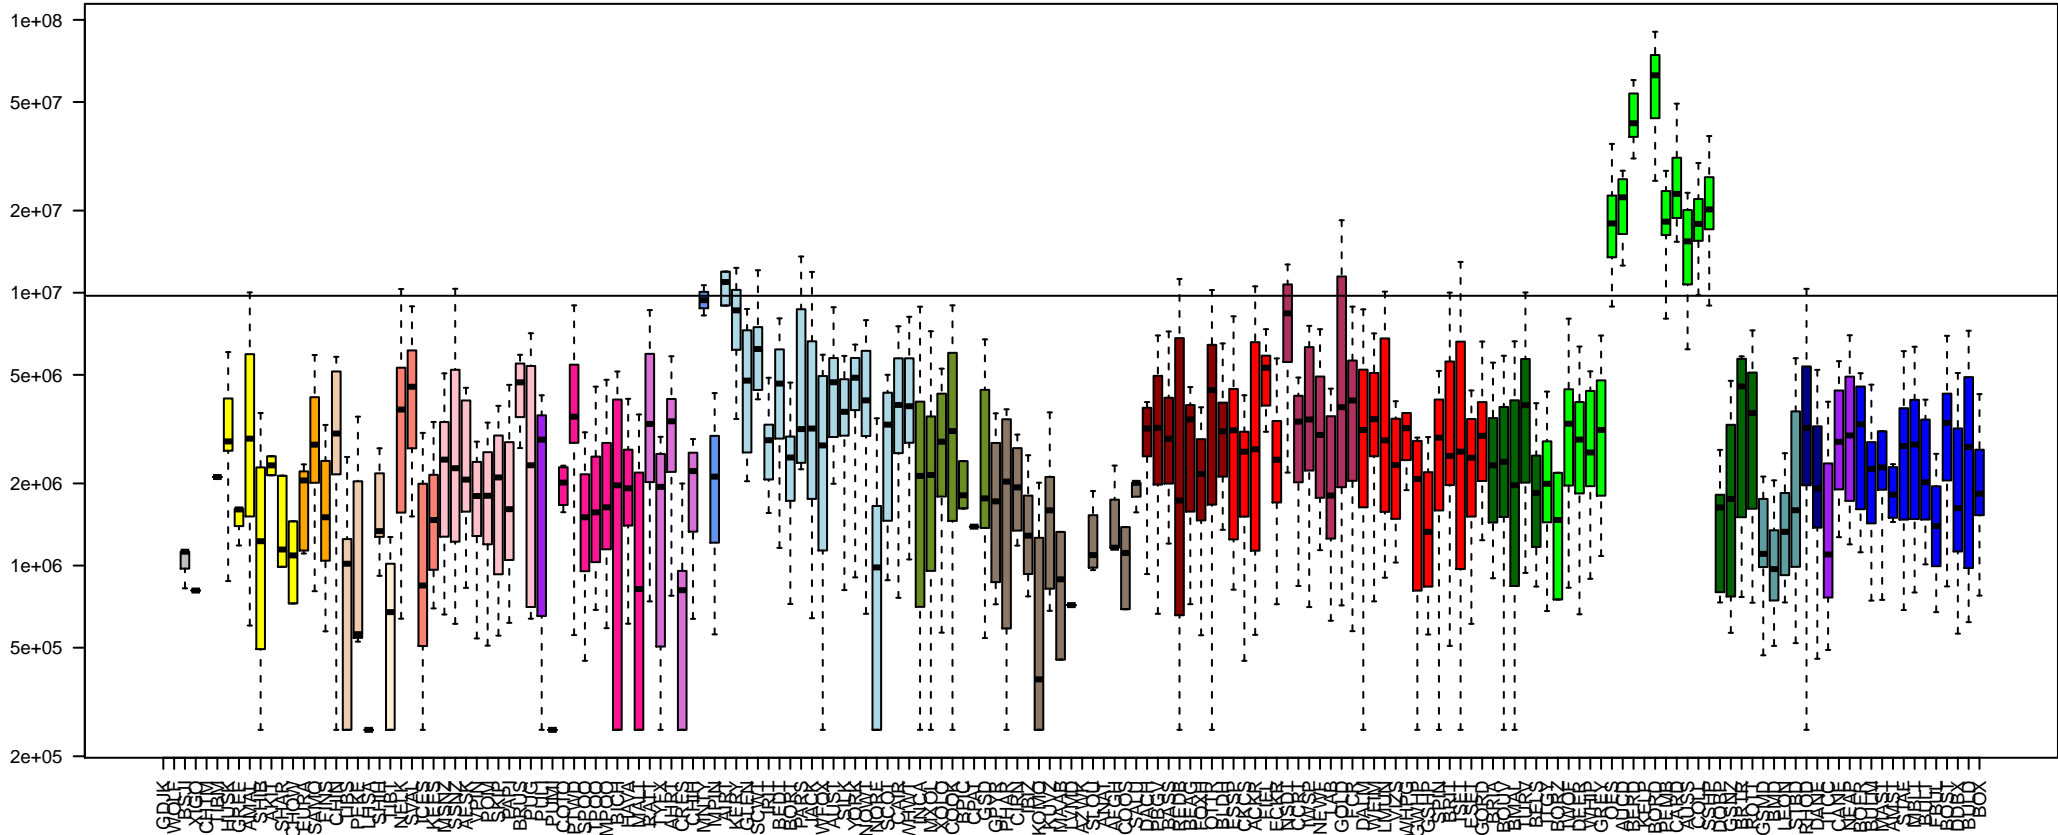

# Kerry Blue Terrier

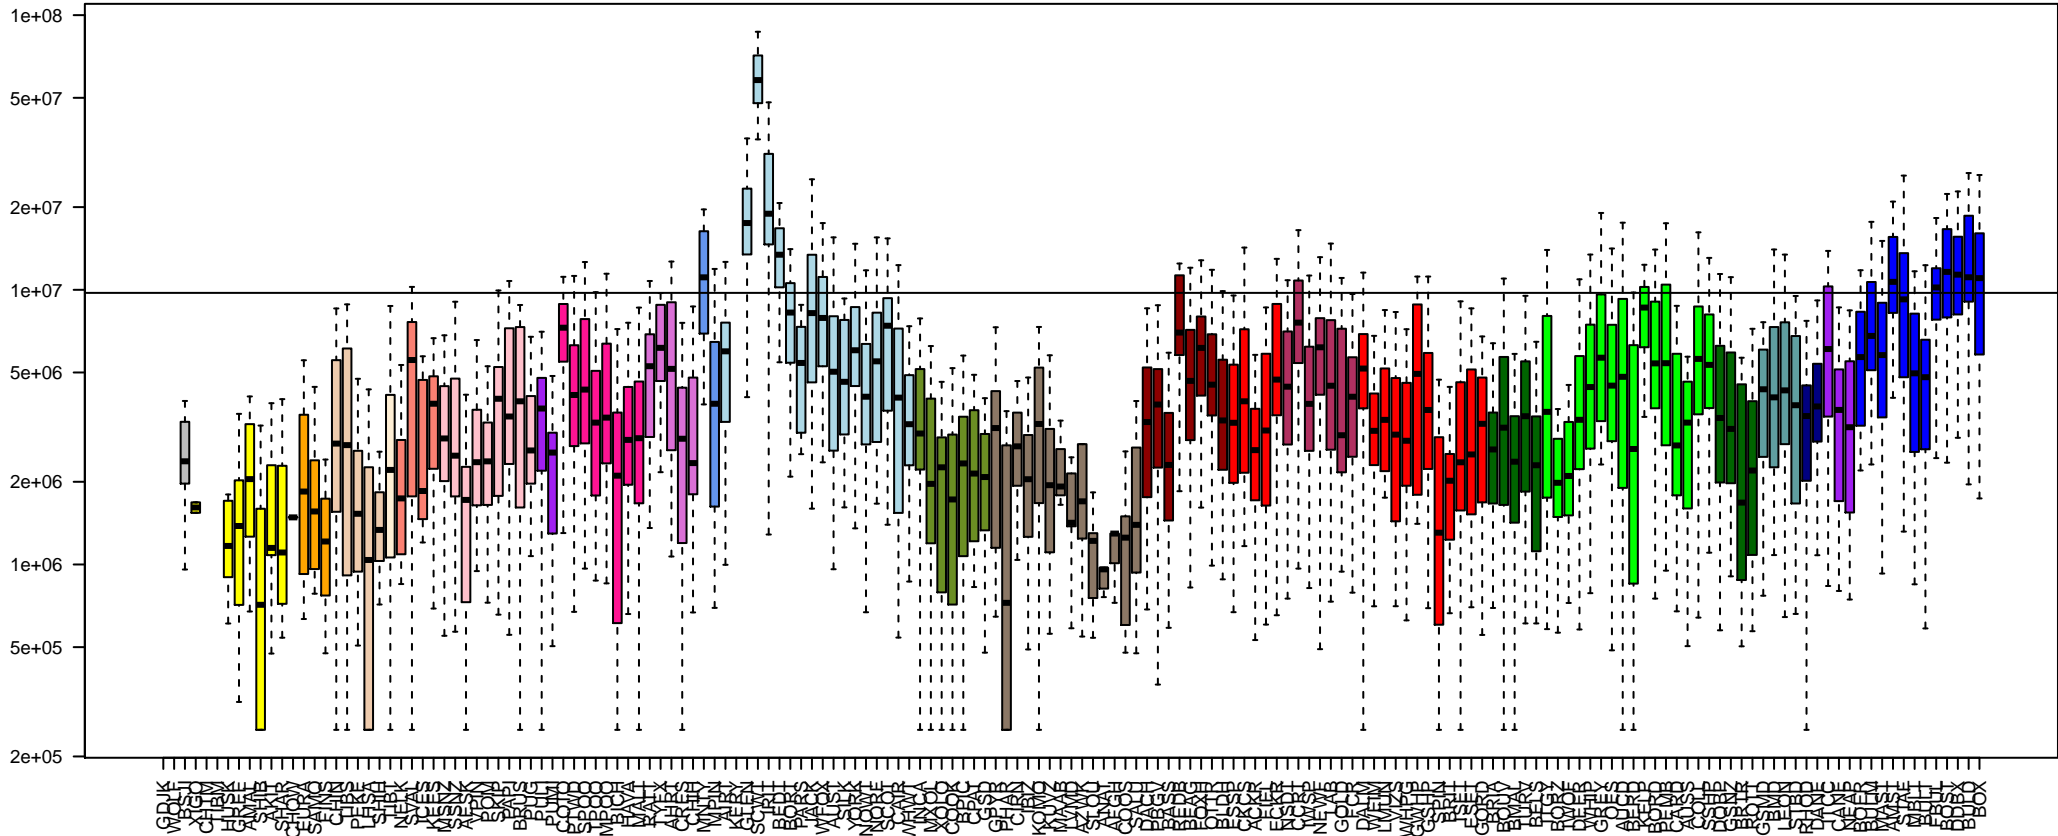







# Labrador Retriever

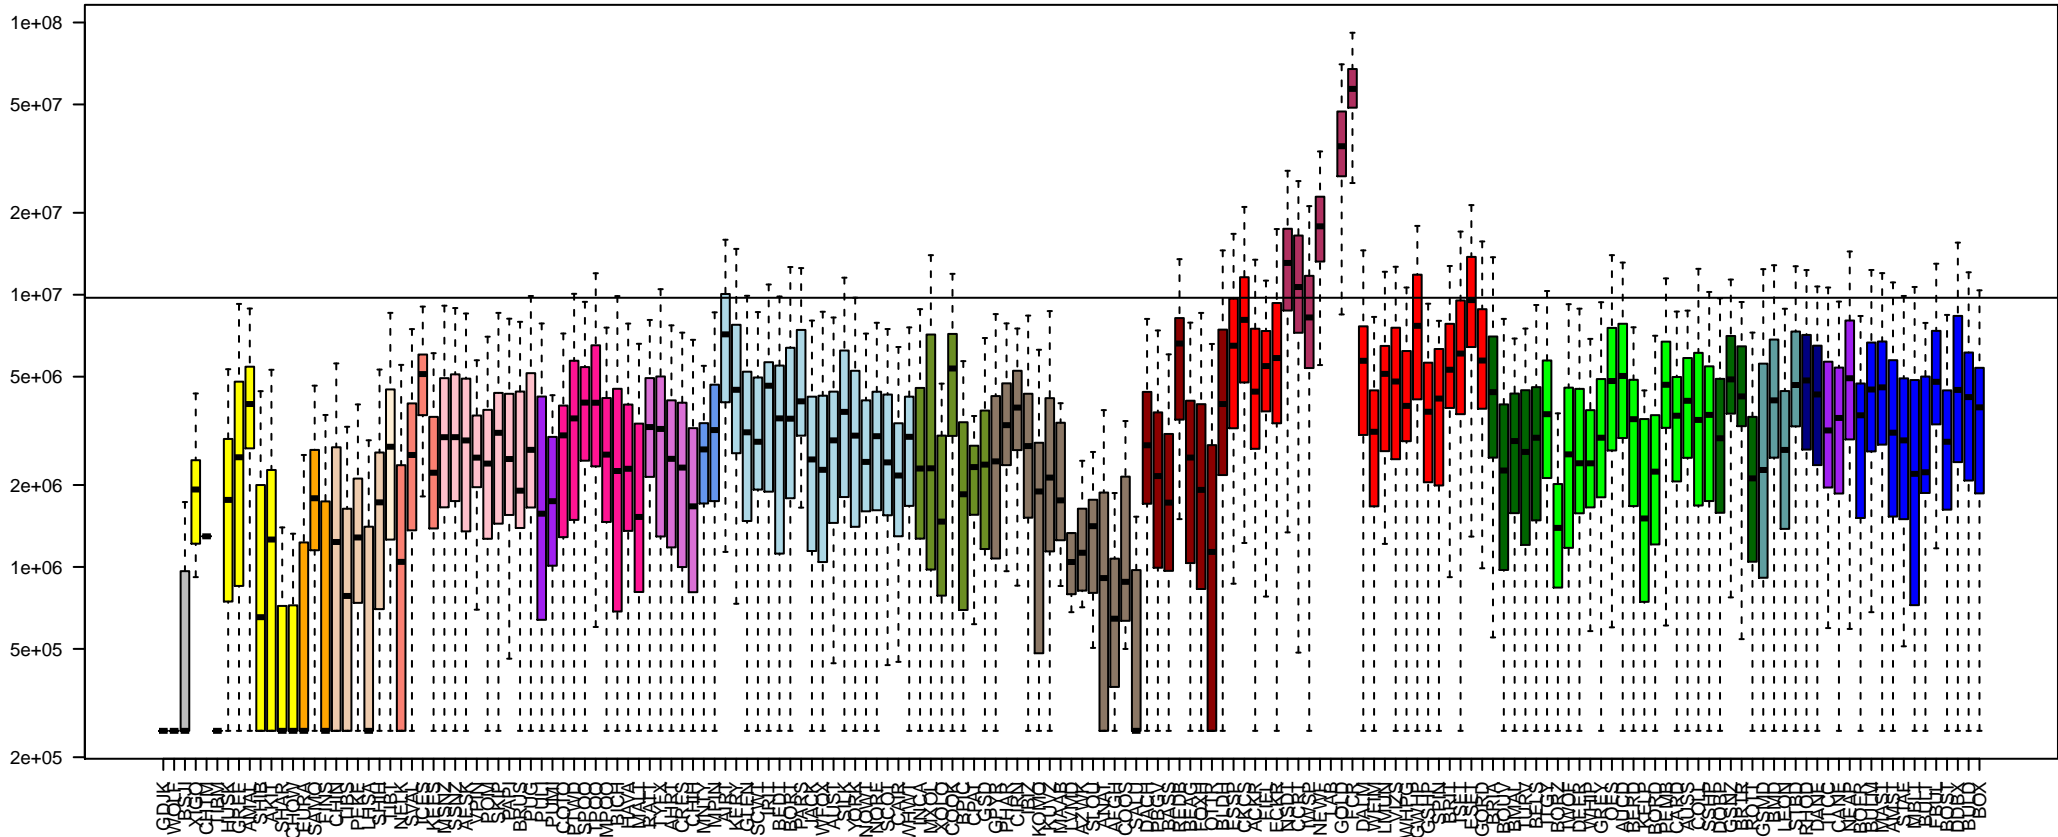



# Leonberger

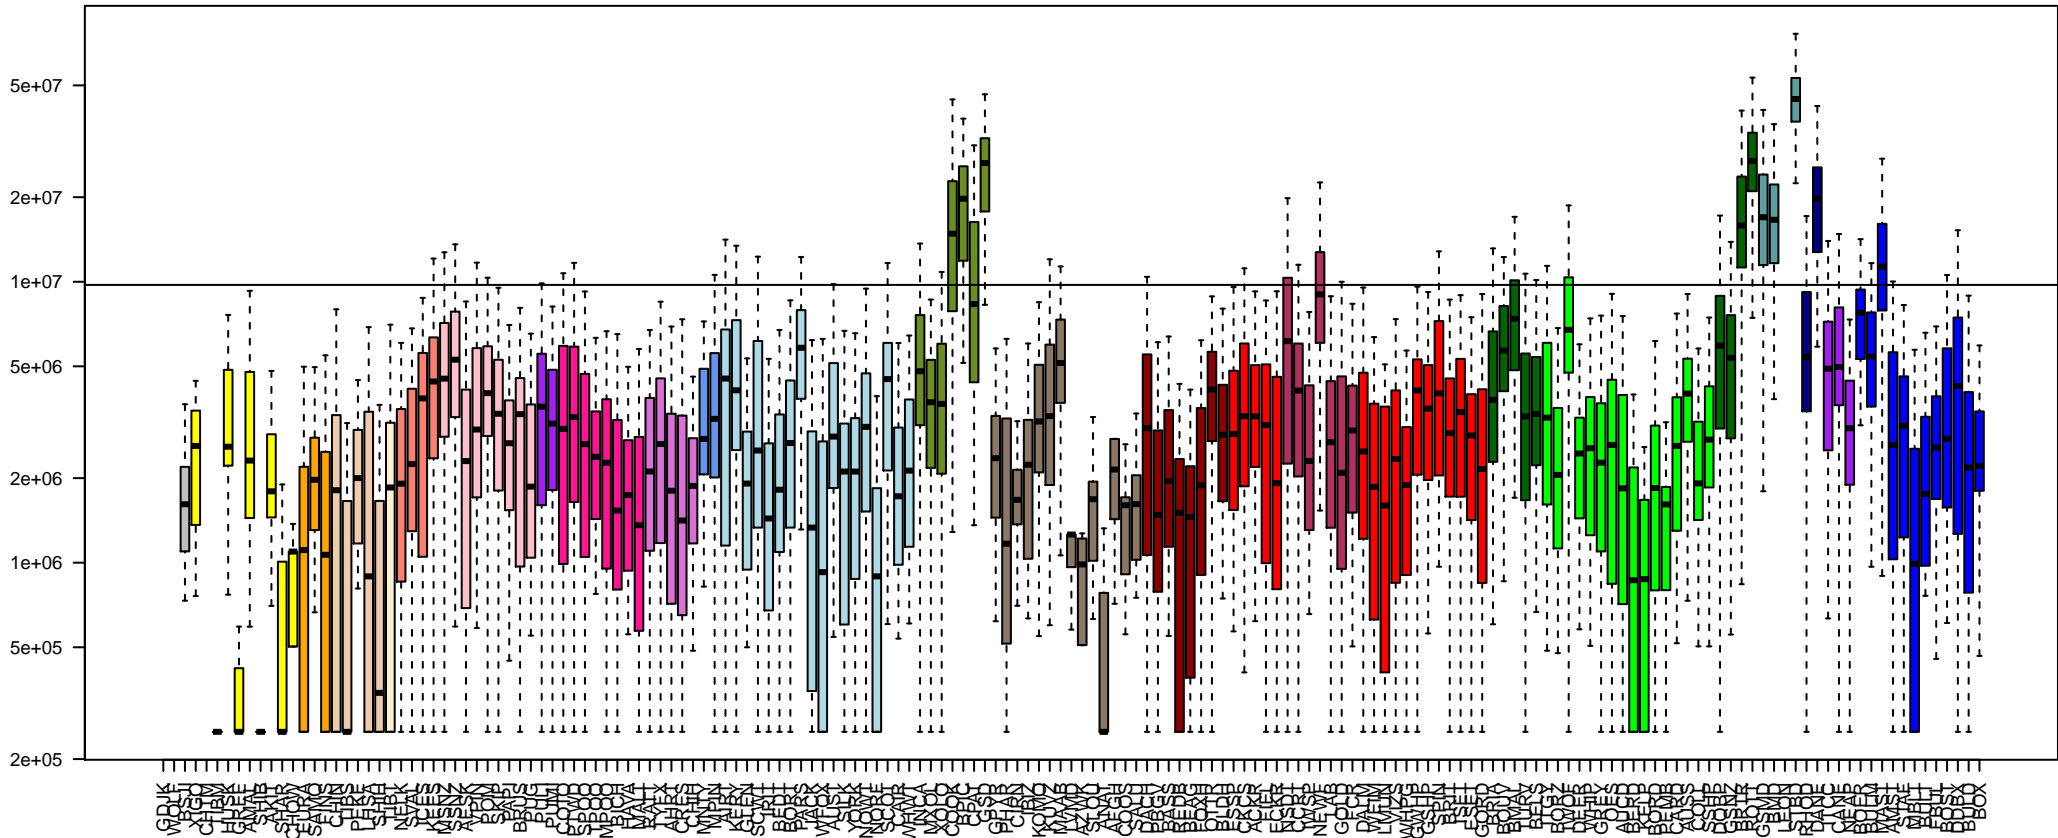

# Leviero Meridionale

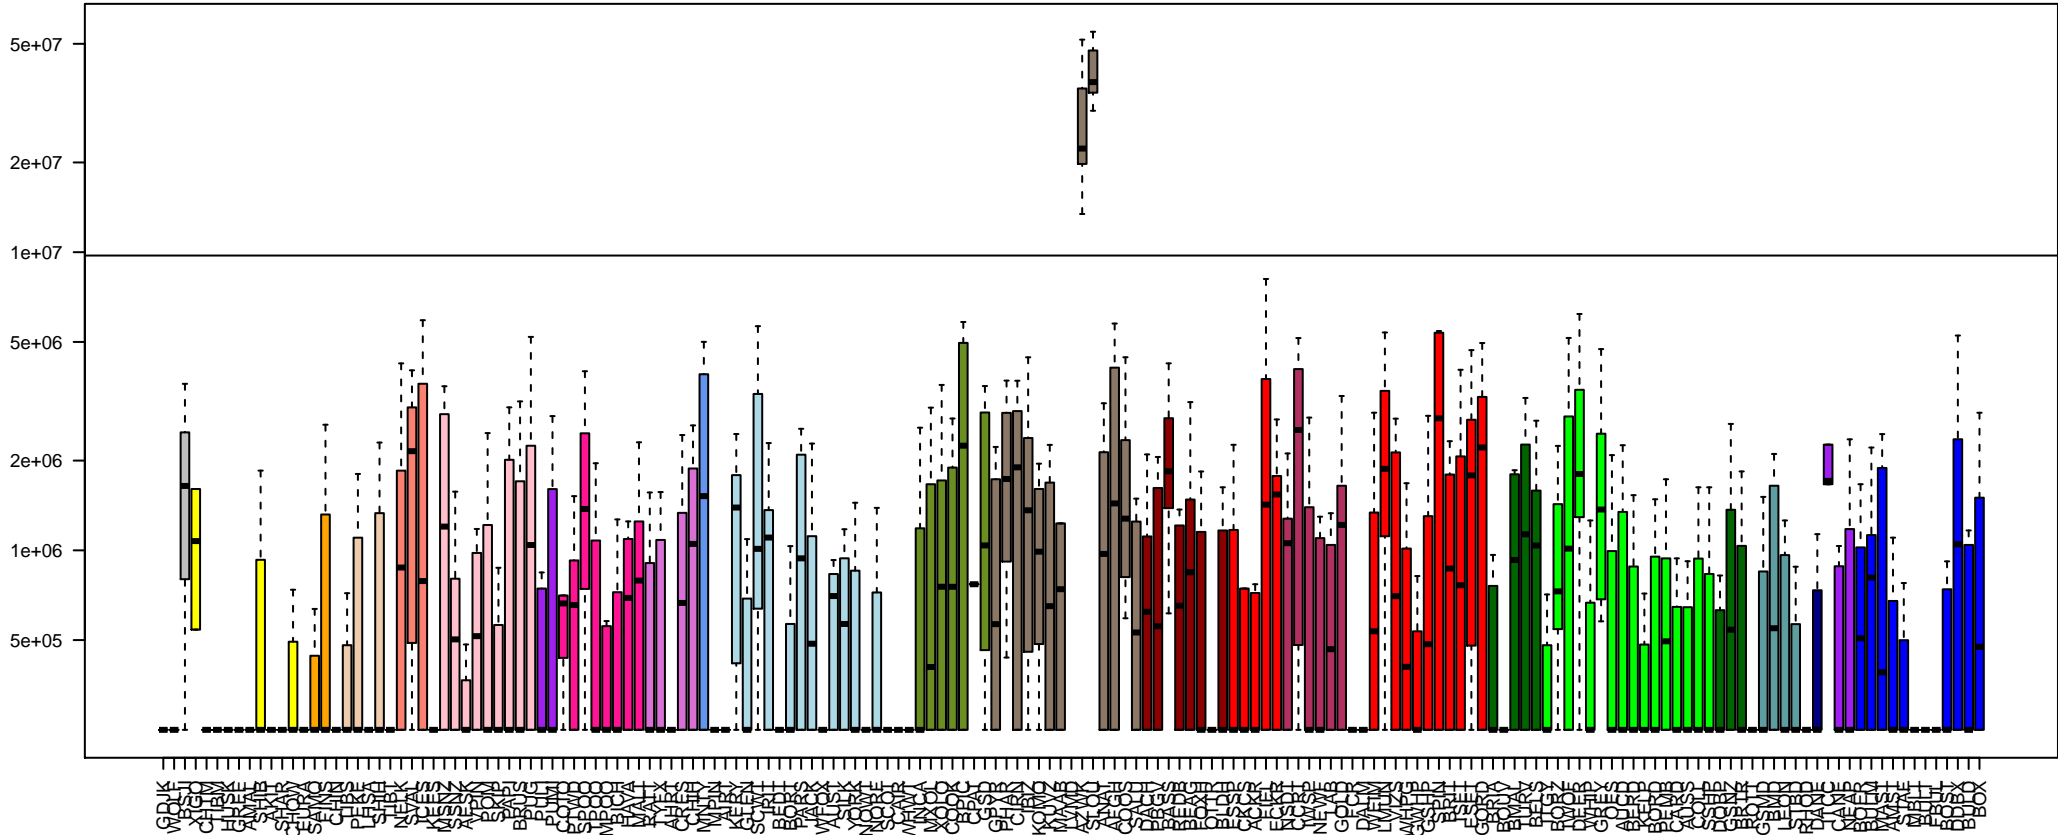

# Lhasa Apso

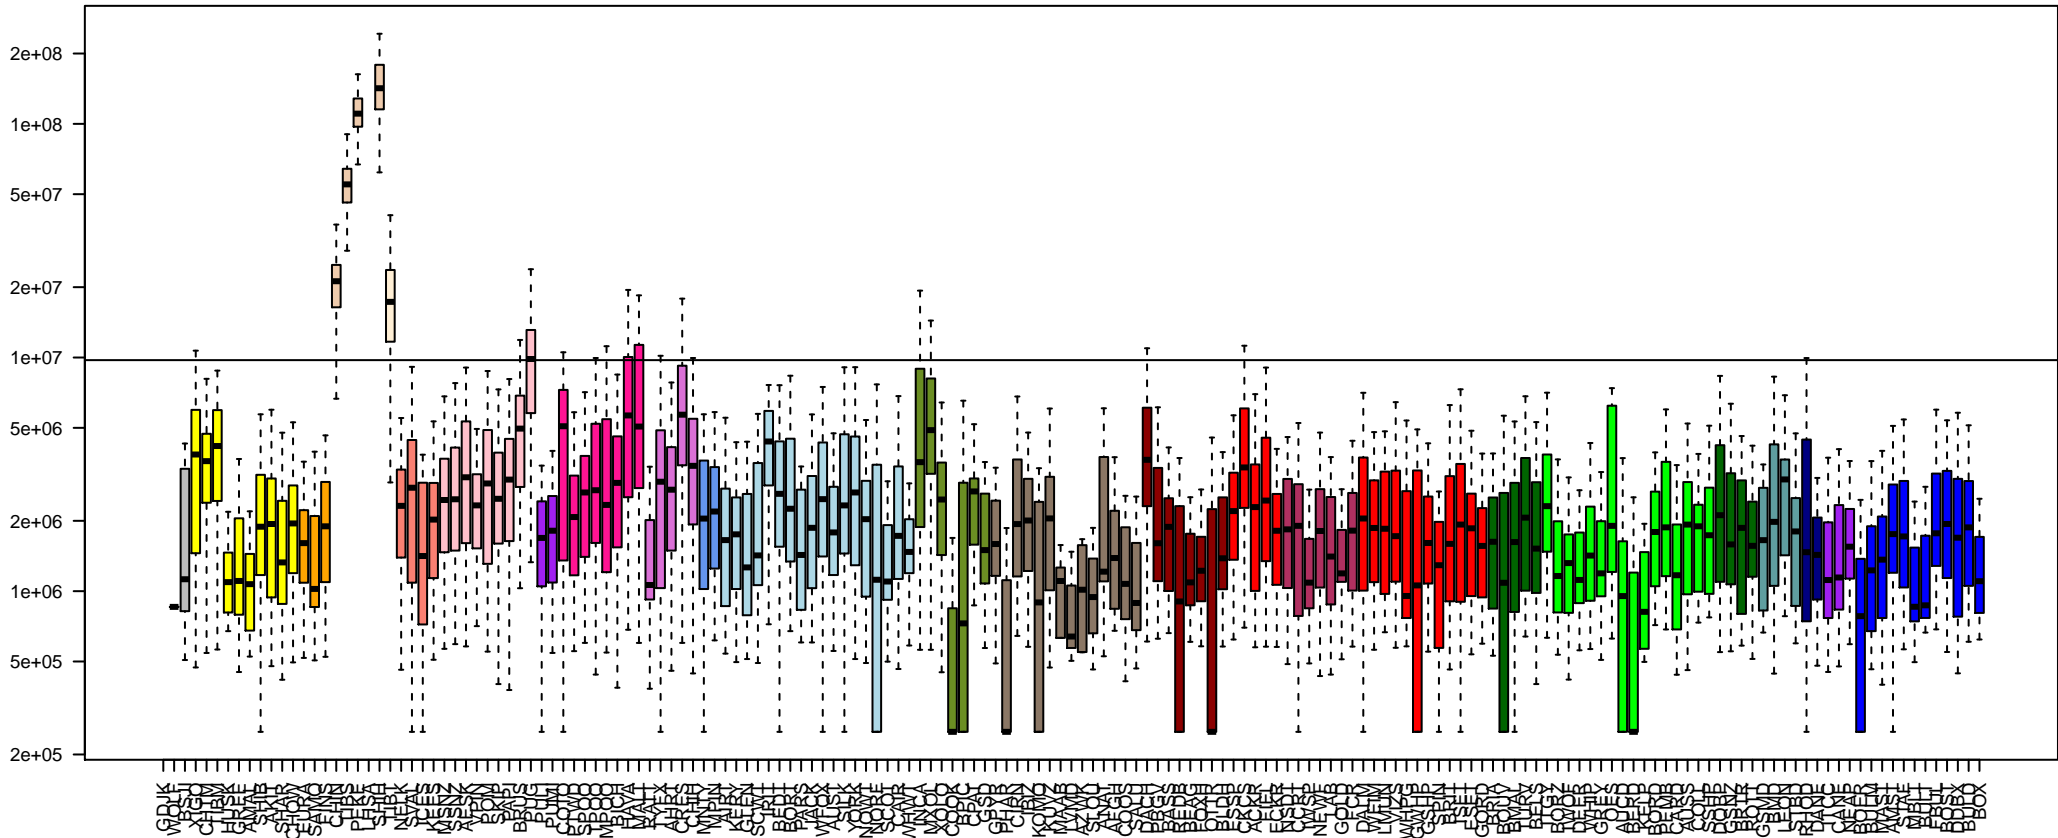

# Maltese

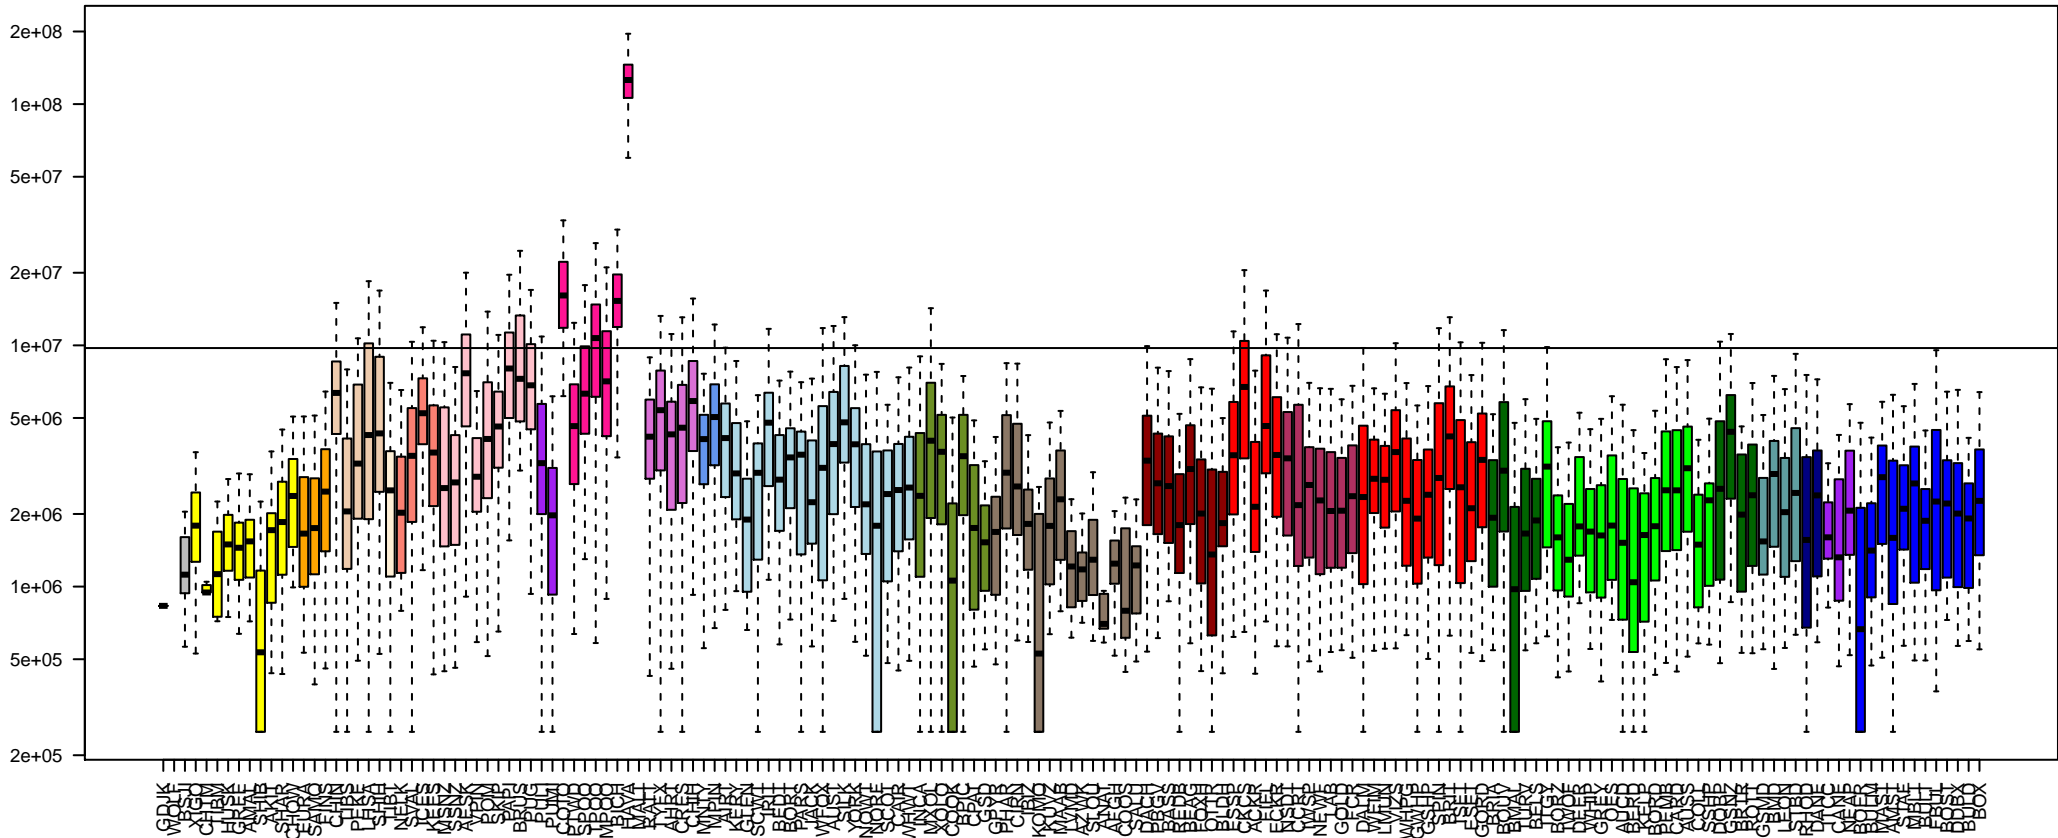



# Mastiff

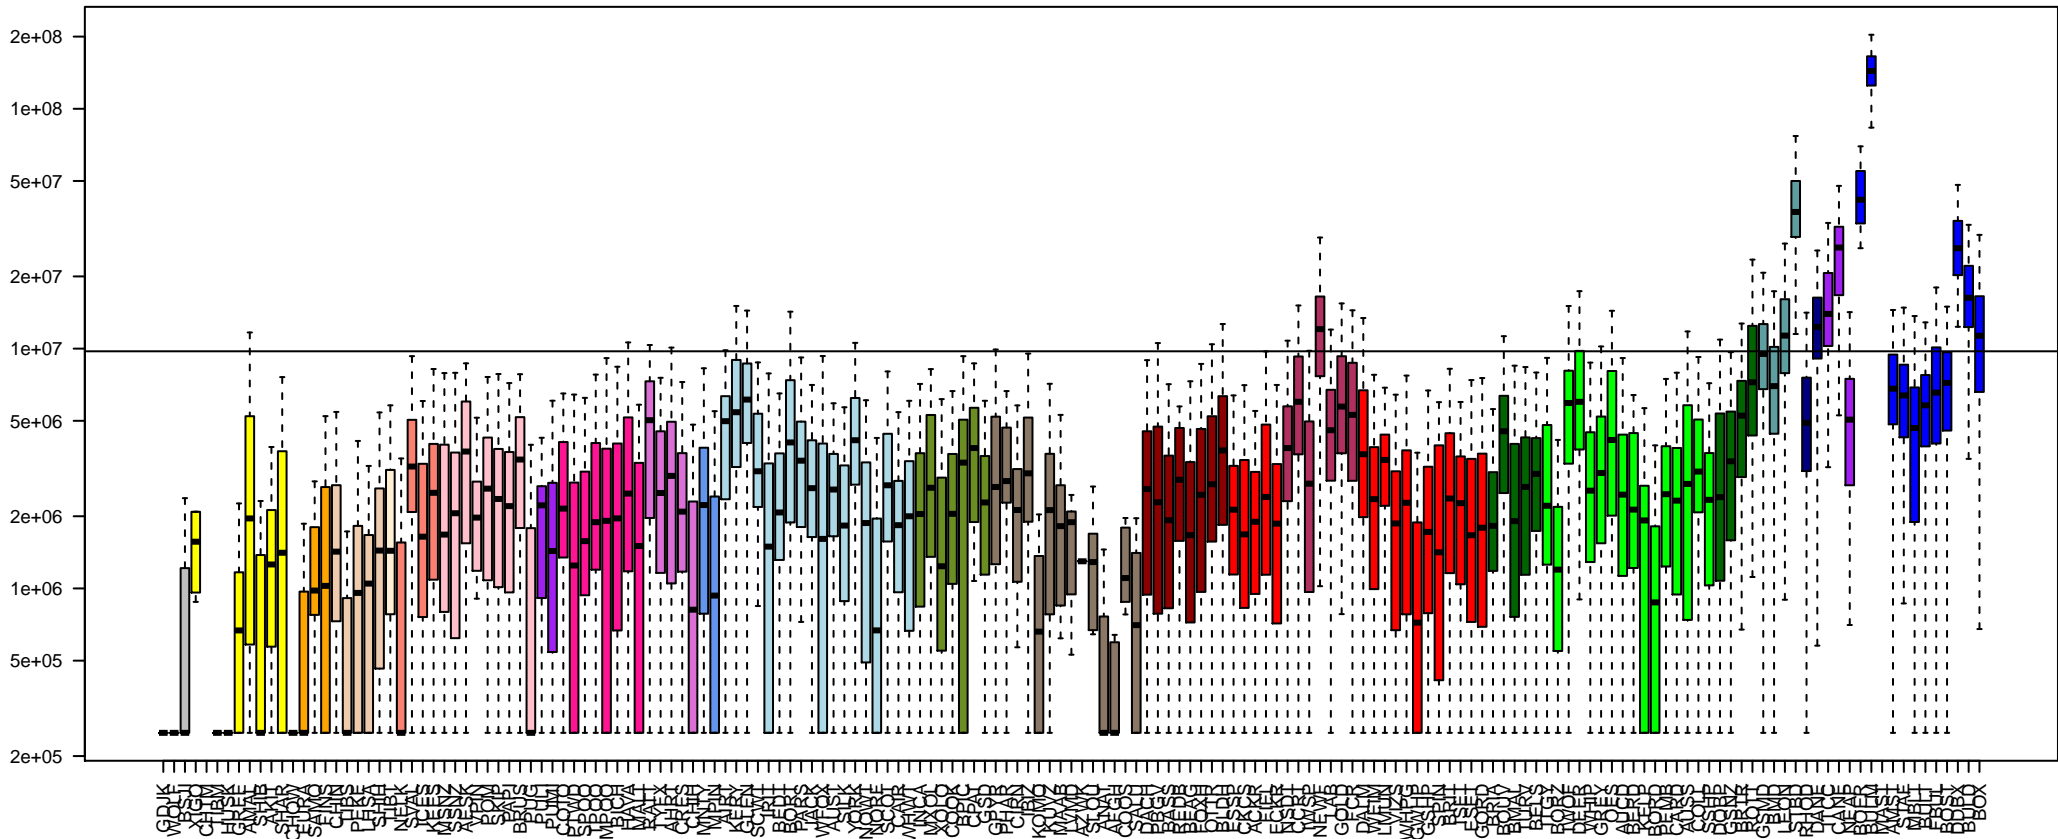





# Miniature Bull Terrier

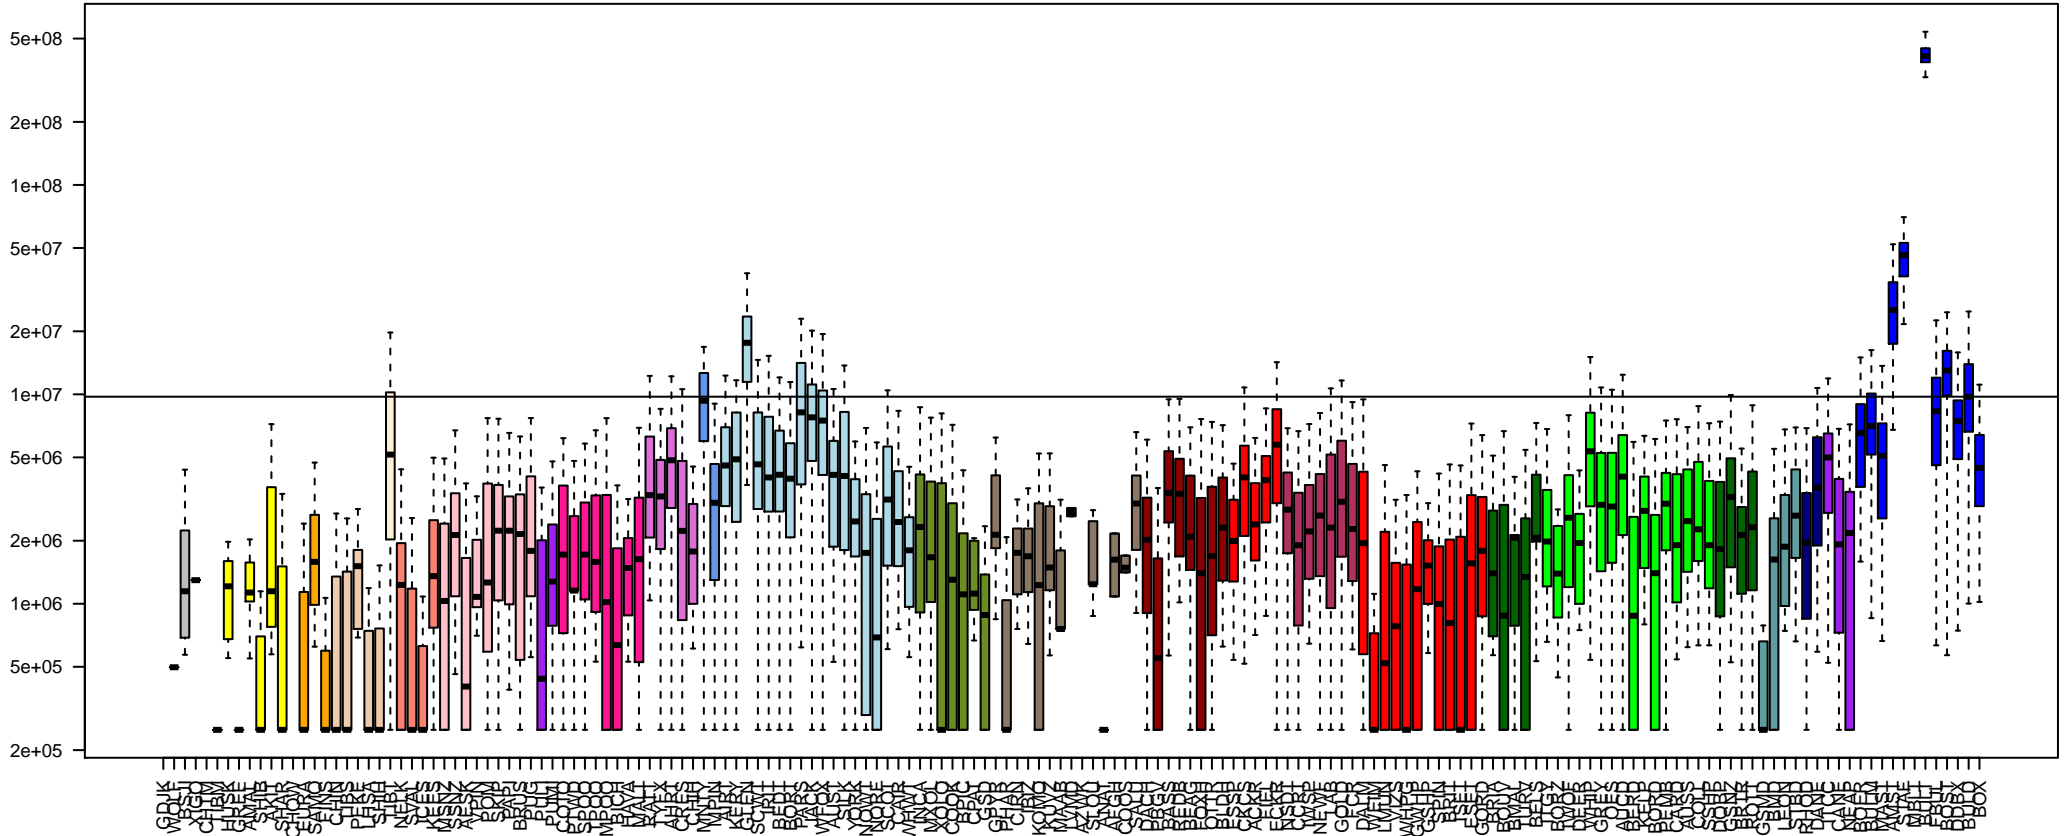







# Neapolitan Mastiff

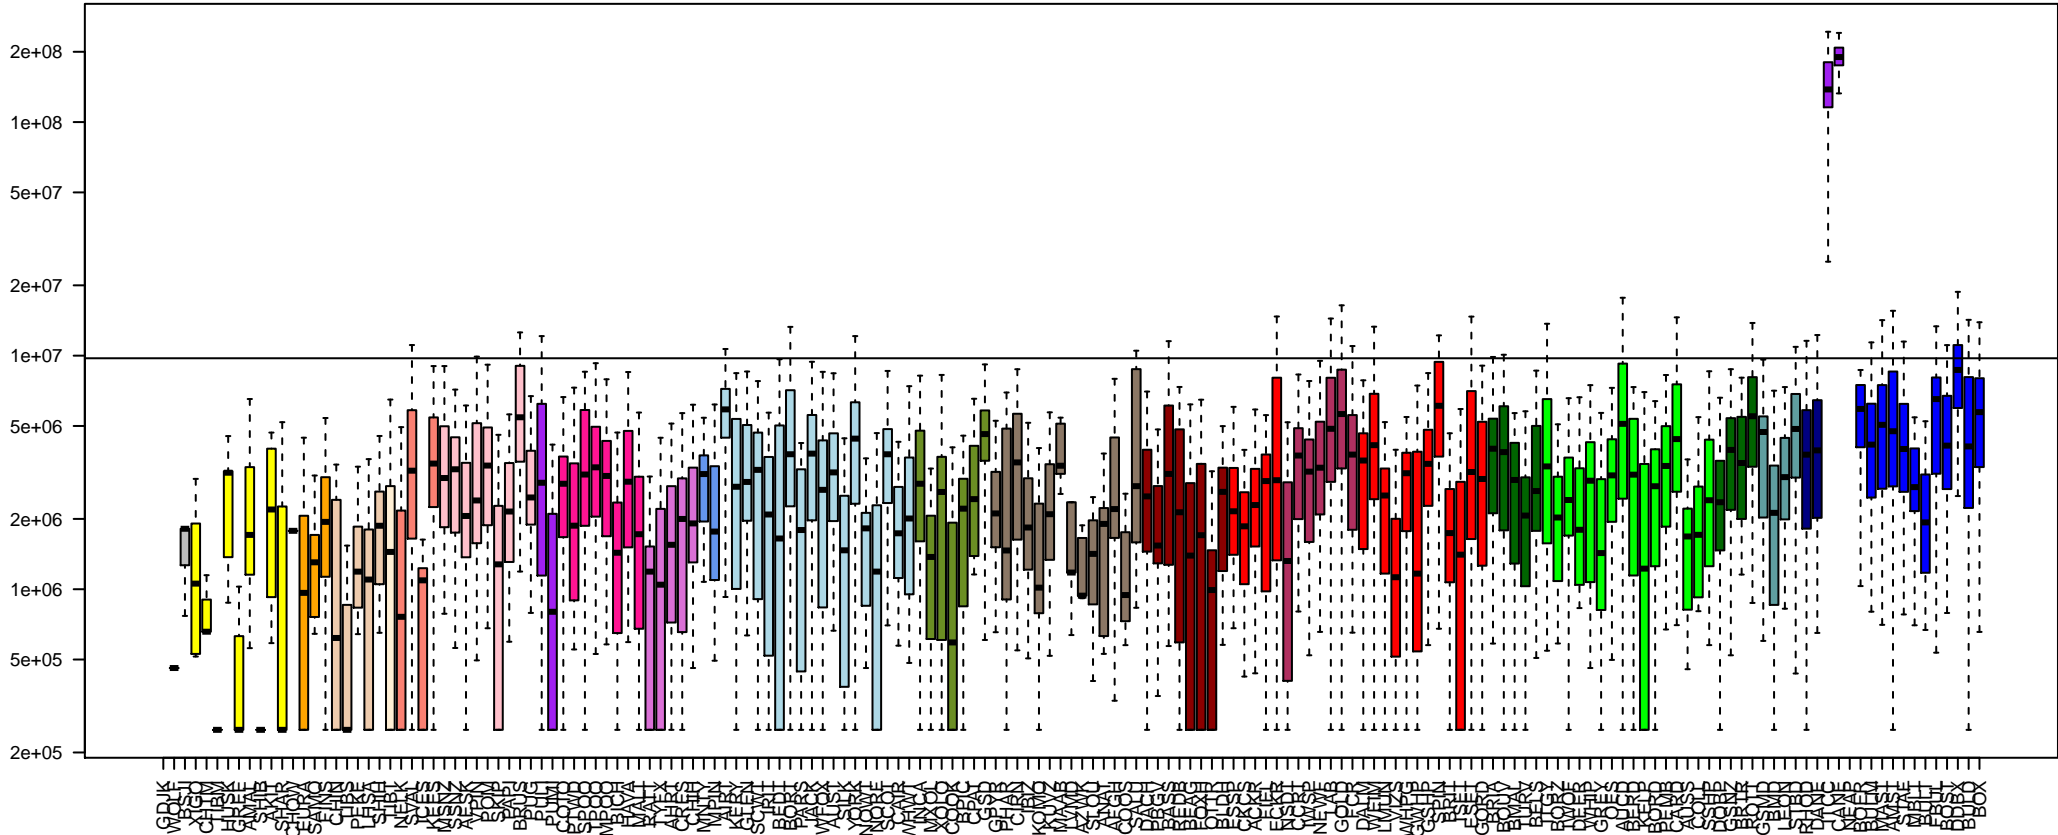

# Newfoundland

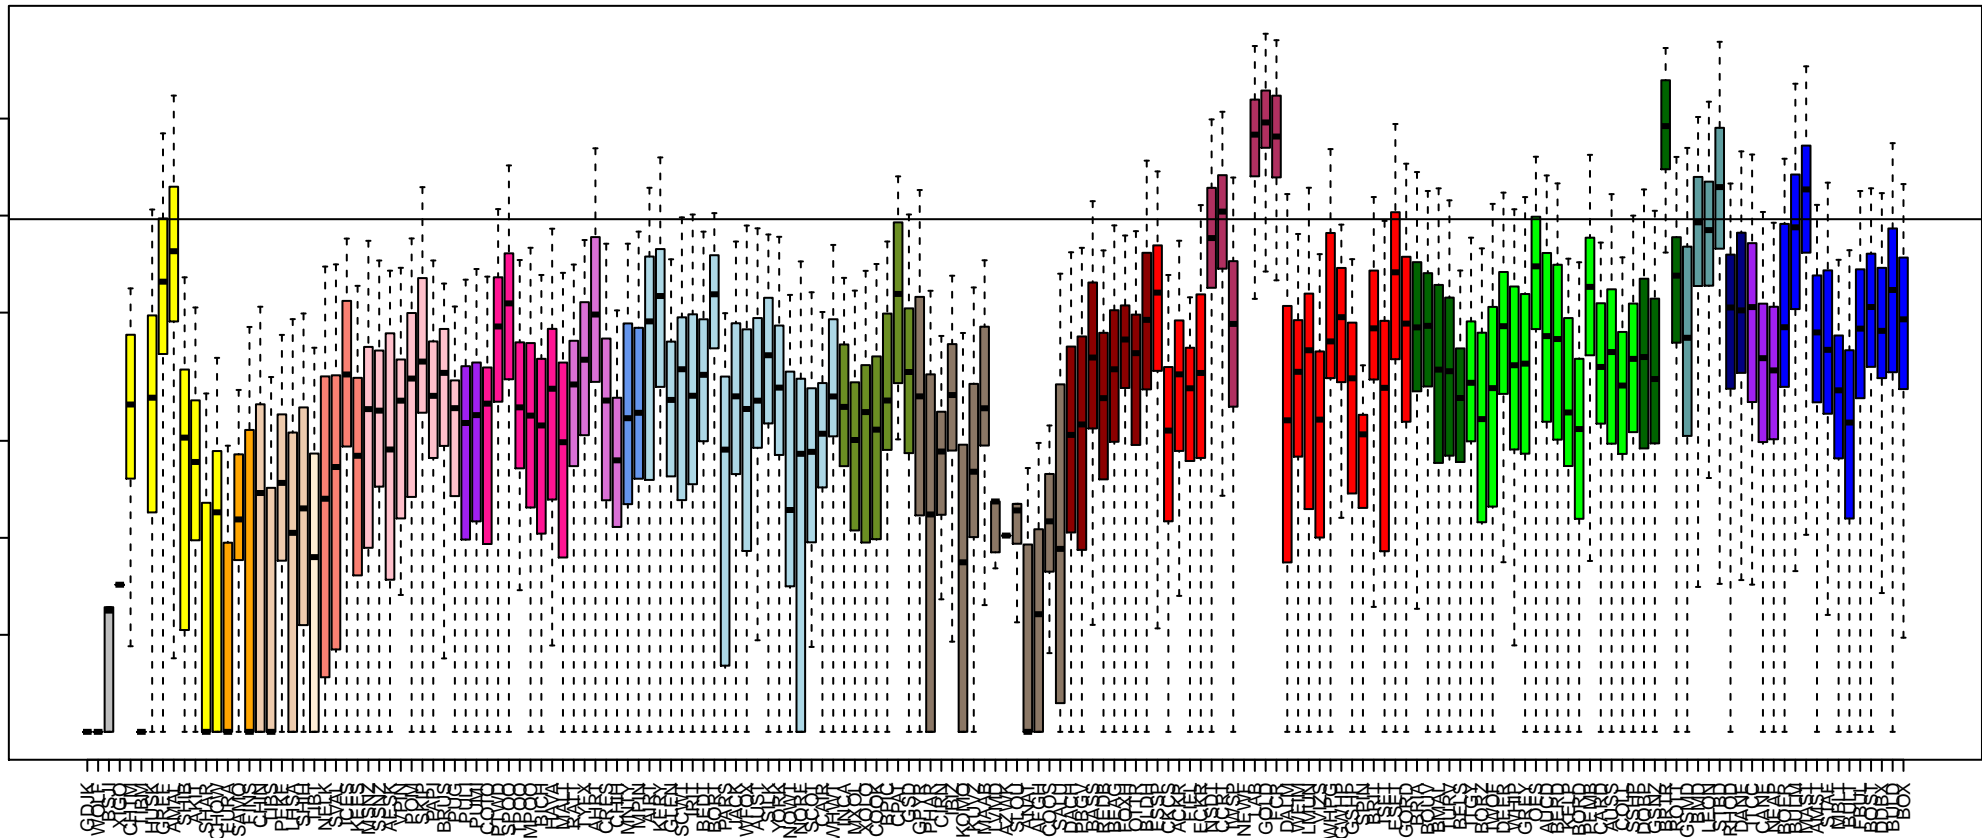

# Norfolk Terrier

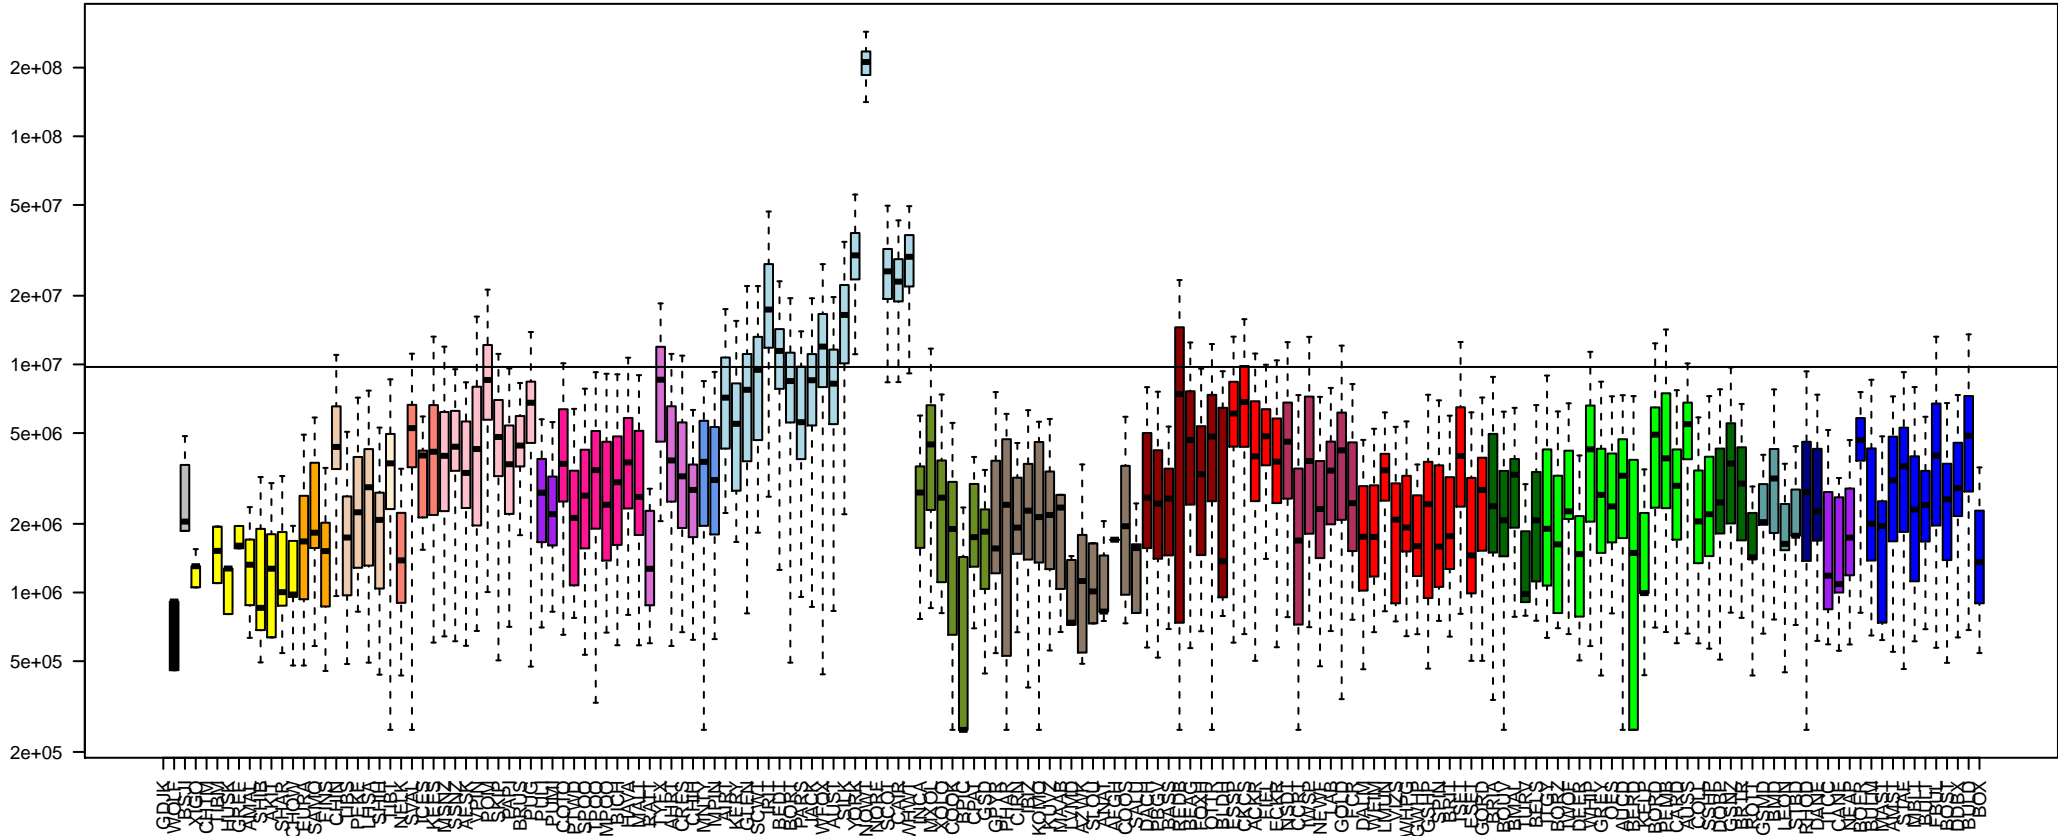



# Norwegian Elkhound

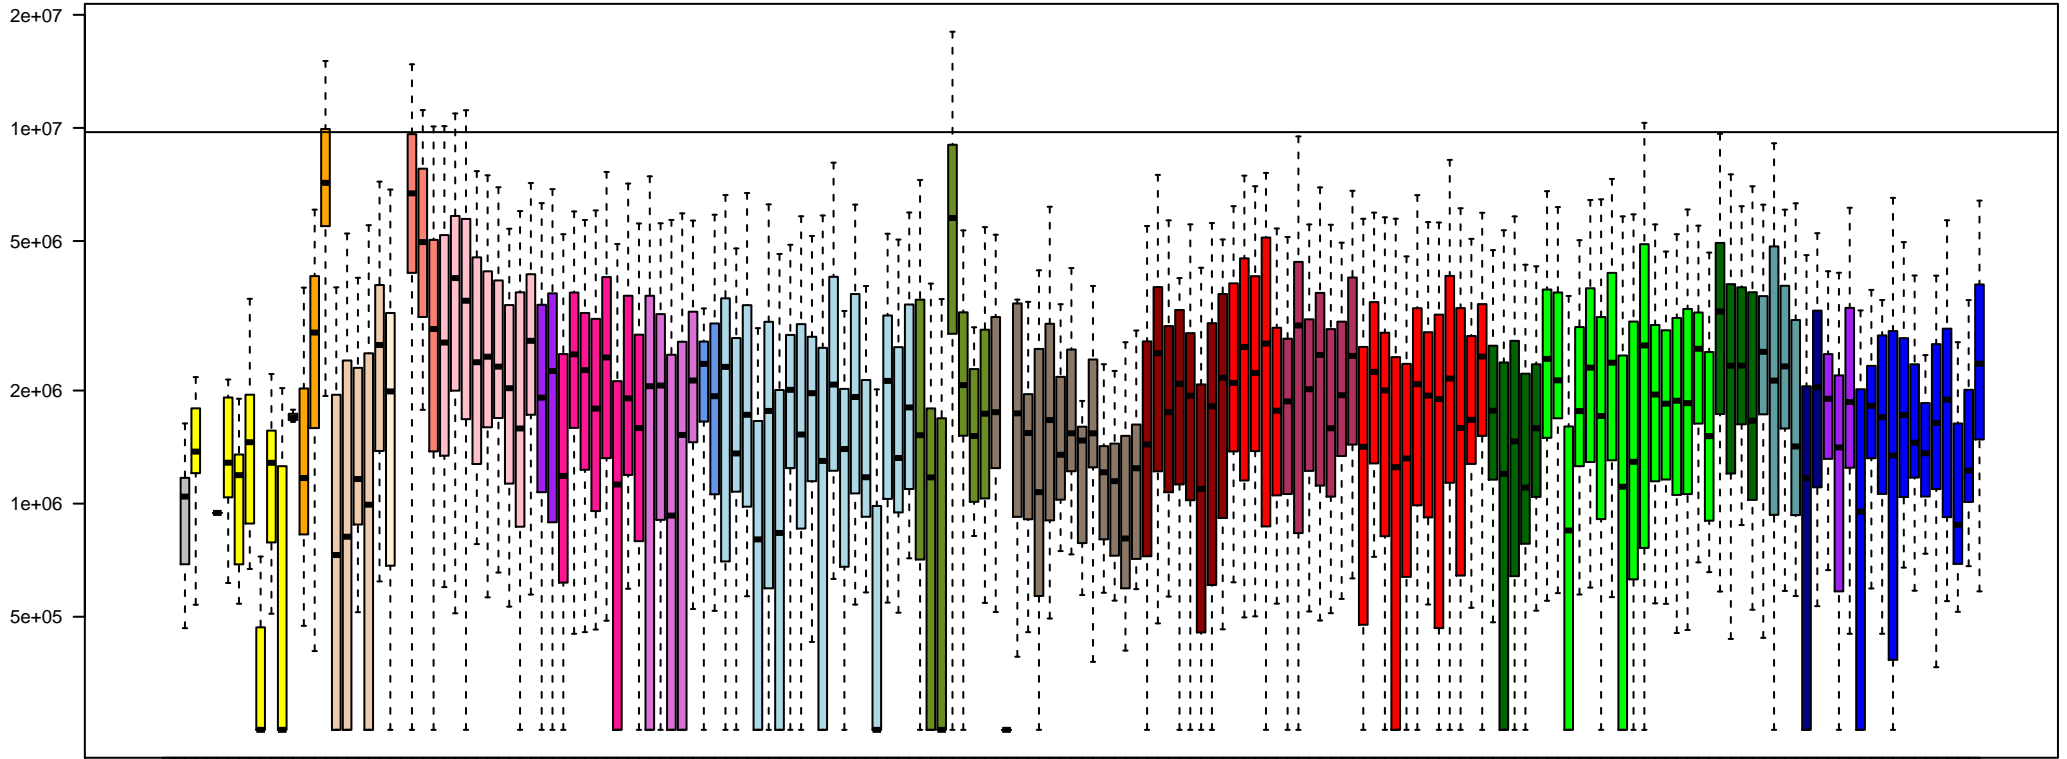

1 2 3 4 5 6 7 8 9 10 11 12 13 14 15 16 17 18 19 20 21 22 23 24 25 26 27 28

# Norwich Terrier

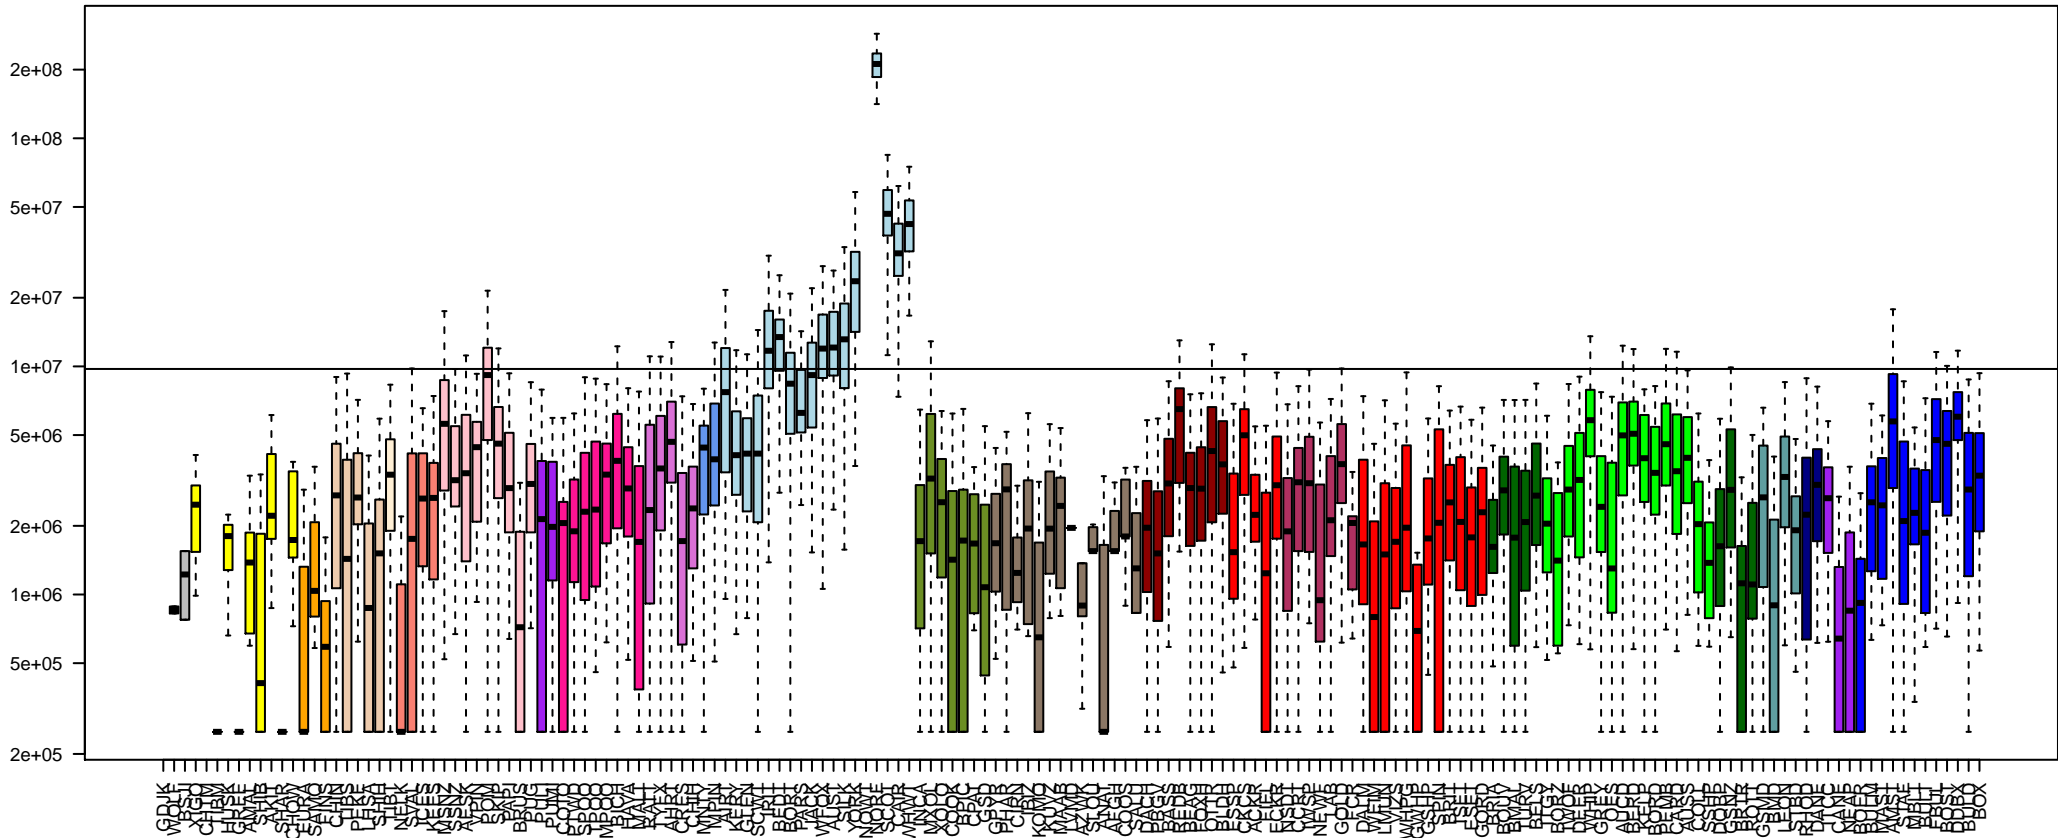





# Otterhound

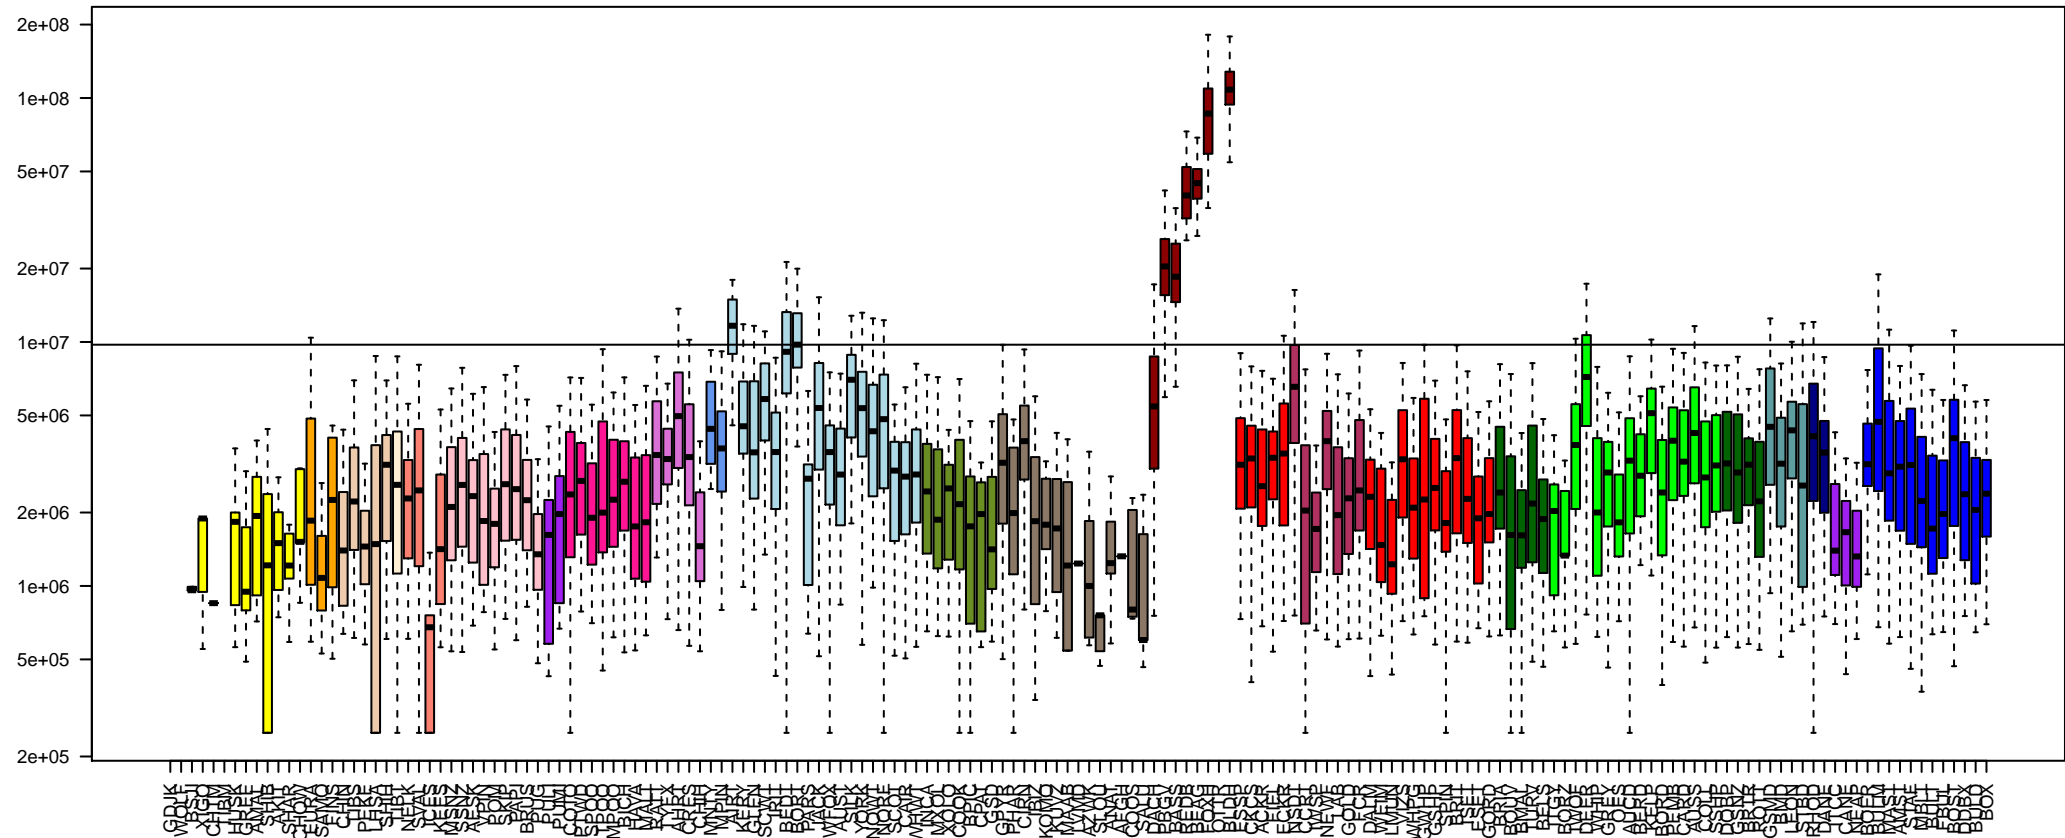



# Parson Russell Terrier

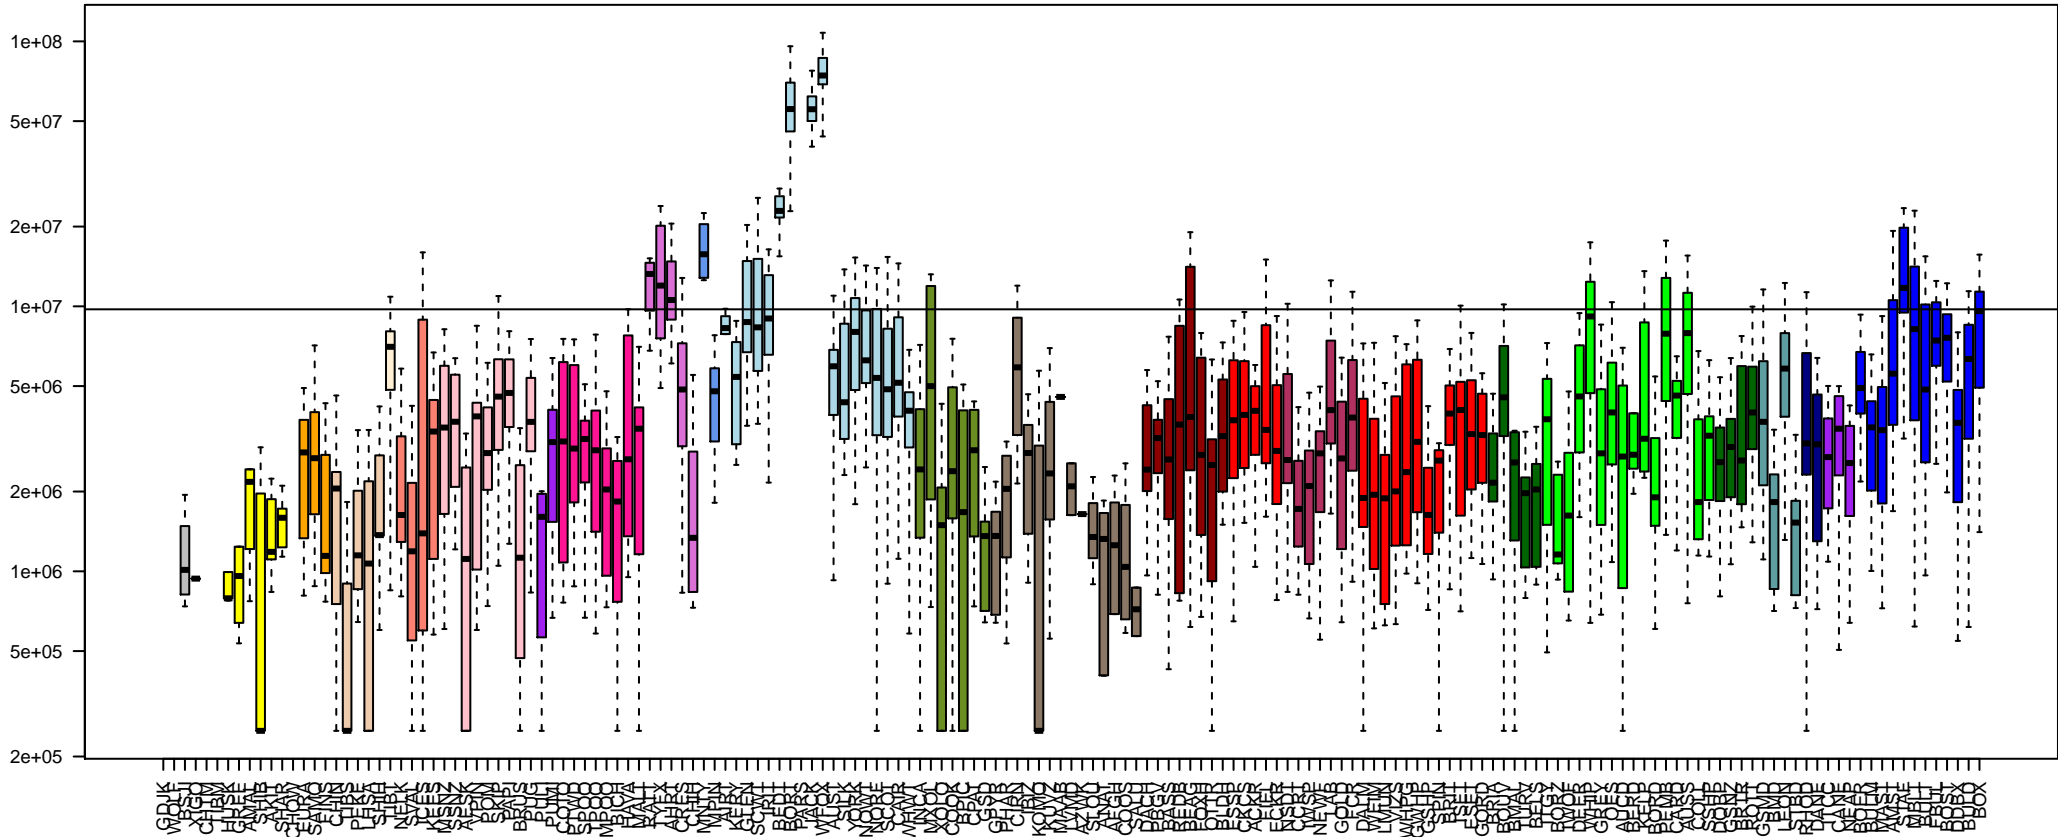

# Pekingese

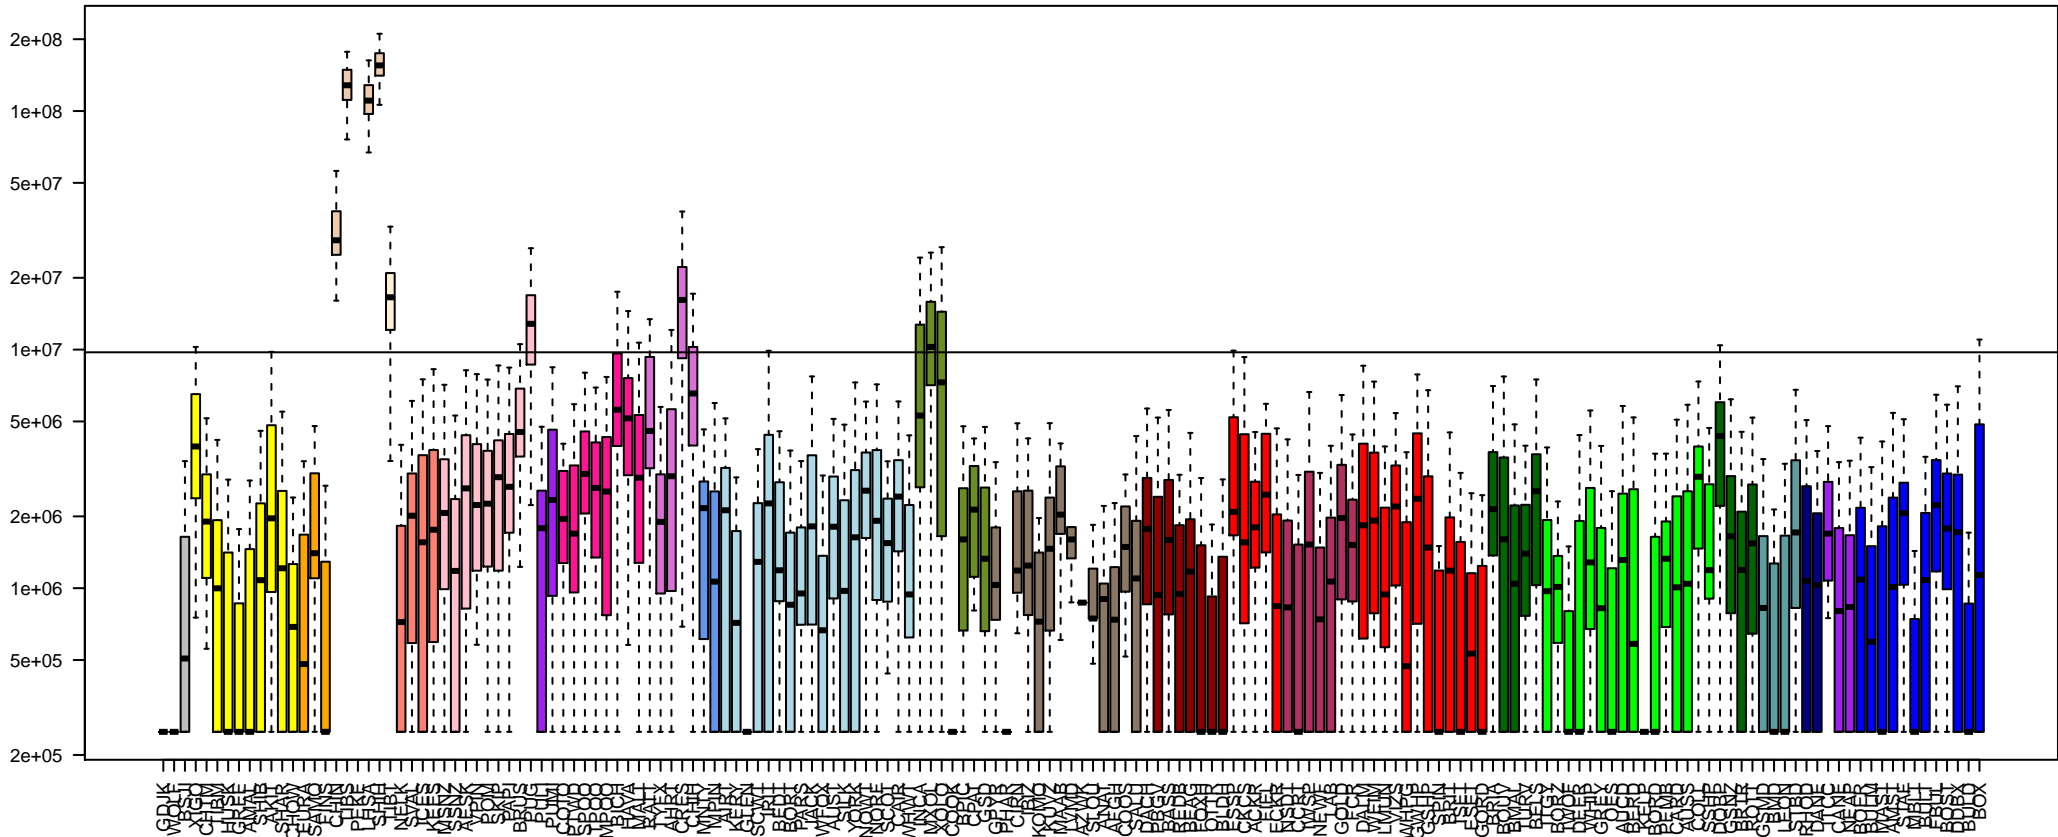





# Peruvian Hairless Dog

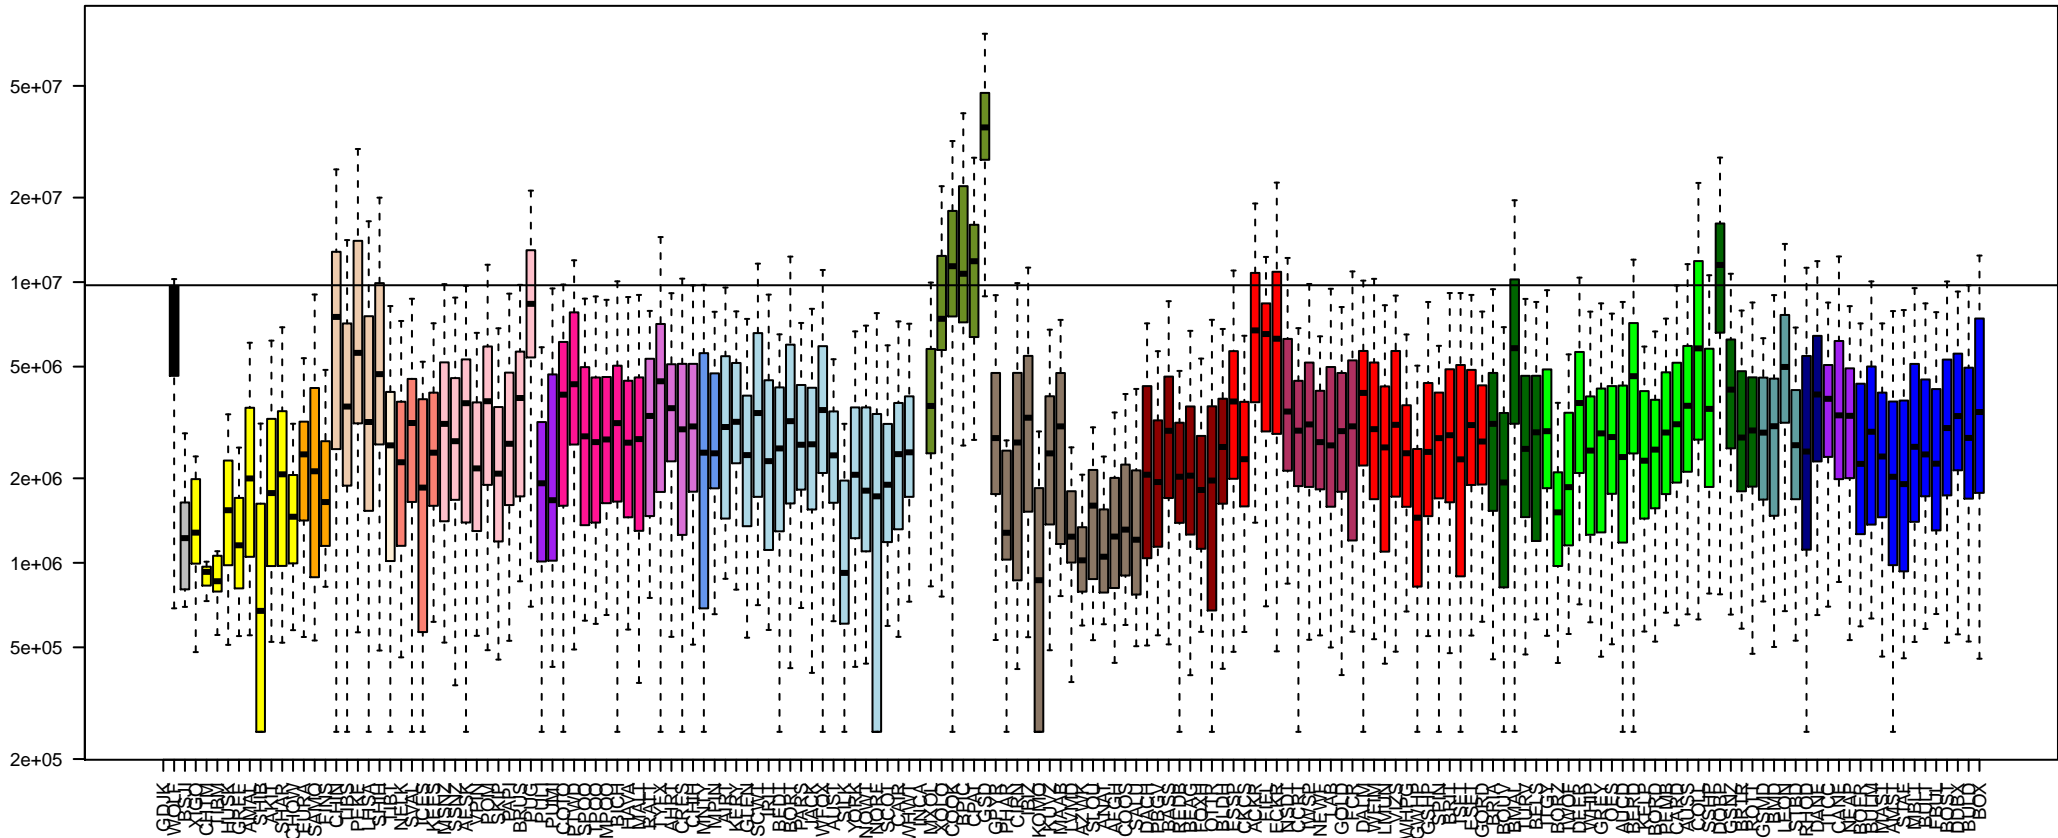

# Petit Basset Griffon Vendéen

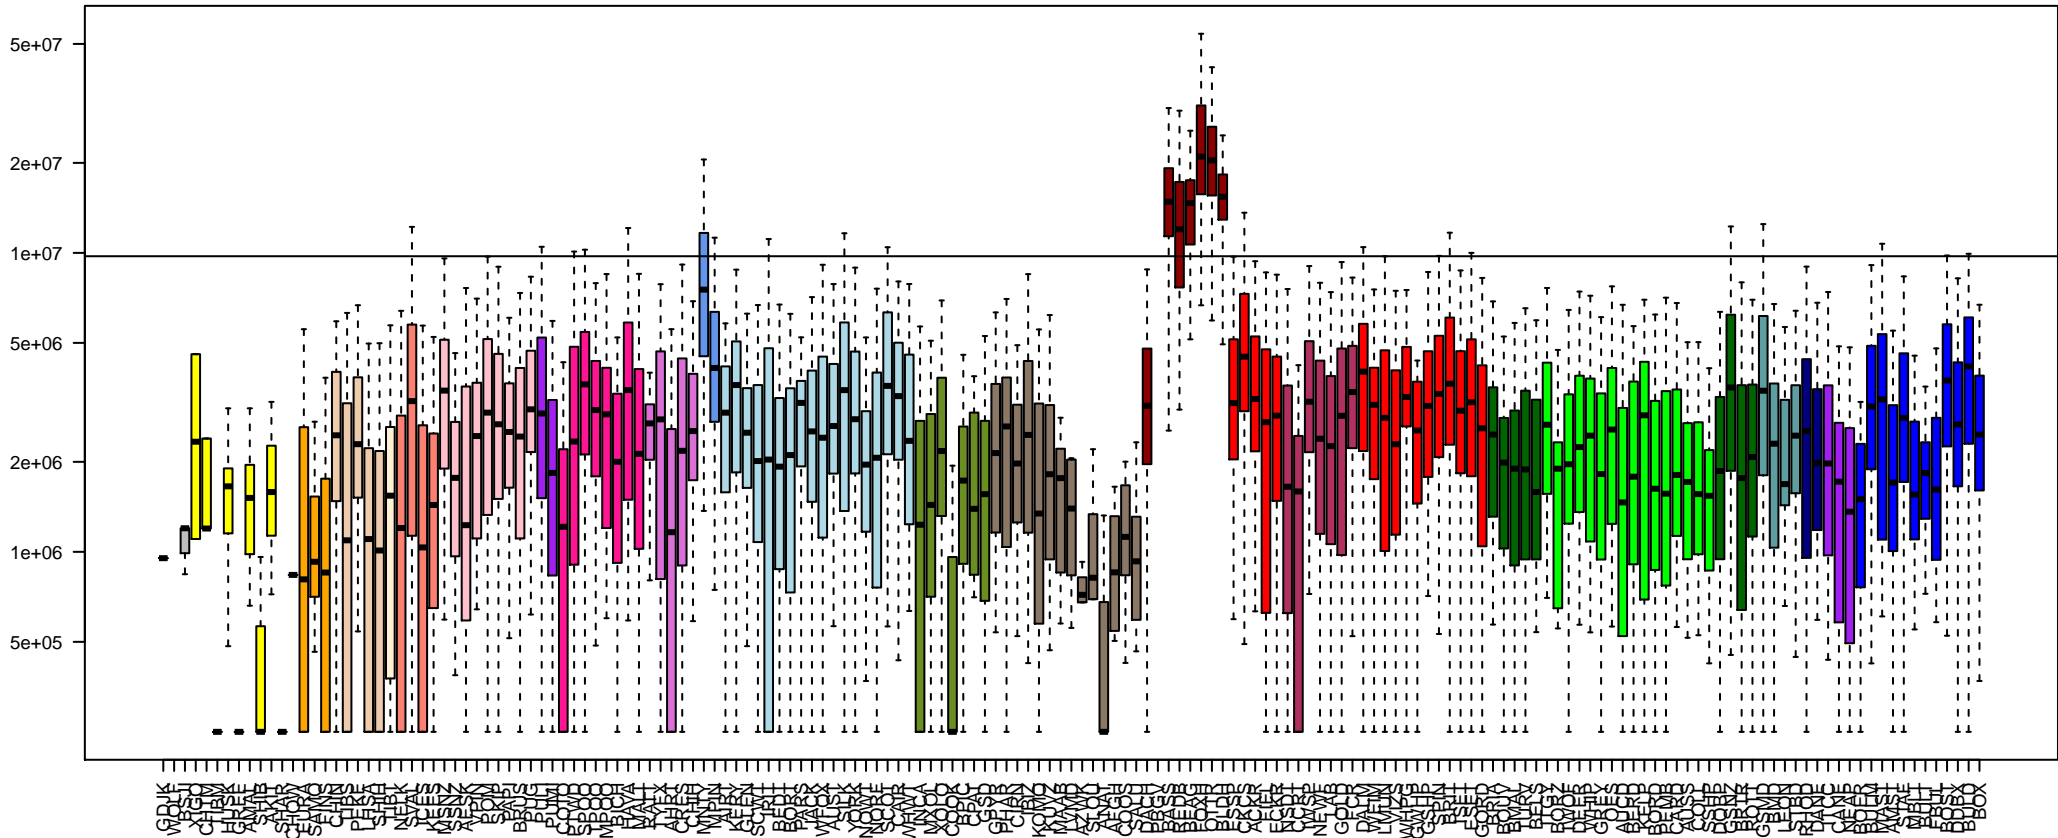

# Pharaoh Hound

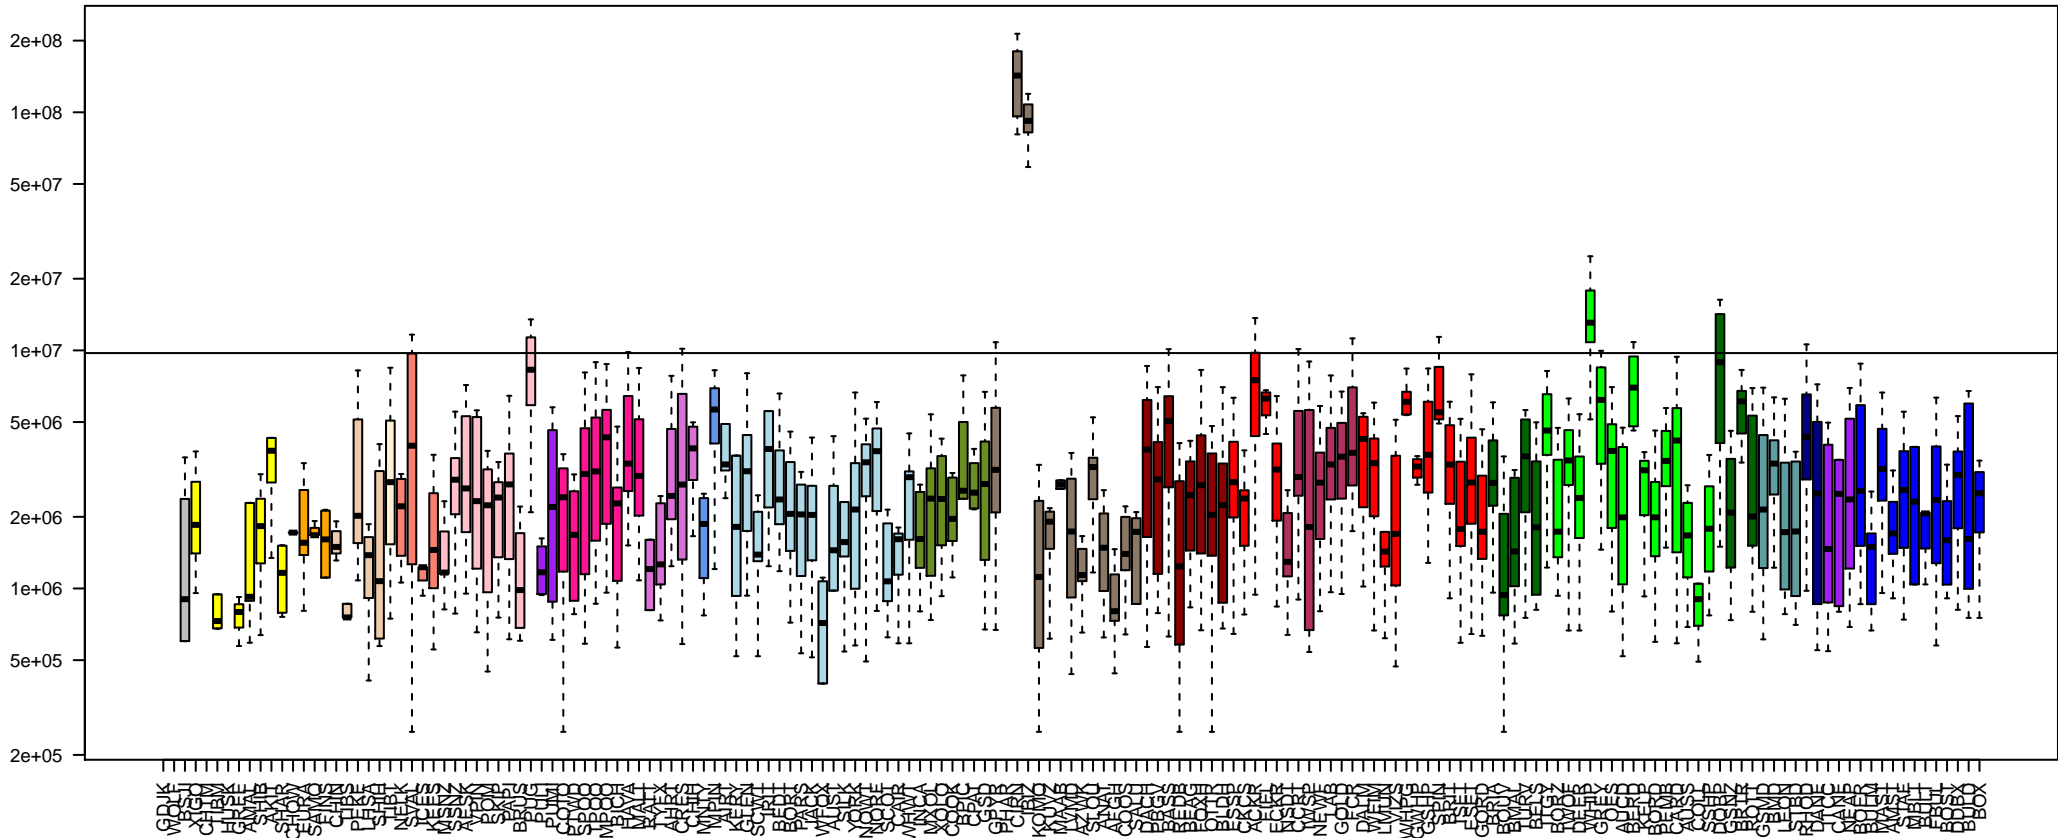

# Pomeranian

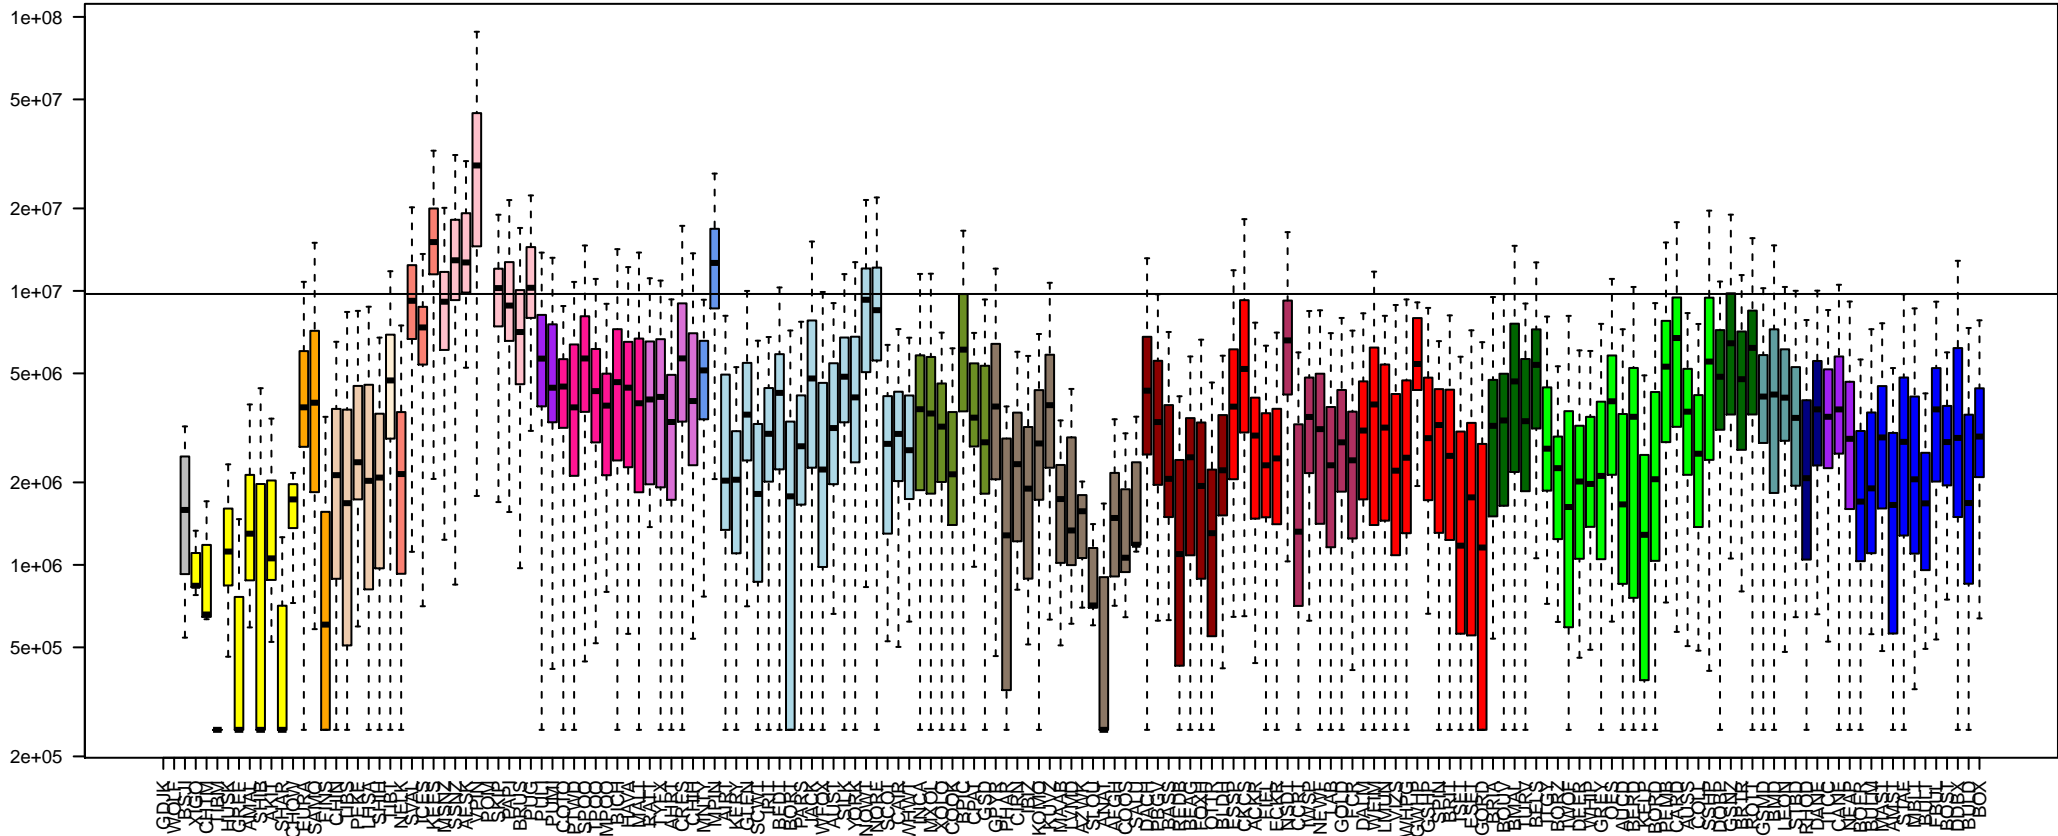

# Miniature Poodle

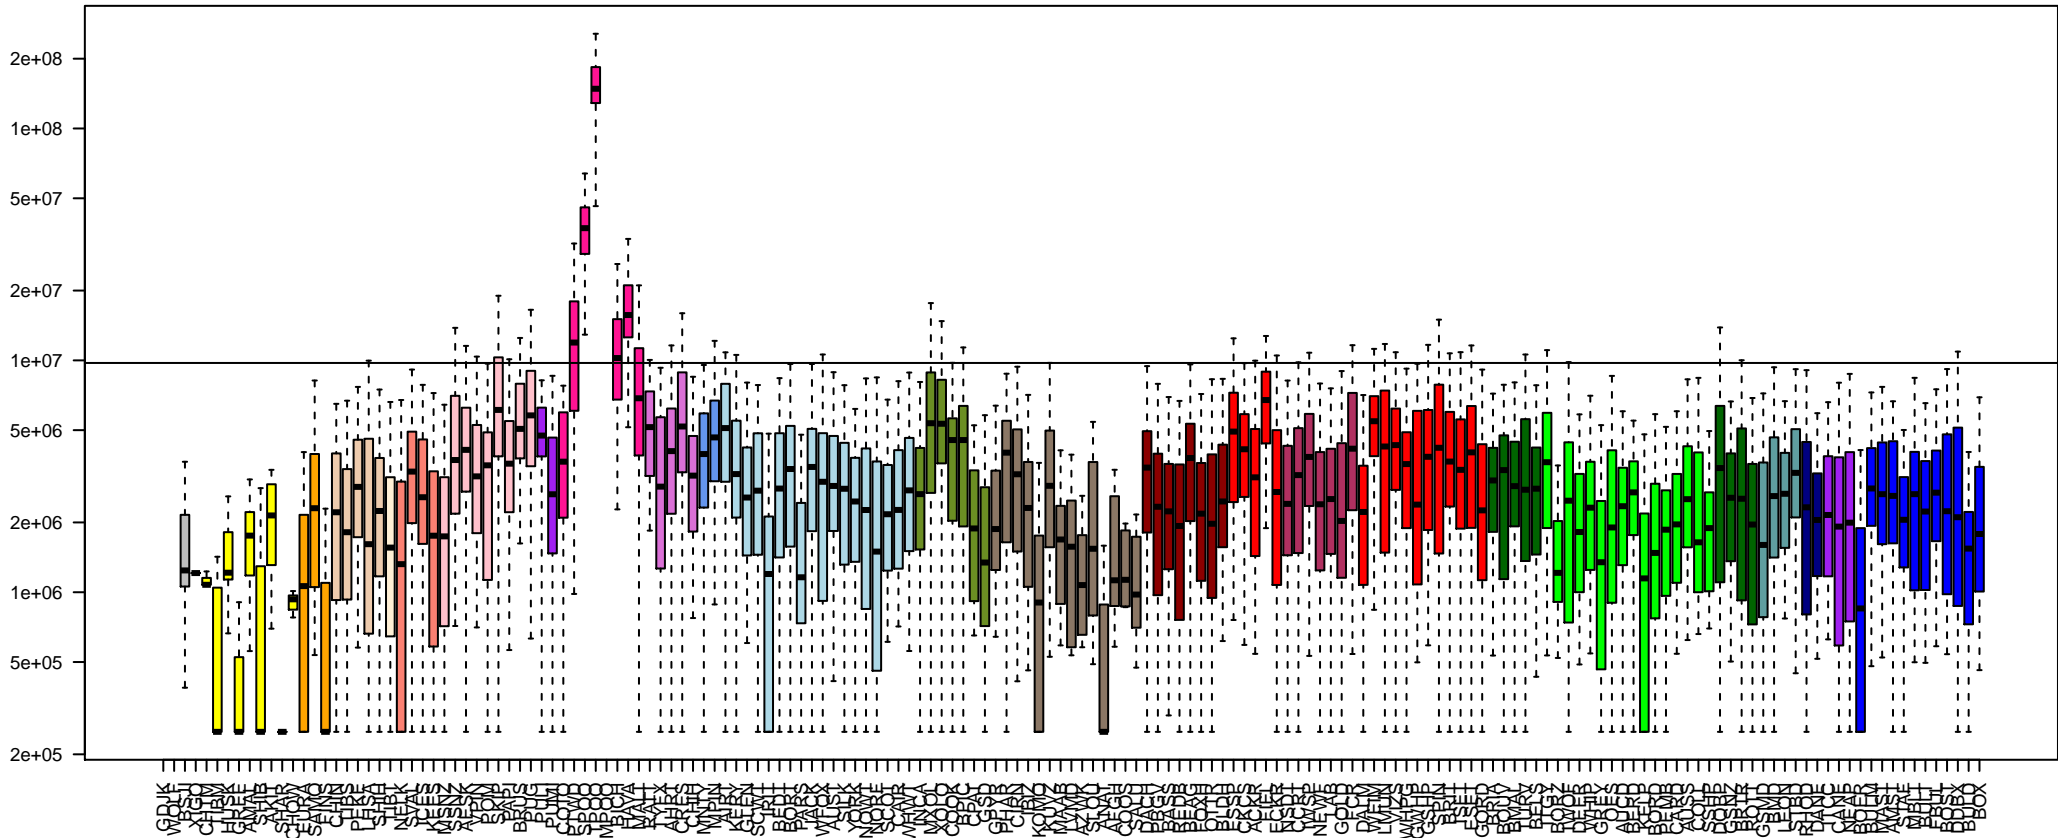

# Standard Poodle

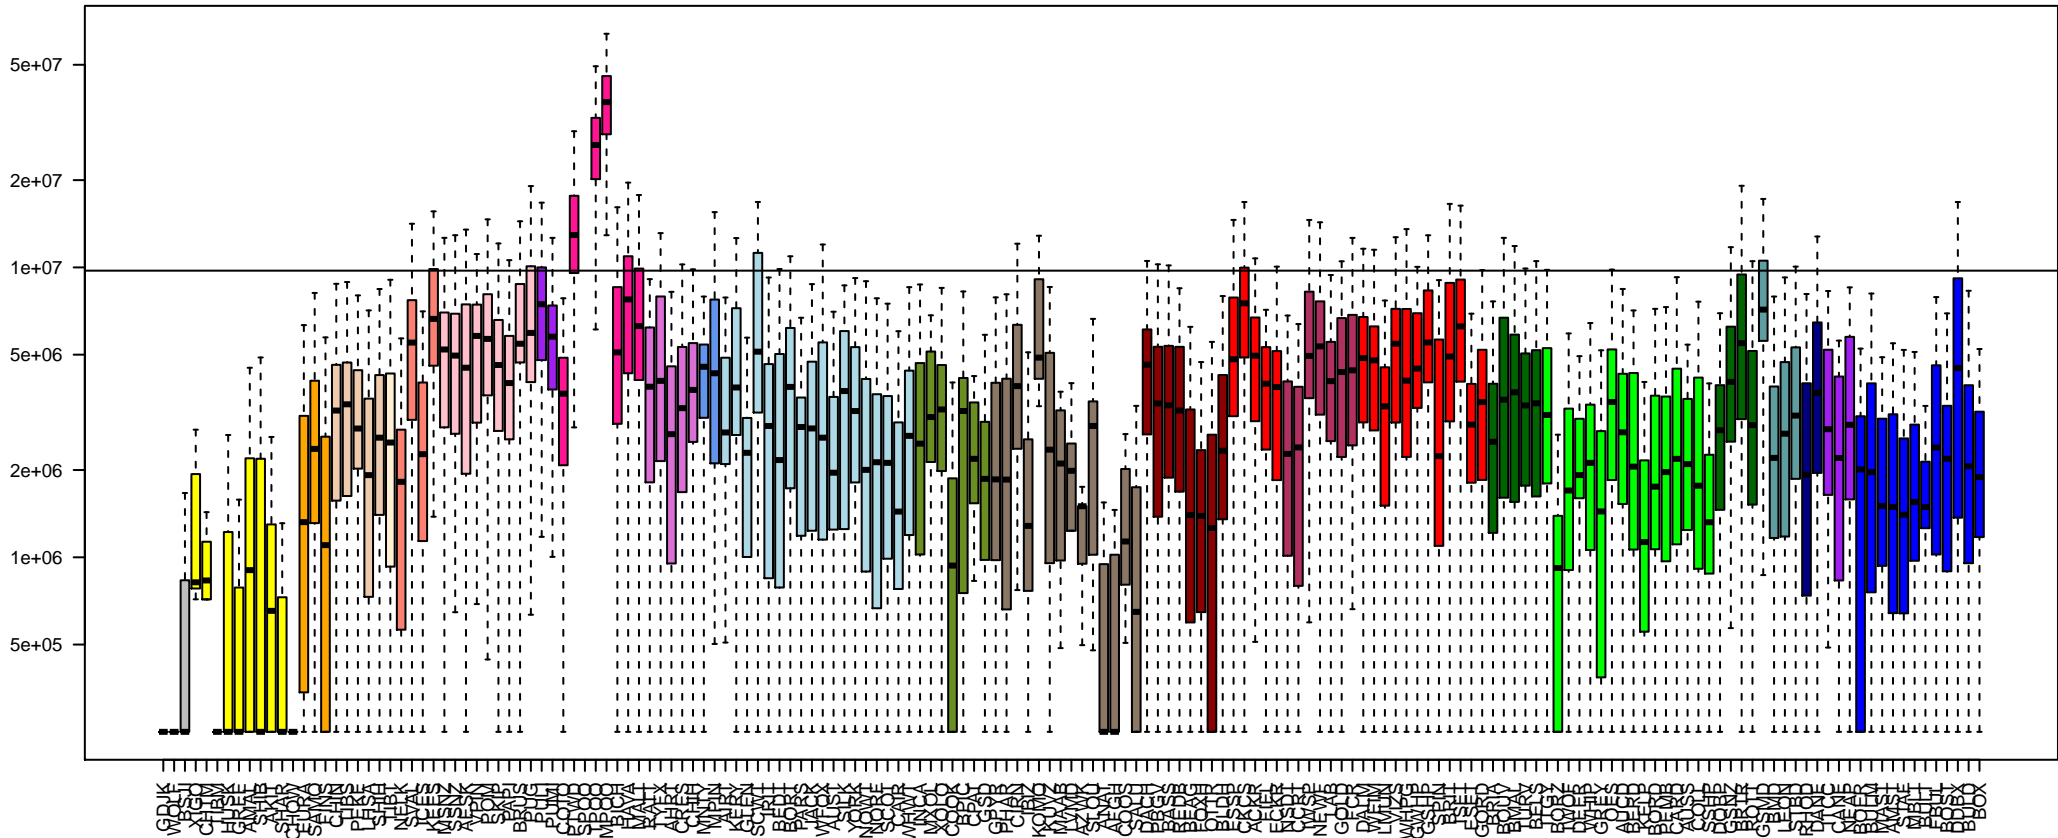

# Toy Poodle

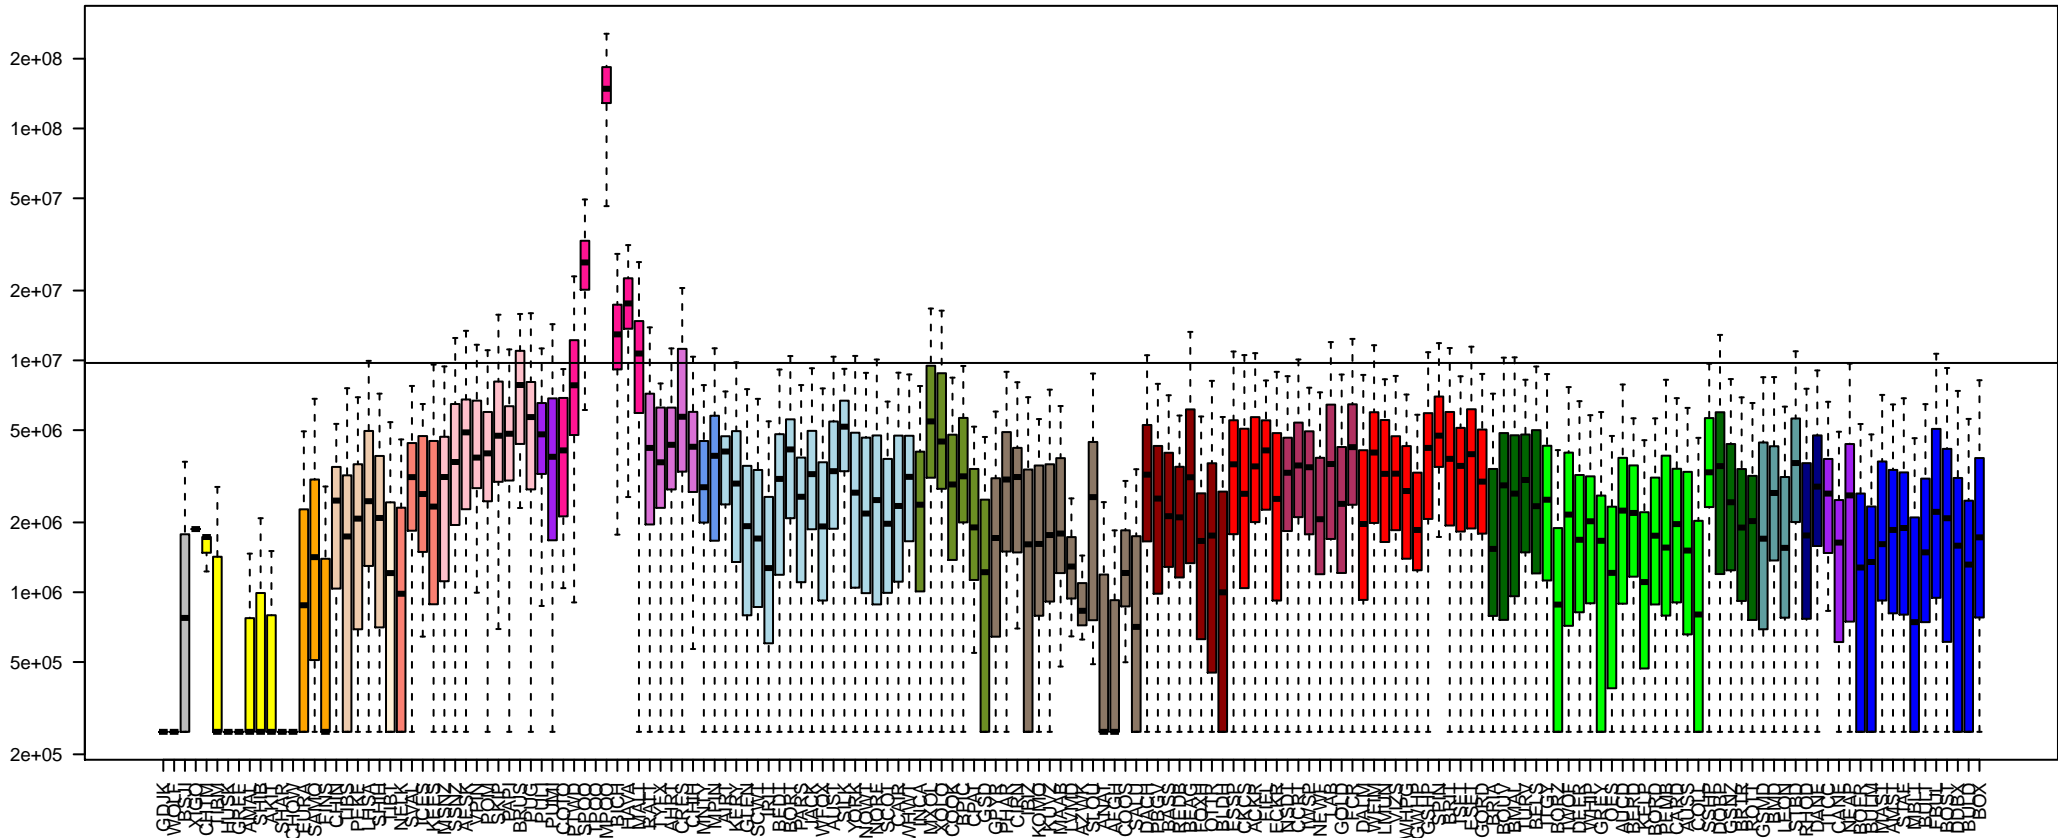





# Pug Dog

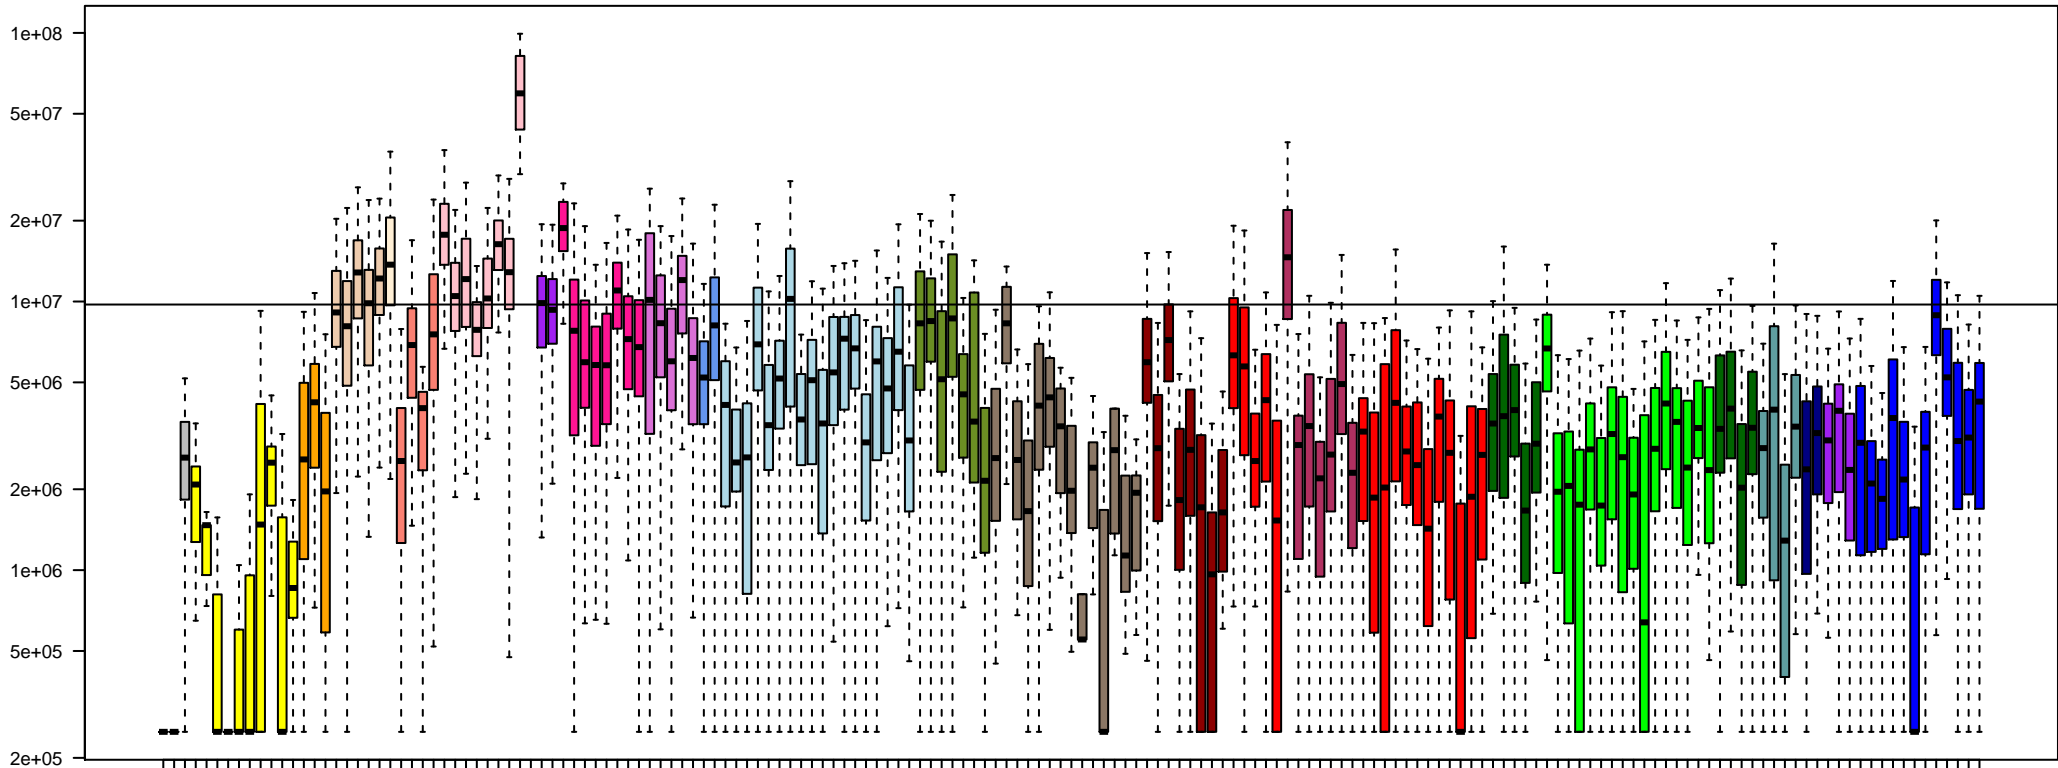

100 categories of data, each represented by a small, illegible text label on the x-axis.

# Puli

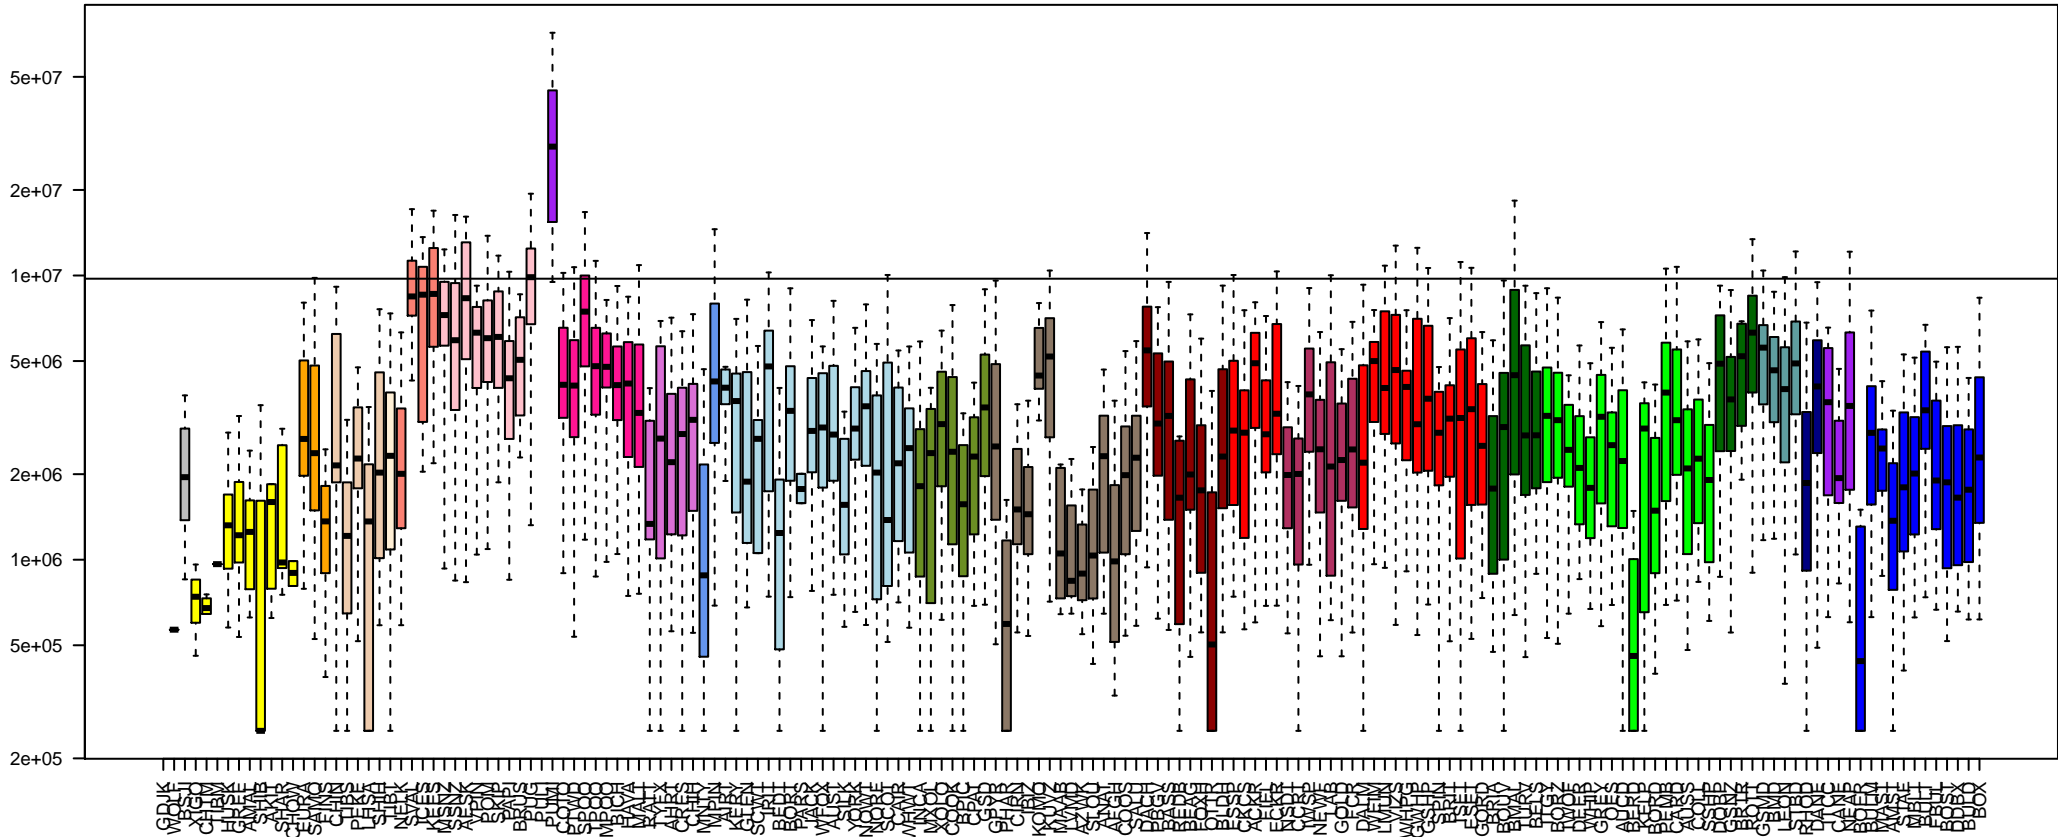

# Pumi

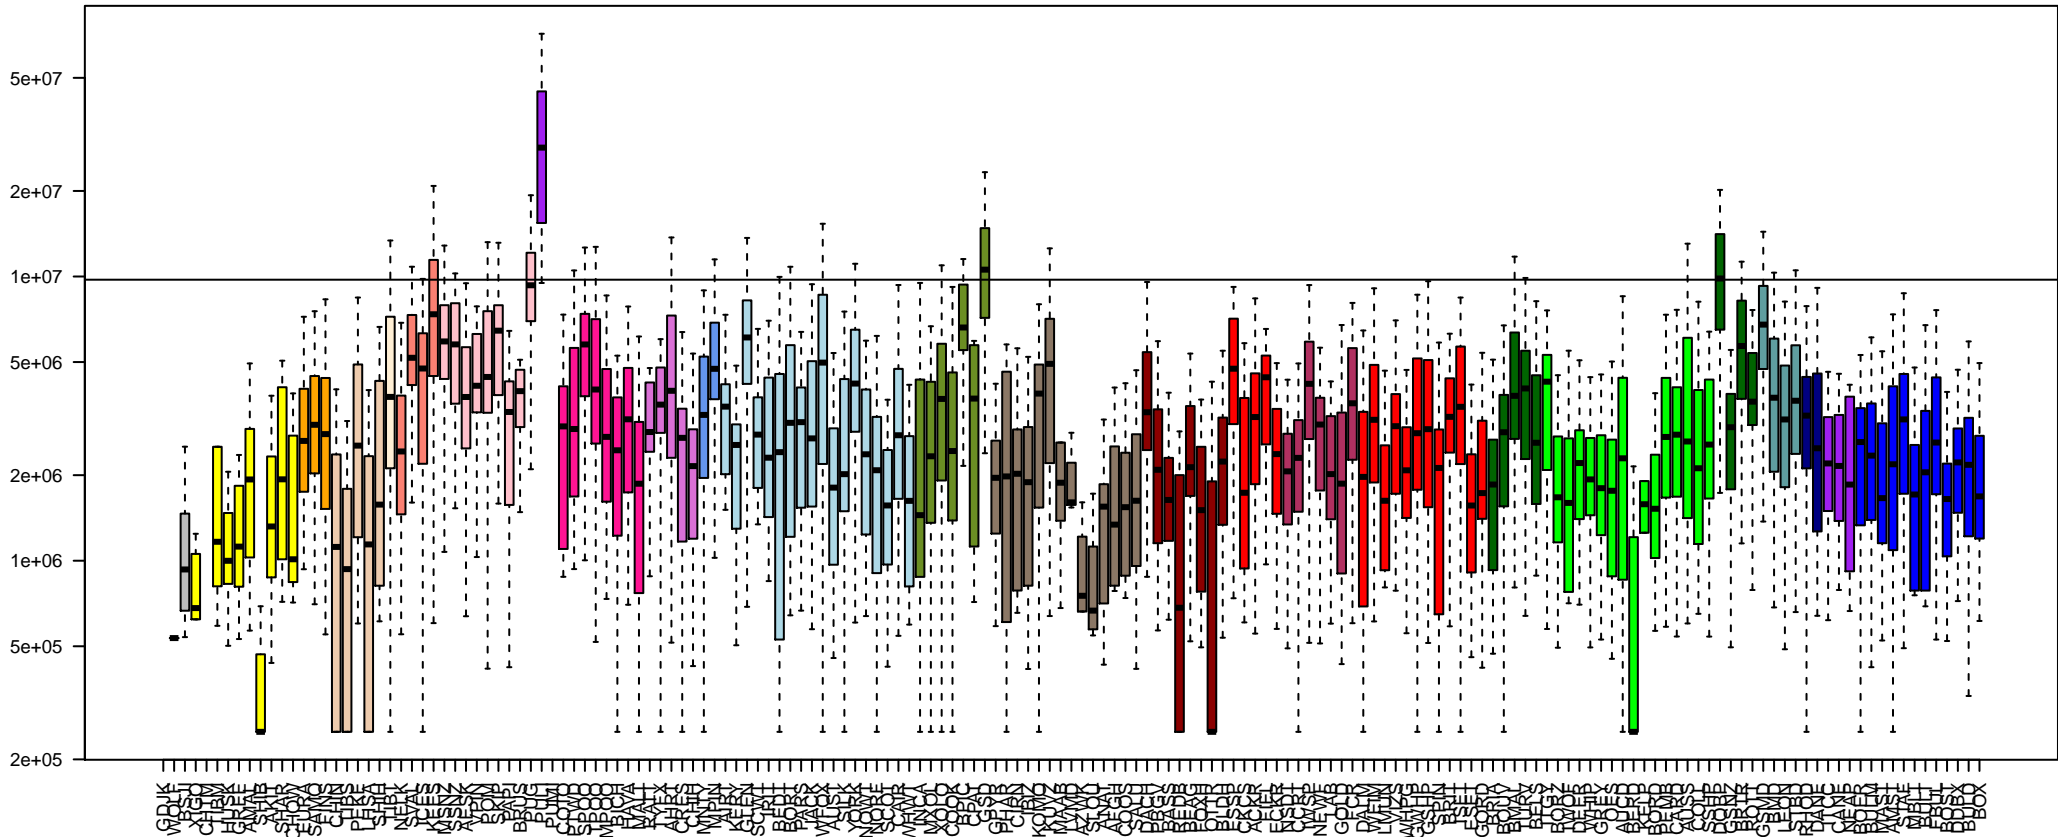

# Rat Terrier

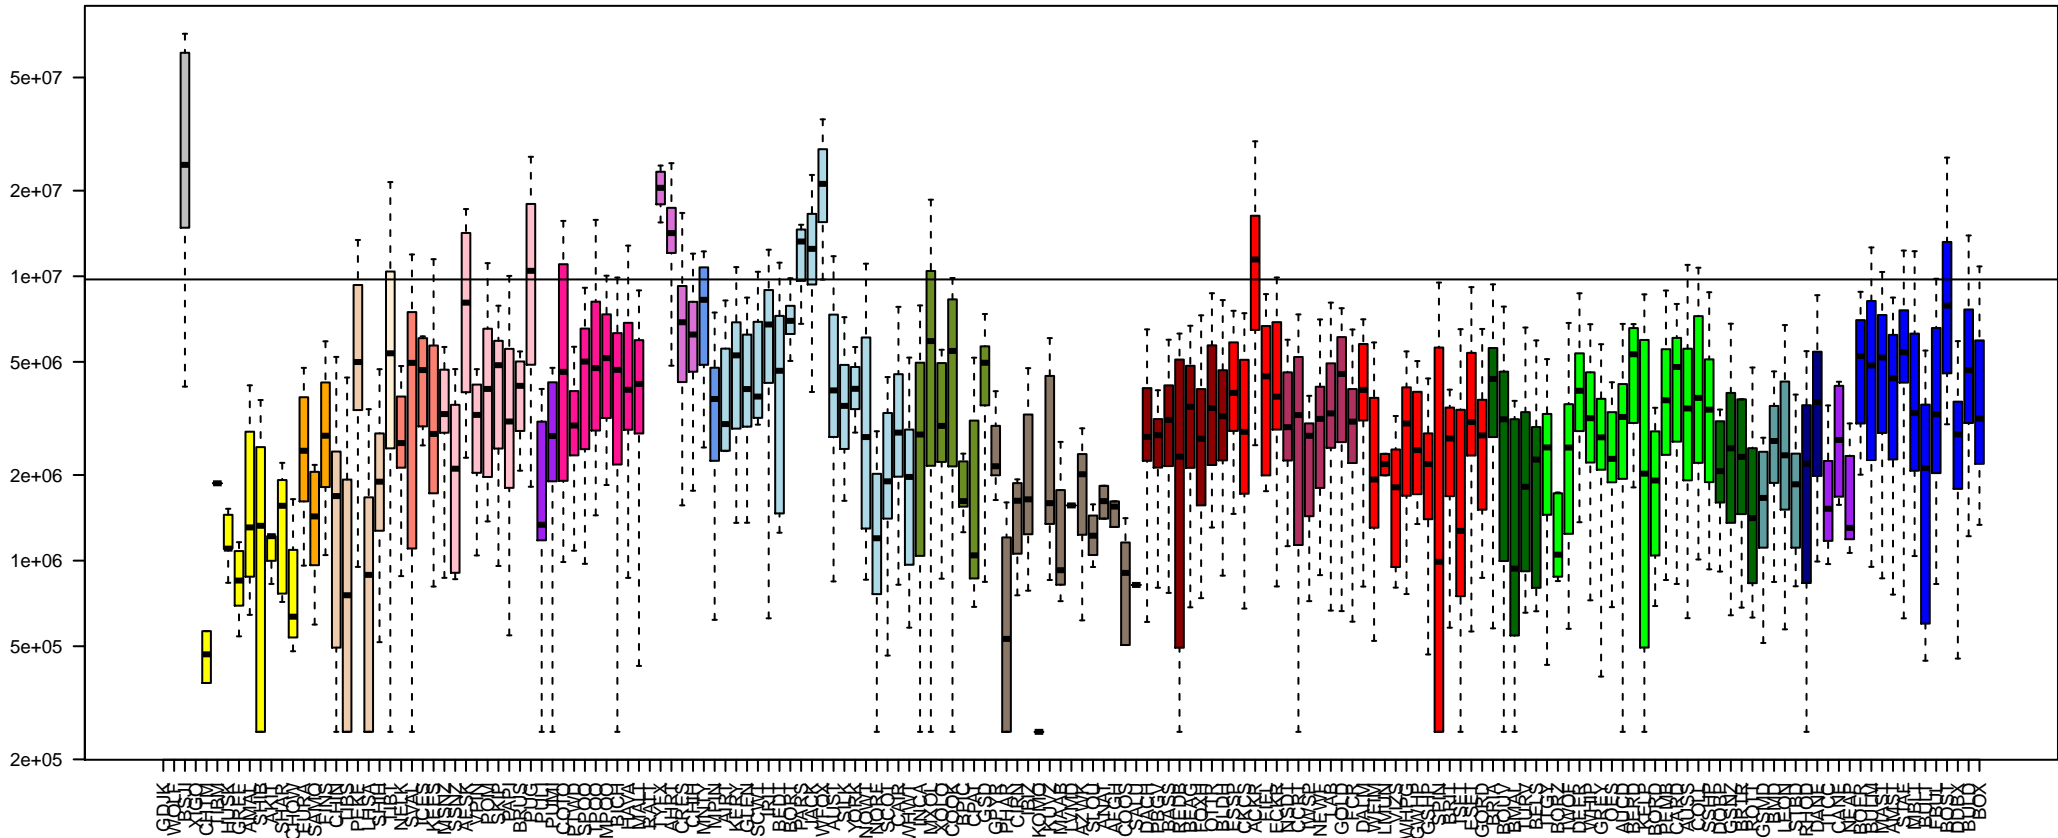

# Redbone Coonhound

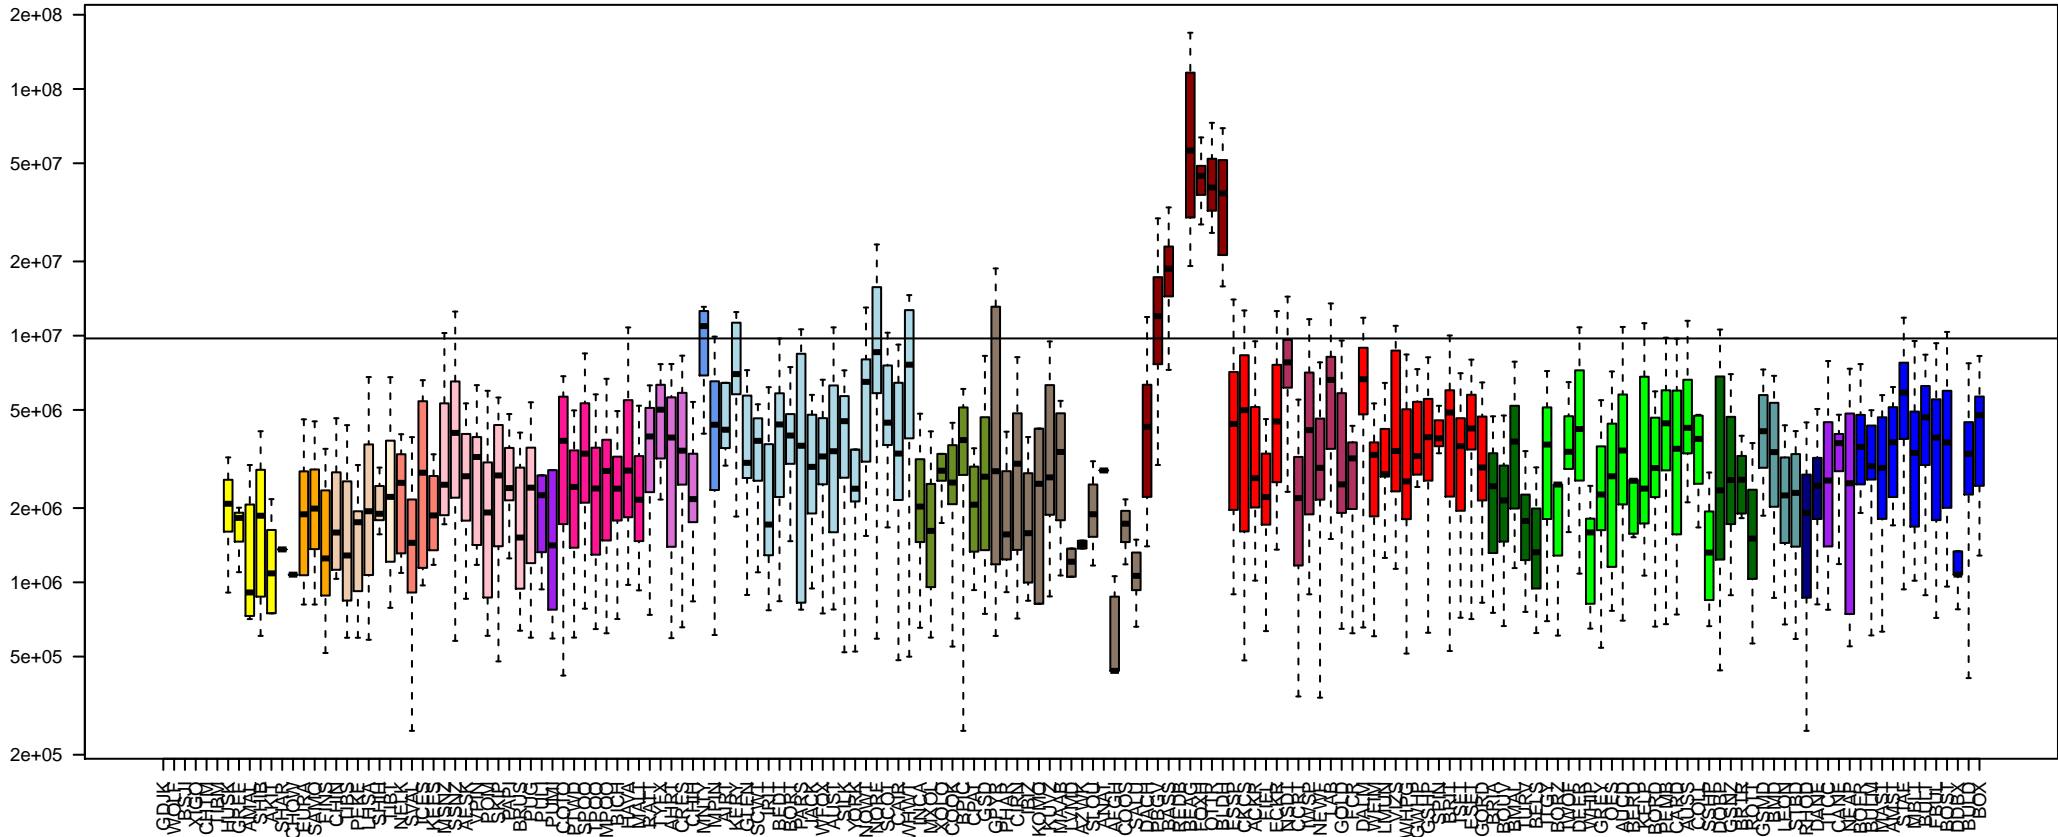



# Rottweiler

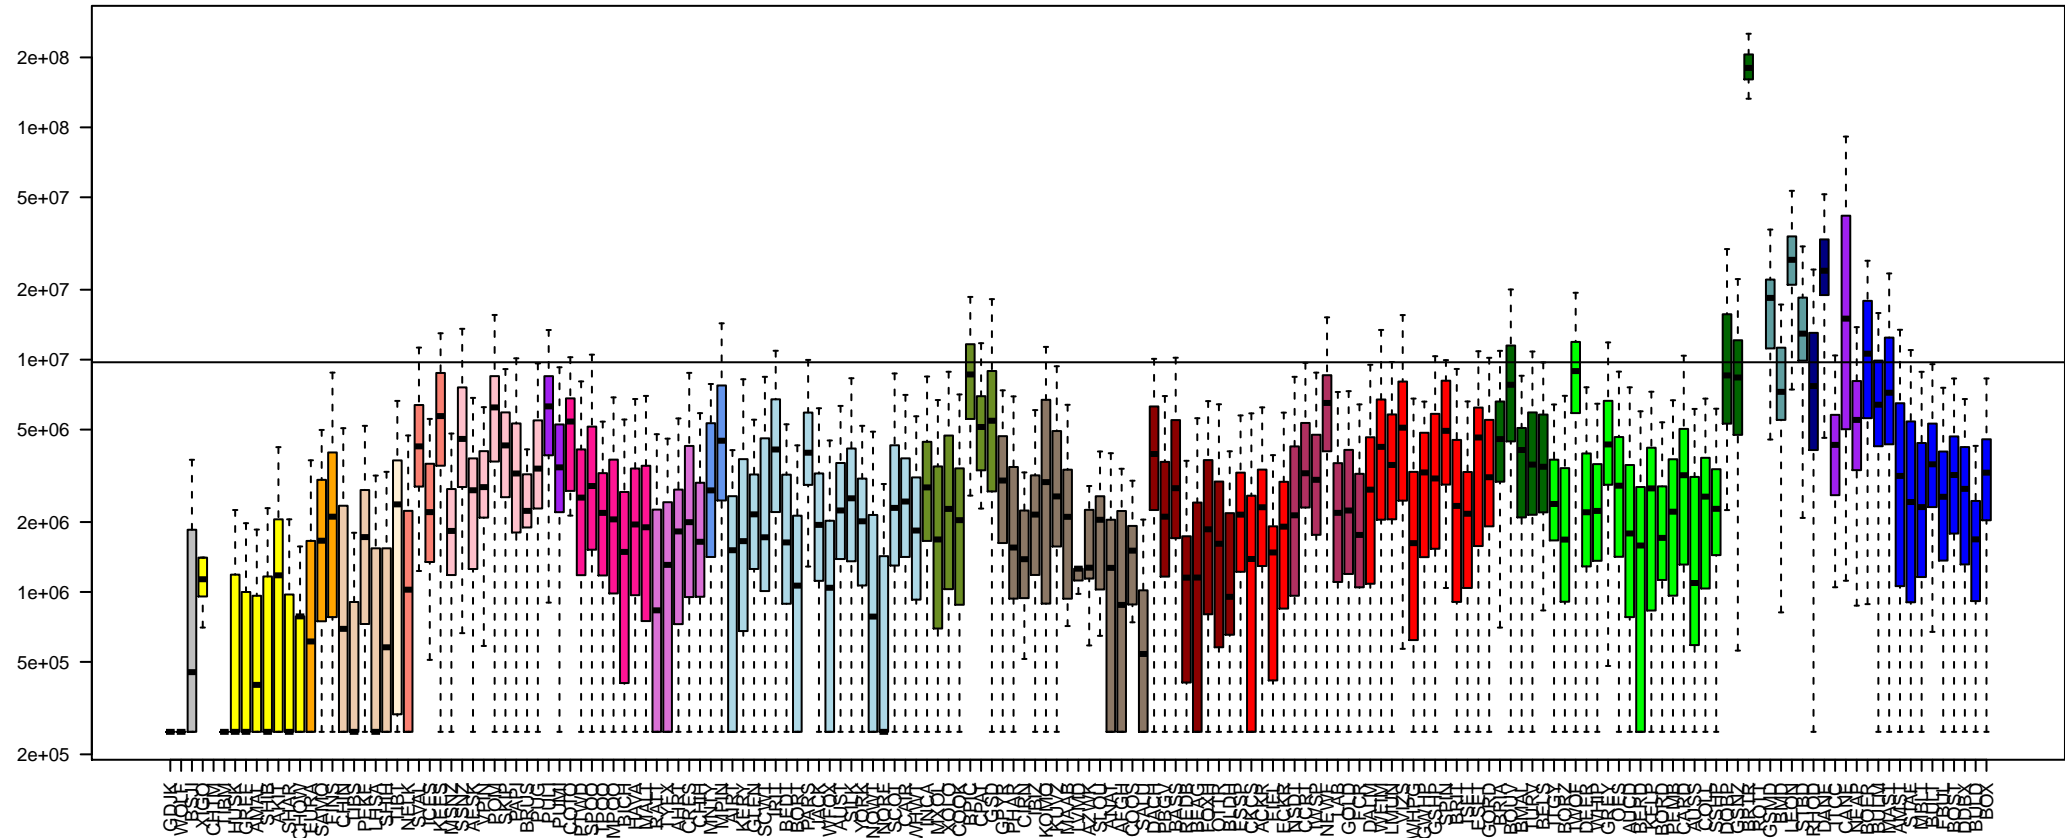



# Saint Bernard

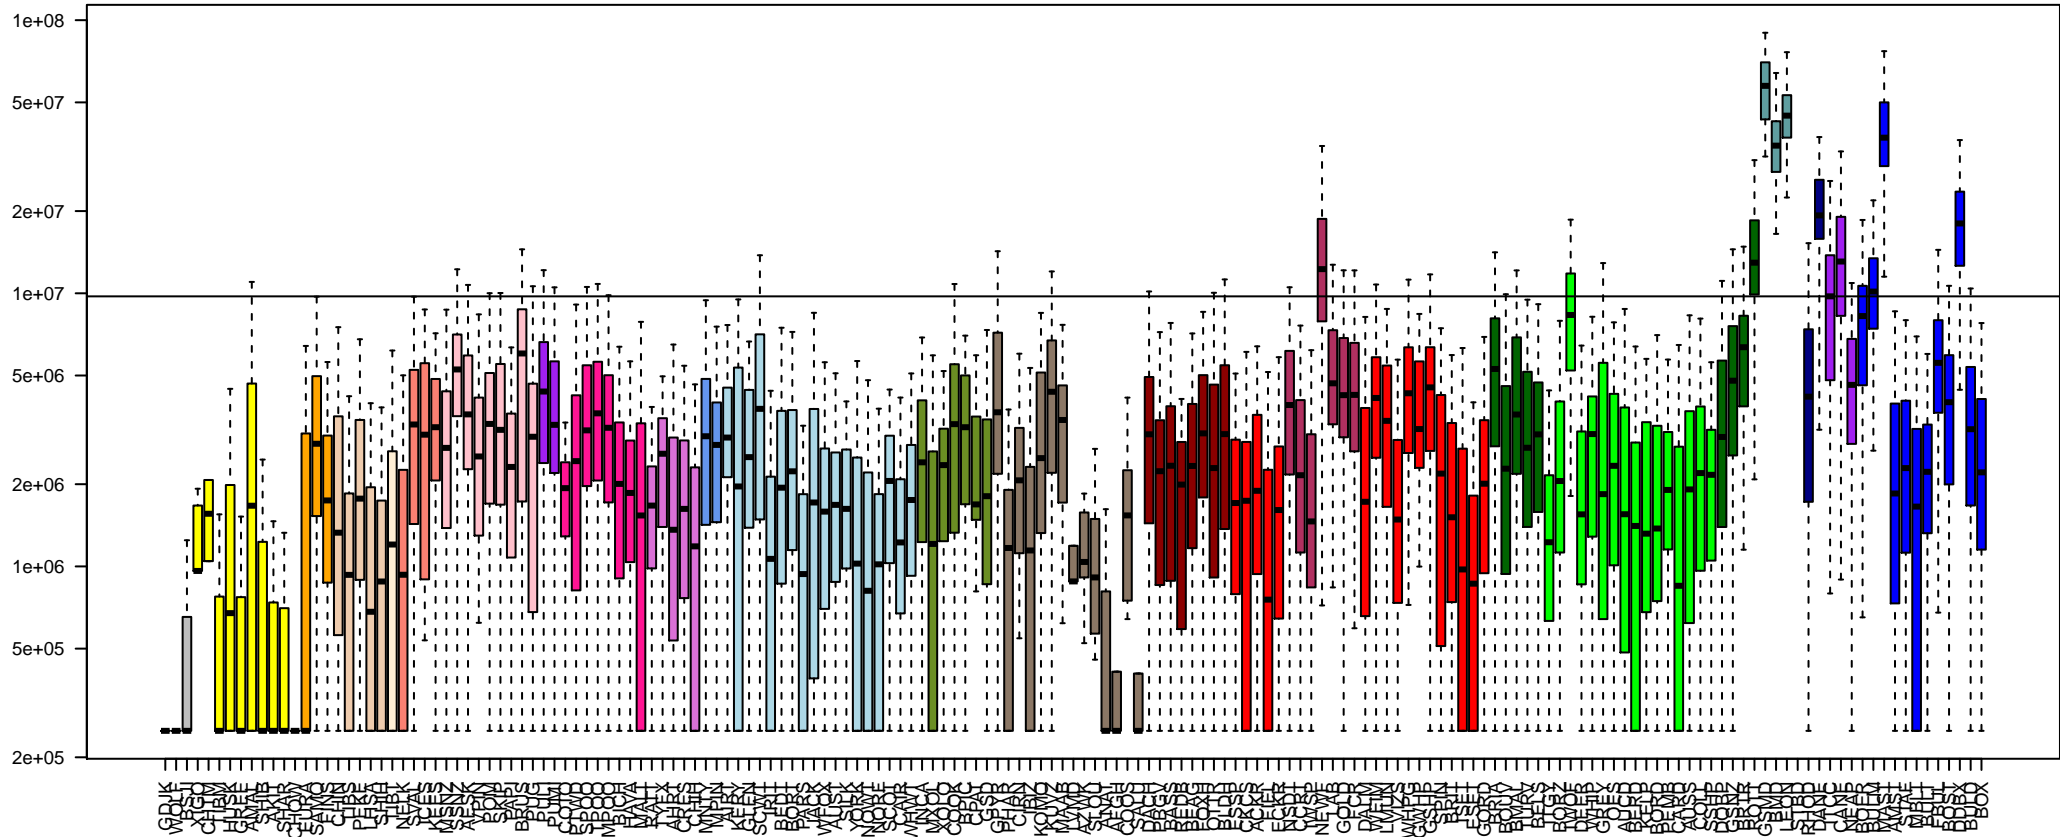



# Saluki - North American

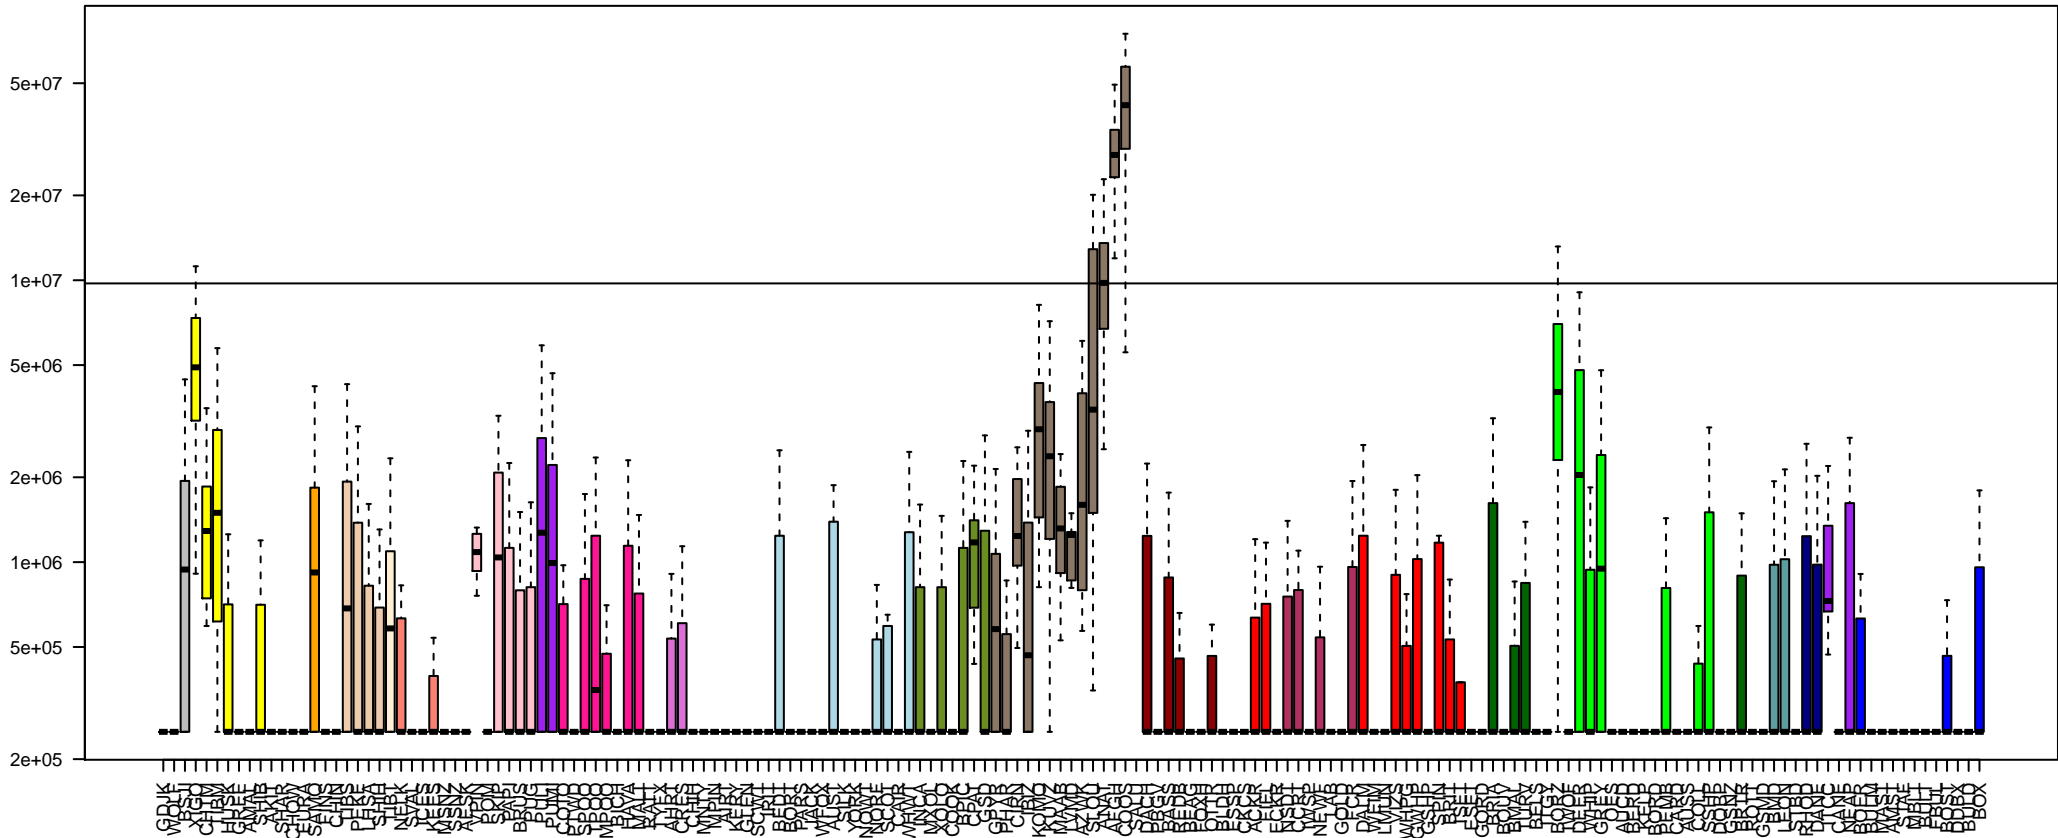

# Samoyed

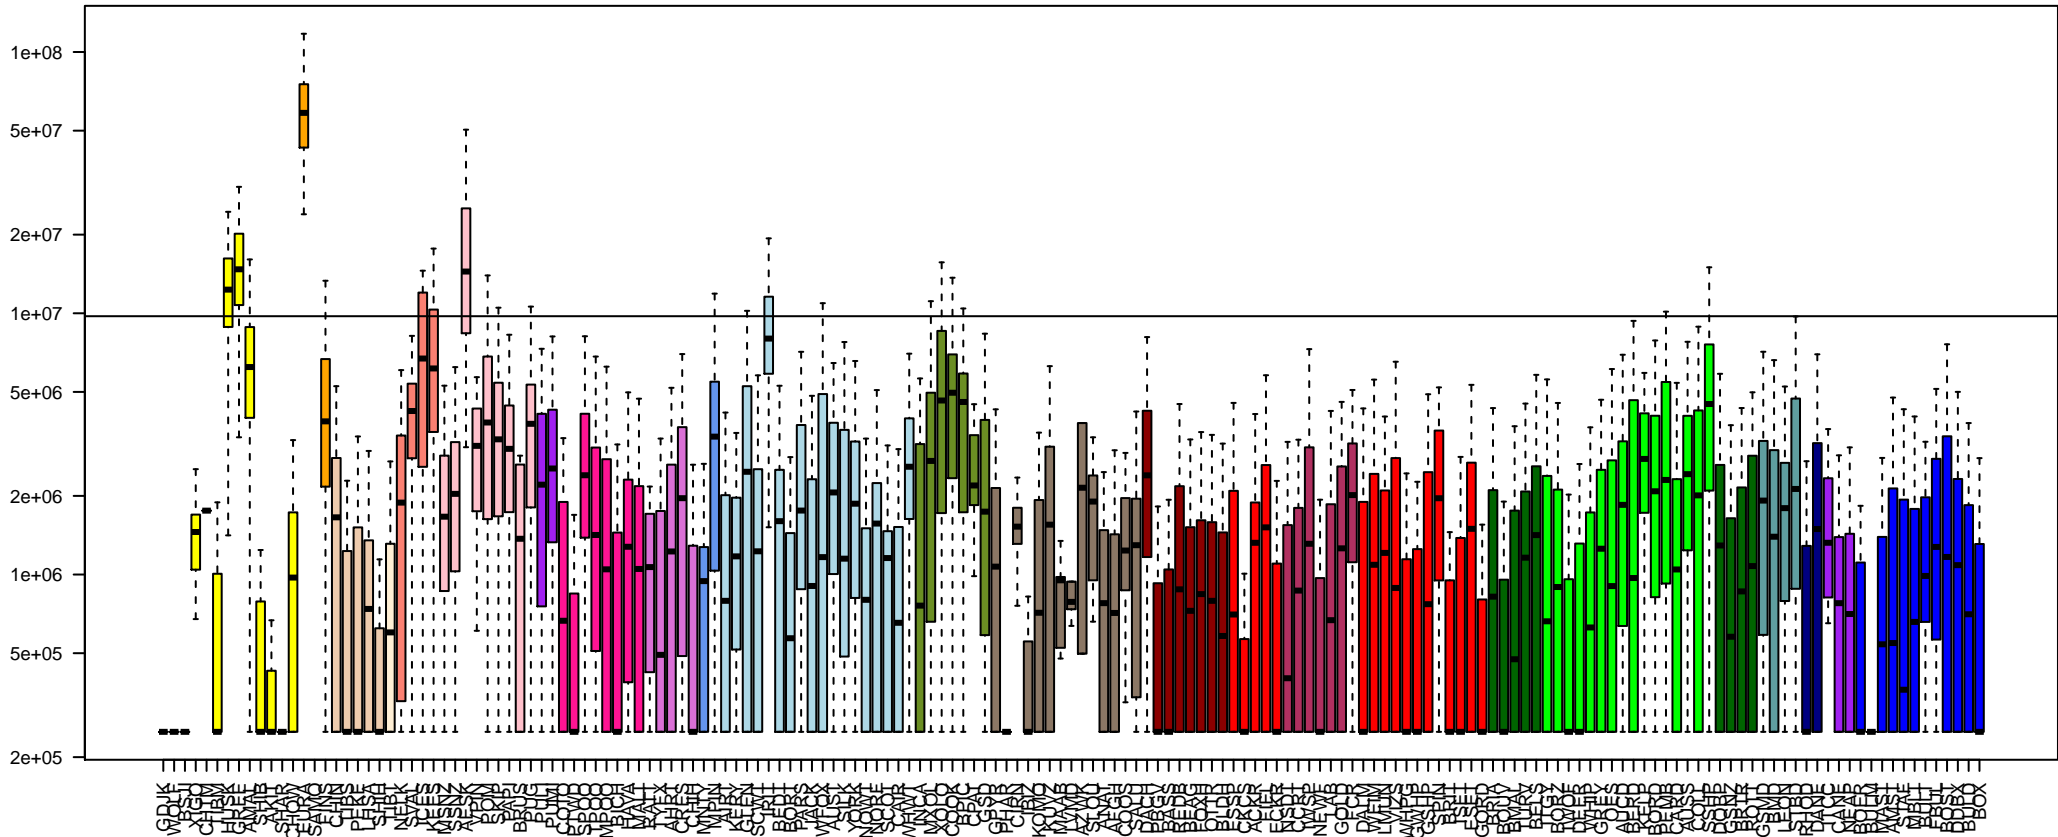



# Scottish Deerhound

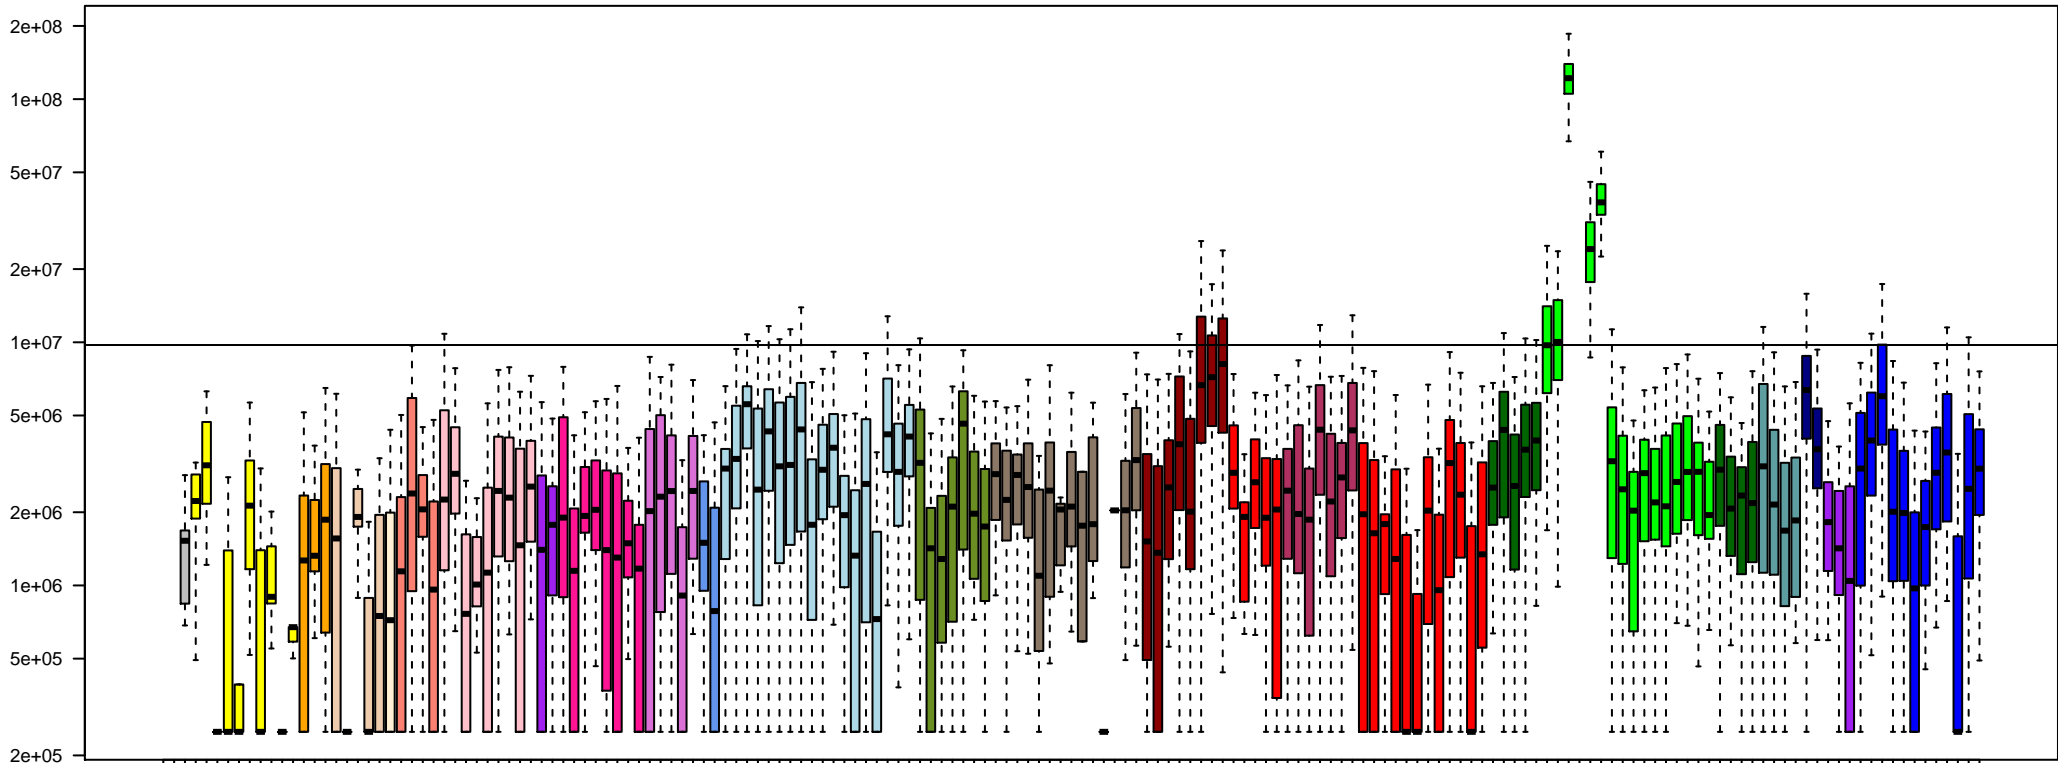

Small, rotated text labels along the x-axis, likely representing individual categories or samples.

# Scottish Terrier

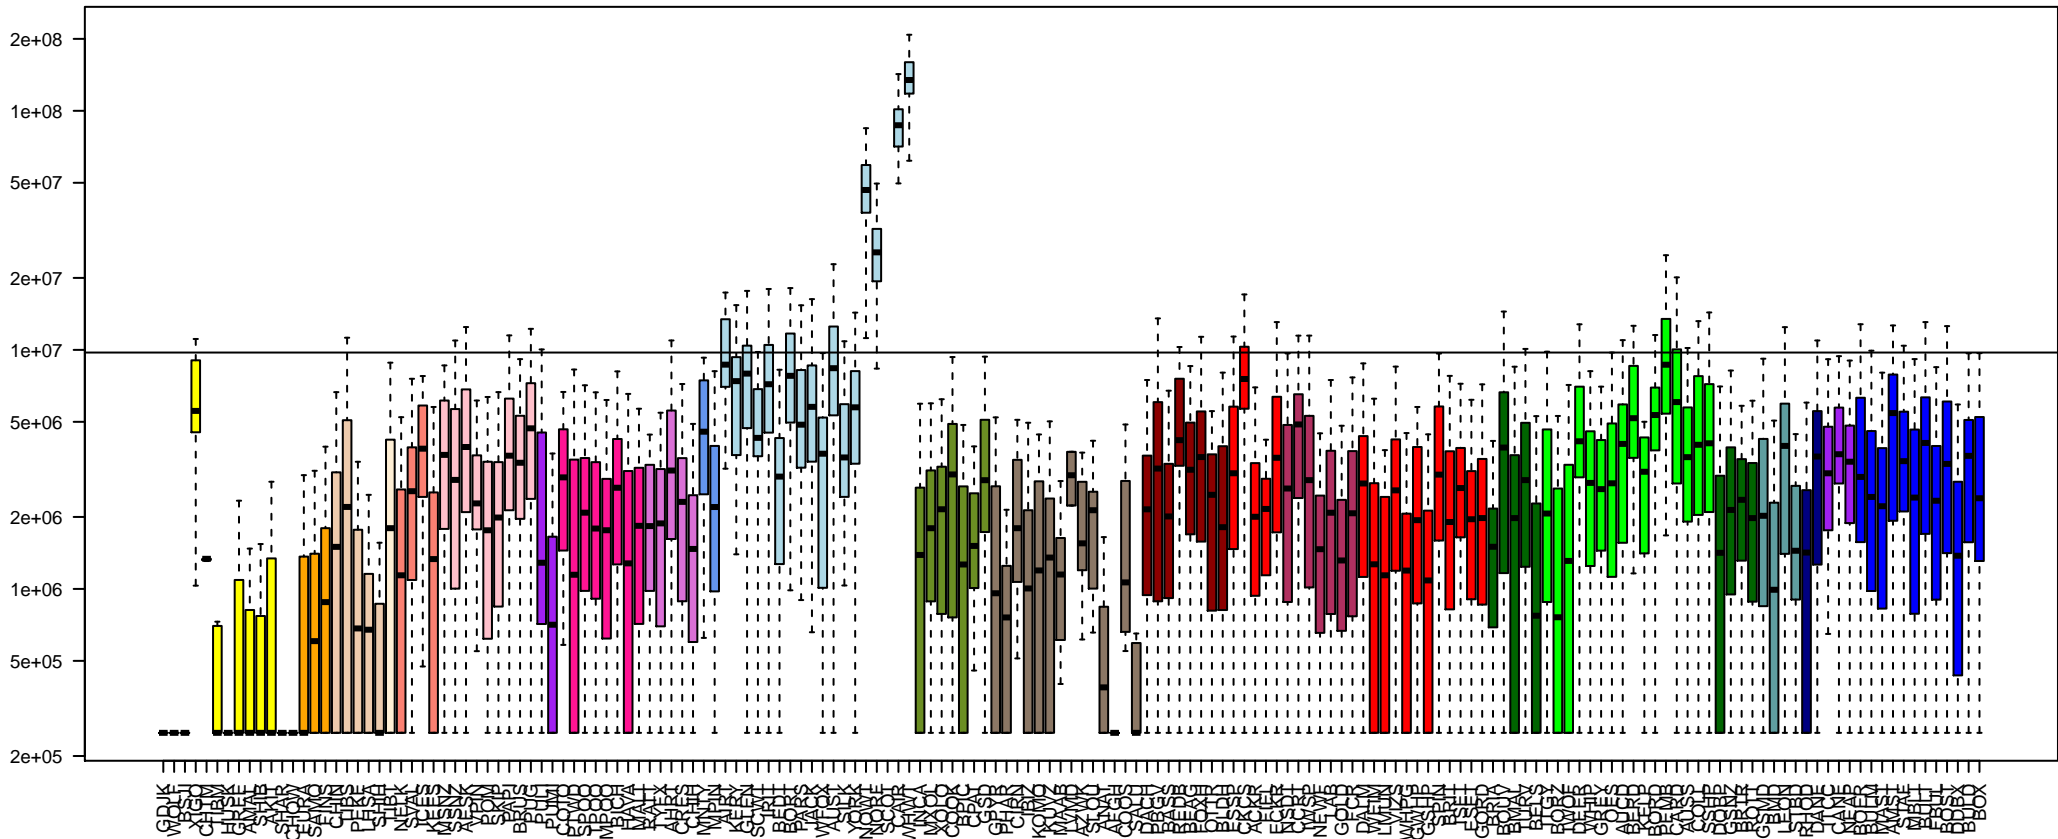

# Shetland Sheepdog

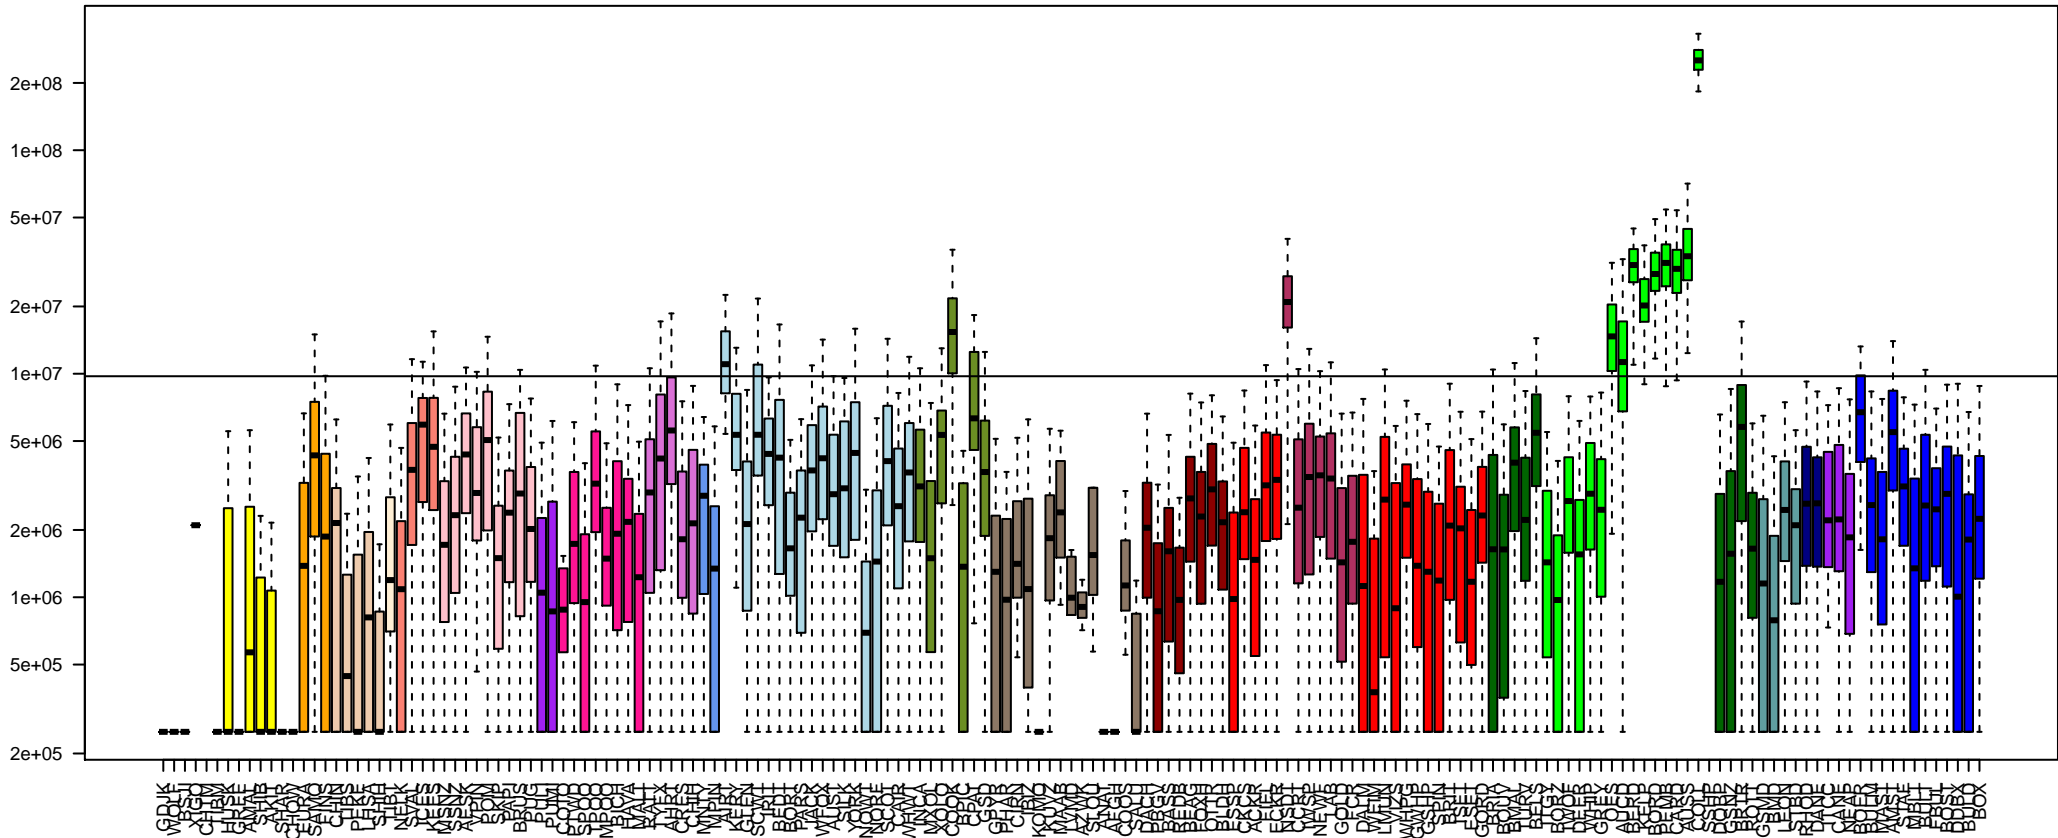



# Shiba Inu

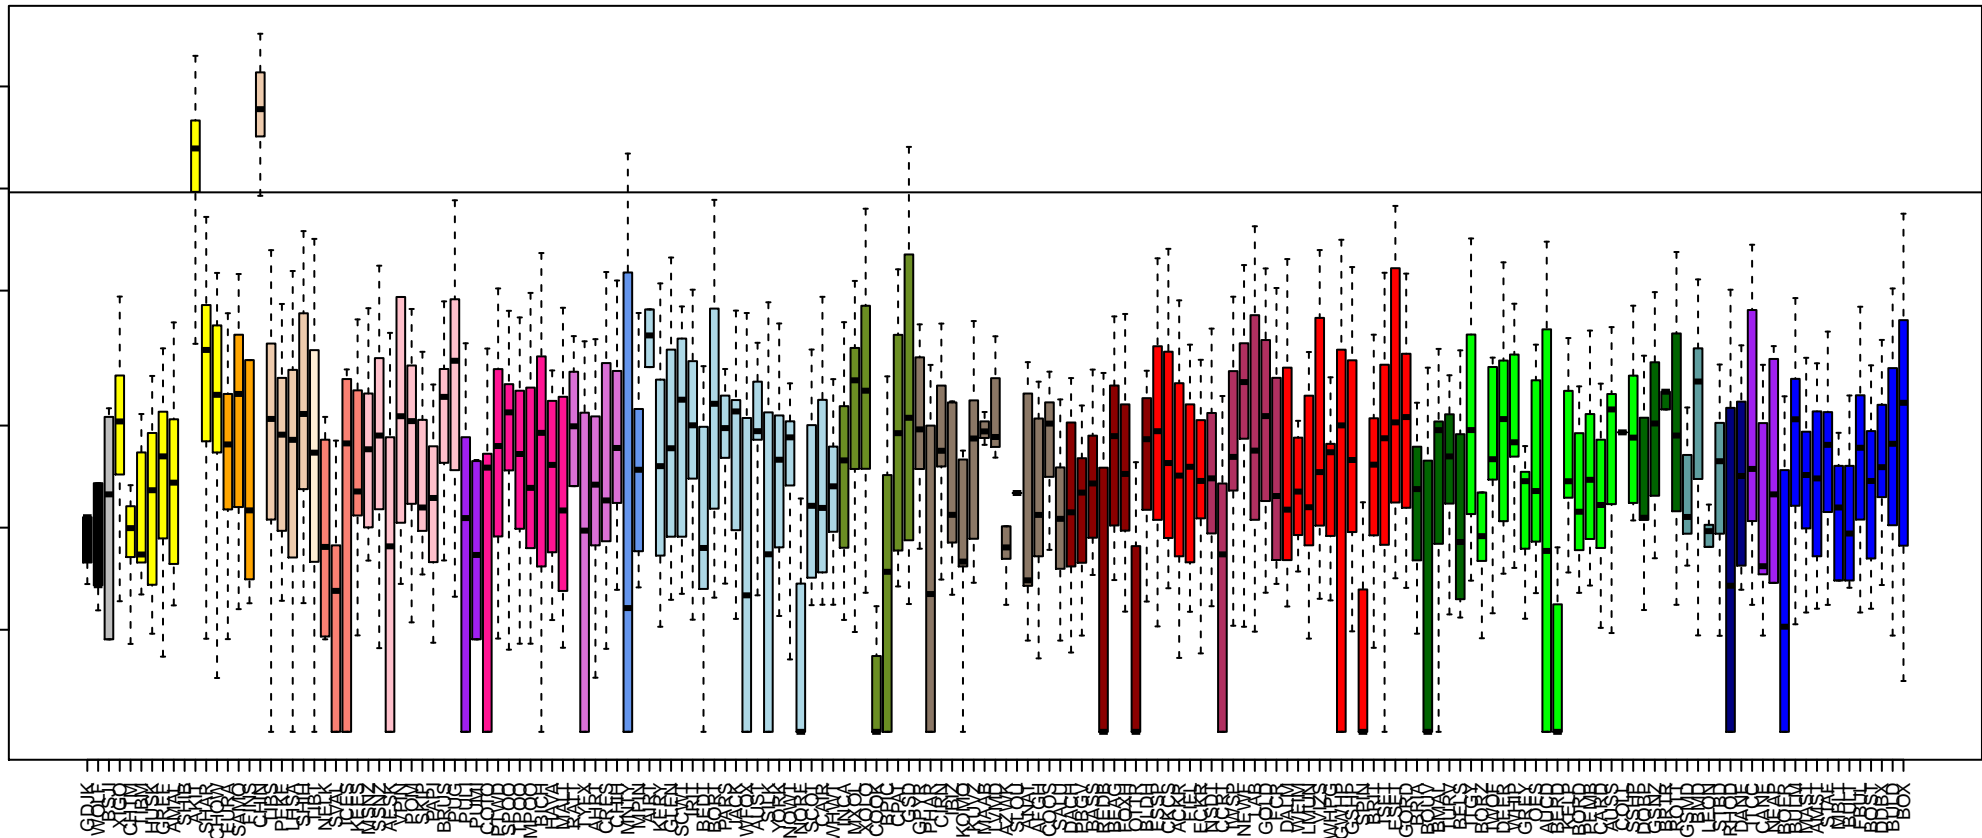

# Shih Tzu

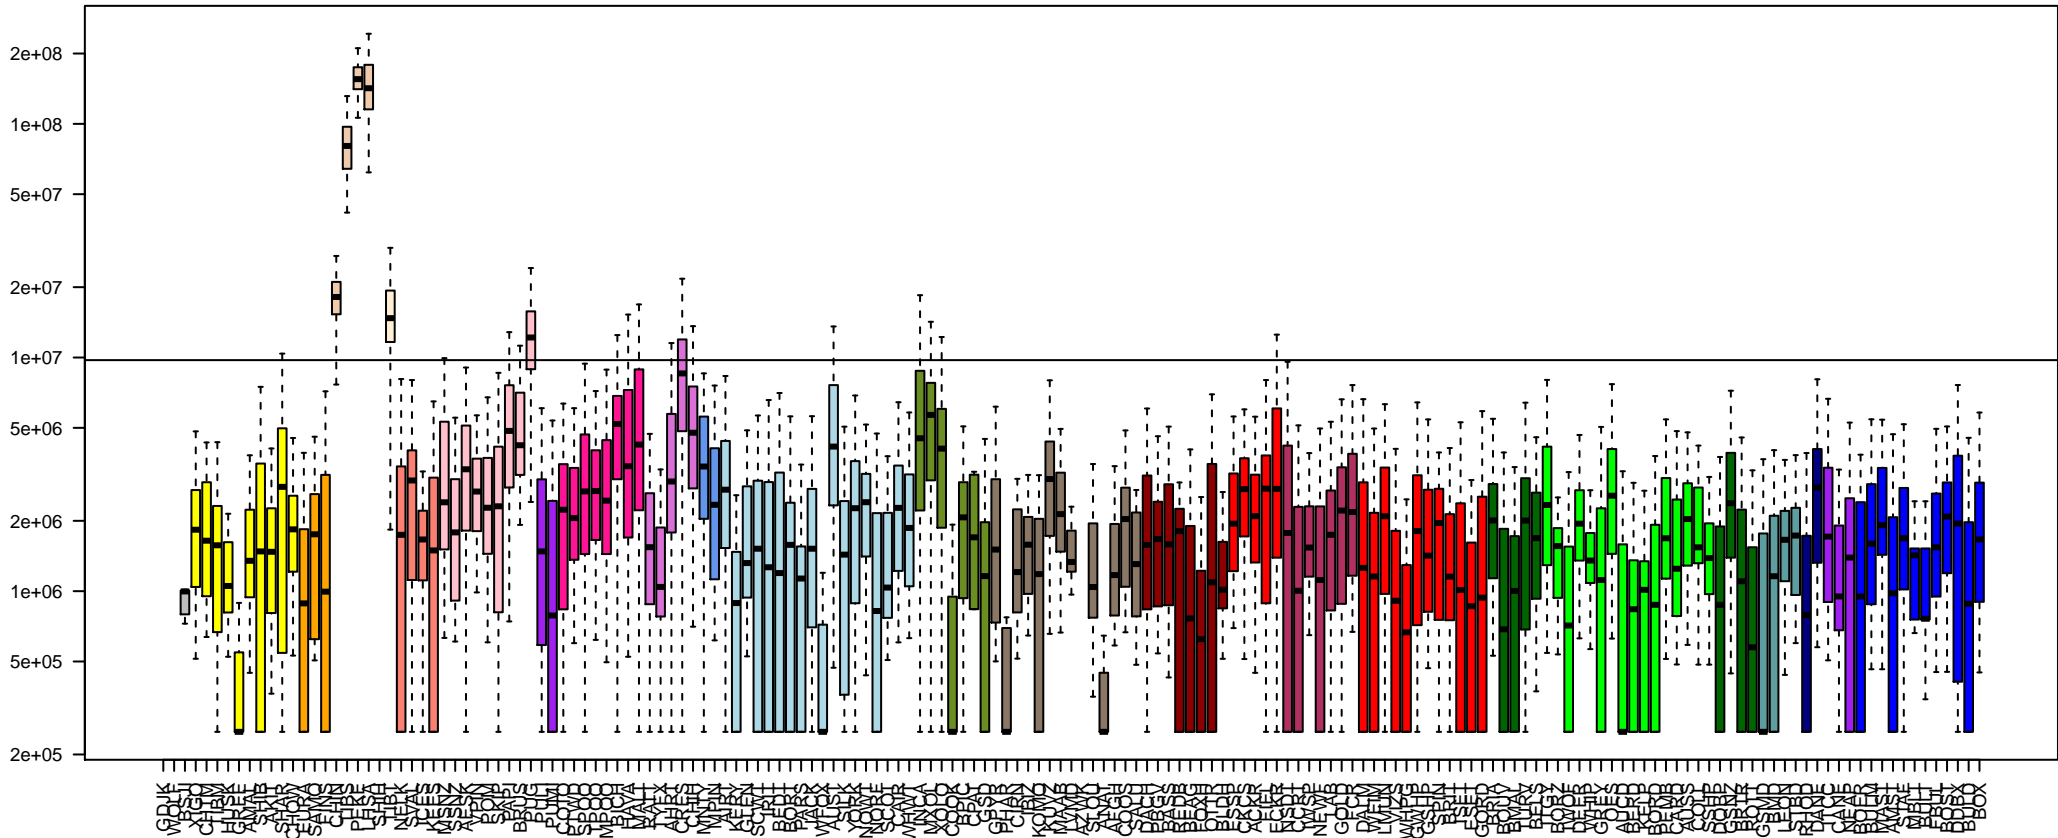



# Silky Terrier

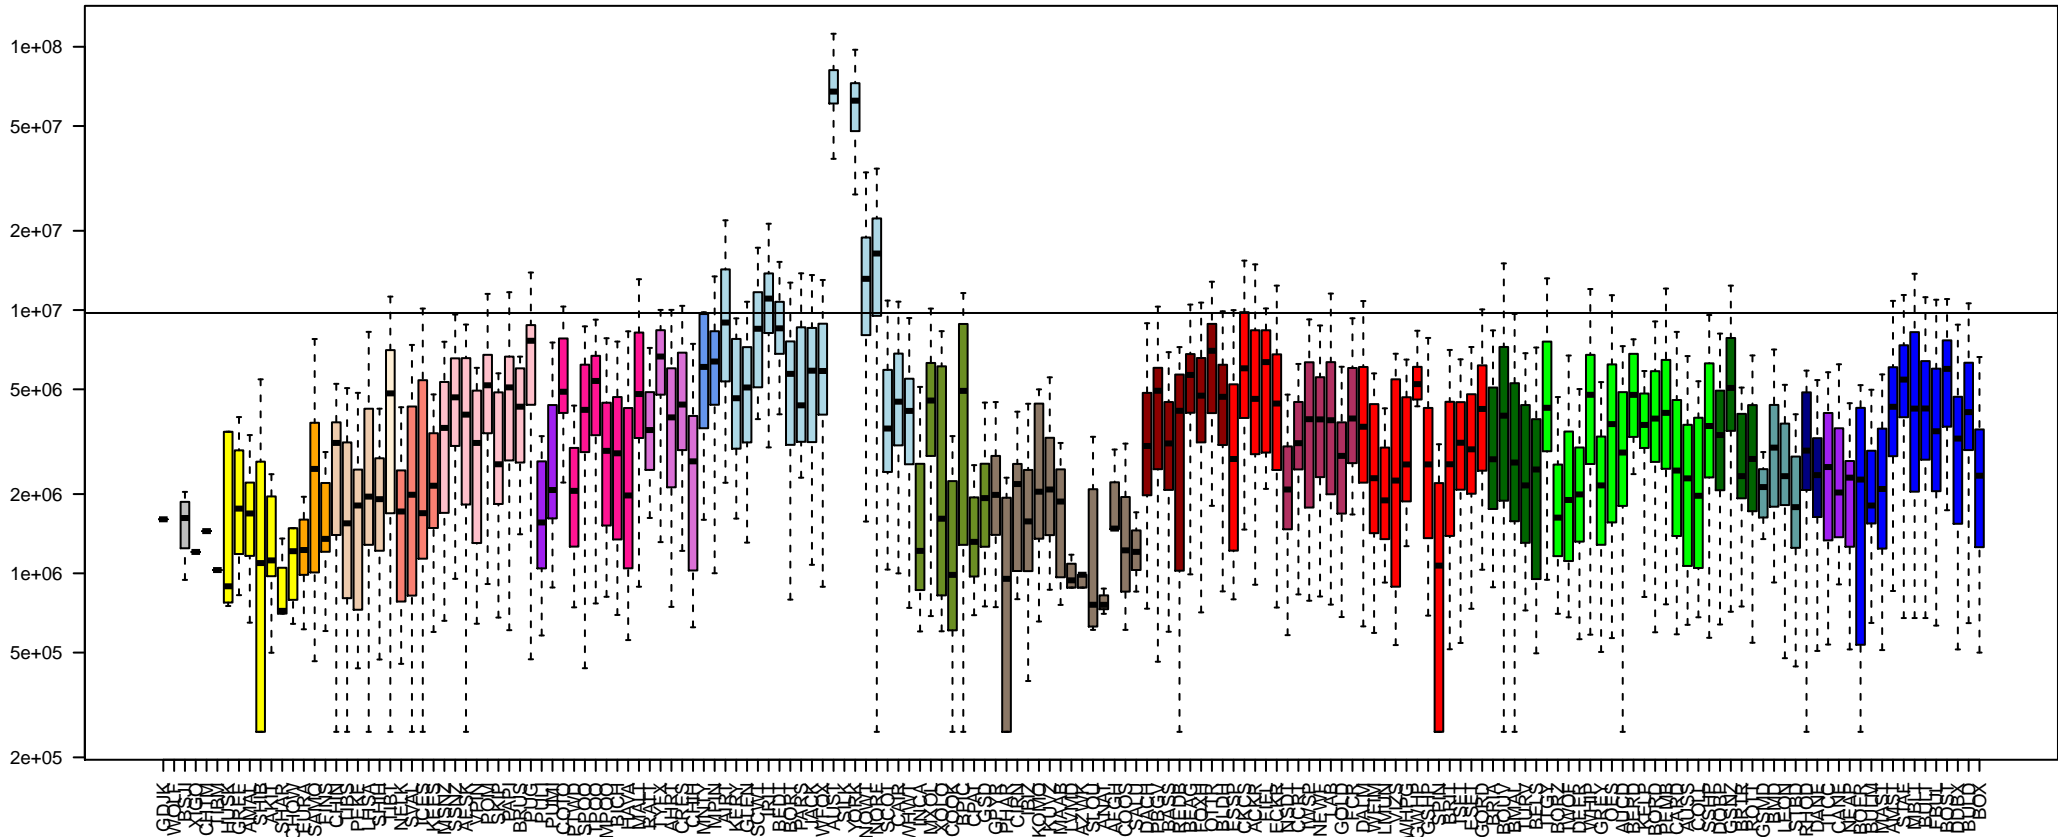

# Sloughi

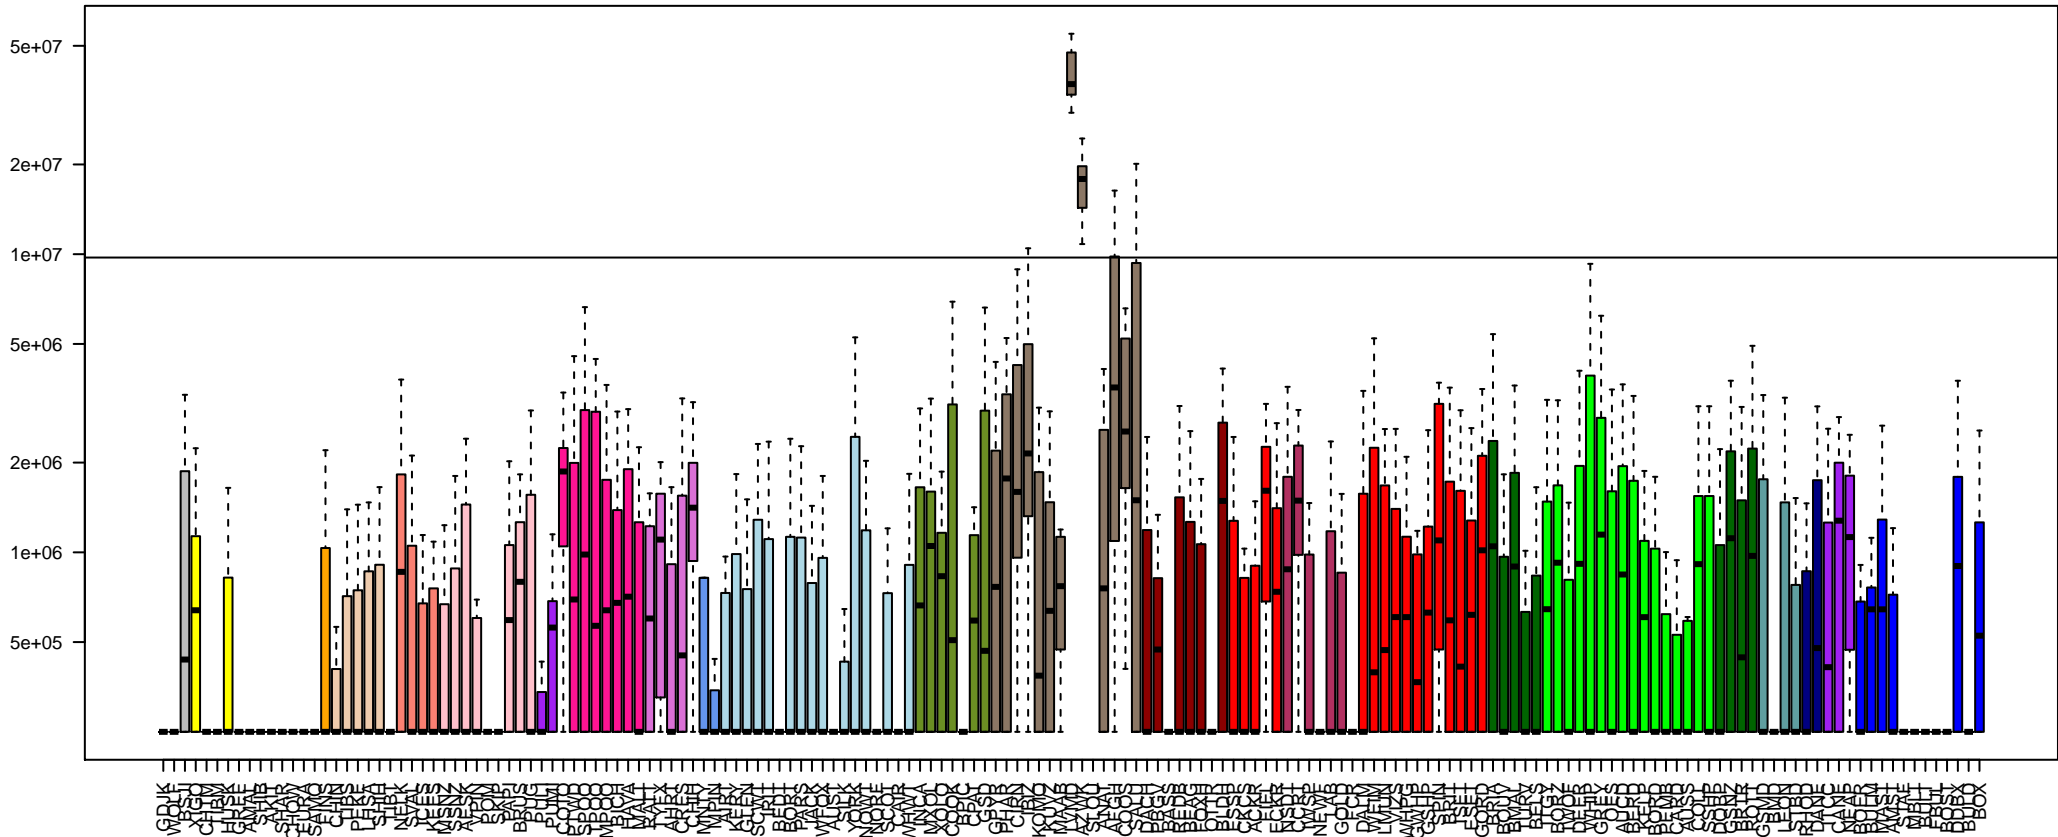

# Soft Coated Wheaten Terrier

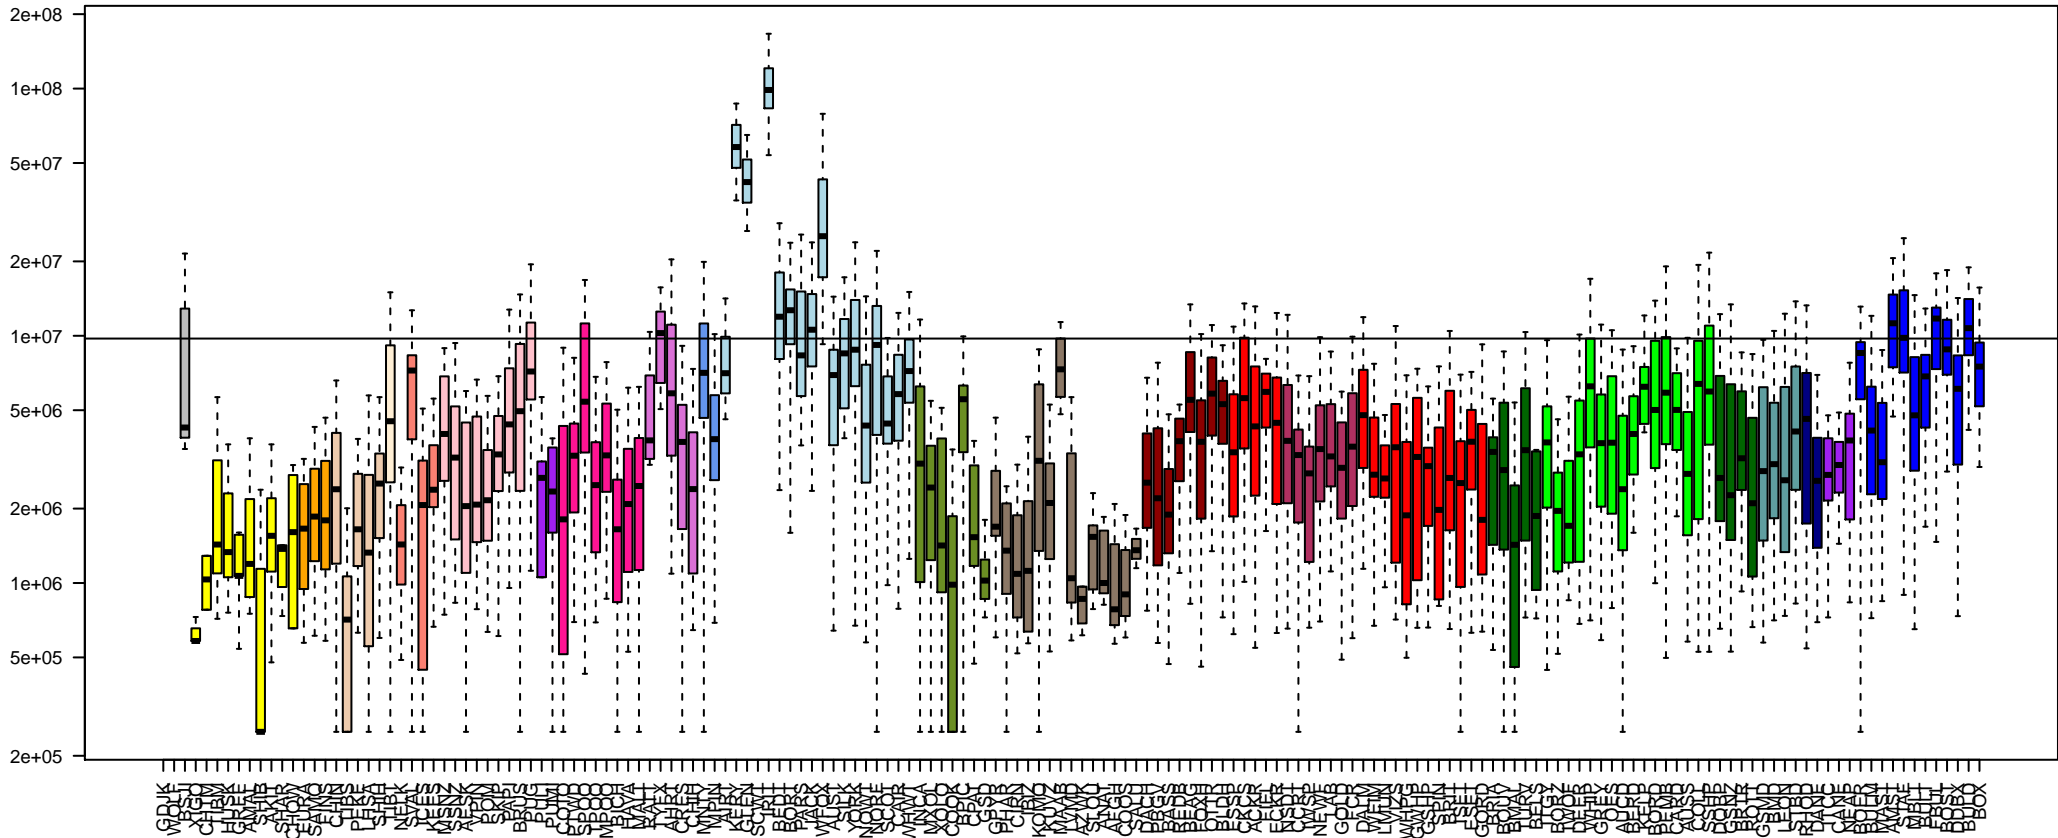



# Staffordshire Bull Terrier

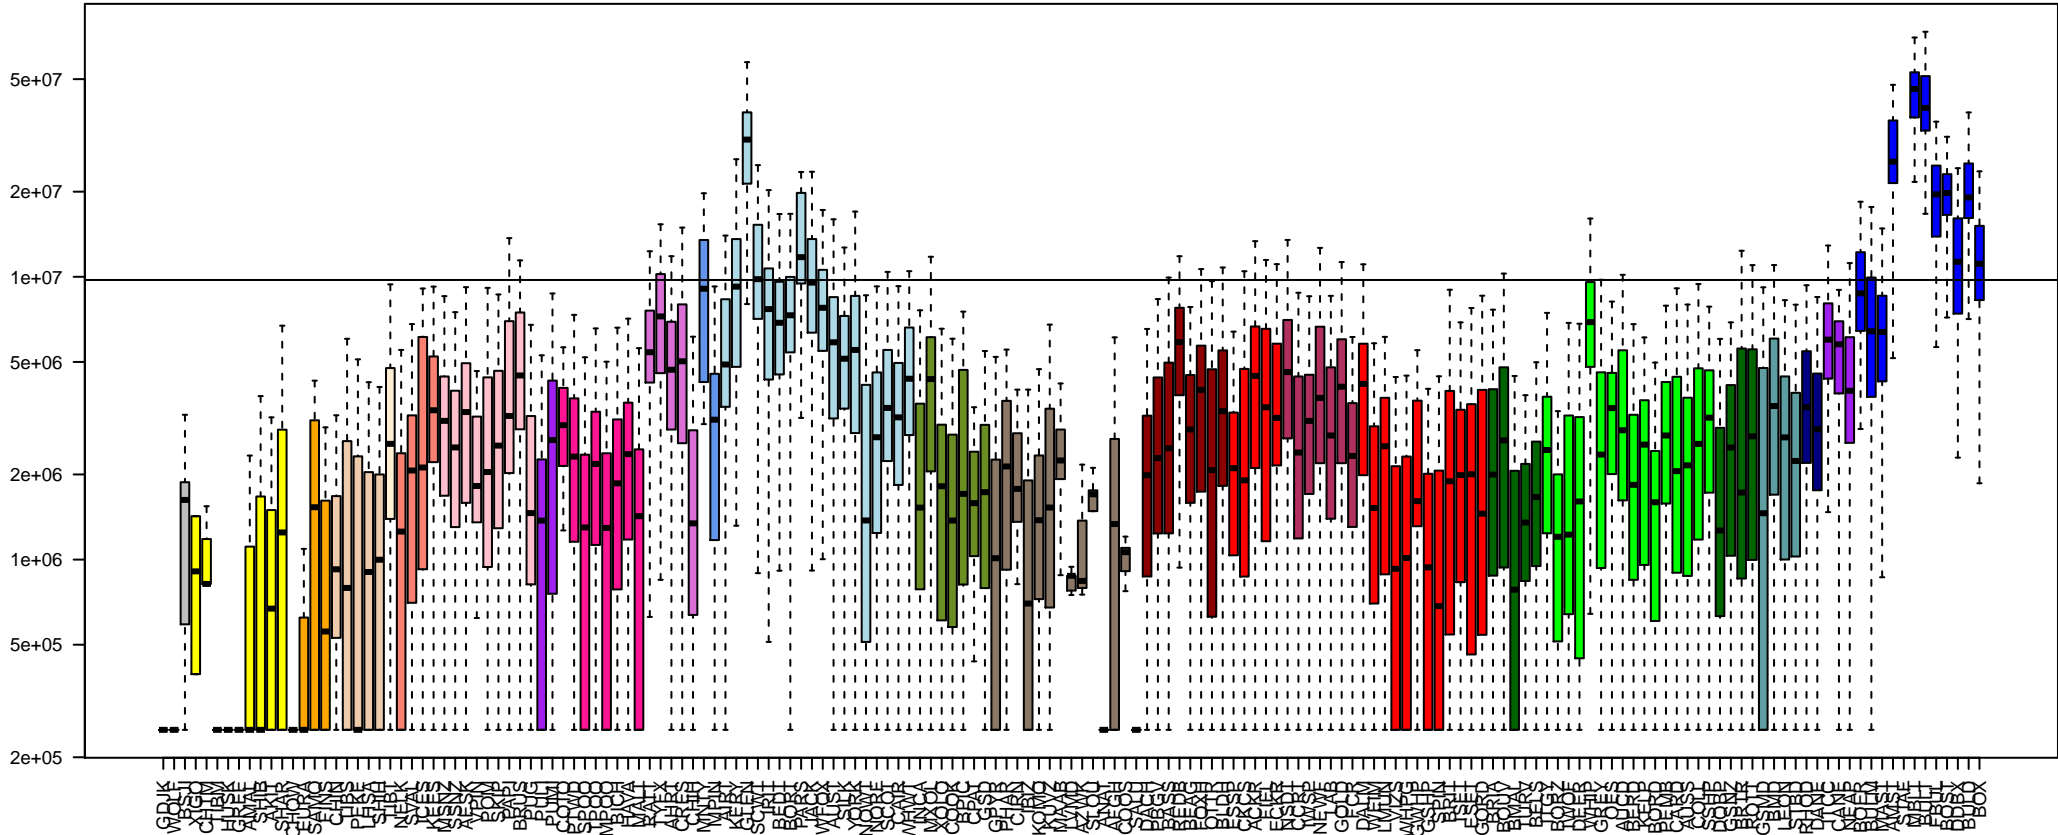



# Standard Schnauzer

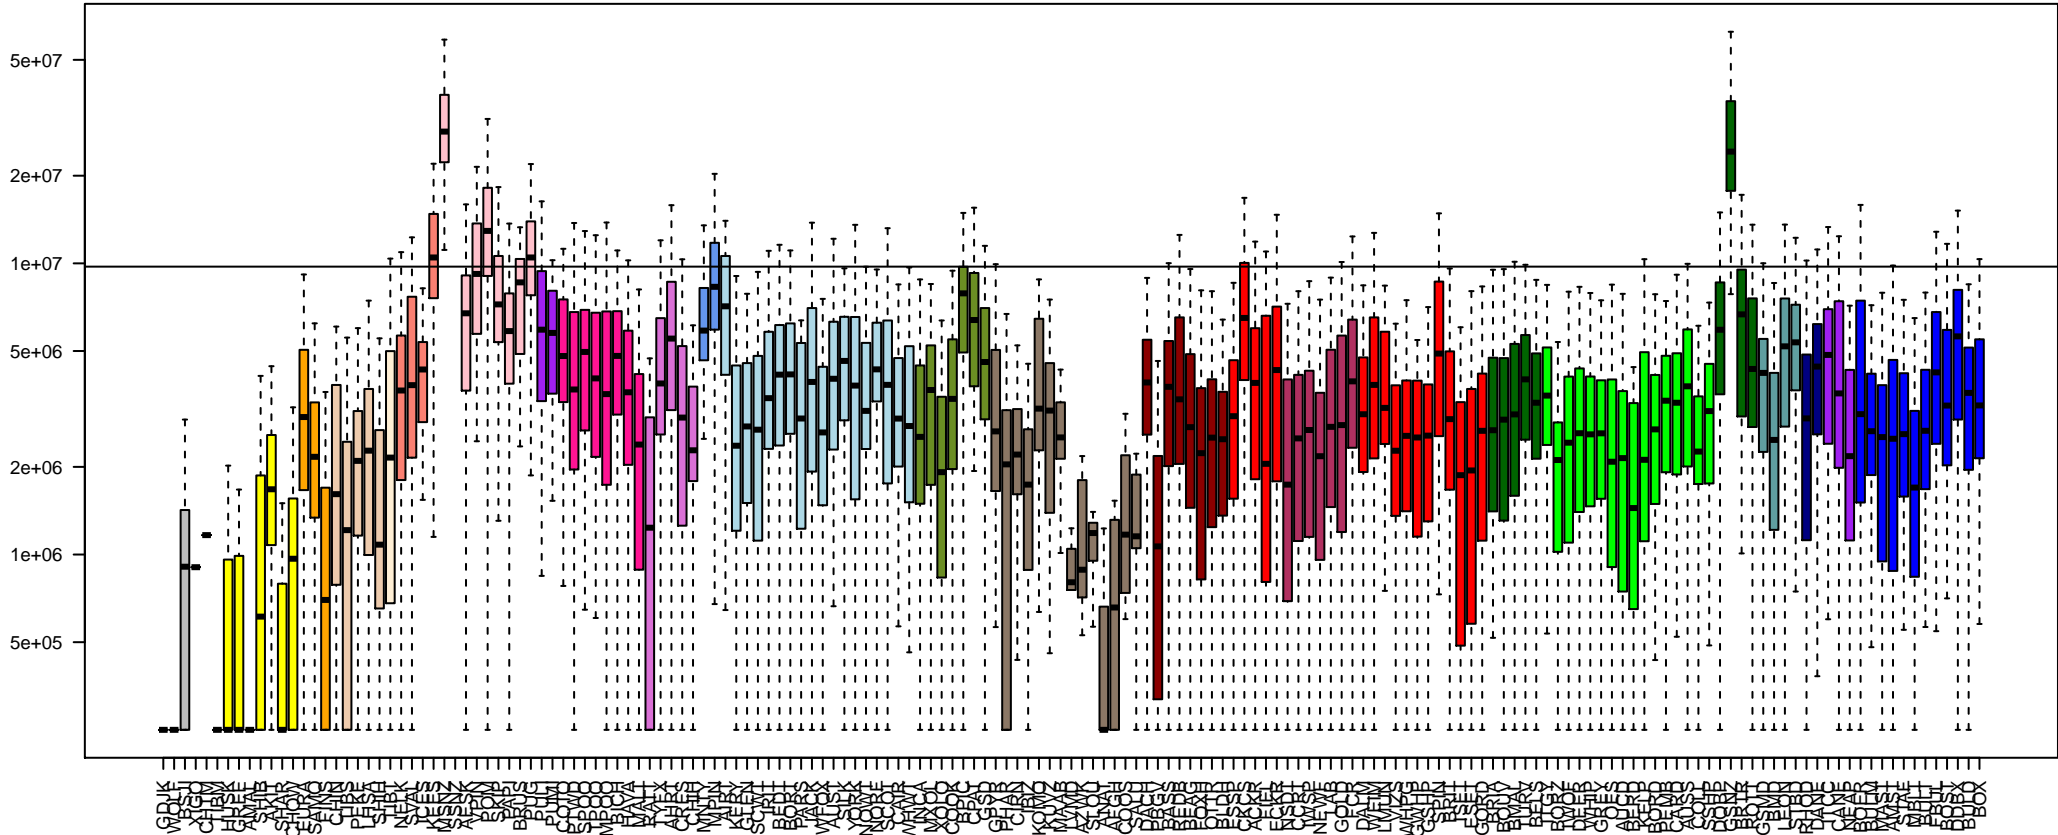

# Swedish Vallhund

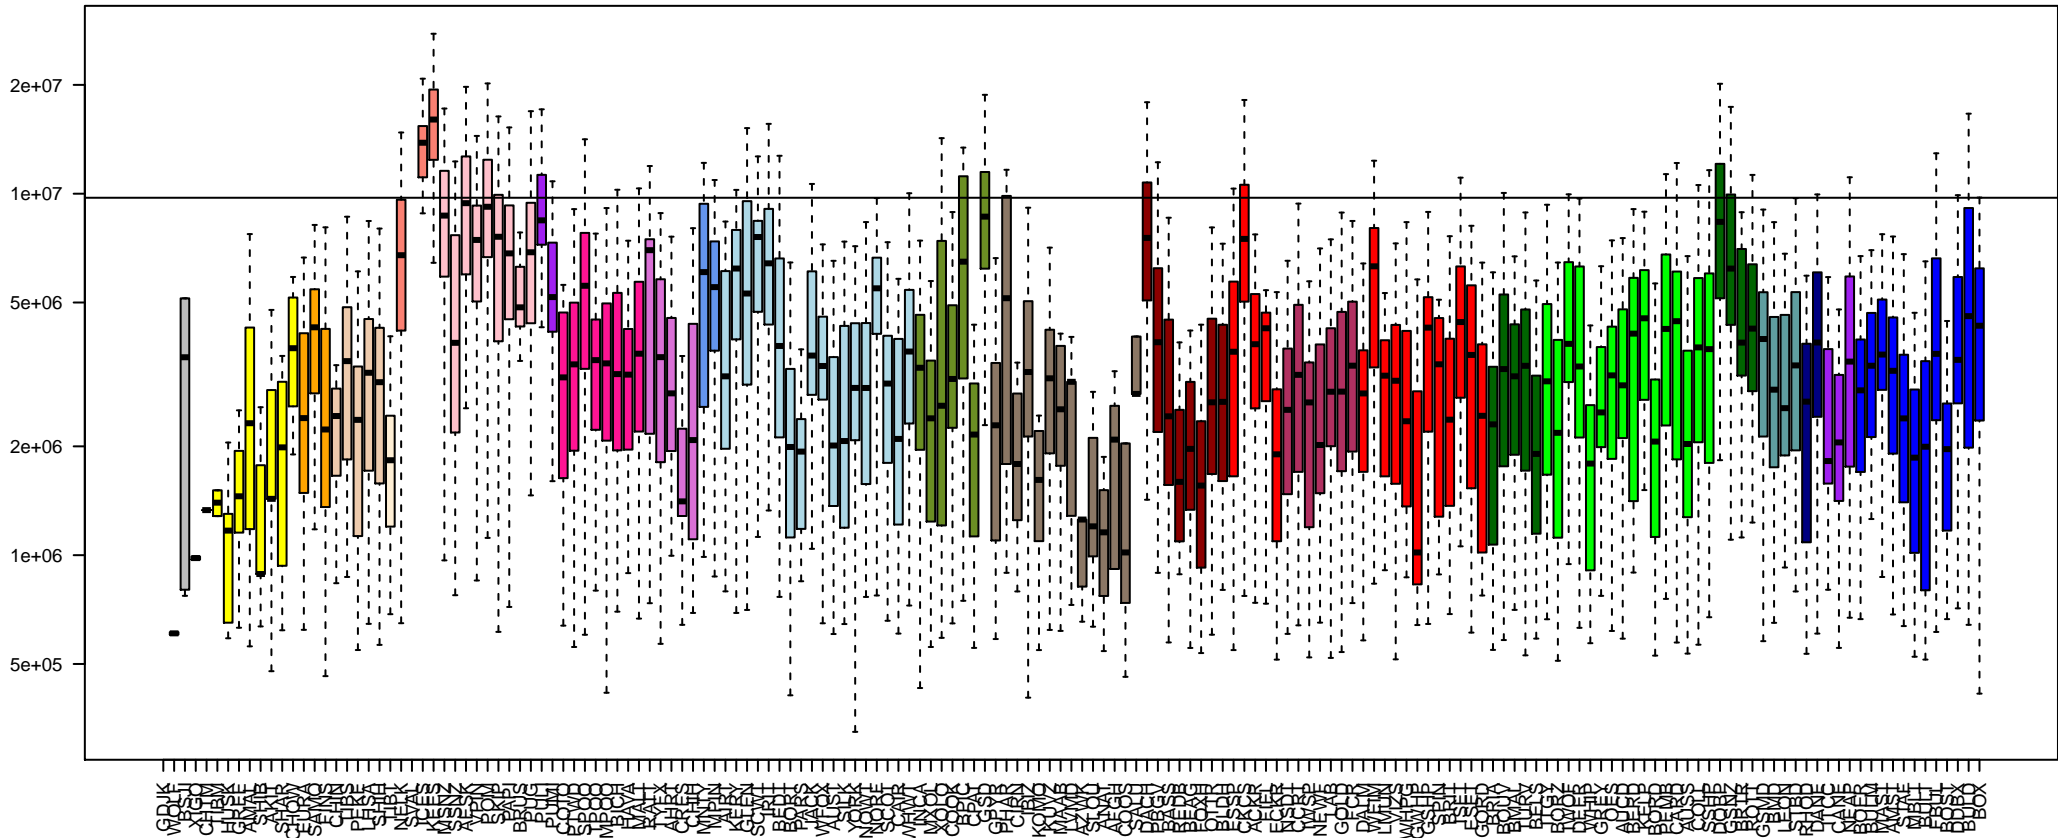



# Tibetan Mastiff – North American

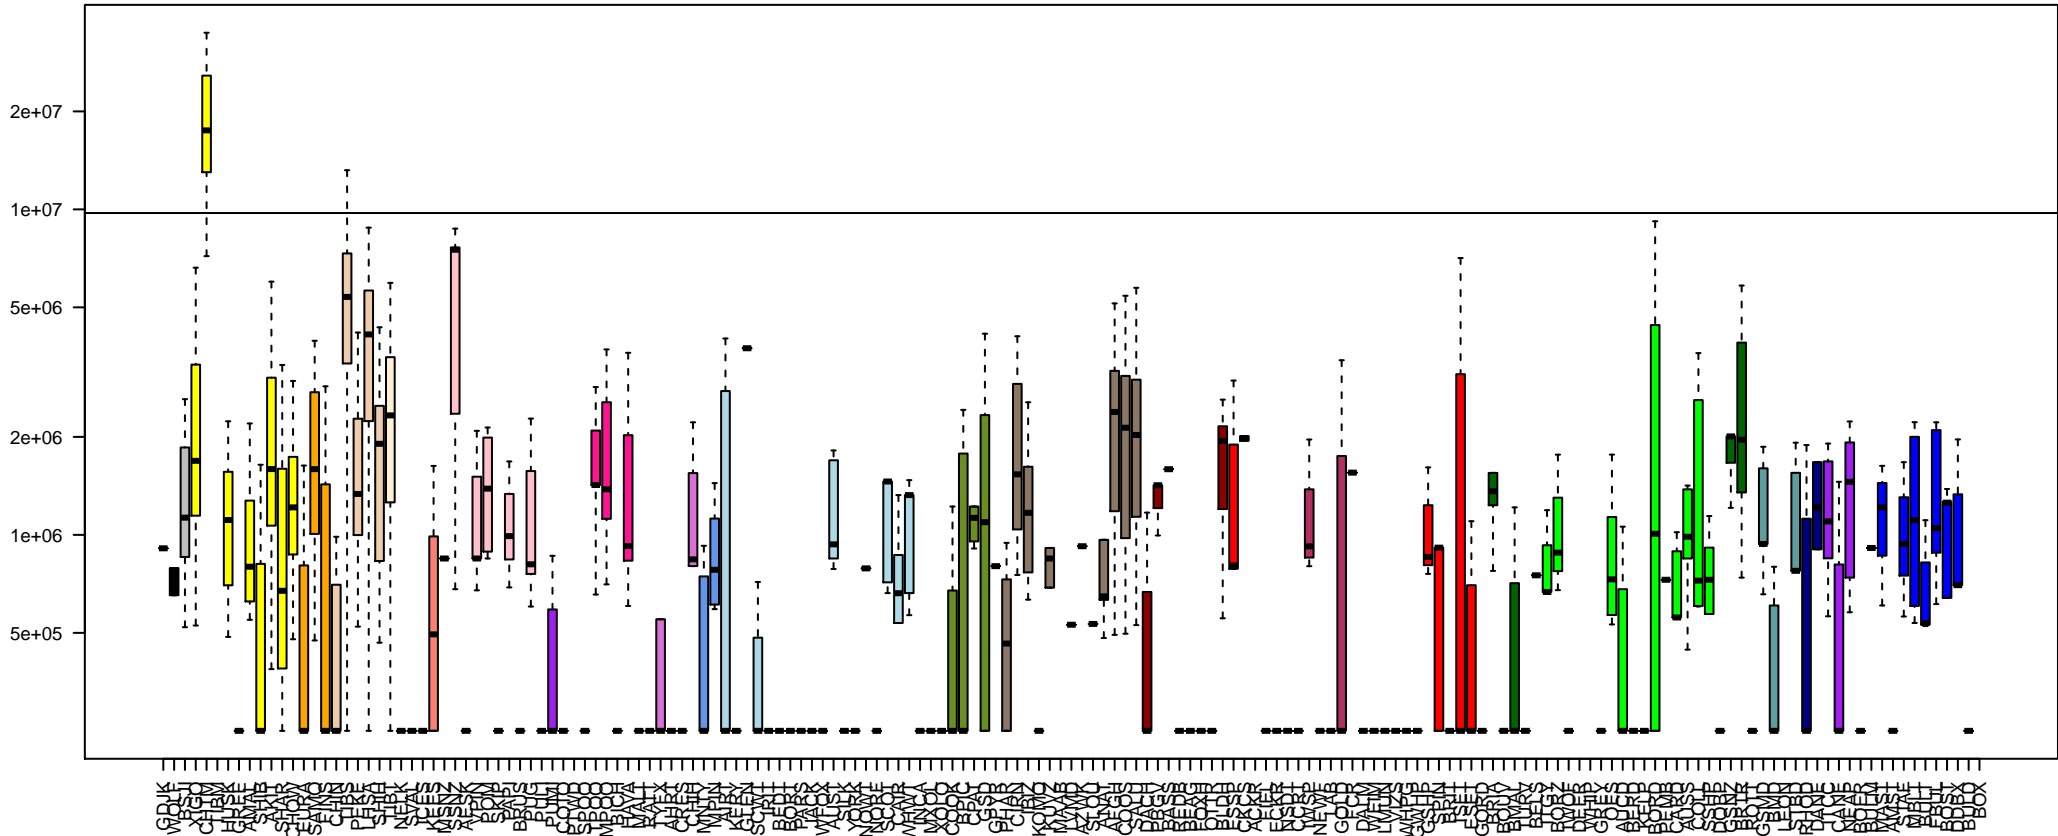

# Tibetan Spaniel

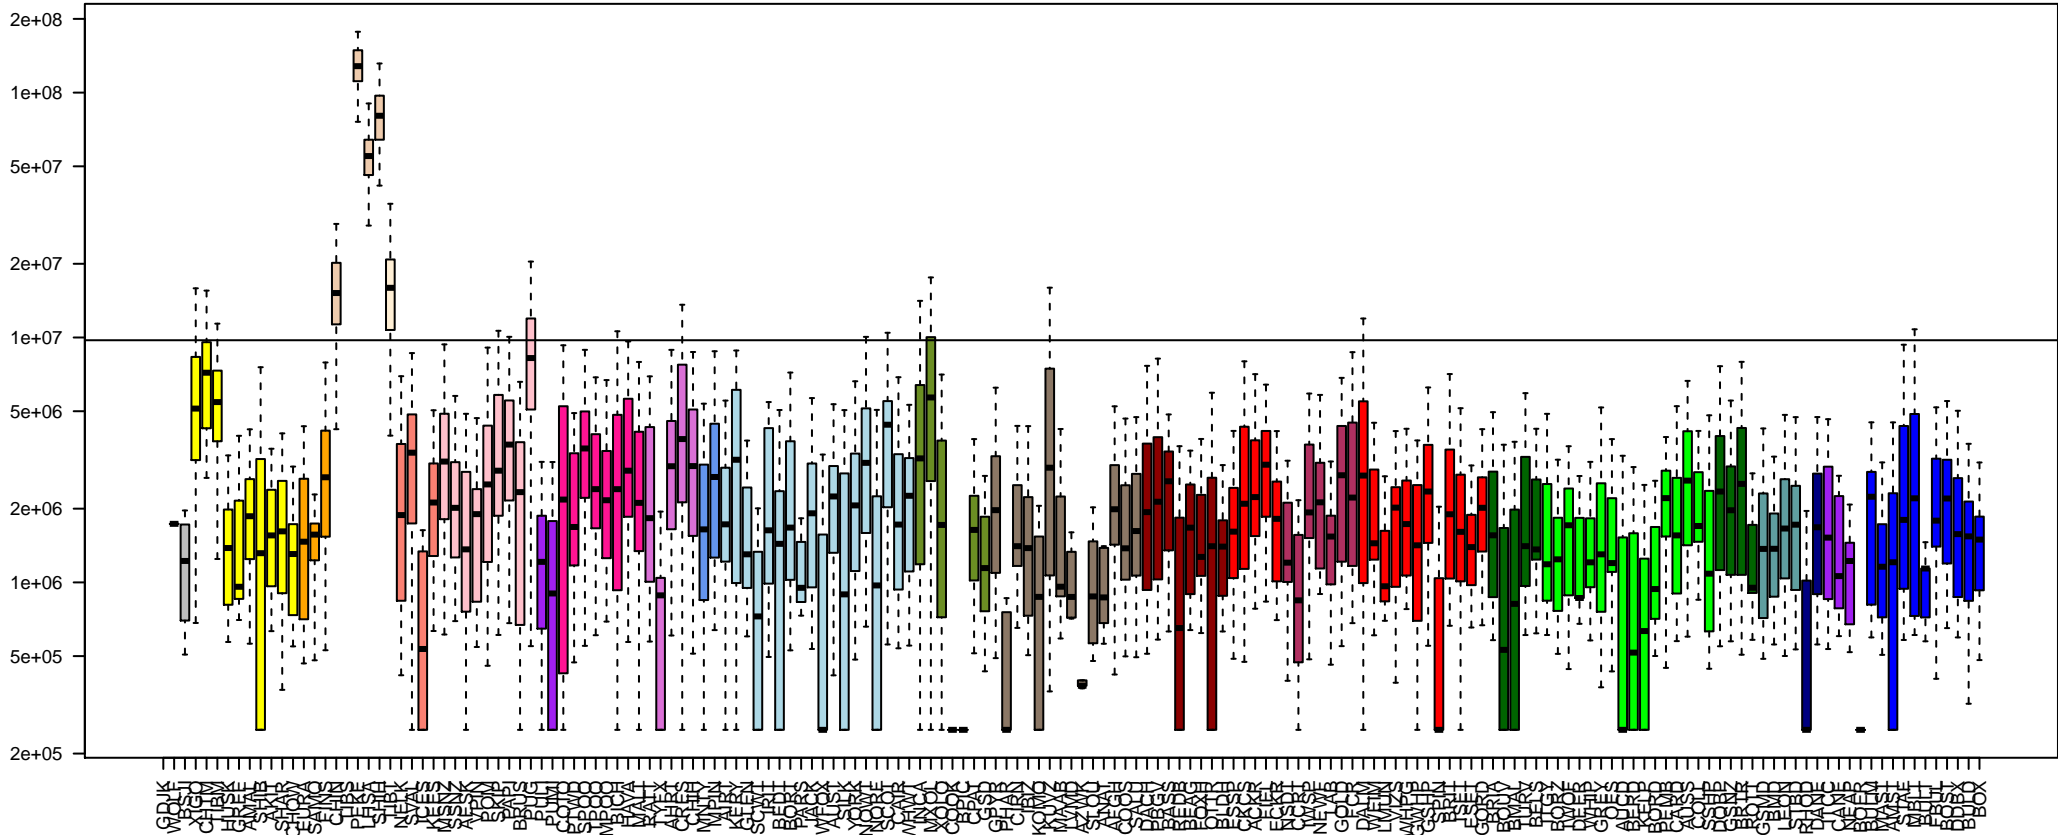

# Tibetan Terrier

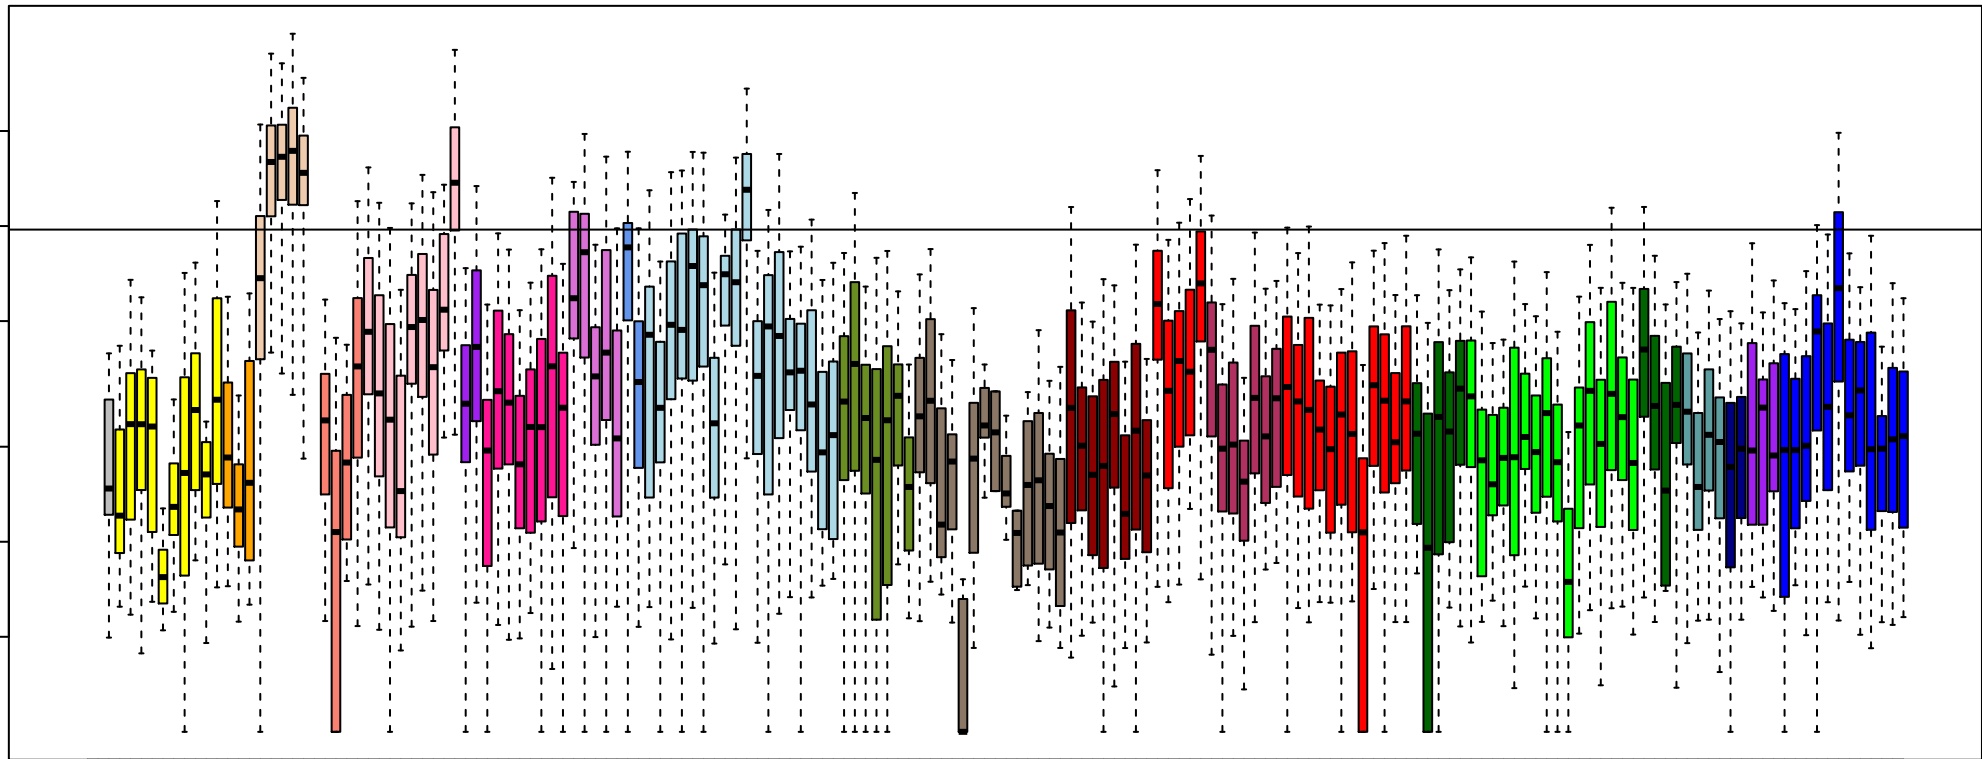

1 2 3 4 5 6 7 8 9 10 11 12 13 14 15 16 17 18 19 20 21 22 23 24 25 26 27 28 29 30 31 32 33 34 35 36 37 38 39 40 41 42 43 44 45 46 47 48 49 50 51 52 53 54 55 56 57 58 59 60 61 62 63 64 65 66 67 68 69 70 71 72 73 74 75 76 77 78 79 80 81 82 83 84 85 86 87 88 89 90 91 92 93 94 95 96 97 98 99 100 101 102 103 104 105 106 107 108 109 110 111 112 113 114 115 116 117 118 119 120 121 122 123 124 125 126 127 128 129 130 131 132 133 134 135 136 137 138 139 140 141 142 143 144 145 146 147 148 149 150 151 152 153 154 155 156 157 158 159 160 161 162 163 164 165 166 167 168 169 170 171 172 173 174 175 176 177 178 179 180 181 182 183 184 185 186 187 188 189 190 191 192 193 194 195 196 197 198 199 200



# Vizsla

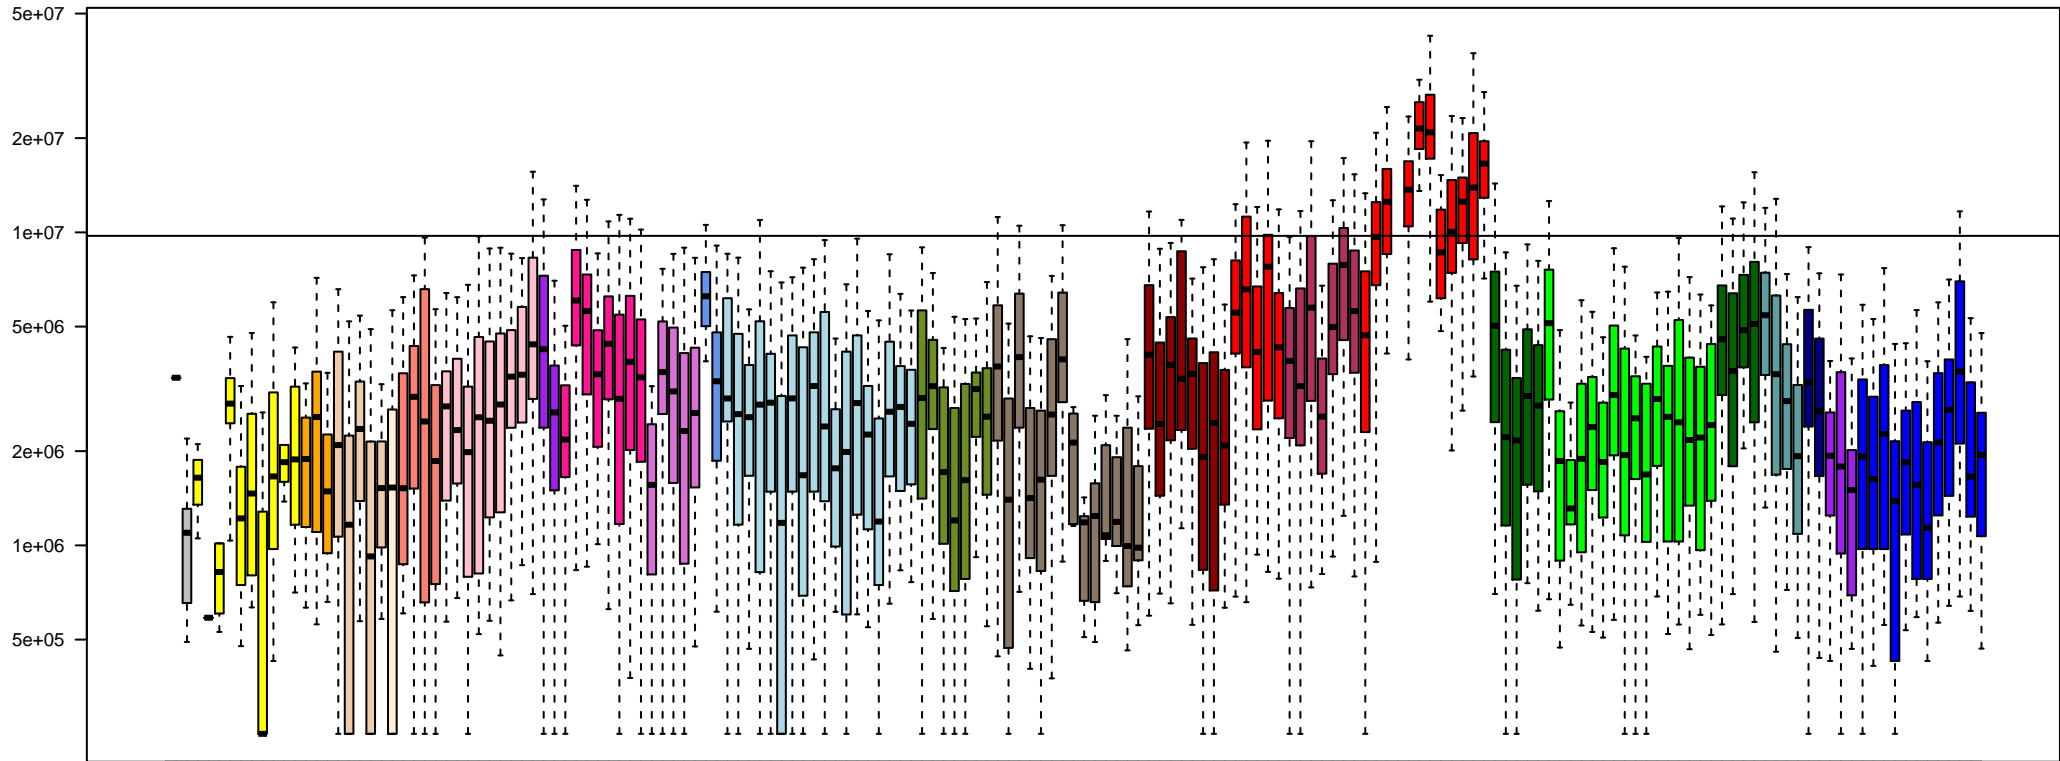

Small, rotated text labels along the x-axis, likely representing individual data points or sub-categories. The labels are densely packed and difficult to read due to their orientation and size.











# Wire Fox Terrier

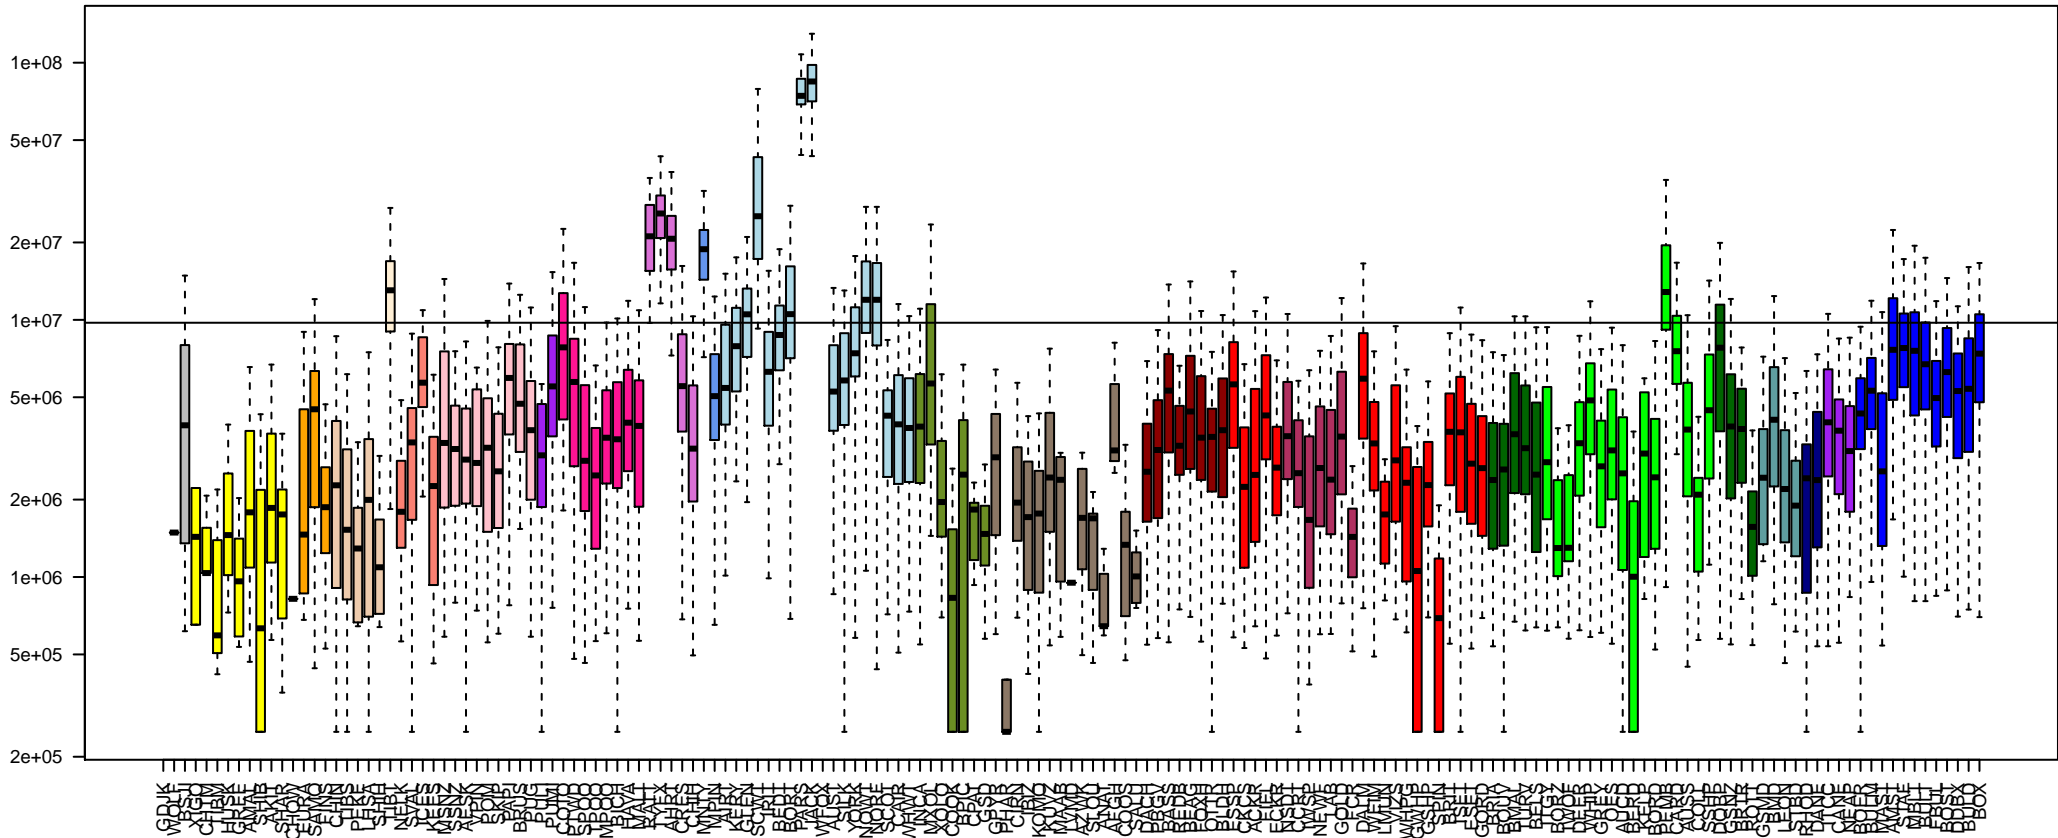



# Wolf

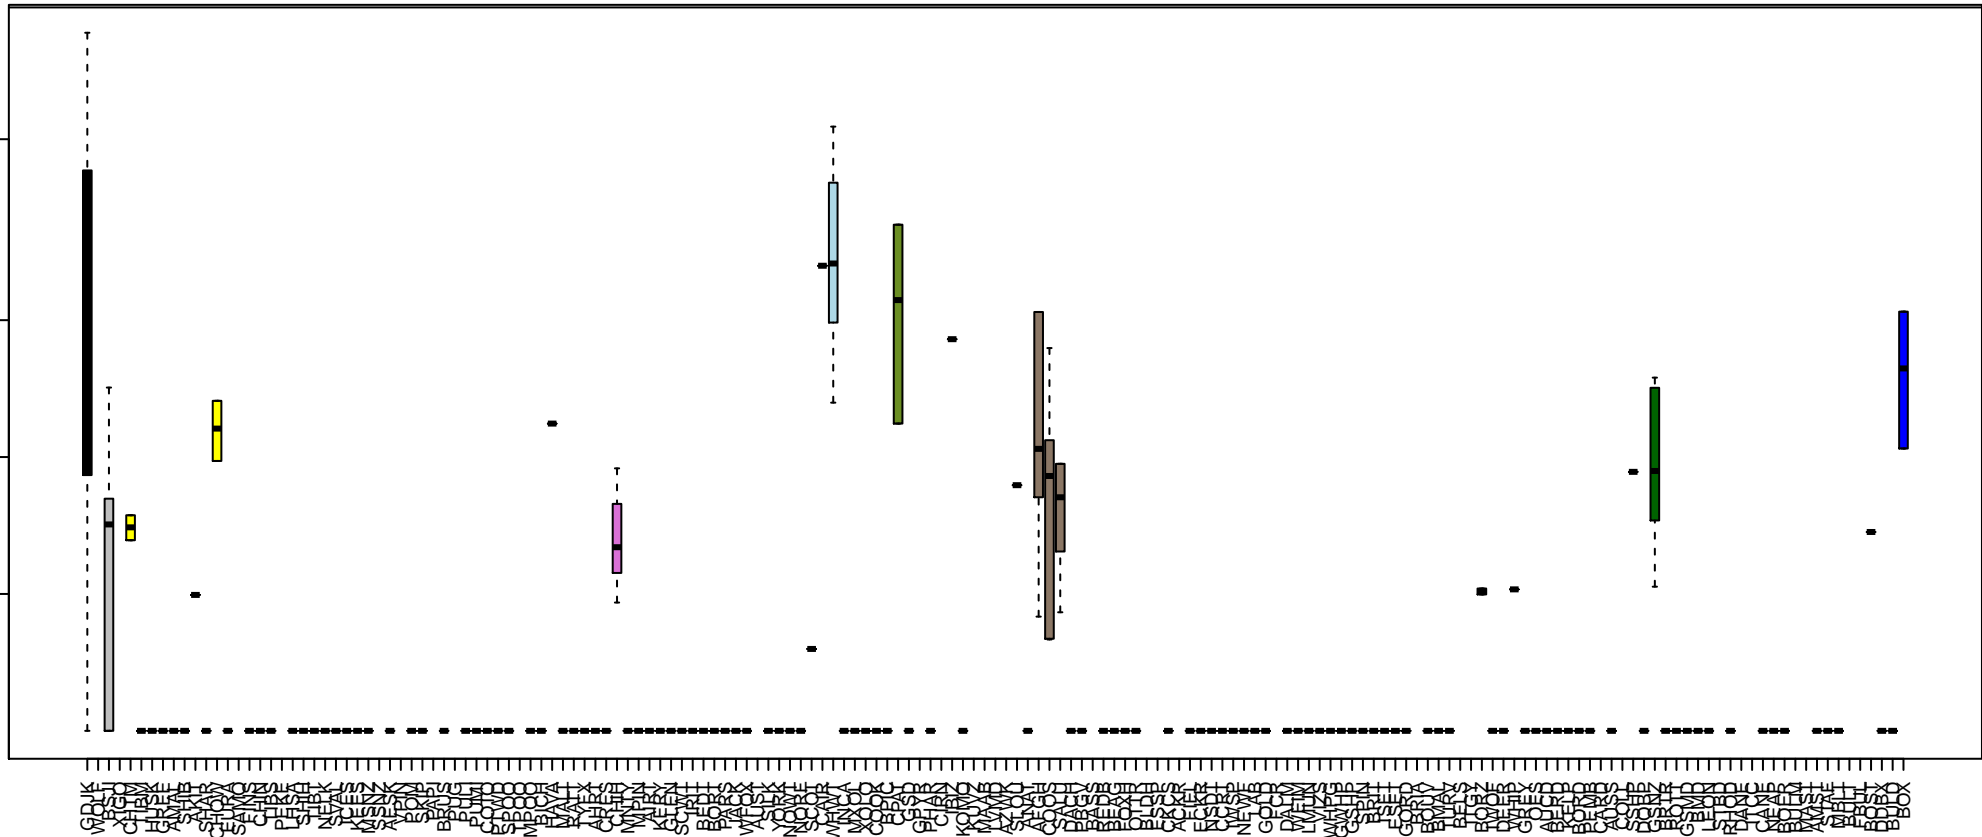

# Xigou

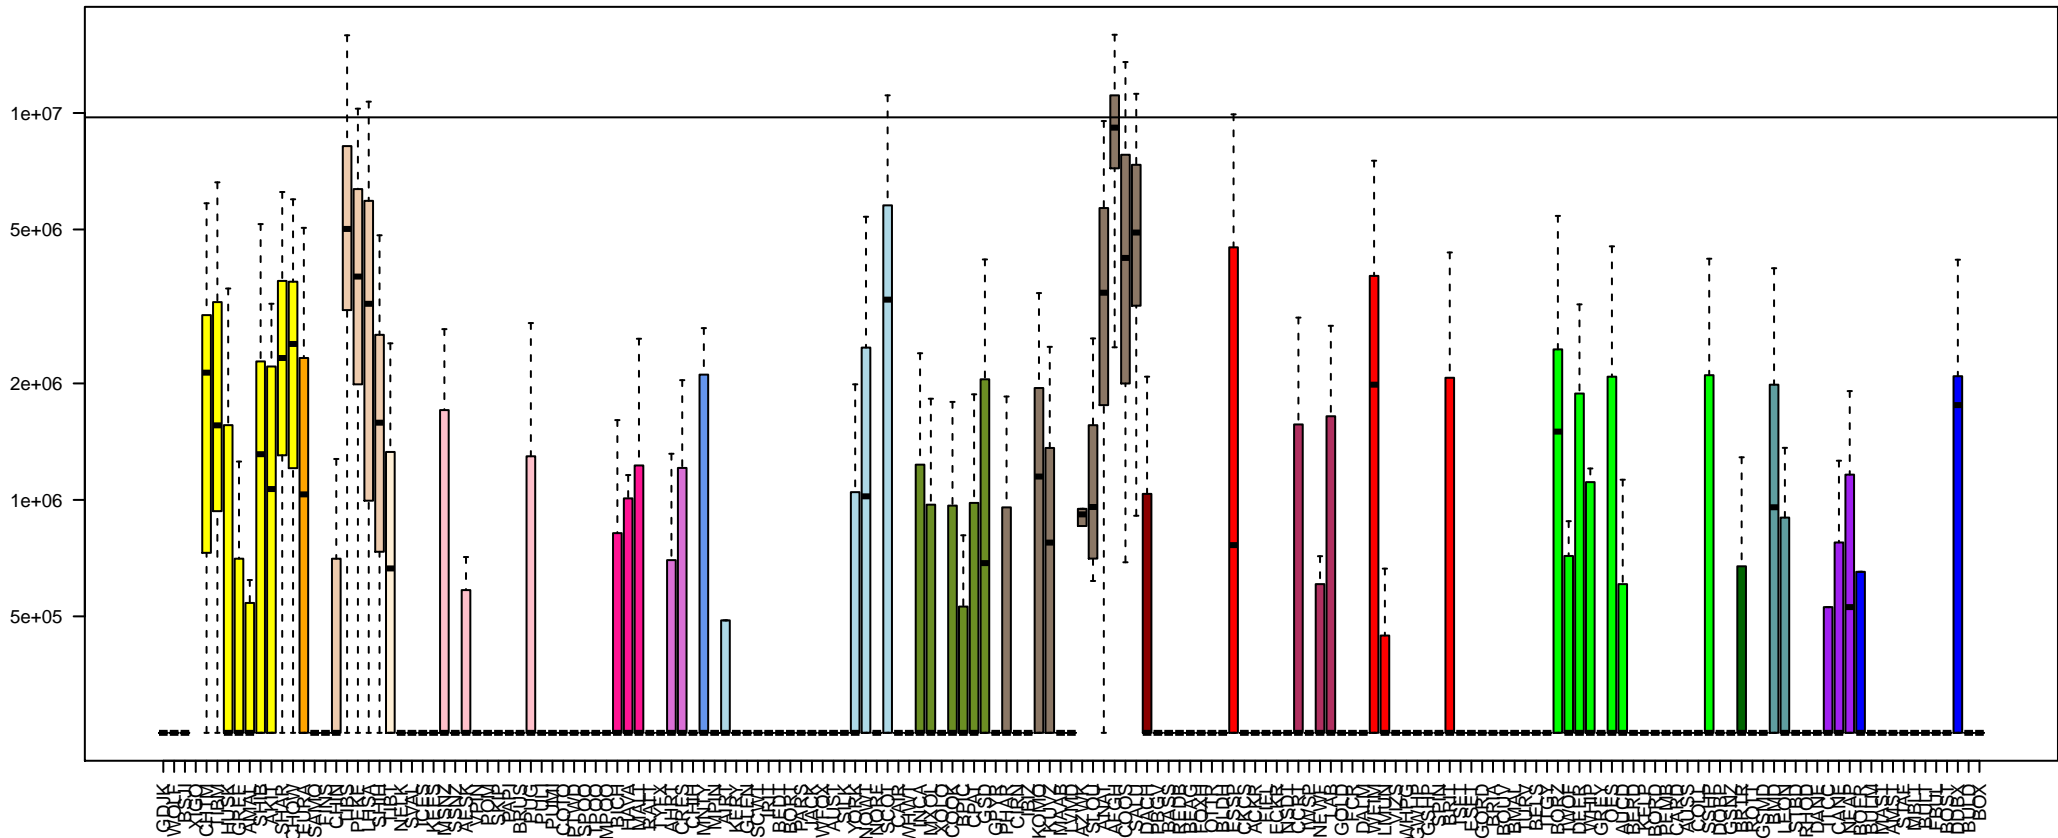



# Xoloitzcuintli

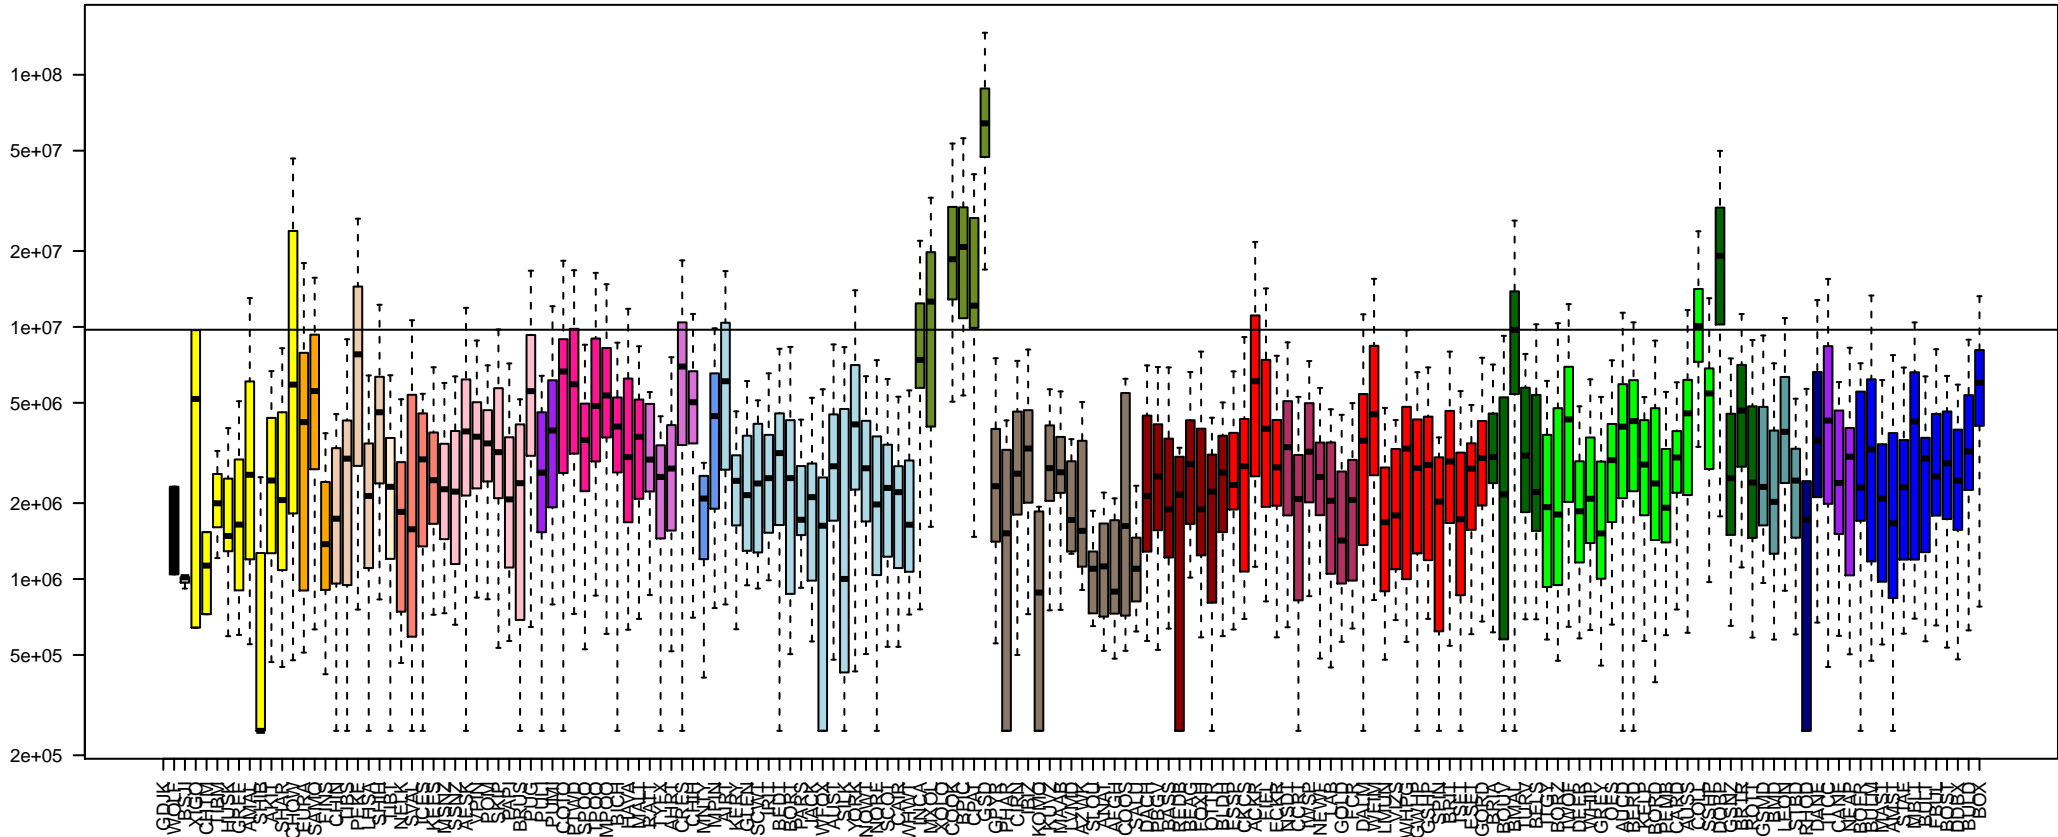

# Yorkshire Terrier

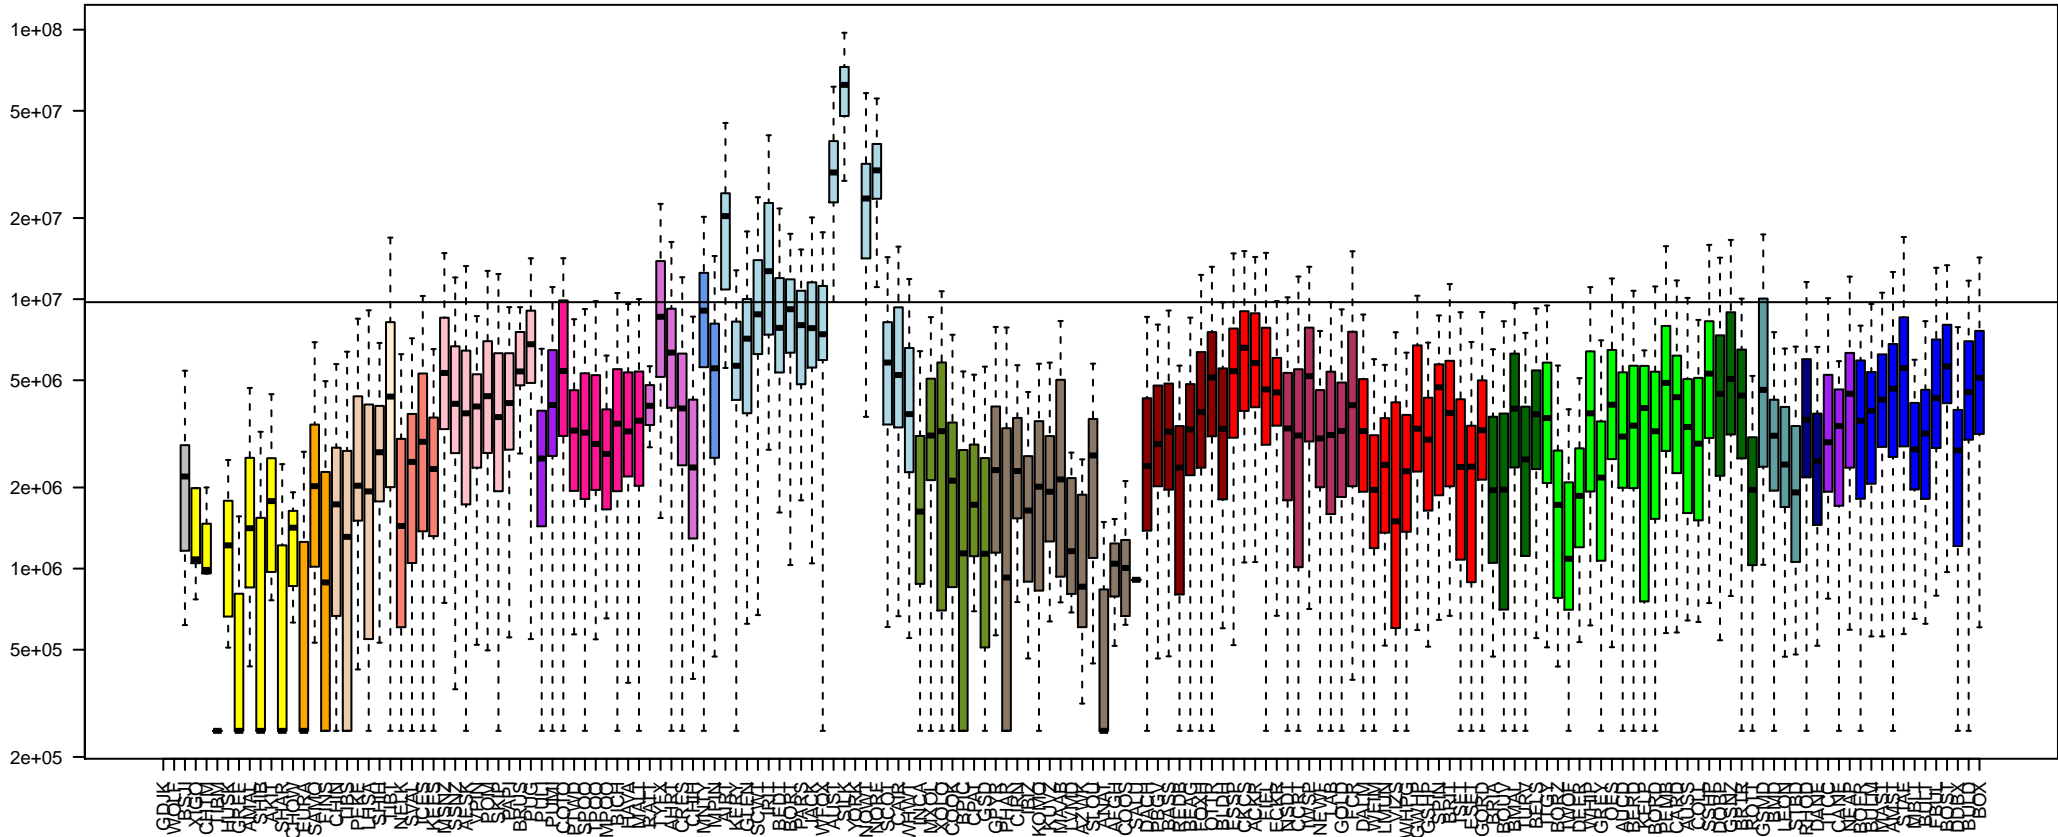

Supplement: NIHMS866262-supplement-3.pdf [file NIHMS866262-supplement-3.pdf]
