# Supplementary material
Source: PubMed Central journal article supplement (PMC5492993)
Supplement: NIHMS866262-supplement-5.pdf [file NIHMS866262-supplement-5.pdf]

#NEXUS

begin trees;

```
tree tree_1 = [&R] (((((((((((((((((((((((((((((((((((((((GSMD_28923:100.0,
((GSMD_28924:100.0,GSMD_21528:100.0):85.0,GSMD_21523:100.0):51.0):51.0,
(GSMD_25392:100.0,GSMD_12332:100.0):51.0):100.0,(((((((BMD_00GT37:100.0,BMD_00GT36:100.0):
100.0,BMD_004687:100.0):53.0,(BMD_00GT34:100.0,BMD_00GT33:100.0):57.0):54.0,
(BMD_004667:100.0,BMD_00GT35:100.0):60.0):72.0,BMD_000972:100.0):71.0,BMD_004679:100.0):
57.0,BMD_000983:100.0):100.0):100.0,((((((STBD_27062:100.0,(STBD_12748:100.0,STBD_06463:100.0):
100.0):49.0,STBD_06460:100.0):98.0,STBD_12750:100.0):89.0,
(((STBD_27082:100.0,STBD_27063:100.0):67.0,STBD_12747:100.0):100.0,STBD_12749:100.0):100.0):
100.0,STBD_01075:100.0):100.0,(((LEON_20045:100.0,LEON_20260:100.0):98.0,
(((LEON_29552:100.0,LEON_26916:100.0):100.0,LEON_20093:100.0):89.0,(LEON_20042:100.0,
(LEON_02215:100.0,LEON_20046:100.0):100.0,LEON_15580:100.0):100.0):88.0):99.0):
100.0,LEON_20115:100.0):100.0):100.0):99.0,((((((CANE_24520:100.0,
(CANE_24515:100.0,CANE_24548:100.0):100.0):100.0,CANE_24519:100.0):100.0,(((CANE_28921:100.0,
(CANE_27048:100.0,CANE_27352:100.0):100.0):100.0,(NEAP_23550:100.0,
(((NEAP_23555:100.0,NEAP_23564:100.0):97.0,(NEAP_23567:100.0,NEAP_23554:100.0):100.0):
98.0,NEAP_23551:100.0):100.0):100.0):100.0,CANE_24509:100.0):100.0):
100.0,((((((((((((((BULT_23674:100.0,BULT_23638:100.0):93.0,
(BULT_23678:100.0,BULT_23667:100.0):94.0):100.0,BULT_13291:100.0):100.0,
((BULT_23632:100.0,BULT_23631:100.0):100.0,BULT_23630:100.0):100.0):98.0,BULT_23695:100.0):
99.0,BULT_23661:100.0):98.0,MBLT_11470:100.0):99.0,((MBLT_11463:100.0,MBLT_11468:100.0):
100.0,MBLT_11474:100.0):98.0,((MBLT_11473:100.0,MBLT_11469:100.0):100.0):52.0,
(((MBLT_11472:100.0,MBLT_11465:100.0):100.0,MBLT_11467:100.0):100.0,MBLT_11464:100.0):100.0):
100.0,(((STAF_02991:100.0,((STAF_27382:100.0,(STAF_03137:100.0,STAF_03579:100.0):100.0):
94.0,STAF_03145:100.0):98.0,STAF_01361:100.0):97.0):96.0,(STAF_03144:100.0,STAF_03139:100.0):
100.0):86.0,STAF_02887:100.0):98.0,STAF_03163:100.0):100.0):100.0,
(((AMST_28499:100.0,AMST_Z6A12:100.0):99.0,(AMST_Z6E09:100.0,AMST_Z7B01:100.0):93.0):
100.0,AMST_29567:100.0):100.0,AMST_Z9A04:100.0):100.0):100.0,
((((((((((BOX_027928:100.0,BOX_000997:100.0):100.0,(BOX_028503:100.0,(BOX_028501:100.0,
(BOX_001179:100.0,BOX_012966:100.0):63.0):65.0,BOX_027200:100.0):65.0):100.0):
100.0,BOX_027190:100.0):100.0,BOX_027749:100.0):100.0,BOX_001177:100.0):100.0,
((BULD_03556:100.0,BULD_14499:100.0):100.0,(((BULD_14474:100.0,
(BULD_14476:100.0,EBD_0GT156:100.0):96.0):100.0,EBD_0GT154:100.0):55.0,
(EBD_0GT153:100.0,EBD_0GT155:100.0):80.0):84.0,EBD_0GT157:100.0):100.0,BULD_03589:100.0):
100.0):100.0,(((DDBX_24934:100.0,DDBX_25487:100.0):100.0,
((DDBX_24930:100.0,DDBX_24931:100.0):79.0,DDBX_24933:100.0):100.0):100.0,DDBX_24936:100.0):
100.0):76.0,((((((BOST_00965:100.0,BOST_08698:100.0):96.0,BOST_05413:100.0):
100.0,BOST_08700:100.0):97.0,(BOST_12341:100.0,BOST_08701:100.0):90.0):61.0,
(BOST_05412:100.0,BOST_08704:100.0):49.0):48.0,(BOST_00950:100.0,BOST_08707:100.0):90.0):100.0,
(((FBUL_27595:100.0,FBUL_27594:100.0):94.0,(((FBUL_28500:100.0,
(FBUL_13145:100.0,FBUL_16072:100.0):100.0,FBUL_07304:100.0):100.0):95.0,FBUL_14477:100.0):
100.0,FBUL_16073:100.0):100.0,FBUL_14473:100.0):100.0):100.0,FBUL_16071:100.0):100.0):76.0):
73.0):100.0,(((BOER_22A07:100.0,BOER_18F01:100.0):100.0,BOER_18F10:100.0):100.0,
((((((MAST_21270:100.0,MAST_15585:100.0):78.0,(MAST_02298:100.0,
(MAST_24147:100.0,MAST_05512:100.0):98.0):48.0):47.0,(MAST_02299:100.0,MAST_01016:100.0):58.0):
53.0,(MAST_00991:100.0,MAST_06392:100.0):68.0):99.0,MAST_02297:100.0):100.0,
((((((BULM_01110:100.0,BULM_28920:100.0):72.0,(BULM_01116:100.0,
(BULM_01107:100.0,BULM_14500:100.0):72.0):71.0):100.0,BULM_26414:100.0):53.0,
(BULM_01112:100.0,BULM_01125:100.0):46.0):85.0,(BULM_01126:100.0,BULM_01113:100.0):85.0):
100.0):100.0):100.0):98.0,(((RHOD_12B06:100.0,RHOD_13E12:100.0):100.0,
(((RHOD_15G12:100.0,RHOD_13C11:100.0):99.0,(RHOD_12H05:100.0,RHOD_15A08:100.0):99.0):98.0,
(RHOD_42D06:100.0,RHOD_14B10:100.0):99.0):100.0,RHOD_13H11:100.0):100.0):100.0,
(((DANE_26647:100.0,DANE_06610:100.0):100.0,(DANE_06694:100.0,DANE_06695:100.0):100.0):
100.0,DANE_12993:100.0):100.0,(((DANE_27184:100.0,DANE_15290:100.0):100.0,DANE_21529:100.0):
80.0,(DANE_12992:100.0,DANE_13574:100.0):44.0):100.0):100.0):99.0):88.0,
((((((((((ROTT_27544:100.0,ROTT_13005:100.0):100.0,ROTT_15437:100.0):52.0,
(ROTT_01014:100.0,Rtw_0GT353:100.0):100.0):100.0,(Rtw_0GT352:100.0,Rtw_0GT355:100.0):60.0):
93.0,(ROTT_21895:100.0,Rtw_0GT351:100.0):100.0):100.0,Rtw_0GT354:100.0):100.0,
(((BRTR_15419:100.0,BRTR_15422:100.0):100.0,BRTR_15420:100.0):72.0,BRTR_15424:100.0):100.0):
100.0,(((GSNZ_13261:100.0,(((GSNZ_12317:100.0,GSNZ_13267:100.0):100.0,GSNZ_13273:100.0):100.0,
(GSNZ_13235:100.0,GSNZ_07996:100.0):98.0,GSNZ_13553:100.0):100.0):84.0):
84.0,GSNZ_16154:100.0):84.0,(GSNZ_13262:100.0,GSNZ_13276:100.0):84.0):100.0):100.0,
((((((DOBP_06082:100.0,DOBP_06043:100.0):68.0,DOBP_06072:100.0):100.0,DOBP_06079:100.0):
100.0,DOBP_01031:100.0):100.0,(((Dob_0LU152:100.0,(Dob_0LU148:100.0,Dob_0LU151:100.0):100.0):
81.0,Dob_0LU150:100.0):100.0,Dob_0LU149:100.0):100.0):100.0):95.0):42.0,
((((((((((BORD_28463:100.0,(BORD_27579:100.0,BORD_12713:100.0):100.0):67.0,
(((BoC_00GT62:100.0,BoC_00GT56:100.0):100.0,BoC_00GT65:100.0):73.0,BoC_00GT64:100.0):100.0):
```

100.0, BORD\_28461:100.0):100.0, BORD\_11125:100.0):100.0, BoC\_00GT66:100.0):100.0,  
(KELP\_09320:100.0, KELP\_09350:100.0):100.0):96.0, ((BERD\_34H11:100.0, BERD\_35H12:100.0):  
100.0, BERD\_25G02:100.0):100.0):100.0, ((((((CARD\_07328:100.0,  
(CARD\_09284:100.0, CARD\_07666:100.0):100.0, (CARD\_07670:100.0, CARD\_07976:100.0):99.0):  
100.0, CARD\_07654:100.0):100.0, (CARD\_09285:100.0, (CARD\_06200:100.0, CARD\_06199:100.0):100.0):  
100.0):100.0, CARD\_09283:100.0):100.0, ((((((PEMB\_06681:100.0, PEMB\_06631:100.0):  
100.0, PEMB\_06638:100.0):100.0, PEMB\_07293:100.0):99.0, (PEMB\_06642:100.0, PEMB\_06630:100.0):  
100.0):100.0, PEMB\_06640:100.0):86.0, PEMB\_28457:100.0):82.0, PEMB\_06636:100.0):  
86.0, PEMB\_09017:100.0):100.0):100.0, ((((((SSHP\_27148:100.0, SSHP\_27150:100.0):100.0,  
(SSHP\_27147:100.0, SSHP\_28479:100.0):100.0, (SSHP\_27126:100.0, SSHP\_26992:100.0):100.0):  
100.0, SSHP\_27440:100.0):89.0, SSHP\_28480:100.0):98.0):96.0, SSHP\_11617:100.0):  
100.0, SSHP\_28528:100.0):100.0, ((((((COLL\_11451:100.0, COLL\_00379:100.0):100.0,  
(COLL\_07303:100.0, (COLL\_28482:100.0, COLL\_07296:100.0):100.0):100.0):94.0, COLL\_00374:100.0):  
94.0, COLL\_11454:100.0):94.0, COLL\_28507:100.0):100.0, COLL\_07298:100.0):100.0, COLL\_07300:100.0):  
100.0):100.0, ((((((AUSS\_11429:100.0, AUSS\_07314:100.0):100.0, (AUSS\_28465:100.0,  
(AUSS\_28472:100.0, AUSS\_11425:100.0):100.0, AUSS\_13157:100.0):87.0):94.0):  
100.0, AUSS\_11428:100.0):100.0, AUSS\_28454:100.0):95.0, AUSS\_27104:100.0):100.0, AUSS\_27573:100.0):  
100.0):72.0):72.0):99.0, (AUCD\_15D09:100.0, ((((((AUCD\_09994:100.0, AUCD\_15C07:100.0):  
100.0, AUCD\_15C05:100.0):100.0, (AUCD\_15C09:100.0, AUCD\_25269:100.0):100.0):  
93.0, AUCD\_18G11:100.0):100.0, (AUCD\_19H09:100.0, AUCD\_19A10:100.0):100.0):  
100.0, AUCD\_31H04:100.0):100.0):100.0):100.0, (((OES\_005984:100.0,  
(OES\_005951:100.0, OES\_005957:100.0):82.0, OES\_005944:100.0):84.0):82.0,  
(OES\_005990:100.0, OES\_006014:100.0):100.0, (OES\_005966:100.0, OES\_005941:100.0):92.0):82.0):  
78.0, OES\_006003:100.0):100.0):93.0, ((((((ITGY\_28389:100.0, (ITGY\_08506:100.0, ITGY\_08502:100.0):  
100.0, (ITGY\_26972:100.0, ITGY\_28387:100.0):100.0, ITGY\_27353:100.0):72.0):100.0):  
87.0, ITGY\_15288:100.0):100.0, ITGY\_06386:100.0):100.0, ITGY\_28393:100.0):100.0, ITGY\_28390:100.0):  
100.0, (((((GREY\_14237:100.0, ((Gry\_0GT246:100.0, GREY\_14239:100.0):96.0,  
(GREY\_12320:100.0, GREY\_13678:100.0):100.0):95.0, (Gry\_0GT248:100.0, GREY\_14238:100.0):96.0):  
99.0):100.0, (Gry\_0GT244:100.0, (Gry\_0GT245:100.0, Gry\_0GT247:100.0):100.0):100.0):100.0,  
(WHIP\_09886:100.0, WHIP\_09932:100.0):100.0, WHIP\_27374:100.0):100.0,  
(WHIP\_27181:100.0, WHIP\_09887:100.0):100.0, WHIP\_27375:100.0):100.0):100.0,  
(WHIP\_28396:100.0, WHIP\_28395:100.0):100.0):100.0, (WHIP\_09822:100.0, WHIP\_09824:100.0):100.0):  
100.0):100.0, ((((((DEER\_29538:100.0, DEER\_29535:100.0):100.0, DEER\_29531:100.0):  
73.0, DEER\_29536:100.0):97.0, ((DEER\_29537:100.0, DEER\_29532:100.0):100.0, DEER\_28385:100.0):  
100.0, (DEER\_29539:100.0, DEER\_00569:100.0):88.0):99.0):93.0, DEER\_00571:100.0):100.0,  
(IrW\_LU1219:100.0, (((IrW\_LU1215:100.0, IrW\_LU1216:100.0, IWOF\_21534:100.0):94.0):  
86.0, IrW\_LU1218:100.0):93.0, IWOF\_07590:100.0):82.0, ((IWOF\_08486:100.0, IrW\_LU1217:100.0):  
100.0, IWOF\_07534:100.0):93.0):100.0):83.0, IWOF\_05908:100.0):100.0):100.0):100.0,  
(BORZ\_00979:100.0, BORZ\_28388:100.0):100.0, BORZ\_27924:100.0):100.0,  
(BORZ\_12818:100.0, BORZ\_12879:100.0):55.0, (BORZ\_27197:100.0, BORZ\_13142:100.0):59.0):  
63.0, BORZ\_13141:100.0):87.0):78.0, BORZ\_00978:100.0):86.0, BORZ\_27195:100.0):100.0):78.0):100.0):  
43.0):16.0, ((((((BMAL\_Z9D10:100.0, BMAL\_Z9B12:100.0):100.0, BMAL\_18A03:100.0):  
100.0, BMAL\_Z9B05:100.0):100.0, (BMAL\_Z9G11:100.0, BMAL\_39E06:100.0):100.0):100.0,  
(TURV\_27484:100.0, TURV\_24636:100.0):100.0, BeT\_00GT25:100.0):63.0, BeT\_00GT18:100.0):65.0,  
(BELS\_28284:100.0, BELS\_24606:100.0):63.0, (BELS\_23989:100.0,  
(BELS\_28296:100.0, BELS\_15646:100.0):58.0):42.0):53.0, ((BELS\_28292:100.0, BELS\_22734:100.0):  
47.0, BELS\_22739:100.0):53.0):57.0, (BELS\_27485:100.0, BELS\_22740:100.0):95.0):61.0):100.0,  
(TURV\_22772:100.0, ((BeT\_00GT23:100.0, TURV\_24635:100.0):100.0,  
(BeT\_00GT24:100.0, BeT\_00GT22:100.0):100.0):100.0, TURV\_22781:100.0):99.0):100.0):100.0):100.0,  
(BOUV\_34F01:100.0, (((BOUV\_34C06:100.0, BOUV\_34B06:100.0):100.0, BOUV\_34G01:100.0):100.0,  
(BOUV\_34E01:100.0, BOUV\_35D07:100.0):100.0):100.0, BOUV\_35D03:100.0):100.0):  
100.0, BOUV\_35E04:100.0):100.0):70.0, (((BRIA\_14565:100.0, BRIA\_27587:100.0):  
100.0, BRIA\_14502:100.0):100.0, BRIA\_07780:100.0):100.0, ((((((BRIA\_20022:100.0, BRIA\_20217:100.0):  
64.0, BRIA\_20240:100.0):58.0, BRIA\_20026:100.0):62.0, BRIA\_20212:100.0):100.0, BRIA\_20268:100.0):  
100.0):100.0):70.0):36.0, ((((((FCR\_012026:100.0, FCR\_020576:100.0):100.0,  
(FCR\_010697:100.0, FCR\_027140:100.0):100.0, (FCR\_027273:100.0, FCR\_027107:100.0):100.0):100.0):  
100.0, ((FCR\_024743:100.0, FCR\_028379:100.0):100.0, (FCR\_027007:100.0, FCR\_027420:100.0):100.0):  
100.0):100.0, ((((((GOLD\_07286:100.0, GOLD\_26997:100.0):100.0,  
(GRe\_0GT212:100.0, GRe\_0GT218:100.0):100.0, GOLD\_27004:100.0):100.0, GOLD\_27014:100.0):100.0):  
95.0, GOLD\_27005:100.0):100.0, GRe\_0GT220:100.0):100.0, GRe\_0GT217:100.0):100.0, GRe\_0GT219:100.0):  
100.0):100.0, ((LRe\_0GT269:100.0, (LRe\_0GT272:100.0, (LAB\_022113:100.0, LAB\_011121:100.0):100.0):  
73.0):100.0, ((LAB\_012997:100.0, LRe\_0GT273:100.0):100.0, ((LAB\_012019:100.0, LRe\_0GT270:100.0):  
100.0, LAB\_011949:100.0):100.0, LRe\_0GT271:100.0):91.0):100.0):100.0):100.0,  
(NFD\_LU1386:100.0, NEWF\_21473:100.0):100.0, NEWF\_00018:100.0):100.0, NEWF\_00277:100.0):  
100.0, NEWF\_00057:100.0):86.0, NEWF\_07312:100.0):100.0, ((NFD\_LU1390:100.0, NFD\_LU1385:100.0):  
100.0, NFD\_LU1387:100.0):96.0, NFD\_LU1388:100.0):100.0):100.0):100.0),  
(IWSP\_27029:100.0, IWSP\_28372:100.0):87.0, ((IWSP\_28373:100.0, IWSP\_07569:100.0):100.0,  
(IWSP\_07575:100.0, IWSP\_27438:100.0):100.0):100.0):99.0, ((IWSP\_27560:100.0, IWSP\_07556:100.0):

100.0,IWSP\_07522:100.0):99.0):100.0,IWSP\_07761:100.0):100.0,  
(((CCRT\_27018:100.0,CCRT\_27336:100.0):100.0,(CCRT\_27282:100.0,CCRT\_27031:100.0):100.0):100.0,  
(CCRT\_42G05:100.0,CCRT\_30E02:100.0):75.0):100.0):96.0):71.0,(NSD\_0GT293:100.0,  
((((NSD\_0GT294:100.0,(NSD\_0GT292:100.0,NSDT\_26994:100.0):65.0):100.0,NSD\_0GT296:100.0):68.0,  
(NSDT\_29586:100.0,NSDT\_29588:100.0):100.0):62.0,NSD\_0GT295:100.0):63.0,NSD\_0GT289:100.0):  
63.0,NSD\_0GT291:100.0):100.0):100.0):30.0,(((((((VIZS\_26998:100.0,(VIZS\_28366:100.0,  
(VIZS\_27051:100.0,VIZS\_27073:100.0):100.0):100.0,VIZS\_28367:100.0):100.0):  
52.0,VIZS\_27571:100.0):48.0,VIZS\_27015:100.0):100.0,(((WHPG\_27016:100.0,WHPG\_27017:100.0):  
100.0,(((WHPG\_27039:100.0,WHPG\_27013:100.0):100.0,WHPG\_27001:100.0):100.0,WHPG\_27012:100.0):  
100.0):100.0,((((((GSHP\_29549:100.0,GSHP\_03069:100.0):100.0,GSHP\_29550:100.0):58.0,  
(GSHP\_28771:100.0,GSHP\_27023:100.0):58.0,GSHP\_29551:100.0):49.0):100.0,  
(GSHP\_15392:100.0,GSHP\_13151:100.0):100.0):100.0,GSHP\_15394:100.0):100.0,GSHP\_29548:100.0):  
100.0,(GWHP\_16E05:100.0,GWHP\_17B10:100.0):100.0):100.0):100.0):100.0,  
((KMUN\_27295:100.0,KMUN\_27292:100.0):100.0,KMUN\_27296:100.0):100.0):71.0,  
((SPIN\_17A07:100.0,SPIN\_16E03:100.0):100.0,((((((GoS\_0LU606:100.0,GoS\_0LU616:100.0):100.0,  
(GoS\_0LU613:100.0,GoS\_0LU625:100.0):100.0):100.0,(GoS\_0LU619:100.0,  
(GoS\_0LU610:100.0,GoS\_0LU615:100.0):100.0):100.0,((GSET\_26995:100.0,GSET\_28456:100.0):  
100.0,GoS\_0LU607:100.0):99.0):100.0,((((((Est\_0GT167:100.0,(Est\_0GT166:100.0,Est\_0GT164:100.0):  
100.0):100.0,(Est\_0GT170:100.0,Est\_0GT169:100.0):100.0):100.0,Est\_0GT168:100.0):100.0,  
((Est\_0GT162:100.0,Est\_0GT163:100.0):100.0,Est\_0GT161:100.0):100.0):100.0,Est\_0GT165:100.0):  
100.0):100.0,((((((ISET\_15B10:100.0,ISET\_27450:100.0):91.0,(ISET\_15F10:100.0,ISET\_13A10:100.0):  
100.0):97.0,ISET\_15A12:100.0):93.0,(ISET\_27002:100.0,ISET\_27022:100.0):100.0):  
99.0,ISET\_13H10:100.0):100.0,ISET\_15E12:100.0):100.0):100.0,  
((((((BRIT\_27137:100.0,BRIT\_27117:100.0):100.0,(BRIT\_13150:100.0,BRIT\_28919:100.0):100.0):  
100.0,BRIT\_12727:100.0):100.0,((BrS\_00GT83:100.0,BrS\_00GT82:100.0):100.0,BrS\_00GT85:100.0):  
99.0):99.0,BrS\_00GT84:100.0):100.0,BrS\_00GT81:100.0):100.0):100.0):68.0):98.0,  
((((((Wei\_0GT414:100.0,Wei\_0GT407:100.0):100.0,((Wei\_0GT409:100.0,Wei\_0GT411:100.0):  
100.0,Wei\_0GT413:100.0):100.0,Wei\_0GT410:100.0):100.0):100.0,Wei\_0GT416:100.0):  
100.0,Wei\_0GT412:100.0):100.0,Wei\_0GT408:100.0):100.0,Wei\_0GT417:100.0):100.0):100.0,  
(((DALM\_Z4C09:100.0,DALM\_Z5F08:100.0):100.0,DALM\_Z4A06:100.0):100.0,  
(((DALM\_Z7381:100.0,DALM\_Z7075:100.0):100.0,((DALM\_Z7076:100.0,DALM\_13301:100.0):  
100.0,DALM\_Z5G10:100.0):100.0):100.0,DALM\_Z5H10:100.0):100.0):34.0):13.0,  
((((((FIEL\_27194:100.0,(FIEL\_27191:100.0,FIEL\_27554:100.0):100.0):100.0,FIEL\_28377:100.0):  
100.0,((((((ECKR\_28369:100.0,ECKR\_28473:100.0):79.0,ECKR\_28475:100.0):100.0,ECKR\_28380:100.0):  
100.0,(CoS\_00GT92:100.0,(ECKR\_27591:100.0,CoS\_00GT93:100.0):100.0):67.0):  
100.0,CoS\_00GT95:100.0):100.0,(CoS\_00GT91:100.0,CoS\_00GT94:100.0):100.0):100.0),  
((ACKR\_09007:100.0,((ACKR\_12453:100.0,ACKR\_09032:100.0):100.0,ACKR\_11414:100.0):  
100.0,ACKR\_12452:100.0):81.0,ACKR\_12451:100.0):100.0):100.0,(ACKR\_09030:100.0,  
((ACKR\_09991:100.0,ACKR\_09110:100.0):100.0,ACKR\_27116:100.0):100.0):73.0):100.0):100.0,  
((((((CKCS\_14911:100.0,CKCS\_14916:100.0):100.0,CKCS\_13193:100.0):100.0,  
((CKCS\_14520:100.0,CKCS\_07279:100.0):100.0,CKCS\_00952:100.0):76.0):69.0,  
((CKCS\_14913:100.0,CKCS\_15286:100.0):100.0,CKCS\_27121:100.0):73.0):98.0,CKCS\_14912:100.0):  
100.0):57.0,(((((((ESSP\_04237:100.0,ESSP\_28464:100.0):100.0,ESSP\_04232:100.0):100.0,  
(ESSP\_04238:100.0,ESSP\_04235:100.0):100.0):100.0,ESSP\_04239:100.0):100.0,ESSP\_04236:100.0):  
100.0,ESSP\_04198:100.0):100.0,ESSP\_13184:100.0):100.0,ESSP\_13183:100.0):100.0):  
100.0,INCA\_Z2C03:100.0):38.0):26.0,(((((((BEAG\_07862:100.0,  
(((BEAG\_07907:100.0,BEAG\_01327:100.0):100.0,BgI\_000GT5:100.0):99.0,  
(BgI\_000GT6:100.0,BgI\_000GT7:100.0):93.0):100.0,BgI\_000GT9:100.0):85.0):56.0,  
(BEAG\_07870:100.0,BgI\_000GT8:100.0):100.0):100.0,BEAG\_01324:100.0):100.0,REDB\_35F11:100.0):  
100.0,(((((((OTTR\_36H04:100.0,OTTR\_36F04:100.0):100.0,OTTR\_17D03:100.0):  
100.0,OTTR\_36E04:100.0):100.0,OTTR\_16C07:100.0):100.0,(OTTR\_16B07:100.0,OTTR\_17H04:100.0):  
100.0,OTTR\_36A05:100.0):100.0):100.0,OTTR\_17C03:100.0):100.0,  
(((BLDH\_28398:100.0,BLDH\_11438:100.0):100.0,((BLDH\_11432:100.0,BLDH\_01186:100.0):  
100.0,BLDH\_11437:100.0):100.0,BLDH\_25394:100.0):100.0):100.0,  
((BLDH\_25393:100.0,BLDH\_11433:100.0):100.0,BLDH\_11431:100.0):100.0):100.0,BLDH\_11436:100.0):  
100.0):100.0,(FOXH\_23096:100.0,((FOXH\_23077:100.0,FOXH\_23089:100.0):100.0,  
((((FOXH\_23110:100.0,FOXH\_23080:100.0):100.0,FOXH\_23078:100.0):100.0,FOXH\_23094:100.0):  
96.0,FOXH\_23074:100.0):100.0):100.0,FOXH\_23056:100.0):100.0,FOXH\_23075:100.0):100.0):100.0):  
98.0):98.0,REDB\_35B12:100.0):100.0,((((BASS\_10375:100.0,BASS\_10366:100.0):  
100.0,BASS\_10342:100.0):100.0,BASS\_10351:100.0):100.0,(BASS\_10335:100.0,  
(BASS\_10333:100.0,BASS\_10355:100.0):99.0):100.0,(BASS\_10340:100.0,BASS\_10350:100.0):100.0):  
74.0):56.0,BASS\_10372:100.0):100.0):83.0,((PBGV\_09420:100.0,PBGV\_14506:100.0):100.0,  
((((PBGV\_07322:100.0,(PBGV\_09400:100.0,PBGV\_11478:100.0):95.0):61.0,PBGV\_09415:100.0):  
64.0,PBGV\_09393:100.0):51.0,PBGV\_12353:100.0):52.0,(PBGV\_09411:100.0,PBGV\_09419:100.0):64.0):  
65.0):100.0):100.0,(DACH\_08257:100.0,((((Dac\_0GT116:100.0,DACH\_08267:100.0):  
100.0,Dac\_0GT117:100.0):75.0,(Dac\_0GT118:100.0,DACH\_08265:100.0):100.0):76.0,DACH\_08260:100.0):  
67.0,Dac\_0GT114:100.0):63.0):79.0,(DACH\_08241:100.0,Dac\_0GT115:100.0):79.0):100.0):92.0):35.0):  
12.0,(((((((AFGH\_22932:100.0,(AFGH\_27567:100.0,AFGH\_13118:100.0):55.0,



((JRT\_0GT254:100.0,(JRT\_0GT256:100.0,JRT\_0GT257:100.0):100.0):100.0,JRT\_0GT260:100.0):96.0):  
78.0,((JRT\_0GT250:100.0,JRT\_0GT255:100.0):100.0,(JRT\_0GT253:100.0,JRT\_0GT261:100.0):100.0):  
99.0):78.0,(PARS\_27079:100.0,PARS\_27058:100.0):100.0,JRT\_0GT258:100.0):100.0,  
(((BEDT\_17A06:100.0,BEDT\_16E01:100.0):96.0,BEDT\_16B03:100.0):100.0,  
(((BEDT\_28909:100.0,BEDT\_28915:100.0):100.0,BEDT\_28916:100.0):100.0,BEDT\_27105:100.0):100.0):  
100.0,(((BoT\_00LU64:100.0,BoT\_00LU66:100.0):100.0,((BoT\_00LU65:100.0,BoT\_00LU63:100.0):  
100.0,BoT\_00LU67:100.0):100.0):99.0,((BORT\_27171:100.0,(BORT\_08386:100.0,BORT\_25438:100.0):  
100.0):100.0,BORT\_27568:100.0):99.0):100.0,BoT\_00LU62:100.0):100.0):28.0):62.0,  
(((MXOL\_Z1D01:100.0,MXOL\_Z2E01:100.0):100.0,(MNTY\_43F07:100.0,MNTY\_34H04:100.0):100.0):94.0,  
(((((((MPIN\_12873:100.0,MPIN\_12867:100.0):100.0,MPIN\_12866:100.0):100.0,MPIN\_12869:100.0):  
100.0,MPIN\_12872:100.0):100.0,MPIN\_12874:100.0):100.0,MPIN\_12877:100.0):  
100.0,MPIN\_13229:100.0):100.0,MPIN\_12876:100.0):100.0,MPIN\_12870:100.0):  
100.0,MXOL\_Z2D01:100.0):92.0):77.0):44.0,((((((AHRT\_01080:100.0,AHRT\_01081:100.0):  
100.0,AHRT\_01122:100.0):100.0,((AHRT\_01120:100.0,AHRT\_01121:100.0):94.0,AHRT\_01079:100.0):  
91.0,AHRT\_01117:100.0):100.0):100.0,AHRT\_01123:100.0):100.0,(TYFX\_16D09:100.0,  
((TYFX\_17D06:100.0,TYFX\_17A02:100.0):100.0,TYFX\_16G08:100.0):100.0):100.0):77.0,  
((AHRT\_24735:100.0,RATT\_28508:100.0):93.0):61.0,(AHRT\_25647:100.0,RATT\_28509:100.0):57.0):98.0,  
((((CHIH\_01202:100.0,CHIH\_01204:100.0):100.0,((CHIH\_13132:100.0,  
((CHIH\_01205:100.0,CHIH\_01206:100.0):96.0,CHIH\_27201:100.0):96.0):75.0,(CHIH\_13167:100.0,  
CHIH\_13129:100.0,CHIH\_13131:100.0):100.0):96.0):94.0):100.0,CHIH\_14923:100.0):100.0,  
(((CRES\_Z4D01:100.0,CRES\_Z5F09:100.0):100.0,((CRES\_Z5A12:100.0,CRES\_Z4B01:100.0):  
100.0,CRES\_Z5H11:100.0):85.0,((CRES\_Z5G11:100.0,CRES\_Z4C01:100.0):100.0,  
CRES\_Z4A01:100.0,CRES\_Z4H01:100.0):100.0):99.0):44.0,CRES\_Z5B12:100.0):100.0):100.0):  
36.0):35.0):21.0,(((((((PTWD\_05838:100.0,PTWD\_09118:100.0):100.0,  
PTWD\_06145:100.0,PTWD\_06247:100.0):100.0):100.0,PTWD\_05676:100.0):99.0,PTWD\_05874:100.0):  
99.0,PTWD\_05827:100.0):100.0,PTWD\_06621:100.0):97.0,PTWD\_27192:100.0):63.0,PTWD\_05862:100.0):  
100.0,(COTO\_34E10:100.0,COTO\_44G10:100.0):100.0):28.0,(((((((BICH\_Z1D09:100.0,  
BICH\_13E09:100.0,BICH\_13C09:100.0):72.0):58.0,BICH\_10H01:100.0):100.0,  
BICH\_12A06:100.0,BICH\_10G01:100.0):100.0):95.0,(BICH\_13C10:100.0,BICH\_13D09:100.0):94.0):  
98.0,BICH\_13G11:100.0):62.0,BICH\_12E05:100.0):100.0,  
(((((((MALT\_27446:100.0,MALT\_27447:100.0):100.0,MALT\_37C01:100.0):100.0,MALT\_37G01:100.0):  
73.0,MALT\_37H01:100.0):100.0,MALT\_37E01:100.0):90.0,(MALT\_37B01:100.0,MALT\_37D01:100.0):100.0):  
100.0,MALT\_37F01:100.0):73.0,MALT\_37A01:100.0):100.0,((((HAVA\_07524:100.0,  
((HAVA\_07323:100.0,HAVA\_07424:100.0):98.0,HAVA\_27160:100.0):88.0,  
HAVA\_07423:100.0,HAVA\_07628:100.0):88.0):100.0):100.0,(HAVA\_07533:100.0,HAVA\_27929:100.0):  
100.0):100.0,HAVA\_27428:100.0):100.0,HAVA\_27930:100.0):100.0):100.0,  
(((((((MP00\_27223:100.0,MP00\_28538:100.0):100.0,((MP00\_28524:100.0,MP00\_28525:100.0):  
100.0,MP00\_28535:100.0):100.0):100.0,MP00\_27535:100.0):100.0,TPO0\_26331:100.0):53.0,  
((TPO0\_09079:100.0,TPO0\_09080:100.0):100.0,((TPO0\_09069:100.0,  
TPO0\_09064:100.0,TPO0\_09067:100.0):100.0):100.0,TPO0\_27222:100.0):53.0):53.0),  
MP00\_28526:100.0,(MP00\_28478:100.0,MP00\_28542:100.0):100.0):100.0):53.0):  
100.0,MP00\_28469:100.0):100.0,(TPO0\_10439:100.0,TPO0\_10442:100.0):100.0):  
100.0,TPO0\_07578:100.0):100.0,(((((((StP\_0GT378:100.0,SPO0\_27151:100.0):  
100.0,SPO0\_27225:100.0):100.0,SPO0\_28536:100.0):100.0,StP\_0GT376:100.0):100.0,  
SPO0\_27219:100.0,SPO0\_27218:100.0):100.0):100.0,StP\_0GT377:100.0):100.0,  
StP\_0GT375:100.0,StP\_0GT379:100.0):100.0):100.0):81.0):31.0):47.0,  
((PUMI\_29695:100.0,PUMI\_29698:100.0):100.0,((PUMI\_29697:100.0,PUMI\_29696:100.0):  
100.0,PUMI\_29689:100.0):100.0):100.0,((PULI\_14E05:100.0,PULI\_14F06:100.0):  
61.0,PULI\_27429:100.0):100.0,PULI\_27129:100.0):100.0):100.0):30.0,  
(((((((POM\_006435:100.0,POM\_006433:100.0):100.0,(POM\_001235:100.0,POM\_006410:100.0):99.0):  
100.0,POM\_001271:100.0):65.0,POM\_006421:100.0):100.0,POM\_008522:100.0):53.0,POM\_008520:100.0):  
100.0,POM\_008521:100.0):64.0,POM\_012763:100.0):100.0,(((VPIN\_24518:100.0,VPIN\_24529:100.0):  
100.0,VPIN\_24547:100.0):100.0,VPIN\_24536:100.0):100.0):100.0,((AESK\_14G01:100.0,  
((AESK\_14D02:100.0,AESK\_14G07:100.0):95.0,AESK\_15D02:100.0):70.0,AESK\_14D08:100.0):84.0):  
100.0,AESK\_14E07:100.0):100.0):97.0,((((PAPI\_22902:100.0,PAPI\_28460:100.0):  
100.0,PAPI\_23524:100.0):98.0,(((PAPI\_06685:100.0,PAPI\_22901:100.0):100.0,PAPI\_14935:100.0):  
99.0,(PAPI\_06205:100.0,PAPI\_07262:100.0):99.0):100.0,PAPI\_28462:100.0):98.0):  
100.0,PAPI\_27882:100.0):100.0,((BRUS\_Z5H09:100.0,BRUS\_Z4F02:100.0):100.0,  
((((PUG\_001021:100.0,PUG\_001018:100.0):87.0,(PUG\_001026:100.0,  
PUG\_001027:100.0,PUG\_001069:100.0):100.0):92.0):46.0,PUG\_001030:100.0):50.0,  
PUG\_001025:100.0,PUG\_001022:100.0):50.0):94.0,PUG\_001104:100.0):100.0,PUG\_001183:100.0):  
100.0):100.0,(((Sci\_LU1457:100.0,Sci\_LU1466:100.0):100.0,  
((Sci\_LU1461:100.0,Sci\_LU1473:100.0):100.0,(Sci\_LU1464:100.0,Sci\_LU1469:100.0):100.0):100.0):  
100.0,(Sci\_LU1458:100.0,Sci\_LU1468:100.0):100.0):72.0,Sci\_LU1471:100.0):  
100.0,Sci\_LU1455:100.0):100.0):58.0):39.0,(((MSNZ\_07671:100.0,  
((MSNZ\_12930:100.0,MSNZ\_12928:100.0):100.0,(MSNZ\_24693:100.0,MSNZ\_07530:100.0):80.0):80.0,  
MSNZ\_25440:100.0,(MSNZ\_24692:100.0,MSNZ\_07672:100.0):78.0):80.0):89.0):  
100.0,MSNZ\_24656:100.0):100.0,MSNZ\_12929:100.0):100.0,((SSNZ\_03180:100.0,

((((SSNZ\_11497:100.0,SSNZ\_11491:100.0):100.0,SSNZ\_11496:100.0):100.0,  
((SSNZ\_11494:100.0,SSNZ\_27424:100.0):100.0,SSNZ\_07420:100.0):100.0):100.0,SSNZ\_11495:100.0):  
100.0):100.0,(SSNZ\_11493:100.0,SSNZ\_03181:100.0):100.0):100.0):36.0):52.0,  
(((((((Elk\_0GT135:100.0,Elk\_0GT133:100.0):71.0,Elk\_0GT136:100.0):94.0,Elk\_0GT132:100.0):  
98.0,Elk\_0GT129:100.0):91.0,Elk\_0GT131:100.0):100.0,Elk\_0GT130:100.0):100.0,(NELK\_28504:100.0,  
Elk\_0GT137:100.0,Elk\_0GT134:100.0):100.0):100.0):100.0,(((KEES\_24628:100.0,  
(KEES\_29630:100.0,KEES\_29631:100.0):100.0,(KEES\_27433:100.0,KEES\_24631:100.0):  
71.0,KEES\_24630:100.0):100.0):100.0):100.0,((KEES\_24629:100.0,KEES\_22830:100.0):  
100.0,KEES\_24633:100.0):100.0):100.0,KEES\_28498:100.0):100.0,  
(ICES\_24E02:100.0,ICES\_21B07:100.0):100.0):57.0,((SVAL\_8407:100.0,  
SVAL\_8343:100.0,SVAL\_10069:100.0):100.0):100.0,((SVAL\_10600:100.0,SVAL\_10043:100.0):  
100.0,SVAL\_10447:100.0):79.0):89.0):83.0):73.0,(((TIBT\_26F12:100.0,  
(TIBT\_26D12:100.0,TIBT\_26G12:100.0):90.0):100.0,(TIBT\_26H12:100.0,(TIBT\_26260:100.0,  
(TIBT\_03185:100.0,TIBT\_30324:100.0):100.0):98.0):100.0):100.0,(TIBT\_03186:100.0,  
(TIBT\_03184:100.0,TIBT\_35G02:100.0):100.0):100.0):75.0,  
((((((PEKE\_27448:100.0,PEKE\_22961:100.0):100.0,((PEKE\_22966:100.0,(PEKE\_24587:100.0,  
(PEKE\_23363:100.0,(PEKE\_23354:100.0,PEKE\_23347:100.0):60.0):98.0):70.0,PEKE\_23359:100.0):98.0):  
97.0,PEKE\_23356:100.0):61.0):100.0,PEKE\_22957:100.0):100.0,(((((((SHIH\_03614:100.0,  
(SHIH\_03616:100.0,SHIH\_03615:100.0):100.0):100.0,SHIH\_03590:100.0):100.0,SHIH\_03576:100.0):  
92.0,SHIH\_03166:100.0):75.0,SHIH\_03593:100.0):95.0,SHIH\_03613:100.0):100.0,SHIH\_03591:100.0):  
99.0,SHIH\_03191:100.0):100.0,((((((LHSA\_15F04:100.0,LHSA\_19B01:100.0):100.0,LHSA\_18C10:100.0):  
100.0,LHSA\_18D03:100.0):59.0,LHSA\_18G09:100.0):59.0,(LHSA\_14D11:100.0,LHSA\_38E10:100.0):  
59.0,LHSA\_14E09:100.0):59.0):39.0,(LHSA\_14H03:100.0,LHSA\_18E09:100.0):46.0):50.0):50.0):56.0,  
(((TIBS\_05383:100.0,TIBS\_05379:100.0):65.0,TIBS\_05380:100.0):65.0,  
((((TIBS\_05382:100.0,TIBS\_05381:100.0):100.0,TIBS\_18H01:100.0):89.0,  
(TIBS\_37B05:100.0,TIBS\_37A05:100.0):100.0):66.0,(TIBS\_37H04:100.0,TIBS\_15A09:100.0):94.0):  
65.0):100.0,((CHIN\_14F04:100.0,CHIN\_14B01:100.0):100.0,  
(CHIN\_14F01:100.0,CHIN\_14F02:100.0):100.0):100.0):100.0):80.0,  
((((((FSp\_0GT187:100.0,FSp\_0GT191:100.0):100.0,((FSp\_0GT186:100.0,FSp\_0GT194:100.0):  
100.0,FSp\_0GT189:100.0):79.0,FSp\_0GT188:100.0):100.0):100.0,FSp\_0GT193:100.0):  
100.0,FSp\_0GT192:100.0):100.0,FSp\_0GT185:100.0):92.0,FSp\_0GT190:100.0):100.0):82.0,  
((((((SAMO\_27207:100.0,SAMO\_27205:100.0):100.0,(SAMO\_28936:100.0,SAMO\_27927:100.0):100.0):  
67.0,SAMO\_23541:100.0):81.0,SAMO\_14507:100.0):83.0,((SAMO\_14510:100.0,SAMO\_00229:100.0):  
100.0,SAMO\_14535:100.0):83.0):100.0,SAMO\_24139:100.0):100.0):82.0,  
((((((Eur\_0GT178:100.0,Eur\_0GT174:100.0):100.0,Eur\_0GT180:100.0):100.0,Eur\_0GT182:100.0):  
100.0,Eur\_0GT177:100.0):100.0,(Eur\_0GT181:100.0,Eur\_0GT175:100.0):100.0):100.0,  
(Eur\_0GT176:100.0,Eur\_0GT173:100.0):100.0,Eur\_0GT179:100.0):100.0):100.0,  
((((((AMAL\_29547:100.0,AMAL\_29545:100.0):100.0,AMAL\_29541:100.0):100.0,  
(((AMAL\_14509:100.0,AMAL\_29546:100.0):100.0,AMAL\_29540:100.0):85.0,(AMAL\_29543:100.0,  
AMAL\_27127:100.0,AMAL\_29544:100.0):85.0):61.0):85.0,AMAL\_29542:100.0):63.0):100.0,  
((((((GSL\_0GT234:100.0,GSL\_0GT228:100.0):100.0,(GSL\_0GT229:100.0,GSL\_0GT227:100.0):100.0):88.0,  
(GSL\_0GT233:100.0,GSL\_0GT232:100.0):100.0,(GSL\_0GT235:100.0,GSL\_0GT226:100.0):100.0):76.0):  
95.0,GSL\_0GT230:100.0):84.0,GSL\_0GT231:100.0):100.0):100.0,((((((HUSK\_11490:100.0,  
(HUSK\_28926:100.0,(HUSK\_15873:100.0,HUSK\_29464:100.0):65.0):77.0,HUSK\_11487:100.0):97.0):  
100.0,HUSK\_15872:100.0):61.0,HUSK\_11480:100.0):48.0,HUSK\_28487:100.0):98.0,  
(HUSK\_28925:100.0,HUSK\_14529:100.0):98.0):100.0):100.0,  
((((((CHOW\_23372:100.0,CHOW\_15628:100.0):63.0,CHOW\_28871:100.0):100.0,  
(((CHOW\_28872:100.0,CHOW\_22802:100.0):100.0,(CHOW\_28874:100.0,CHOW\_13802:100.0):100.0):70.0,  
(CHOW\_28880:100.0,CHOW\_28885:100.0):93.0):100.0):100.0,CHOW\_15630:100.0):100.0,  
((((((SHAR\_11448:100.0,(ShP\_0GT365:100.0,SHAR\_11449:100.0):99.0,SHAR\_28940:100.0):100.0):  
100.0,ShP\_0GT367:100.0):100.0,(SHAR\_07995:100.0,SHAR\_13168:100.0):100.0):  
100.0,ShP\_0GT366:100.0):51.0,ShP\_0GT368:100.0):51.0,ShP\_0GT364:100.0):100.0):100.0,  
((((((AKIT\_01278:100.0,(AKIT\_01131:100.0,AKIT\_01101:100.0):94.0):100.0,AKIT\_01130:100.0):66.0,  
(AKIT\_12755:100.0,AKIT\_01134:100.0):100.0):66.0,AKIT\_01132:100.0):100.0,  
(AKIT\_12692:100.0,AKIT\_12342:100.0):100.0):100.0,AKIT\_01273:100.0):99.0,  
((((((SHIB\_17H01:100.0,SHIB\_16D12:100.0):100.0,(SHIB\_17B05:100.0,SHIB\_16C08:100.0):97.0):  
94.0,SHIB\_10B09:100.0):60.0,(SHIB\_10A09:100.0,(SHIB\_10H08:100.0,SHIB\_10G08:100.0):100.0):60.0):  
100.0):100.0,(((TIBM\_06477:100.0,(TIBM\_06481:100.0,TIBM\_06479:100.0):100.0):  
100.0,TIBM\_06478:100.0):76.0,TIBM\_06482:100.0):100.0,(((TIBM\_25313:100.0,TIBM\_25311:100.0):  
100.0,(TIBM\_25314:100.0,TIBM\_25310:100.0):100.0):100.0,TIBM\_25312:100.0):98.0):100.0):100.0,  
((((((XIGO\_24479:100.0,XIGO\_24480:100.0):100.0,XIGO\_24481:100.0):100.0,XIGO\_24477:100.0):  
100.0,XIGO\_24478:100.0):100.0):100.0,(((((((BSJI\_04229:100.0,  
(BSJI\_04208:100.0,BSJI\_04212:100.0):100.0):100.0,BSJI\_27182:100.0):100.0,BSJI\_04204:100.0):  
76.0,BSJI\_27387:100.0):100.0,BSJI\_12694:100.0):100.0,BSJI\_28497:100.0):100.0,BSJI\_20567:100.0):  
100.0,BSJI\_04207:100.0):100.0):100.0,WOLF\_24315:100.0):100.0,WOLF\_24889:100.0):95.0,  
(((WOLF\_24890:100.0,WOLF\_24888:100.0):100.0,WOLF\_24314:100.0):100.0,WOLF\_24892:100.0):100.0):  
94.0,WOLF\_24891:100.0):100.0,GDJK\_24316:100.0):100.0,GDJK\_24589:100.0);  
end;
